# Supplementary material for: Novel functional insights into the microbiome inhabiting marine plastic debris: critical considerations to counteract the challenges of thin biofilms using multi-omics and comparative metaproteomics.
Source: Research Square preprint supplement (doi:10.21203/rs.3.rs-3097262/v1), 2023-06-27
Supplement: Supplementary file 1 [file 21ec522d320c0dc0ae945c9c.xlsx]

## Sheet: Bacteria_Archaea
Read count	Classification	Domain	Phylum	Class	Order	Family	Genus	Species	Strain	Other
2	cellular organisms	Bacteria	Verrucomicrobia
1	cellular organisms	Bacteria	Verrucomicrobia	Methylacidiphilae	Methylacidiphilales	Methylacidiphilaceae	Methylacidiphilum	Methylacidiphilum fumariolicum
1	cellular organisms	Bacteria	Verrucomicrobia	Methylacidiphilae	Methylacidiphilales	Methylacidiphilaceae	Methylacidiphilum	unclassified Methylacidiphilum	Methylacidiphilum sp. RTK17.1
2	cellular organisms	Bacteria	Verrucomicrobia	Methylacidiphilae	Methylacidiphilales	Methylacidiphilaceae	Methylacidiphilum	Methylacidiphilum infernorum
3	cellular organisms	Bacteria	Verrucomicrobia	Methylacidiphilae	Methylacidiphilales	Methylacidiphilaceae	Methylacidiphilum
3	cellular organisms	Bacteria	Verrucomicrobia	Methylacidiphilae	Methylacidiphilales	Methylacidiphilaceae	Methylacidiphilum	unclassified Methylacidiphilum	Methylacidiphilum sp. Phi
1	cellular organisms	Bacteria	Verrucomicrobia	Opitutae	Opitutales	Opitutaceae	unclassified Opitutaceae	Opitutaceae bacterium TAV3
1	cellular organisms	Bacteria	Verrucomicrobia	Opitutae	Puniceicoccales	Puniceicoccaceae	unclassified Puniceicoccaceae	Puniceicoccaceae bacterium MED-G32
1	cellular organisms	Bacteria	Verrucomicrobia	Opitutae	Opitutales	Opitutaceae	unclassified Opitutaceae	Opitutaceae bacterium TAV4
1	cellular organisms	Bacteria	Verrucomicrobia	Opitutae	unclassified Opitutae	Opitutae bacterium SCGC AG-212-L18
10	cellular organisms	Bacteria	Verrucomicrobia	Opitutae	Opitutales	Opitutaceae	unclassified Opitutaceae	Opitutaceae bacterium TAV5
1	cellular organisms	Bacteria	Verrucomicrobia	Opitutae	unclassified Opitutae	Opitutae bacterium AMD-G1
1	cellular organisms	Bacteria	Verrucomicrobia	Opitutae	Opitutales	Opitutaceae	Opitutus	Opitutus terrae	Opitutus terrae PB90-1
6	cellular organisms	Bacteria	Verrucomicrobia	Opitutae	Puniceicoccales	Puniceicoccaceae	unclassified Puniceicoccaceae	Puniceicoccaceae bacterium MED-G31
4	cellular organisms	Bacteria	Verrucomicrobia	Opitutae	Opitutales	unclassified Opitutales	Opitutales bacterium
6	cellular organisms	Bacteria	Verrucomicrobia	Opitutae	Opitutales	Opitutaceae	Cephaloticoccus	Cephaloticoccus capnophilus
8	cellular organisms	Bacteria	Verrucomicrobia	Opitutae	unclassified Opitutae	Opitutae bacterium Tous-C5TDCM
14	cellular organisms	Bacteria	Verrucomicrobia	Opitutae	Opitutales	Opitutaceae	unclassified Opitutaceae
10	cellular organisms	Bacteria	Verrucomicrobia	Opitutae	Puniceicoccales	Puniceicoccaceae	Candidatus Moanabacter	Candidatus Moanabacter tarae
32	cellular organisms	Bacteria	Verrucomicrobia	Opitutae	Opitutales	Opitutaceae	Lacunisphaera	unclassified Lacunisphaera	Lacunisphaera sp. TWA-58
17	cellular organisms	Bacteria	Verrucomicrobia	Opitutae	Puniceicoccales	Puniceicoccaceae	Coraliomargarita	Coraliomargarita akajimensis
57	cellular organisms	Bacteria	Verrucomicrobia	Opitutae	Opitutales	Opitutaceae	unclassified Opitutaceae	Opitutaceae bacterium BACL24 MAG-120322-bin51
47	cellular organisms	Bacteria	Verrucomicrobia	Opitutae	Opitutales	Opitutaceae	unclassified Opitutaceae	Opitutaceae bacterium EW11
50	cellular organisms	Bacteria	Verrucomicrobia	Opitutae	unclassified Opitutae	Opitutae bacterium Tous-C1TDCM
36	cellular organisms	Bacteria	Verrucomicrobia	Opitutae	Opitutales	Opitutaceae	Lacunisphaera	Lacunisphaera limnophila
9	cellular organisms	Bacteria	Verrucomicrobia	Opitutae	unclassified Opitutae	Opitutae bacterium Tous-C10FEB
35	cellular organisms	Bacteria	Verrucomicrobia	Opitutae	Opitutales	Opitutaceae	Nibricoccus	Nibricoccus aquaticus
43	cellular organisms	Bacteria	Verrucomicrobia	Opitutae	Opitutales	Opitutaceae	Opitutus	unclassified Opitutus	Opitutus sp. GAS368
1	cellular organisms	Bacteria	Verrucomicrobia	Opitutae	Puniceicoccales	Puniceicoccaceae	Coraliomargarita	environmental samples	Coraliomargarita sp. CAG:312
34	cellular organisms	Bacteria	Verrucomicrobia	Opitutae	unclassified Opitutae
2	cellular organisms	Bacteria	Verrucomicrobia	Opitutae	Opitutales	Opitutaceae	Opitutus
19	cellular organisms	Bacteria	Verrucomicrobia	Opitutae	Puniceicoccales	Puniceicoccaceae
2	cellular organisms	Bacteria	Verrucomicrobia	Opitutae	Opitutales	Opitutaceae	Cephaloticoccus	Cephaloticoccus primus
71	cellular organisms	Bacteria	Verrucomicrobia	Opitutae	Puniceicoccales	Puniceicoccaceae	unclassified Puniceicoccaceae	Puniceicoccaceae bacterium
4	cellular organisms	Bacteria	Verrucomicrobia	Opitutae	unclassified Opitutae	Opitutae bacterium TMED67
16	cellular organisms	Bacteria	Verrucomicrobia	Opitutae	Opitutales	Opitutaceae	unclassified Opitutaceae	Opitutaceae bacterium TSB47
1	cellular organisms	Bacteria	Verrucomicrobia	Opitutae	Puniceicoccales	Puniceicoccaceae	unclassified Puniceicoccaceae	Puniceicoccaceae bacterium MED-G30
13	cellular organisms	Bacteria	Verrucomicrobia	Opitutae	Puniceicoccales	unclassified Puniceicoccales	Puniceicoccales bacterium CK1056
25	cellular organisms	Bacteria	Verrucomicrobia	Opitutae	Puniceicoccales	Puniceicoccaceae	Coraliomargarita	unclassified Coraliomargarita	Coraliomargarita sp. WN38
29	cellular organisms	Bacteria	Verrucomicrobia	Opitutae	unclassified Opitutae	Opitutae bacterium Tous-C8FEB
9	cellular organisms	Bacteria	Verrucomicrobia	Opitutae	Opitutales	Opitutaceae	Geminisphaera	Geminisphaera colitermitum
4	cellular organisms	Bacteria	Verrucomicrobia	Opitutae	Opitutales	Opitutaceae	Cephaloticoccus
18	cellular organisms	Bacteria	Verrucomicrobia	Opitutae
16	cellular organisms	Bacteria	Verrucomicrobia	Opitutae	Opitutales	Opitutaceae	Rariglobus	Rariglobus hedericola
1	cellular organisms	Bacteria	Verrucomicrobia	Opitutae	Puniceicoccales	Puniceicoccaceae	Coraliomargarita	unclassified Coraliomargarita	Coraliomargarita sp. TMED73
1	cellular organisms	Bacteria	Verrucomicrobia	Opitutae	Opitutales	Opitutaceae	Opitutus	unclassified Opitutus
12	cellular organisms	Bacteria	Verrucomicrobia	Opitutae	unclassified Opitutae	Opitutae bacterium TMED102
1	cellular organisms	Bacteria	Verrucomicrobia	Opitutae	unclassified Opitutae	Opitutae bacterium AMD-G3
14	cellular organisms	Bacteria	Verrucomicrobia	Opitutae	Opitutales	Opitutaceae	Ereboglobus	Ereboglobus luteus
13	cellular organisms	Bacteria	Verrucomicrobia	Opitutae	Puniceicoccales	Puniceicoccaceae	unclassified Puniceicoccaceae	Puniceicoccaceae bacterium 5H
3	cellular organisms	Bacteria	Verrucomicrobia	Opitutae	unclassified Opitutae	Opitutae bacterium Tous-C4FEB
48	cellular organisms	Bacteria	Verrucomicrobia	Opitutae	Opitutales	Opitutaceae	Opitutus	Opitutus terrae
12	cellular organisms	Bacteria	Verrucomicrobia	Opitutae	Opitutales	Opitutaceae
7	cellular organisms	Bacteria	Verrucomicrobia	Opitutae	Opitutales	Opitutaceae	Lacunisphaera
8	cellular organisms	Bacteria	Verrucomicrobia	Opitutae	Opitutales	unclassified Opitutales	Opitutales bacterium TMED158
11	cellular organisms	Bacteria	Verrucomicrobia	Opitutae	Opitutales	Opitutaceae	unclassified Opitutaceae	Opitutaceae bacterium TAV1
43	cellular organisms	Bacteria	Verrucomicrobia	Opitutae	Opitutales	Opitutaceae	Opitutus	unclassified Opitutus	Opitutus sp. ER46
59	cellular organisms	Bacteria	Verrucomicrobia	Opitutae	unclassified Opitutae	Opitutae bacterium
3	cellular organisms	Bacteria	Verrucomicrobia	Spartobacteria	unclassified Spartobacteria	Spartobacteria bacterium Tous-C9RFEB
1	cellular organisms	Bacteria	Verrucomicrobia	Spartobacteria	Candidatus Xiphinematobacter	unclassified Candidatus Xiphinematobacter	Candidatus Xiphinematobacter sp. Idaho Grape
12	cellular organisms	Bacteria	Verrucomicrobia	Spartobacteria	Chthoniobacterales	Chthoniobacteraceae	Chthoniobacter	unclassified Chthoniobacter	Chthoniobacter sp. 12-60-6
78	cellular organisms	Bacteria	Verrucomicrobia	Spartobacteria	Chthoniobacterales	Chthoniobacteraceae	Chthoniobacter	Chthoniobacter flavus
5	cellular organisms	Bacteria	Verrucomicrobia	Spartobacteria	Terrimicrobium	Terrimicrobium sacchariphilum
8	cellular organisms	Bacteria	Verrucomicrobia	Spartobacteria	unclassified Spartobacteria	Spartobacteria bacterium LR76
8	cellular organisms	Bacteria	Verrucomicrobia	Spartobacteria
22	cellular organisms	Bacteria	Verrucomicrobia	Spartobacteria	Chthoniobacterales	unclassified Chthoniobacterales	Chthoniobacterales bacterium
4	cellular organisms	Bacteria	Verrucomicrobia	Spartobacteria	unclassified Spartobacteria	Spartobacteria bacterium AMD-G5
11	cellular organisms	Bacteria	Verrucomicrobia	Spartobacteria	unclassified Spartobacteria	Spartobacteria bacterium AMD-G4
1	cellular organisms	Bacteria	Verrucomicrobia	unclassified Verrucomicrobia	unclassified Verrucomicrobia (miscellaneous)	Verrucomicrobia bacterium 21-51-4
3	cellular organisms	Bacteria	Verrucomicrobia	unclassified Verrucomicrobia	Methylacidimicrobium	Methylacidimicrobium cyclopophantes
1	cellular organisms	Bacteria	Verrucomicrobia	unclassified Verrucomicrobia	unclassified Verrucomicrobia (miscellaneous)	Verrucomicrobia bacterium CAG:312_58_20
1	cellular organisms	Bacteria	Verrucomicrobia	unclassified Verrucomicrobia	Lentimonas	unclassified Lentimonas	Lentimonas sp. CC19
6	cellular organisms	Bacteria	Verrucomicrobia	unclassified Verrucomicrobia	unclassified Verrucomicrobia (miscellaneous)	Verrucomicrobia bacterium SCGC AAA168-F10
2	cellular organisms	Bacteria	Verrucomicrobia	unclassified Verrucomicrobia	unclassified Verrucomicrobia (miscellaneous)	Verrucomicrobia bacterium LP2A
4	cellular organisms	Bacteria	Verrucomicrobia	unclassified Verrucomicrobia	unclassified Verrucomicrobia (miscellaneous)	Verrucomicrobia bacterium SCGC AAA164-L15
6	cellular organisms	Bacteria	Verrucomicrobia	unclassified Verrucomicrobia	unclassified Verrucomicrobia (miscellaneous)	Verrucomicrobia bacterium RIFCSPHIGHO2_12_FULL_41_10
9	cellular organisms	Bacteria	Verrucomicrobia	unclassified Verrucomicrobia	unclassified Verrucomicrobia (miscellaneous)	Verrucomicrobia bacterium ADurb.Bin122
2	cellular organisms	Bacteria	Verrucomicrobia	unclassified Verrucomicrobia	Methylacidimicrobium	Methylacidimicrobium tartarophylax
9	cellular organisms	Bacteria	Verrucomicrobia	unclassified Verrucomicrobia	unclassified Verrucomicrobia (miscellaneous)	Verrucomicrobia bacterium 61-8
33	cellular organisms	Bacteria	Verrucomicrobia	unclassified Verrucomicrobia	unclassified Verrucomicrobia (miscellaneous)	Verrucomicrobia bacterium ADurb.Bin118
2	cellular organisms	Bacteria	Verrucomicrobia	unclassified Verrucomicrobia
10	cellular organisms	Bacteria	Verrucomicrobia	unclassified Verrucomicrobia	unclassified Verrucomicrobia (miscellaneous)	Verrucomicrobia bacterium TMED71
9	cellular organisms	Bacteria	Verrucomicrobia	unclassified Verrucomicrobia	unclassified Verrucomicrobia (miscellaneous)	Verrucomicrobia bacterium ADurb.Bin345
16	cellular organisms	Bacteria	Verrucomicrobia	unclassified Verrucomicrobia	unclassified Verrucomicrobia (miscellaneous)	Verrucomicrobia bacterium SCGC AAA164-O14
17	cellular organisms	Bacteria	Verrucomicrobia	unclassified Verrucomicrobia	unclassified Verrucomicrobia (miscellaneous)	Verrucomicrobia bacterium LW23
150	cellular organisms	Bacteria	Verrucomicrobia	unclassified Verrucomicrobia	Lentimonas	unclassified Lentimonas
30	cellular organisms	Bacteria	Verrucomicrobia	unclassified Verrucomicrobia	unclassified Verrucomicrobia (miscellaneous)	Verrucomicrobia bacterium ADurb.Bin006
6	cellular organisms	Bacteria	Verrucomicrobia	unclassified Verrucomicrobia	unclassified Verrucomicrobia (miscellaneous)	Verrucomicrobia bacterium TMED40
1843	cellular organisms	Bacteria	Verrucomicrobia	unclassified Verrucomicrobia	unclassified Verrucomicrobia (miscellaneous)	Verrucomicrobia bacterium
5	cellular organisms	Bacteria	Verrucomicrobia	unclassified Verrucomicrobia	unclassified Verrucomicrobia (miscellaneous)	Verrucomicrobia bacterium GWC2_42_7
4	cellular organisms	Bacteria	Verrucomicrobia	unclassified Verrucomicrobia	unclassified Verrucomicrobia (miscellaneous)	Verrucomicrobia bacterium TMED56
6	cellular organisms	Bacteria	Verrucomicrobia	unclassified Verrucomicrobia	unclassified Verrucomicrobia (miscellaneous)	Verrucomicrobia bacterium ADurb.Bin474
5	cellular organisms	Bacteria	Verrucomicrobia	unclassified Verrucomicrobia	unclassified Verrucomicrobia (miscellaneous)	Verrucomicrobia bacterium S94
1	cellular organisms	Bacteria	Verrucomicrobia	unclassified Verrucomicrobia	Lentimonas	unclassified Lentimonas	Lentimonas sp. CC4
73	cellular organisms	Bacteria	Verrucomicrobia	unclassified Verrucomicrobia	unclassified Verrucomicrobia (miscellaneous)
19	cellular organisms	Bacteria	Verrucomicrobia	unclassified Verrucomicrobia	unclassified Verrucomicrobia (miscellaneous)	Verrucomicrobia bacterium RIFCSPLOWO2_12_FULL_64_8
18	cellular organisms	Bacteria	Verrucomicrobia	unclassified Verrucomicrobia	unclassified Verrucomicrobia (miscellaneous)	Verrucomicrobia bacterium IMCC26134
10	cellular organisms	Bacteria	Verrucomicrobia	unclassified Verrucomicrobia	unclassified Verrucomicrobia (miscellaneous)	Verrucomicrobia bacterium Tous-C9LFEB
6	cellular organisms	Bacteria	Verrucomicrobia	unclassified Verrucomicrobia	unclassified Verrucomicrobia (miscellaneous)	Verrucomicrobia bacterium TMED44
12	cellular organisms	Bacteria	Verrucomicrobia	unclassified Verrucomicrobia	unclassified Verrucomicrobia (miscellaneous)	Verrucomicrobia bacterium ADurb.Bin070
10	cellular organisms	Bacteria	Verrucomicrobia	unclassified Verrucomicrobia	unclassified Verrucomicrobia (miscellaneous)	Verrucomicrobia bacterium ADurb.Bin018
32	cellular organisms	Bacteria	Verrucomicrobia	unclassified Verrucomicrobia	unclassified Verrucomicrobia (miscellaneous)	Verrucomicrobia bacterium 12-59-8
7	cellular organisms	Bacteria	Verrucomicrobia	unclassified Verrucomicrobia	unclassified Verrucomicrobia (miscellaneous)	Verrucomicrobia bacterium SCN 57-15
11	cellular organisms	Bacteria	Verrucomicrobia	unclassified Verrucomicrobia	unclassified Verrucomicrobia (miscellaneous)	Verrucomicrobia bacterium GWF2_62_7
19	cellular organisms	Bacteria	Verrucomicrobia	unclassified Verrucomicrobia	unclassified Verrucomicrobia (miscellaneous)	Verrucomicrobia bacterium ADurb.Bin063
5	cellular organisms	Bacteria	Verrucomicrobia	unclassified Verrucomicrobia	unclassified Verrucomicrobia (miscellaneous)	Verrucomicrobia bacterium A1
3	cellular organisms	Bacteria	Verrucomicrobia	unclassified Verrucomicrobia	unclassified Verrucomicrobia (miscellaneous)	Verrucomicrobia bacterium TMED175
1	cellular organisms	Bacteria	Verrucomicrobia	unclassified Verrucomicrobia	unclassified Verrucomicrobia (miscellaneous)	Verrucomicrobia bacterium GWF2_51_19
6	cellular organisms	Bacteria	Verrucomicrobia	unclassified Verrucomicrobia	unclassified Verrucomicrobia (miscellaneous)	Verrucomicrobia bacterium TMED60
4	cellular organisms	Bacteria	Verrucomicrobia	unclassified Verrucomicrobia	unclassified Verrucomicrobia (miscellaneous)	Verrucomicrobia bacterium SCGC AG-212-E04
1	cellular organisms	Bacteria	Verrucomicrobia	Verrucomicrobiae	Verrucomicrobiales	environmental samples	uncultured Verrucomicrobiales bacterium HF0200_39L05
1	cellular organisms	Bacteria	Verrucomicrobia	Verrucomicrobiae	Verrucomicrobiales	environmental samples	uncultured Verrucomicrobiales bacterium HF0130_14P10
1	cellular organisms	Bacteria	Verrucomicrobia	Verrucomicrobiae	Verrucomicrobiales	Akkermansiaceae	Akkermansia	environmental samples	uncultured Akkermansia sp.
3	cellular organisms	Bacteria	Verrucomicrobia	Verrucomicrobiae	Verrucomicrobiales	Verrucomicrobiaceae	Prosthecobacter
3	cellular organisms	Bacteria	Verrucomicrobia	Verrucomicrobiae	Verrucomicrobiales	unclassified Verrucomicrobiales	unclassified Verrucomicrobiales (miscellaneous)	Verrucomicrobiales bacterium 32-60-5
3	cellular organisms	Bacteria	Verrucomicrobia	Verrucomicrobiae	Verrucomicrobiales	Akkermansiaceae	Akkermansia	unclassified Akkermansia
1	cellular organisms	Bacteria	Verrucomicrobia	Verrucomicrobiae	Verrucomicrobiales	Rubritaleaceae	Rubritalea	unclassified Rubritalea	Rubritalea sp. shu-10-MA45-1
1	cellular organisms	Bacteria	Verrucomicrobia	Verrucomicrobiae	Verrucomicrobiales	Akkermansiaceae	Akkermansia	unclassified Akkermansia	Akkermansia sp. BIOML-A43
5	cellular organisms	Bacteria	Verrucomicrobia	Verrucomicrobiae	unclassified Verrucomicrobiae	Verrucomicrobiae bacterium AMD-G2
36	cellular organisms	Bacteria	Verrucomicrobia	Verrucomicrobiae	Verrucomicrobiales	Verrucomicrobiaceae	Prosthecobacter	Prosthecobacter fusiformis
15	cellular organisms	Bacteria	Verrucomicrobia	Verrucomicrobiae	Verrucomicrobiales	Verrucomicrobiaceae	Verrucomicrobium	unclassified Verrucomicrobium	Verrucomicrobium sp. BvORR106
48	cellular organisms	Bacteria	Verrucomicrobia	Verrucomicrobiae	unclassified Verrucomicrobiae	Verrucomicrobiae bacterium Tous-C4TDCM
26	cellular organisms	Bacteria	Verrucomicrobia	Verrucomicrobiae	Verrucomicrobiales
19	cellular organisms	Bacteria	Verrucomicrobia	Verrucomicrobiae	Verrucomicrobiales	Verrucomicrobia subdivision 3	Limisphaera	Limisphaera ngatamarikiensis
19	cellular organisms	Bacteria	Verrucomicrobia	Verrucomicrobiae	Verrucomicrobiales	Verrucomicrobia subdivision 3	Pedosphaera	unclassified Pedosphaera	Pedosphaera sp.
8	cellular organisms	Bacteria	Verrucomicrobia	Verrucomicrobiae	Verrucomicrobiales	unclassified Verrucomicrobiales	unclassified Verrucomicrobiales (miscellaneous)	Verrucomicrobiales bacterium
43	cellular organisms	Bacteria	Verrucomicrobia	Verrucomicrobiae	Verrucomicrobiales	Verrucomicrobiaceae
41	cellular organisms	Bacteria	Verrucomicrobia	Verrucomicrobiae	Verrucomicrobiales	Verrucomicrobiaceae	Phragmitibacter	Phragmitibacter flavus
25	cellular organisms	Bacteria	Verrucomicrobia	Verrucomicrobiae	Verrucomicrobiales	Verrucomicrobiaceae	unclassified Verrucomicrobiaceae	Verrucomicrobiaceae bacterium SCGC AG-212-N21
12	cellular organisms	Bacteria	Verrucomicrobia	Verrucomicrobiae	Verrucomicrobiales	Verrucomicrobiaceae	Verrucomicrobium	Verrucomicrobium spinosum
30	cellular organisms	Bacteria	Verrucomicrobia	Verrucomicrobiae	Verrucomicrobiales	Verrucomicrobiaceae	Prosthecobacter	Prosthecobacter debontii
13	cellular organisms	Bacteria	Verrucomicrobia	Verrucomicrobiae	Verrucomicrobiales	Verrucomicrobiaceae	Verrucomicrobium	unclassified Verrucomicrobium	Verrucomicrobium sp. BvORR034
15	cellular organisms	Bacteria	Verrucomicrobia	Verrucomicrobiae	Verrucomicrobiales	Verrucomicrobiaceae	unclassified Verrucomicrobiaceae
109	cellular organisms	Bacteria	Verrucomicrobia	Verrucomicrobiae	Verrucomicrobiales	Verrucomicrobia subdivision 3	unclassified Verrucomicrobia subdivision 3	Verrucomicrobia subdivision 3 bacterium
24	cellular organisms	Bacteria	Verrucomicrobia	Verrucomicrobiae	Verrucomicrobiales	Verrucomicrobia subdivision 3
34	cellular organisms	Bacteria	Verrucomicrobia	Verrucomicrobiae	Verrucomicrobiales	Verrucomicrobiaceae	Verrucomicrobium
753	cellular organisms	Bacteria	Verrucomicrobia	Verrucomicrobiae	Verrucomicrobiales	Verrucomicrobiaceae	unclassified Verrucomicrobiaceae	Verrucomicrobiaceae bacterium
59	cellular organisms	Bacteria	Verrucomicrobia	Verrucomicrobiae	Verrucomicrobiales	Verrucomicrobiaceae	unclassified Verrucomicrobiaceae	Verrucomicrobiaceae bacterium TMED86
89	cellular organisms	Bacteria	Verrucomicrobia	Verrucomicrobiae	Verrucomicrobiales	Rubritaleaceae	Rubritalea	Rubritalea squalenifaciens
1	cellular organisms	Bacteria	Verrucomicrobia	Verrucomicrobiae	Verrucomicrobiales	environmental samples	uncultured Verrucomicrobiales bacterium HF4000_13K17
77	cellular organisms	Bacteria	Verrucomicrobia	Verrucomicrobiae	Verrucomicrobiales	unclassified Verrucomicrobiales	unclassified Verrucomicrobiales (miscellaneous)	Verrucomicrobiales bacterium VVV1
14	cellular organisms	Bacteria	Verrucomicrobia	Verrucomicrobiae	Verrucomicrobiales	Verrucomicrobiaceae	Verrucomicrobium	unclassified Verrucomicrobium	Verrucomicrobium sp. GAS474
31	cellular organisms	Bacteria	Verrucomicrobia	Verrucomicrobiae	Verrucomicrobiales	Verrucomicrobiaceae	Roseimicrobium
28	cellular organisms	Bacteria	Verrucomicrobia	Verrucomicrobiae
59	cellular organisms	Bacteria	Verrucomicrobia	Verrucomicrobiae	Verrucomicrobiales	Verrucomicrobiaceae	Brevifollis	Brevifollis gellanilyticus
15	cellular organisms	Bacteria	Verrucomicrobia	Verrucomicrobiae	Verrucomicrobiales	Verrucomicrobiaceae	unclassified Verrucomicrobiaceae	Verrucomicrobiaceae bacterium TMED76
40	cellular organisms	Bacteria	Verrucomicrobia	Verrucomicrobiae	Verrucomicrobiales	Verrucomicrobia subdivision 3	Pedosphaera	unclassified Pedosphaera	Pedosphaera sp. Tous-C6FEB
78	cellular organisms	Bacteria	Verrucomicrobia	Verrucomicrobiae	Verrucomicrobiales	Verrucomicrobiaceae	Haloferula	unclassified Haloferula	Haloferula sp. BvORR071
3	cellular organisms	Bacteria	Verrucomicrobia	Verrucomicrobiae	Verrucomicrobiales	Akkermansiaceae	Akkermansia	Akkermansia glycaniphila
42	cellular organisms	Bacteria	Verrucomicrobia	Verrucomicrobiae	Verrucomicrobiales	Verrucomicrobiaceae	Roseimicrobium	unclassified Roseimicrobium	Roseimicrobium sp. ORNL1
9	cellular organisms	Bacteria	Verrucomicrobia	Verrucomicrobiae	Verrucomicrobiales	Verrucomicrobiaceae	Verrucomicrobium	unclassified Verrucomicrobium
40	cellular organisms	Bacteria	Verrucomicrobia	Verrucomicrobiae	unclassified Verrucomicrobiae
11	cellular organisms	Bacteria	Verrucomicrobia	Verrucomicrobiae	Verrucomicrobiales	Rubritaleaceae	Rubritalea
85	cellular organisms	Bacteria	Verrucomicrobia	Verrucomicrobiae	Verrucomicrobiales	Verrucomicrobia subdivision 3	Pedosphaera	Pedosphaera parvula
33	cellular organisms	Bacteria	Verrucomicrobia	Verrucomicrobiae	Verrucomicrobiales	unclassified Verrucomicrobiales	unclassified Verrucomicrobiales (miscellaneous)	Verrucomicrobiales bacterium T37
55	cellular organisms	Bacteria	Verrucomicrobia	Verrucomicrobiae	Verrucomicrobiales	Verrucomicrobiaceae	Roseimicrobium	Roseimicrobium gellanilyticum
70	cellular organisms	Bacteria	Verrucomicrobia	Verrucomicrobiae	Verrucomicrobiales	Verrucomicrobiaceae	Luteolibacter	unclassified Luteolibacter	Luteolibacter sp. G-1-1-1
8	cellular organisms	Bacteria	Verrucomicrobia	Verrucomicrobiae	Verrucomicrobiales	Verrucomicrobiaceae	unclassified Verrucomicrobiaceae	Verrucomicrobiaceae bacterium TMED137
41	cellular organisms	Bacteria	Verrucomicrobia	Verrucomicrobiae	Verrucomicrobiales	Rubritaleaceae	Rubritalea	Rubritalea marina
42	cellular organisms	Bacteria	Verrucomicrobia	Verrucomicrobiae	unclassified Verrucomicrobiae	Verrucomicrobiae bacterium Tous-C2TDCM
3	cellular organisms	Bacteria	Verrucomicrobia	Verrucomicrobiae	Verrucomicrobiales	Verrucomicrobia subdivision 3	Pedosphaera	Pedosphaera parvula	Pedosphaera parvula Ellin514
1	cellular organisms	Bacteria	Verrucomicrobia	Verrucomicrobiae	Verrucomicrobiales	Verrucomicrobia subdivision 3	Pedosphaera	unclassified Pedosphaera
2	cellular organisms	Bacteria	Verrucomicrobia	Verrucomicrobiae	Verrucomicrobiales	Verrucomicrobiaceae	Verrucomicrobium	unclassified Verrucomicrobium	Verrucomicrobium sp. 3C
8	cellular organisms	Bacteria	Verrucomicrobia	Verrucomicrobiae	Verrucomicrobiales	Akkermansiaceae	Akkermansia	Akkermansia muciniphila
11	cellular organisms	Bacteria	Verrucomicrobia	Verrucomicrobiae	Verrucomicrobiales	Verrucomicrobiaceae	Roseibacillus	unclassified Roseibacillus	Roseibacillus sp. TMED18
47	cellular organisms	Bacteria	Verrucomicrobia	Verrucomicrobiae	unclassified Verrucomicrobiae	Verrucomicrobiae bacterium Tous-C5FEB
63	cellular organisms	Bacteria	Verrucomicrobia	Verrucomicrobiae	Verrucomicrobiales	Rubritaleaceae	Rubritalea	Rubritalea profundi
10	cellular organisms	Bacteria	Verrucomicrobia	Verrucomicrobiae	Verrucomicrobiales	Akkermansiaceae	Akkermansia
36	cellular organisms	Bacteria	Verrucomicrobia	Verrucomicrobiae	unclassified Verrucomicrobiae	Verrucomicrobiae bacterium DG1235
357	cellular organisms	Bacteria	Verrucomicrobia
42	cellular organisms	Bacteria	unclassified Terrabacteria group	Terrabacteria group bacterium ANGP1
1	cellular organisms	Bacteria	unclassified Terrabacteria group	Thermobaculum	environmental samples	uncultured Thermobaculum sp.
17	cellular organisms	Bacteria	unclassified Terrabacteria group	Thermobaculum	Thermobaculum terrenum
3	cellular organisms	Bacteria	unclassified PVC group	PVC group bacterium (ex Bugula neritina AB1)
1	cellular organisms	Bacteria	Patescibacteria group	Microgenomates group	unclassified Microgenomates group	unclassified Microgenomates group (miscellaneous)	Microgenomates group bacterium GW2011_GWA2_40_6
1	cellular organisms	Bacteria	Patescibacteria group	Microgenomates group	Candidatus Pacebacteria	Candidatus Pacebacteria bacterium CG10_big_fil_rev_8_21_14_0_10_45_6
1	cellular organisms	Bacteria	Patescibacteria group	Parcubacteria group	Candidatus Moranbacteria	Candidatus Moranbacteria bacterium CG23_combo_of_CG06-09_8_20_14_all_39_10
1	cellular organisms	Bacteria	Candidatus Rokubacteria	Candidatus Rokubacteria bacterium 13_2_20CM_69_15_1
1	cellular organisms	Bacteria	Patescibacteria group	Parcubacteria group	Candidatus Moranbacteria	Candidatus Moranbacteria bacterium CG17_big_fil_post_rev_8_21_14_2_50_41_107
1	cellular organisms	Bacteria	Patescibacteria group	Microgenomates group	unclassified Microgenomates group	Candidatus Chazhemtobacteraceae	Candidatus Chazhemtobacterium	Candidatus Chazhemtobacterium aquaticus
1	cellular organisms	Bacteria	Patescibacteria group	Parcubacteria group	Candidatus Yanofskybacteria	Candidatus Yanofskybacteria bacterium CG10_big_fil_rev_8_21_14_0_10_36_16
1	cellular organisms	Bacteria	Candidatus Berkelbacteria	Berkelbacteria bacterium GW2011_GWE1_39_12
1	cellular organisms	Bacteria	candidate division WWE3	candidate division WWE3 bacterium CG08_land_8_20_14_0_20_41_10
1	cellular organisms	Bacteria	Patescibacteria group	Parcubacteria group	Candidatus Portnoybacteria	Candidatus Portnoybacteria bacterium RBG_19FT_COMBO_36_7
1	cellular organisms	Bacteria	Patescibacteria group	Parcubacteria group	Candidatus Magasanikbacteria	Candidatus Magasanikbacteria bacterium RIFOXYB1_FULL_40_15
1	cellular organisms	Bacteria	Patescibacteria group	Microgenomates group	Candidatus Curtissbacteria	Candidatus Curtissbacteria bacterium RBG_13_40_7
1	cellular organisms	Bacteria	Candidatus Saccharibacteria	unclassified Saccharibacteria	Candidatus Saccharibacteria bacterium RIFCSPHIGHO2_12_FULL_48_21
1	cellular organisms	Bacteria	Candidatus Peregrinibacteria	unclassified Candidatus Peregrinibacteria	Candidatus Peregrinibacteria bacterium GW2011_GWA2_44_7
1	cellular organisms	Bacteria	Patescibacteria group	Parcubacteria group	Candidatus Buchananbacteria	Candidatus Buchananbacteria bacterium RIFCSPHIGHO2_01_FULL_39_8
1	cellular organisms	Bacteria	Patescibacteria group	Parcubacteria group	unclassified Parcubacteria group	Parcubacteria group bacterium
1	cellular organisms	Bacteria	Patescibacteria group	Parcubacteria group	Candidatus Zambryskibacteria	Candidatus Zambryskibacteria bacterium RIFOXYD1_FULL_39_35
1	cellular organisms	Bacteria	Patescibacteria group	Parcubacteria group	Candidatus Vogelbacteria	Candidatus Vogelbacteria bacterium CG22_combo_CG10-13_8_21_14_all_37_9
1	cellular organisms	Bacteria	Candidatus Saccharibacteria	unclassified Saccharibacteria	Candidatus Saccharibacteria bacterium FS14P
1	cellular organisms	Bacteria	Patescibacteria group	Parcubacteria group	Candidatus Nealsonbacteria	Candidatus Nealsonbacteria bacterium RIFCSPLOWO2_12_FULL_39_31
1	cellular organisms	Bacteria	Patescibacteria group	Parcubacteria group	unclassified Parcubacteria group	Parcubacteria group bacterium GW2011_GWA2_46_39
1	cellular organisms	Bacteria	Patescibacteria group	Parcubacteria group	Candidatus Uhrbacteria	Candidatus Uhrbacteria bacterium GW2011_GWC2_53_7
1	cellular organisms	Bacteria	Candidatus Coatesbacteria
1	cellular organisms	Bacteria	Patescibacteria group	Parcubacteria group	Candidatus Kaiserbacteria	Candidatus Kaiserbacteria bacterium RIFCSPHIGHO2_01_FULL_49_13
1	cellular organisms	Bacteria	Patescibacteria group	Parcubacteria group	Candidatus Yonathbacteria	Candidatus Yonathbacteria bacterium RIFOXYD1_FULL_52_36
1	cellular organisms	Bacteria	Patescibacteria group	Microgenomates group	Candidatus Gottesmanbacteria	Candidatus Gottesmanbacteria bacterium RIFCSPLOWO2_01_FULL_49_10
1	cellular organisms	Bacteria	Patescibacteria group	Parcubacteria group	Candidatus Ryanbacteria	Candidatus Ryanbacteria bacterium RIFCSPLOWO2_01_FULL_48_26
1	cellular organisms	Bacteria	Candidatus Rokubacteria	Candidatus Rokubacteria bacterium RIFCSPLOWO2_12_FULL_73_47
1	cellular organisms	Bacteria	Patescibacteria group	Parcubacteria group	Candidatus Parcubacteria	unclassified Parcubacteria	Parcubacteria bacterium C7867-006
1	cellular organisms	Bacteria	Candidatus Sumerlaeota	Candidatus Sumerlaeia	Candidatus Sumerlaeales	Candidatus Sumerlaeaceae	Candidatus Sumerlaea	Candidatus Sumerlaea chitinovorans
3	cellular organisms	Bacteria	Candidatus Aerophobetes	unclassified Aerophobetes
1	cellular organisms	Bacteria	Patescibacteria group	Parcubacteria group	Candidatus Kaiserbacteria	Candidatus Kaiserbacteria bacterium GW2011_GWC2_49_12
1	cellular organisms	Bacteria	Patescibacteria group	Parcubacteria group	Candidatus Magasanikbacteria	Candidatus Magasanikbacteria bacterium GW2011_GWA2_43_9
1	cellular organisms	Bacteria	Patescibacteria group	Parcubacteria group	Candidatus Nealsonbacteria	Candidatus Nealsonbacteria bacterium CG18_big_fil_WC_8_21_14_2_50_37_10
1	cellular organisms	Bacteria	Patescibacteria group	Parcubacteria group	Candidatus Portnoybacteria	Candidatus Portnoybacteria bacterium CG10_big_fil_rev_8_21_14_0_10_38_18
1	cellular organisms	Bacteria	Patescibacteria group	Parcubacteria group	Candidatus Magasanikbacteria	Candidatus Magasanikbacteria bacterium CG10_big_fil_rev_8_21_14_0_10_40_10
1	cellular organisms	Bacteria	candidate division WWE3	candidate division WWE3 bacterium RBG_13_37_7
1	cellular organisms	Bacteria	Patescibacteria group	Microgenomates group	Candidatus Woesebacteria	Candidatus Woesebacteria bacterium RIFOXYC1_FULL_43_18
1	cellular organisms	Bacteria	Candidatus Peregrinibacteria	unclassified Candidatus Peregrinibacteria	Candidatus Peregrinibacteria bacterium Greene1014_49
1	cellular organisms	Bacteria	Candidatus Peregrinibacteria	unclassified Candidatus Peregrinibacteria	Candidatus Peregrinibacteria bacterium GW2011_GWC2_33_13
1	cellular organisms	Bacteria	Patescibacteria group	Parcubacteria group	Candidatus Nealsonbacteria	Candidatus Nealsonbacteria bacterium RBG_13_37_56
1	cellular organisms	Bacteria	Patescibacteria group	Parcubacteria group	unclassified Parcubacteria group	Parcubacteria group bacterium GW2011_GWB1_49_7
1	cellular organisms	Bacteria	Patescibacteria group	Microgenomates group	Candidatus Woesebacteria	Candidatus Woesebacteria bacterium GW2011_GWC1_43_10b
1	cellular organisms	Bacteria	Patescibacteria group	Microgenomates group	Candidatus Gottesmanbacteria	Candidatus Gottesmanbacteria bacterium GW2011_GWA2_47_9
1	cellular organisms	Bacteria	Patescibacteria group	Parcubacteria group	Candidatus Wolfebacteria	Candidatus Wolfebacteria bacterium
1	cellular organisms	Bacteria	Patescibacteria group	Parcubacteria group	Candidatus Yanofskybacteria	Candidatus Yanofskybacteria bacterium RIFCSPLOWO2_01_FULL_49_25
2	cellular organisms	Bacteria	candidate division CPR2
1	cellular organisms	Bacteria	Patescibacteria group	Parcubacteria group	Candidatus Taylorbacteria	Candidatus Taylorbacteria bacterium RIFCSPLOWO2_12_FULL_44_15c
1	cellular organisms	Bacteria	Patescibacteria group	Parcubacteria group	Candidatus Kaiserbacteria	Candidatus Kaiserbacteria bacterium RIFCSPLOWO2_01_FULL_52_12b
1	cellular organisms	Bacteria	Patescibacteria group	Parcubacteria group	Candidatus Nomurabacteria	Candidatus Nomurabacteria bacterium RIFCSPHIGHO2_01_FULL_39_9
5	cellular organisms	Bacteria	Patescibacteria group	Parcubacteria group	Candidatus Yanofskybacteria
2	cellular organisms	Bacteria	Patescibacteria group	Microgenomates group	Candidatus Roizmanbacteria	Candidatus Roizmanbacteria bacterium CG10_big_fil_rev_8_21_14_0_10_45_7
4	cellular organisms	Bacteria	Patescibacteria group	Parcubacteria group	Candidatus Kaiserbacteria	Candidatus Kaiserbacteria bacterium RIFCSPHIGHO2_01_FULL_55_17
1	cellular organisms	Bacteria	Patescibacteria group	Microgenomates group	unclassified Microgenomates group	unclassified Microgenomates group (miscellaneous)	Microgenomates group bacterium Gr01-1014_80
1	cellular organisms	Bacteria	Patescibacteria group	Microgenomates group	Candidatus Roizmanbacteria	Candidatus Roizmanbacteria bacterium CG_4_10_14_0_8_um_filter_33_9
1	cellular organisms	Bacteria	Patescibacteria group	Parcubacteria group	Candidatus Brennerbacteria
1	cellular organisms	Bacteria	Patescibacteria group	Parcubacteria group	Candidatus Moranbacteria	Candidatus Moranbacteria bacterium CG23_combo_of_CG06-09_8_20_14_all_35_22
1	cellular organisms	Bacteria	Patescibacteria group	Parcubacteria group	Candidatus Kaiserbacteria	Candidatus Kaiserbacteria bacterium RIFCSPHIGHO2_02_FULL_49_11
2	cellular organisms	Bacteria	Patescibacteria group	Microgenomates group	Candidatus Gottesmanbacteria	Candidatus Gottesmanbacteria bacterium RIFCSPLOWO2_01_FULL_39_12b
1	cellular organisms	Bacteria	Patescibacteria group	Parcubacteria group	Candidatus Buchananbacteria	Candidatus Buchananbacteria bacterium RIFCSPLOWO2_01_FULL_56_15
3	cellular organisms	Bacteria	Candidatus Saccharibacteria	unclassified Saccharibacteria	Candidatus Saccharibacteria bacterium 32-49-12
1	cellular organisms	Bacteria	Candidatus Desantisbacteria	Candidatus Desantisbacteria bacterium CG_4_8_14_3_um_filter_40_12
2	cellular organisms	Bacteria	Patescibacteria group	Parcubacteria group	Candidatus Uhrbacteria	Candidatus Uhrbacteria bacterium CG10_big_fil_rev_8_21_14_0_10_48_11
1	cellular organisms	Bacteria	Patescibacteria group	Parcubacteria group	unclassified Parcubacteria group	Parcubacteria group bacterium GW2011_GWA2_45_15
1	cellular organisms	Bacteria	Candidatus Saccharibacteria	TM7 phylum sp. oral taxon 488
1	cellular organisms	Bacteria	Patescibacteria group	Parcubacteria group	Candidatus Magasanikbacteria	Candidatus Magasanikbacteria bacterium RIFCSPHIGHO2_02_FULL_50_9b
4	cellular organisms	Bacteria	Candidatus Aminicenantes	unclassified Aminicenantes	Candidatus Aminicenantes bacterium RBG_19FT_COMBO_58_17
1	cellular organisms	Bacteria	Patescibacteria group	Parcubacteria group	unclassified Parcubacteria group	Parcubacteria group bacterium GW2011_GWA2_43_17
1	cellular organisms	Bacteria	candidate division WWE3	candidate division WWE3 bacterium RIFCSPLOWO2_01_FULL_37_15
2	cellular organisms	Bacteria	Patescibacteria group	Parcubacteria group	Candidatus Azambacteria
1	cellular organisms	Bacteria	Patescibacteria group	Microgenomates group	Candidatus Levybacteria	Candidatus Levybacteria bacterium CG_4_10_14_0_2_um_filter_35_8
1	cellular organisms	Bacteria	Candidatus Doudnabacteria	Candidatus Doudnabacteria bacterium RIFCSPHIGHO2_01_52_17
1	cellular organisms	Bacteria	Candidatus Rokubacteria	Candidatus Rokubacteria bacterium 13_2_20CM_2_64_8
1	cellular organisms	Bacteria	Patescibacteria group	Parcubacteria group	Candidatus Parcubacteria	unclassified Parcubacteria	Parcubacteria bacterium 33_209
1	cellular organisms	Bacteria	Patescibacteria group	Parcubacteria group	Candidatus Zambryskibacteria	Candidatus Zambryskibacteria bacterium CG10_big_fil_rev_8_21_14_0_10_42_12
1	cellular organisms	Bacteria	Candidatus Peregrinibacteria	Candidatus Peribacteria	unclassified Candidatus Peribacteria	Candidatus Peribacteria bacterium RIFOXYD2_FULL_58_15
1	cellular organisms	Bacteria	Patescibacteria group	Parcubacteria group	Candidatus Ryanbacteria	Candidatus Ryanbacteria bacterium RIFCSPHIGHO2_01_FULL_48_27
1	cellular organisms	Bacteria	Patescibacteria group	Parcubacteria group	unclassified Parcubacteria group	Parcubacteria group bacterium LiPW_30
1	cellular organisms	Bacteria	Candidatus Peregrinibacteria	unclassified Candidatus Peregrinibacteria	Candidatus Peregrinibacteria bacterium CG_4_9_14_0_2_um_filter_53_11
1	cellular organisms	Bacteria	Patescibacteria group	Parcubacteria group	Candidatus Nomurabacteria	Candidatus Nomurabacteria bacterium RIFCSPLOWO2_01_FULL_40_18
1	cellular organisms	Bacteria	Patescibacteria group	Parcubacteria group	unclassified Parcubacteria group	Parcubacteria group bacterium GW2011_GWB1_43_8b
1	cellular organisms	Bacteria	Patescibacteria group	Microgenomates group	Candidatus Blackburnbacteria	Candidatus Blackburnbacteria bacterium RIFCSPHIGHO2_12_FULL_41_13b
1	cellular organisms	Bacteria	Patescibacteria group	Parcubacteria group	unclassified Parcubacteria group	Parcubacteria group bacterium ADurb.Bin016
2	cellular organisms	Bacteria	Patescibacteria group	Parcubacteria group	unclassified Parcubacteria group	Parcubacteria group bacterium Gr01-1014_31
1	cellular organisms	Bacteria	Patescibacteria group	Parcubacteria group	unclassified Parcubacteria group	Parcubacteria group bacterium Athens0714_12
1	cellular organisms	Bacteria	candidate division TA06	candidate division TA06 bacterium 34_109
4	cellular organisms	Bacteria	Patescibacteria group	Parcubacteria group	Candidatus Nealsonbacteria	Candidatus Nealsonbacteria bacterium
1	cellular organisms	Bacteria	Patescibacteria group	Parcubacteria group	Candidatus Giovannonibacteria	Candidatus Giovannonibacteria bacterium RIFCSPHIGHO2_02_FULL_46_20
1	cellular organisms	Bacteria	Patescibacteria group	Microgenomates group	Candidatus Roizmanbacteria	Candidatus Roizmanbacteria bacterium CG_4_10_14_0_2_um_filter_39_12
2	cellular organisms	Bacteria	Patescibacteria group	Microgenomates group	Candidatus Pacebacteria	Candidatus Pacebacteria bacterium CG10_big_fil_rev_8_21_14_0_10_42_12
2	cellular organisms	Bacteria	Patescibacteria group	Parcubacteria group	Candidatus Uhrbacteria	Candidatus Uhrbacteria bacterium RIFCSPHIGHO2_01_FULL_63_20
1	cellular organisms	Bacteria	candidate division WOR-3	candidate division WOR-3 bacterium
1	cellular organisms	Bacteria	Candidatus Peregrinibacteria	unclassified Candidatus Peregrinibacteria	Candidatus Peregrinibacteria bacterium GW2011_GWA2_47_7
1	cellular organisms	Bacteria	Candidatus Saccharibacteria	unclassified Saccharibacteria	Candidatus Saccharibacteria bacterium 32-49-10
8	cellular organisms	Bacteria	Patescibacteria group	Parcubacteria group	Candidatus Magasanikbacteria
2	cellular organisms	Bacteria	Patescibacteria group	Parcubacteria group	Candidatus Kaiserbacteria	Candidatus Kaiserbacteria bacterium CG10_big_fil_rev_8_21_14_0_10_49_17
1	cellular organisms	Bacteria	candidate division WWE3	candidate division WWE3 bacterium RIFCSPLOWO2_12_FULL_36_10
1	cellular organisms	Bacteria	Patescibacteria group	Parcubacteria group	Candidatus Colwellbacteria
3	cellular organisms	Bacteria	Candidatus Doudnabacteria	Candidatus Doudnabacteria bacterium RIFCSPHIGHO2_01_FULL_46_14
3	cellular organisms	Bacteria	Patescibacteria group	Parcubacteria group	unclassified Parcubacteria group	Parcubacteria group bacterium Gr01-1014_56
1	cellular organisms	Bacteria	Candidatus Rokubacteria	Candidatus Rokubacteria bacterium RIFCSPHIGHO2_02_FULL_69_13
1	cellular organisms	Bacteria	Patescibacteria group	Parcubacteria group	Candidatus Terrybacteria	Candidatus Terrybacteria bacterium CG10_big_fil_rev_8_21_14_0_10_41_10
1	cellular organisms	Bacteria	Patescibacteria group	Microgenomates group	Candidatus Amesbacteria	Candidatus Amesbacteria bacterium GW2011_GWC1_46_24
2	cellular organisms	Bacteria	candidate division WWE3	candidate division WWE3 bacterium
4	cellular organisms	Bacteria	Candidatus Aminicenantes	unclassified Aminicenantes	Candidatus Aminicenantes bacterium RBG_16_66_30
2	cellular organisms	Bacteria	Patescibacteria group	Parcubacteria group	Candidatus Uhrbacteria	Candidatus Uhrbacteria bacterium RIFCSPLOWO2_02_FULL_48_12
1	cellular organisms	Bacteria	Patescibacteria group	Parcubacteria group	unclassified Parcubacteria group	Parcubacteria group bacterium GW2011_GWA2_47_8
1	cellular organisms	Bacteria	Patescibacteria group	Parcubacteria group	Candidatus Falkowbacteria	Candidatus Falkowbacteria bacterium CG10_big_fil_rev_8_21_14_0_10_37_14
1	cellular organisms	Bacteria	Candidatus Saccharibacteria	unclassified Saccharibacteria	Candidatus Saccharibacteria bacterium SW_7_54_9
2	cellular organisms	Bacteria	Candidatus Peregrinibacteria	unclassified Candidatus Peregrinibacteria	Candidatus Peregrinibacteria bacterium CG10_big_fil_rev_8_21_14_0_10_49_10
1	cellular organisms	Bacteria	Patescibacteria group	Parcubacteria group	unclassified Parcubacteria group	Parcubacteria group bacterium GW2011_GWB1_56_8
1	cellular organisms	Bacteria	Candidatus Firestonebacteria	Candidatus Firestonebacteria bacterium RIFOXYA2_FULL_40_8
1	cellular organisms	Bacteria	Patescibacteria group	Microgenomates group	unclassified Microgenomates group	unclassified Microgenomates group (miscellaneous)	Microgenomates group bacterium Gr01-1014_16
1	cellular organisms	Bacteria	Patescibacteria group	Parcubacteria group	unclassified Parcubacteria group	Parcubacteria group bacterium GW2011_GWA1_Parcubacteria_45_10
2	cellular organisms	Bacteria	Candidatus Aminicenantes
2	cellular organisms	Bacteria	Patescibacteria group	Parcubacteria group	Candidatus Parcubacteria	unclassified Parcubacteria	Parcubacteria bacterium DG_74_2
1	cellular organisms	Bacteria	Patescibacteria group	Parcubacteria group	Candidatus Falkowbacteria	Candidatus Falkowbacteria bacterium CG10_big_fil_rev_8_21_14_0_10_39_11
1	cellular organisms	Bacteria	Patescibacteria group	Candidatus Gracilibacteria	unclassified Candidatus Gracilibacteria	Candidatus Gracilibacteria bacterium GN02-873
1	cellular organisms	Bacteria	Candidatus Schekmanbacteria	Candidatus Schekmanbacteria bacterium RIFCSPLOWO2_02_FULL_38_14
1	cellular organisms	Bacteria	Patescibacteria group	Microgenomates group	unclassified Microgenomates group	unclassified Microgenomates group (miscellaneous)	Microgenomates group bacterium RBG_19FT_COMBO_39_10
4	cellular organisms	Bacteria	Candidatus Dadabacteria	Candidatus Dadabacteria bacterium CSP1-2
1	cellular organisms	Bacteria	Patescibacteria group	Microgenomates group	Candidatus Gottesmanbacteria	Candidatus Gottesmanbacteria bacterium RIFCSPHIGHO2_01_FULL_42_12
1	cellular organisms	Bacteria	Patescibacteria group	Parcubacteria group	Candidatus Azambacteria	Candidatus Azambacteria bacterium RIFCSPHIGHO2_01_FULL_40_24
1	cellular organisms	Bacteria	Patescibacteria group	Parcubacteria group	Candidatus Campbellbacteria
1	cellular organisms	Bacteria	Patescibacteria group	Parcubacteria group	Candidatus Nomurabacteria	Candidatus Nomurabacteria bacterium GW2011_GWB1_43_19
1	cellular organisms	Bacteria	Patescibacteria group	Microgenomates group	Candidatus Levybacteria	Candidatus Levybacteria bacterium CG10_big_fil_rev_8_21_14_0_10_35_13
2	cellular organisms	Bacteria	Patescibacteria group	Parcubacteria group	unclassified Parcubacteria group	Parcubacteria group bacterium CG11_big_fil_rev_8_21_14_0_20_39_22
2	cellular organisms	Bacteria	Patescibacteria group	Parcubacteria group	Candidatus Yanofskybacteria	Candidatus Yanofskybacteria bacterium RIFCSPHIGHO2_01_FULL_41_21
2	cellular organisms	Bacteria	Patescibacteria group	Parcubacteria group	Candidatus Kaiserbacteria	Candidatus Kaiserbacteria bacterium RIFCSPHIGHO2_01_FULL_48_10
1	cellular organisms	Bacteria	Patescibacteria group	Microgenomates group	Candidatus Levybacteria	Candidatus Levybacteria bacterium RIFCSPLOWO2_02_FULL_37_11
1	cellular organisms	Bacteria	Patescibacteria group	Parcubacteria group	Candidatus Magasanikbacteria	Candidatus Magasanikbacteria bacterium GW2011_GWC2_45_8
1	cellular organisms	Bacteria	Patescibacteria group	Parcubacteria group	Candidatus Falkowbacteria	Candidatus Falkowbacteria bacterium CG11_big_fil_rev_8_21_14_0_20_39_10
1	cellular organisms	Bacteria	Candidatus Saccharibacteria	unclassified Saccharibacteria	Candidatus Saccharibacteria bacterium RIFCSPHIGHO2_12_FULL_49_19
1	cellular organisms	Bacteria	Candidatus Aminicenantes	unclassified Aminicenantes	Candidatus Aminicenantes bacterium ADurb.Bin508
1	cellular organisms	Bacteria	Patescibacteria group	Parcubacteria group	Candidatus Nomurabacteria	Candidatus Nomurabacteria bacterium RIFCSPHIGHO2_01_FULL_40_12
1	cellular organisms	Bacteria	Patescibacteria group	Parcubacteria group	Candidatus Harrisonbacteria	Candidatus Harrisonbacteria bacterium RIFCSPHIGHO2_02_FULL_42_16
1	cellular organisms	Bacteria	Patescibacteria group	Parcubacteria group	Candidatus Nomurabacteria	Candidatus Nomurabacteria bacterium RIFCSPHIGHO2_02_FULL_38_15
1	cellular organisms	Bacteria	Patescibacteria group	Parcubacteria group	Candidatus Tagabacteria	Candidatus Tagabacteria bacterium CG10_big_fil_rev_8_21_14_0_10_40_13
1	cellular organisms	Bacteria	Candidatus Peregrinibacteria	Candidatus Peribacteria	unclassified Candidatus Peribacteria	Candidatus Peribacteria bacterium RIFCSPHIGHO2_02_FULL_51_15
3	cellular organisms	Bacteria	Patescibacteria group	Parcubacteria group	unclassified Parcubacteria group	Parcubacteria group bacterium GW2011_GWA2_38_13
2	cellular organisms	Bacteria	Candidatus Rokubacteria	Candidatus Rokubacteria bacterium 13_1_20CM_4_70_14
3	cellular organisms	Bacteria	candidate division WWE3	candidate division WWE3 bacterium RIFCSPHIGHO2_01_FULL_42_13
4	cellular organisms	Bacteria	Patescibacteria group	Microgenomates group	Candidatus Gottesmanbacteria	Candidatus Gottesmanbacteria bacterium GW2011_GWB1_49_7
1	cellular organisms	Bacteria	Patescibacteria group	Parcubacteria group	unclassified Parcubacteria group	Parcubacteria group bacterium 21-58-10
1	cellular organisms	Bacteria	Patescibacteria group	Microgenomates group	Candidatus Daviesbacteria	Candidatus Daviesbacteria bacterium RIFCSPLOWO2_01_FULL_37_10
4	cellular organisms	Bacteria	Candidatus Schekmanbacteria
5	cellular organisms	Bacteria	Patescibacteria group	Parcubacteria group	Candidatus Parcubacteria	unclassified Parcubacteria	Parcubacteria bacterium C7867-001
1	cellular organisms	Bacteria	Candidatus Peregrinibacteria	unclassified Candidatus Peregrinibacteria	Candidatus Peregrinibacteria bacterium CG22_combo_CG10-13_8_21_14_all_49_11
5	cellular organisms	Bacteria	Patescibacteria group	Parcubacteria group	Candidatus Kaiserbacteria	Candidatus Kaiserbacteria bacterium RIFCSPHIGHO2_01_FULL_56_24
1	cellular organisms	Bacteria	Patescibacteria group	Microgenomates group	Candidatus Gottesmanbacteria	Candidatus Gottesmanbacteria bacterium RBG_16_52_11
1	cellular organisms	Bacteria	Candidatus Glassbacteria
4	cellular organisms	Bacteria	Candidatus Hydrothermae	unclassified candidate division EM 3	Candidatus Hydrothermae bacterium
3	cellular organisms	Bacteria	Candidatus Aminicenantes	unclassified Aminicenantes	Candidatus Aminicenantes bacterium RBG_13_64_14
3	cellular organisms	Bacteria	candidate division WOR-3	candidate division WOR-3 bacterium JGI_Cruoil_03_51_56
1	cellular organisms	Bacteria	Patescibacteria group	Parcubacteria group	Candidatus Yonathbacteria	Candidatus Yonathbacteria bacterium RIFCSPHIGHO2_01_FULL_51_10
4	cellular organisms	Bacteria	Patescibacteria group	Parcubacteria group	Candidatus Uhrbacteria	Candidatus Uhrbacteria bacterium GW2011_GWF2_39_13
1	cellular organisms	Bacteria	Patescibacteria group	Parcubacteria group	Candidatus Nealsonbacteria	Candidatus Nealsonbacteria bacterium CG11_big_fil_rev_8_21_14_0_20_35_11
1	cellular organisms	Bacteria	candidate division WS5	candidate division WS5 bacterium
3	cellular organisms	Bacteria	Patescibacteria group	Parcubacteria group	Candidatus Kaiserbacteria	Candidatus Kaiserbacteria bacterium CG10_big_fil_rev_8_21_14_0_10_44_10
2	cellular organisms	Bacteria	Patescibacteria group	Candidatus Gracilibacteria	unclassified Candidatus Gracilibacteria	Candidatus Gracilibacteria bacterium HOT-871
1	cellular organisms	Bacteria	Patescibacteria group	Parcubacteria group	Candidatus Kaiserbacteria	Candidatus Kaiserbacteria bacterium GWA2_50_9
1	cellular organisms	Bacteria	Patescibacteria group	Candidatus Gracilibacteria	unclassified Candidatus Gracilibacteria	Candidatus Gracilibacteria bacterium CG17_big_fil_post_rev_8_21_14_2_50_48_13
2	cellular organisms	Bacteria	Patescibacteria group	Parcubacteria group	Candidatus Harrisonbacteria	Candidatus Harrisonbacteria bacterium CG10_big_fil_rev_8_21_14_0_10_45_28
2	cellular organisms	Bacteria	Patescibacteria group	Parcubacteria group	Candidatus Uhrbacteria	Candidatus Uhrbacteria bacterium CG22_combo_CG10-13_8_21_14_all_47_17
1	cellular organisms	Bacteria	Patescibacteria group	Parcubacteria group	Candidatus Moranbacteria	Candidatus Moranbacteria bacterium RIFCSPHIGHO2_01_FULL_54_31
2	cellular organisms	Bacteria	Candidatus Glassbacteria	Candidatus Glassbacteria bacterium RBG_16_58_8
3	cellular organisms	Bacteria	candidate division TA06	candidate division TA06 bacterium ADurb.Bin417
1	cellular organisms	Bacteria	Candidatus Desantisbacteria	Candidatus Desantisbacteria bacterium CG_4_9_14_3_um_filter_40_11
1	cellular organisms	Bacteria	Patescibacteria group	Parcubacteria group	Candidatus Liptonbacteria	Candidatus Liptonbacteria bacterium RIFCSPLOWO2_12_FULL_60_15
1	cellular organisms	Bacteria	Patescibacteria group	Parcubacteria group	unclassified Parcubacteria group	Parcubacteria group bacterium Athens1014_26
1	cellular organisms	Bacteria	Patescibacteria group	Parcubacteria group	Candidatus Kaiserbacteria	Candidatus Kaiserbacteria bacterium CG10_big_fil_rev_8_21_14_0_10_45_20
3	cellular organisms	Bacteria	Patescibacteria group	Parcubacteria group	unclassified Parcubacteria group	Parcubacteria group bacterium GW2011_GWA2_49_9
1	cellular organisms	Bacteria	Patescibacteria group	Microgenomates group	Candidatus Woesebacteria	Candidatus Woesebacteria bacterium GW2011_GWA2_44_33
1	cellular organisms	Bacteria	Candidatus Peregrinibacteria	unclassified Candidatus Peregrinibacteria	Candidatus Peregrinibacteria bacterium RIFCSPLOWO2_01_FULL_48_20
1	cellular organisms	Bacteria	Candidatus Rokubacteria	Candidatus Rokubacteria bacterium RIFCSPLOWO2_02_FULL_73_56
1	cellular organisms	Bacteria	Patescibacteria group	Microgenomates group	Candidatus Curtissbacteria	Candidatus Curtissbacteria bacterium GW2011_GWA1_40_16
2	cellular organisms	Bacteria	Patescibacteria group	Microgenomates group	Candidatus Chisholmbacteria
4	cellular organisms	Bacteria	Candidatus Bipolaricaulota	unclassified Candidatus Bipolaricaulota	Candidatus Acetothermia bacterium
2	cellular organisms	Bacteria	Patescibacteria group	Parcubacteria group	Candidatus Staskawiczbacteria
1	cellular organisms	Bacteria	Candidatus Peregrinibacteria	unclassified Candidatus Peregrinibacteria	Candidatus Peregrinibacteria bacterium CG11_big_fil_rev_8_21_14_0_20_46_8
1	cellular organisms	Bacteria	Patescibacteria group	Parcubacteria group	Candidatus Wildermuthbacteria
1	cellular organisms	Bacteria	Candidatus Aerophobetes	unclassified Aerophobetes	Candidatus Aerophobetes bacterium Ae_b3b
1	cellular organisms	Bacteria	candidate division WWE3	candidate division WWE3 bacterium RBG_19FT_COMBO_34_6
1	cellular organisms	Bacteria	Patescibacteria group	Parcubacteria group	Candidatus Portnoybacteria	Candidatus Portnoybacteria bacterium CG11_big_fil_rev_8_21_14_0_20_40_15
1	cellular organisms	Bacteria	Patescibacteria group	Parcubacteria group	Candidatus Buchananbacteria	Candidatus Buchananbacteria bacterium RIFCSPHIGHO2_02_FULL_56_16
1	cellular organisms	Bacteria	Patescibacteria group	Parcubacteria group	Candidatus Falkowbacteria	Candidatus Falkowbacteria bacterium
1	cellular organisms	Bacteria	Patescibacteria group	Parcubacteria group	Candidatus Moranbacteria	Candidatus Moranbacteria bacterium RIFCSPHIGHO2_01_FULL_55_24
1	cellular organisms	Bacteria	Patescibacteria group	Parcubacteria group	unclassified Parcubacteria group	Parcubacteria group bacterium GW2011_GWA1_51_12
1	cellular organisms	Bacteria	Patescibacteria group	Microgenomates group	Candidatus Shapirobacteria	Candidatus Shapirobacteria bacterium CG_4_9_14_0_2_um_filter_39_11
1	cellular organisms	Bacteria	Patescibacteria group	Parcubacteria group	Candidatus Falkowbacteria	Candidatus Falkowbacteria bacterium GW2011_GWF2_43_32
1	cellular organisms	Bacteria	Patescibacteria group	Parcubacteria group	Candidatus Magasanikbacteria	Candidatus Magasanikbacteria bacterium GW2011_GWA2_40_10
1	cellular organisms	Bacteria	Patescibacteria group	Parcubacteria group	unclassified Parcubacteria group	Parcubacteria group bacterium Greene0416_79
2	cellular organisms	Bacteria	candidate division KSB1	unclassified candidate division KSB1	candidate division KSB1 bacterium 4484_188
1	cellular organisms	Bacteria	Patescibacteria group	Parcubacteria group	Candidatus Harrisonbacteria	Candidatus Harrisonbacteria bacterium CG10_big_fil_rev_8_21_14_0_10_40_38
1	cellular organisms	Bacteria	Patescibacteria group	Parcubacteria group	unclassified Parcubacteria group	Parcubacteria group bacterium LiPW_41
1	cellular organisms	Bacteria	Patescibacteria group	Parcubacteria group	Candidatus Ryanbacteria	Candidatus Ryanbacteria bacterium RIFCSPHIGHO2_02_FULL_45_13b
1	cellular organisms	Bacteria	Patescibacteria group	Microgenomates group	Candidatus Beckwithbacteria	Candidatus Beckwithbacteria bacterium GW2011_GWA2_43_10
1	cellular organisms	Bacteria	Patescibacteria group	Parcubacteria group	unclassified Parcubacteria group	Parcubacteria group bacterium 37-58-5
1	cellular organisms	Bacteria	Patescibacteria group	Parcubacteria group	unclassified Parcubacteria group	Parcubacteria group bacterium 21-54-25
2	cellular organisms	Bacteria	Patescibacteria group	Microgenomates group	Candidatus Gottesmanbacteria	Candidatus Gottesmanbacteria bacterium RIFOXYB1_FULL_47_11
8	cellular organisms	Bacteria	Candidatus Raymondbacteria
2	cellular organisms	Bacteria	Candidatus Saccharibacteria	unclassified Saccharibacteria	Candidatus Saccharibacteria bacterium 32-50-13
1	cellular organisms	Bacteria	Candidatus Peregrinibacteria	unclassified Candidatus Peregrinibacteria	Candidatus Peregrinibacteria bacterium HGW-Peregrinibacteria-1
1	cellular organisms	Bacteria	Patescibacteria group	Parcubacteria group	unclassified Parcubacteria group	Parcubacteria group bacterium SW_4_49_11
1	cellular organisms	Bacteria	Patescibacteria group	Microgenomates group	Candidatus Amesbacteria	Candidatus Amesbacteria bacterium GW2011_GWA2_42_12
3	cellular organisms	Bacteria	Candidatus Dojkabacteria	candidate division WS6 bacterium OLB20
7	cellular organisms	Bacteria	Candidatus Aminicenantes	unclassified Aminicenantes	Candidatus Aminicenantes bacterium RBG_13_62_12
2	cellular organisms	Bacteria	Candidatus Riflebacteria	Candidatus Riflebacteria bacterium RBG_13_59_9
3	cellular organisms	Bacteria	Candidatus Saccharibacteria	unclassified Saccharibacteria	Candidatus Saccharibacteria bacterium GW2011_GWC2_48_9
1	cellular organisms	Bacteria	Candidatus Firestonebacteria	Candidatus Firestonebacteria bacterium GWA2_43_8
6	cellular organisms	Bacteria	Candidatus Saccharibacteria	unclassified Saccharibacteria	Candidatus Saccharibacteria bacterium 32-50-10
3	cellular organisms	Bacteria	candidate division CPR1	candidate division CPR1 bacterium GW2011_GWA2_42_17
3	cellular organisms	Bacteria	Patescibacteria group	Microgenomates group	Candidatus Gottesmanbacteria	Candidatus Gottesmanbacteria bacterium GW2011_GWC2_39_8
2	cellular organisms	Bacteria	Patescibacteria group	Microgenomates group	Candidatus Curtissbacteria
1	cellular organisms	Bacteria	Patescibacteria group	Microgenomates group	unclassified Microgenomates group	unclassified Microgenomates group (miscellaneous)	Microgenomates group bacterium GW2011_GWA1_48_10
1	cellular organisms	Bacteria	Patescibacteria group	Parcubacteria group	Candidatus Wildermuthbacteria	Candidatus Wildermuthbacteria bacterium RIFCSPHIGHO2_01_FULL_49_22b
1	cellular organisms	Bacteria	Patescibacteria group	Parcubacteria group	unclassified Parcubacteria group	Parcubacteria group bacterium CG2_30_45_37
1	cellular organisms	Bacteria	Patescibacteria group	Microgenomates group	Candidatus Pacebacteria	Candidatus Pacebacteria bacterium CG_4_9_14_0_2_um_filter_34_50
2	cellular organisms	Bacteria	Patescibacteria group	Microgenomates group	Candidatus Woesebacteria	Candidatus Woesebacteria bacterium GW2011_GWC2_45_9
4	cellular organisms	Bacteria	Patescibacteria group	Parcubacteria group	Candidatus Parcubacteria	unclassified Parcubacteria	Parcubacteria bacterium SG8_24
1	cellular organisms	Bacteria	Patescibacteria group	Parcubacteria group	Candidatus Campbellbacteria	Candidatus Campbellbacteria bacterium GW2011_OD1_34_28
1	cellular organisms	Bacteria	Candidatus Abawacabacteria	Candidatus Abawacabacteria bacterium RBG_16_42_10
1	cellular organisms	Bacteria	Patescibacteria group	Parcubacteria group	unclassified Parcubacteria group	Parcubacteria group bacterium SW_4_46_8
2	cellular organisms	Bacteria	Patescibacteria group	Parcubacteria group	unclassified Parcubacteria group	Parcubacteria group bacterium LiPW_15
1	cellular organisms	Bacteria	Candidatus Saccharibacteria	TM7 phylum sp. oral taxon 350
2	cellular organisms	Bacteria	candidate division KSB1	unclassified candidate division KSB1	candidate division KSB1 bacterium 4484_87
3	cellular organisms	Bacteria	Candidatus Atribacteria	unclassified Atribacteria	Candidatus Atribacteria bacterium
2	cellular organisms	Bacteria	Patescibacteria group	Microgenomates group	Candidatus Roizmanbacteria	Candidatus Roizmanbacteria bacterium GW2011_GWA2_37_7
1	cellular organisms	Bacteria	Patescibacteria group	Parcubacteria group	Candidatus Nomurabacteria	Candidatus Nomurabacteria bacterium GWB1_40_6
2	cellular organisms	Bacteria	Candidatus Schekmanbacteria	Candidatus Schekmanbacteria bacterium
5	cellular organisms	Bacteria	Candidatus Peregrinibacteria	Candidatus Peribacteria	unclassified Candidatus Peribacteria	Candidatus Peribacteria bacterium RIFCSPHIGHO2_01_FULL_51_9
1	cellular organisms	Bacteria	Patescibacteria group	Parcubacteria group	Candidatus Moranbacteria	Candidatus Moranbacteria bacterium CG_4_9_14_3_um_filter_42_9
5	cellular organisms	Bacteria	Candidatus Dependentiae	unclassified Candidatus Dependentiae	candidate division TM6 bacterium GW2011_GWF2_37_49
4	cellular organisms	Bacteria	candidate division KSB1	unclassified candidate division KSB1	candidate division KSB1 bacterium 4572_119
1	cellular organisms	Bacteria	candidate division WWE3	candidate division WWE3 bacterium RBG_16_52_45
1	cellular organisms	Bacteria	Candidatus Berkelbacteria	Candidatus Berkelbacteria bacterium CG1_02_42_45
2	cellular organisms	Bacteria	Candidatus Saccharibacteria	unclassified Saccharibacteria	Candidatus Saccharibacteria bacterium RIFCSPHIGHO2_12_FULL_42_8
10	cellular organisms	Bacteria	Candidatus Dadabacteria
2	cellular organisms	Bacteria	Patescibacteria group	Parcubacteria group	unclassified Parcubacteria group	Parcubacteria group bacterium Athens0714_25
2	cellular organisms	Bacteria	Patescibacteria group	Microgenomates group	Candidatus Amesbacteria
13	cellular organisms	Bacteria	candidate division WWE3
1	cellular organisms	Bacteria	Patescibacteria group	Parcubacteria group	Candidatus Kaiserbacteria	Candidatus Kaiserbacteria bacterium CG10_big_fil_rev_8_21_14_0_10_51_14
1	cellular organisms	Bacteria	Candidatus Berkelbacteria	Candidatus Berkelbacteria bacterium Gr01-1014_85
5	cellular organisms	Bacteria	Patescibacteria group	Parcubacteria group	Candidatus Nealsonbacteria
1	cellular organisms	Bacteria	Candidatus Rokubacteria	Candidatus Rokubacteria bacterium 13_1_40CM_4_67_11
13	cellular organisms	Bacteria	Candidatus Sumerlaeota	unclassified Candidatus Sumerlaeota	candidate division BRC1 bacterium ADurb.BinA364
2	cellular organisms	Bacteria	Patescibacteria group	Parcubacteria group	Candidatus Niyogibacteria	Candidatus Niyogibacteria bacterium CG10_big_fil_rev_8_21_14_0_10_46_36
3	cellular organisms	Bacteria	candidate division WOR-3	candidate division WOR_3 bacterium SM1_77
7	cellular organisms	Bacteria	Candidatus Wallbacteria	Candidatus Wallbacteria bacterium HGW-Wallbacteria-1
15	cellular organisms	Bacteria	Patescibacteria group	Candidatus Gracilibacteria	unclassified Candidatus Gracilibacteria	Candidatus Gracilibacteria bacterium
1	cellular organisms	Bacteria	Patescibacteria group	Parcubacteria group	Candidatus Niyogibacteria
26	cellular organisms	Bacteria	Patescibacteria group	Parcubacteria group	Candidatus Uhrbacteria
39	cellular organisms	Bacteria	Patescibacteria group	Parcubacteria group	Candidatus Kaiserbacteria
5	cellular organisms	Bacteria	Patescibacteria group	Parcubacteria group	Candidatus Adlerbacteria
1	cellular organisms	Bacteria	Patescibacteria group	Parcubacteria group	Candidatus Portnoybacteria	Candidatus Portnoybacteria bacterium RIFCSPLOWO2_01_FULL_43_11
1	cellular organisms	Bacteria	Patescibacteria group	Parcubacteria group	Candidatus Kerfeldbacteria	Candidatus Kerfeldbacteria bacterium RIFCSPHIGHO2_12_FULL_48_17
1	cellular organisms	Bacteria	Patescibacteria group	Parcubacteria group	unclassified Parcubacteria group	Parcubacteria group bacterium GW2011_GWC1_43_11b
2	cellular organisms	Bacteria	Candidatus Dependentiae	unclassified Candidatus Dependentiae	candidate division TM6 bacterium GW2011_GWF2_36_6
1	cellular organisms	Bacteria	Candidatus Rokubacteria	Candidatus Rokubacteria bacterium 13_2_20CM_70_12
1	cellular organisms	Bacteria	Patescibacteria group	Parcubacteria group	Candidatus Liptonbacteria	Candidatus Liptonbacteria bacterium RIFCSPLOWO2_01_FULL_53_13
4	cellular organisms	Bacteria	Patescibacteria group	Microgenomates group	Candidatus Levybacteria	Candidatus Levybacteria bacterium RBG_16_35_11
4	cellular organisms	Bacteria	Patescibacteria group	Parcubacteria group	unclassified Parcubacteria group	Parcubacteria group bacterium GW2011_GWA2_49_16
1	cellular organisms	Bacteria	Patescibacteria group	Parcubacteria group	Candidatus Kaiserbacteria	Candidatus Kaiserbacteria bacterium RIFCSPHIGHO2_02_FULL_55_20
5	cellular organisms	Bacteria	Patescibacteria group	Parcubacteria group	Candidatus Giovannonibacteria
7	cellular organisms	Bacteria	Candidatus Fischerbacteria	Candidatus Fischerbacteria bacterium RBG_13_37_8
1	cellular organisms	Bacteria	Patescibacteria group	Parcubacteria group	Candidatus Kaiserbacteria	Candidatus Kaiserbacteria bacterium CG10_big_fil_rev_8_21_14_0_10_56_12
16	cellular organisms	Bacteria	Candidatus Rokubacteria	Candidatus Rokubacteria bacterium 13_1_40CM_68_15
1	cellular organisms	Bacteria	candidate division CPR1	candidate division CPR1 bacterium ADurb.Bin160
1	cellular organisms	Bacteria	Patescibacteria group	Parcubacteria group	unclassified Parcubacteria group	Parcubacteria group bacterium GW2011_GWA2_50_10b
3	cellular organisms	Bacteria	Patescibacteria group	Parcubacteria group	Candidatus Harrisonbacteria
1	cellular organisms	Bacteria	Candidatus Wallbacteria	Candidatus Wallbacteria bacterium GWC2_49_35
4	cellular organisms	Bacteria	Candidatus Atribacteria	unclassified Atribacteria
2	cellular organisms	Bacteria	Patescibacteria group	Parcubacteria group	unclassified Parcubacteria group	Parcubacteria group bacterium Gr01-1014_19
4	cellular organisms	Bacteria	Candidatus Riflebacteria	Candidatus Riflebacteria bacterium
18	cellular organisms	Bacteria	Patescibacteria group	Parcubacteria group	unclassified Parcubacteria group
10	cellular organisms	Bacteria	Candidatus Dependentiae	unclassified Candidatus Dependentiae	candidate division TM6 bacterium RIFCSPHIGHO2_12_FULL_36_22
7	cellular organisms	Bacteria	Candidatus Eisenbacteria	Candidatus Eisenbacteria bacterium RBG_16_71_46
104	cellular organisms	Bacteria	Patescibacteria group	Parcubacteria group
4	cellular organisms	Bacteria	Patescibacteria group	Parcubacteria group	unclassified Parcubacteria group	Parcubacteria group bacterium Gr01-1014_13
2	cellular organisms	Bacteria	Patescibacteria group	Parcubacteria group	Candidatus Falkowbacteria	Candidatus Falkowbacteria bacterium CG10_big_fil_rev_8_21_14_0_10_37_18
1	cellular organisms	Bacteria	Patescibacteria group	Parcubacteria group	Candidatus Magasanikbacteria	Candidatus Magasanikbacteria bacterium CG1_02_32_51
1	cellular organisms	Bacteria	Patescibacteria group	Parcubacteria group	Candidatus Portnoybacteria	Candidatus Portnoybacteria bacterium CG10_big_fil_rev_8_21_14_0_10_44_7
9	cellular organisms	Bacteria	Patescibacteria group	Parcubacteria group	Candidatus Falkowbacteria
1	cellular organisms	Bacteria	Patescibacteria group	Parcubacteria group	Candidatus Moranbacteria	Candidatus Moranbacteria bacterium CG_4_8_14_3_um_filter_34_16
9	cellular organisms	Bacteria	Candidatus Peregrinibacteria
1	cellular organisms	Bacteria	Patescibacteria group	Microgenomates group	Candidatus Roizmanbacteria	Candidatus Roizmanbacteria bacterium CG11_big_fil_rev_8_21_14_0_20_36_8
1	cellular organisms	Bacteria	Patescibacteria group	Parcubacteria group	Candidatus Jorgensenbacteria
1	cellular organisms	Bacteria	Patescibacteria group	Microgenomates group	Candidatus Woesebacteria	Candidatus Woesebacteria bacterium RIFOXYA1_FULL_48_16
5	cellular organisms	Bacteria	candidate division NC10	unclassified candidate division NC10	candidate division NC10 bacterium RBG_16_65_8
2	cellular organisms	Bacteria	Patescibacteria group	Parcubacteria group	unclassified Parcubacteria group	Parcubacteria group bacterium ADurb.Bin216
2	cellular organisms	Bacteria	Patescibacteria group	Microgenomates group	Candidatus Woesebacteria	Candidatus Woesebacteria bacterium RIFCSPHIGHO2_01_FULL_39_23
9	cellular organisms	Bacteria	candidate division NC10
5	cellular organisms	Bacteria	Candidatus Saccharibacteria	Candidatus Saccharimonas	unclassified Candidatus Saccharimonas	Candidatus Saccharimonas sp.
2	cellular organisms	Bacteria	Patescibacteria group	Parcubacteria group	Candidatus Sungbacteria	Candidatus Sungbacteria bacterium RIFCSPLOWO2_01_FULL_59_16
1	cellular organisms	Bacteria	Candidatus Dojkabacteria
6	cellular organisms	Bacteria	candidate division TA06	candidate division TA06 bacterium
1	cellular organisms	Bacteria	candidate division NPL-UPA2	candidate division NPL-UPA2 bacterium Unc8
17	cellular organisms	Bacteria	Candidatus Sumerlaeota	unclassified Candidatus Sumerlaeota	candidate division BRC1 bacterium ADurb.BinA292
1	cellular organisms	Bacteria	Patescibacteria group	Parcubacteria group	Candidatus Lloydbacteria	Candidatus Lloydbacteria bacterium RIFCSPHIGHO2_01_FULL_41_20
2	cellular organisms	Bacteria	Candidatus Atribacteria	unclassified Atribacteria	Atribacteria bacterium JGI 0000014-F07
7	cellular organisms	Bacteria	Patescibacteria group	Microgenomates group	Candidatus Microgenomates	unclassified Microgenomates	Candidatus Microgenomates bacterium
3	cellular organisms	Bacteria	Patescibacteria group	Parcubacteria group	Candidatus Kaiserbacteria	Candidatus Kaiserbacteria bacterium RIFOXYB1_FULL_46_14
2	cellular organisms	Bacteria	Candidatus Berkelbacteria	Candidatus Berkelbacteria bacterium CG10_big_fil_rev_8_21_14_0_10_43_13
1	cellular organisms	Bacteria	Candidatus Dojkabacteria	candidate division WS6 bacterium OLB21
2	cellular organisms	Bacteria	candidate division Kazan-3B-28	candidate division Kazan bacterium GW2011_GWA1_44_22
6	cellular organisms	Bacteria	Patescibacteria group	Parcubacteria group	Candidatus Lloydbacteria
12	cellular organisms	Bacteria	candidate division NC10	Candidatus Methylomirabilis	Candidatus Methylomirabilis limnetica
1	cellular organisms	Bacteria	Patescibacteria group	Microgenomates group	Candidatus Daviesbacteria	Candidatus Daviesbacteria bacterium RIFCSPHIGHO2_01_FULL_37_27
3	cellular organisms	Bacteria	candidate division WOR-3	candidate division WOR-3 bacterium JGI_Cruoil_03_44_89
2	cellular organisms	Bacteria	Patescibacteria group	Parcubacteria group	Candidatus Kaiserbacteria	Candidatus Kaiserbacteria bacterium GW2011_GWA2_58_9
4	cellular organisms	Bacteria	candidate division TA06	candidate division TA06 bacterium ADurb.Bin131
3	cellular organisms	Bacteria	Patescibacteria group	Parcubacteria group	Candidatus Magasanikbacteria	Candidatus Magasanikbacteria bacterium CG10_big_fil_rev_8_21_14_0_10_38_6
77	cellular organisms	Bacteria	Candidatus Dadabacteria	Candidatus Dadabacteria bacterium
19	cellular organisms	Bacteria	Candidatus Peregrinibacteria	unclassified Candidatus Peregrinibacteria
3	cellular organisms	Bacteria	Patescibacteria group	Parcubacteria group	unclassified Parcubacteria group	Parcubacteria group bacterium CG22_combo_CG10-13_8_21_14_all_41_9
549	cellular organisms	Bacteria	Candidatus Rokubacteria
1	cellular organisms	Bacteria	Patescibacteria group	Parcubacteria group	Candidatus Uhrbacteria	Candidatus Uhrbacteria bacterium RIFCSPHIGHO2_02_FULL_60_10
1	cellular organisms	Bacteria	Patescibacteria group	Microgenomates group	Candidatus Microgenomates	unclassified Microgenomates	Microgenomates bacterium OLB23
1	cellular organisms	Bacteria	Patescibacteria group	Parcubacteria group	Candidatus Zambryskibacteria	Candidatus Zambryskibacteria bacterium RIFCSPLOWO2_01_FULL_45_21
1	cellular organisms	Bacteria	Patescibacteria group	Parcubacteria group	Candidatus Parcubacteria	unclassified Parcubacteria	Parcubacteria bacterium C7867-002
9	cellular organisms	Bacteria	Candidatus Saccharibacteria	unclassified Saccharibacteria	Candidatus Saccharibacteria bacterium CG10_big_fil_rev_8_21_14_0_10_47_8
20	cellular organisms	Bacteria	candidate division NC10	Candidatus Methylomirabilis	Candidatus Methylomirabilis oxyfera
6	cellular organisms	Bacteria	Patescibacteria group	Parcubacteria group	Candidatus Kerfeldbacteria
2	cellular organisms	Bacteria	Patescibacteria group	Parcubacteria group	Candidatus Falkowbacteria	Candidatus Falkowbacteria bacterium RBG_13_39_14
1	cellular organisms	Bacteria	Patescibacteria group	Parcubacteria group	Candidatus Magasanikbacteria	Candidatus Magasanikbacteria bacterium RIFCSPLOWO2_02_FULL_44_11
24	cellular organisms	Bacteria	Candidatus Aerophobetes	unclassified Aerophobetes	Candidatus Aerophobetes bacterium
3	cellular organisms	Bacteria	Patescibacteria group	Parcubacteria group	unclassified Parcubacteria group	Parcubacteria group bacterium GW2011_GWC1_39_29
3	cellular organisms	Bacteria	Candidatus Doudnabacteria	Candidatus Doudnabacteria bacterium CG10_big_fil_rev_8_21_14_0_10_41_10
2	cellular organisms	Bacteria	Patescibacteria group	Microgenomates group	Candidatus Beckwithbacteria	Candidatus Beckwithbacteria bacterium CG10_big_fil_rev_8_21_14_0_10_34_10
7	cellular organisms	Bacteria	Candidatus Sumerlaeota	unclassified Candidatus Sumerlaeota	candidate division BRC1 bacterium ADurb.Bin183
2	cellular organisms	Bacteria	Patescibacteria group	Parcubacteria group	unclassified Parcubacteria group	Parcubacteria group bacterium GW2011_GWD2_42_14
2	cellular organisms	Bacteria	Patescibacteria group	Parcubacteria group	Candidatus Kaiserbacteria	Candidatus Kaiserbacteria bacterium RIFOXYD1_FULL_42_15
34	cellular organisms	Bacteria	Candidatus Aminicenantes	unclassified Aminicenantes	Candidatus Aminicenantes bacterium
2	cellular organisms	Bacteria	Candidatus Rokubacteria	Candidatus Rokubacteria bacterium 13_1_40CM_2_68_8
2	cellular organisms	Bacteria	Patescibacteria group	Parcubacteria group	Candidatus Kaiserbacteria	Candidatus Kaiserbacteria bacterium RIFCSPHIGHO2_01_FULL_46_22
7	cellular organisms	Bacteria	Candidatus Dependentiae	unclassified Candidatus Dependentiae	candidate division TM6 bacterium GW2011_GWF2_32_72
1	cellular organisms	Bacteria	Patescibacteria group	Parcubacteria group	Candidatus Uhrbacteria	Candidatus Uhrbacteria bacterium CG10_big_fil_rev_8_21_14_0_10_48_16
15	cellular organisms	Bacteria	Candidatus Sumerlaeota	unclassified Candidatus Sumerlaeota	candidate division BRC1 bacterium SM23_51
4	cellular organisms	Bacteria	candidate division Kazan-3B-28
2	cellular organisms	Bacteria	Patescibacteria group	Parcubacteria group	Candidatus Nomurabacteria	Candidatus Nomurabacteria bacterium RIFCSPLOWO2_01_FULL_46_18
22	cellular organisms	Bacteria	Patescibacteria group	Candidatus Gracilibacteria	unclassified Candidatus Gracilibacteria	Candidatus Gracilibacteria bacterium 28_42_T64
10	cellular organisms	Bacteria	Candidatus Dependentiae	unclassified Candidatus Dependentiae	Candidatus Dependentiae bacterium HGW-Dependentiae-1
1	cellular organisms	Bacteria	Patescibacteria group	Parcubacteria group	Candidatus Liptonbacteria
1	cellular organisms	Bacteria	Patescibacteria group	Parcubacteria group	Candidatus Komeilibacteria	Candidatus Komeilibacteria bacterium RIFCSPLOWO2_02_FULL_48_11
1	cellular organisms	Bacteria	Patescibacteria group	Parcubacteria group	Candidatus Magasanikbacteria	Candidatus Magasanikbacteria bacterium CG10_big_fil_rev_8_21_14_0_10_47_10
84	cellular organisms	Bacteria	candidate division KSB1	unclassified candidate division KSB1	candidate division KSB1 bacterium
4	cellular organisms	Bacteria	Candidatus Rokubacteria	Candidatus Rokubacteria bacterium RIFCSPLOWO2_02_FULL_71_18
1	cellular organisms	Bacteria	Patescibacteria group	Parcubacteria group	unclassified Parcubacteria group	Parcubacteria group bacterium Gr01-1014_73
1	cellular organisms	Bacteria	Patescibacteria group	Microgenomates group	Candidatus Gottesmanbacteria	Candidatus Gottesmanbacteria bacterium RIFCSPHIGHO2_01_FULL_47_48
37	cellular organisms	Bacteria	Patescibacteria group	Parcubacteria group	Candidatus Uhrbacteria	Candidatus Uhrbacteria bacterium
10	cellular organisms	Bacteria	Patescibacteria group
11	cellular organisms	Bacteria	Candidatus Sumerlaeota	unclassified Candidatus Sumerlaeota	candidate division BRC1 bacterium HGW-BRC1-1
7	cellular organisms	Bacteria	Candidatus Dependentiae	unclassified Candidatus Dependentiae	candidate division TM6 bacterium RIFCSPHIGHO2_12_FULL_38_8
2	cellular organisms	Bacteria	Patescibacteria group	Parcubacteria group	Candidatus Colwellbacteria	Candidatus Colwellbacteria bacterium CG10_big_fil_rev_8_21_14_0_10_42_22
1	cellular organisms	Bacteria	Candidatus Desantisbacteria	Candidatus Desantisbacteria bacterium CG07_land_8_20_14_0_80_39_15
1	cellular organisms	Bacteria	Candidatus Doudnabacteria	Candidatus Doudnabacteria bacterium RIFCSPHIGHO2_01_FULL_49_9
1	cellular organisms	Bacteria	Candidatus Peregrinibacteria	unclassified Candidatus Peregrinibacteria	Candidatus Peregrinibacteria bacterium RIFCSPLOWO2_02_FULL_39_10
14	cellular organisms	Bacteria	Patescibacteria group	Candidatus Gracilibacteria	unclassified Candidatus Gracilibacteria
1	cellular organisms	Bacteria	Patescibacteria group	Microgenomates group	Candidatus Levybacteria	Candidatus Levybacteria bacterium RBG_16_35_6
1	cellular organisms	Bacteria	Patescibacteria group	Microgenomates group	Candidatus Woesebacteria	Candidatus Woesebacteria bacterium RBG_16_39_8b
1	cellular organisms	Bacteria	Candidatus Dojkabacteria	Candidatus Dojkabacteria bacterium HGW-Dojkabacteria-1
2	cellular organisms	Bacteria	Patescibacteria group	Microgenomates group	Candidatus Amesbacteria	Candidatus Amesbacteria bacterium RIFOXYB1_FULL_44_23
1	cellular organisms	Bacteria	Patescibacteria group	Parcubacteria group	Candidatus Zambryskibacteria	Candidatus Zambryskibacteria bacterium CG10_big_fil_rev_8_21_14_0_10_34_34
4	cellular organisms	Bacteria	Candidatus Bipolaricaulota	Candidatus Bipolaricaulis	Candidatus Bipolaricaulis sibiricus
1	cellular organisms	Bacteria	Patescibacteria group	Parcubacteria group	unclassified Parcubacteria group	Parcubacteria group bacterium ADurb.Bin192
1	cellular organisms	Bacteria	Patescibacteria group	Parcubacteria group	unclassified Parcubacteria group	Parcubacteria group bacterium GW2011_GWA2_47_21
2	cellular organisms	Bacteria	Candidatus Saccharibacteria	unclassified Saccharibacteria	Candidatus Saccharibacteria bacterium 49-20
17	cellular organisms	Bacteria	Candidatus Aminicenantes	unclassified Aminicenantes
2	cellular organisms	Bacteria	Patescibacteria group	Parcubacteria group	Candidatus Kuenenbacteria
4	cellular organisms	Bacteria	Patescibacteria group	Parcubacteria group	Candidatus Yonathbacteria
1	cellular organisms	Bacteria	Candidatus Berkelbacteria	Candidatus Berkelbacteria bacterium Athens1014_28
1	cellular organisms	Bacteria	Patescibacteria group	Parcubacteria group	Candidatus Sungbacteria	Candidatus Sungbacteria bacterium RIFCSPHIGHO2_02_FULL_47_11
1	cellular organisms	Bacteria	Candidatus Saccharibacteria	TM7 phylum sp. oral taxon 352
6	cellular organisms	Bacteria	Candidatus Dependentiae	unclassified Candidatus Dependentiae	candidate division TM6 bacterium GW2011_GWF2_43_87
12	cellular organisms	Bacteria	Patescibacteria group	Parcubacteria group	Candidatus Zambryskibacteria
25	cellular organisms	Bacteria	Patescibacteria group	Microgenomates group	Candidatus Woesebacteria
2	cellular organisms	Bacteria	Patescibacteria group	Parcubacteria group	Candidatus Kaiserbacteria	Candidatus Kaiserbacteria bacterium RIFCSPHIGHO2_01_FULL_54_36b
1	cellular organisms	Bacteria	Patescibacteria group	Parcubacteria group	Candidatus Parcubacteria	unclassified Parcubacteria	Parcubacteria bacterium 32_520
1	cellular organisms	Bacteria	Candidatus Saccharibacteria	TM7 phylum sp. oral taxon 351
1	cellular organisms	Bacteria	candidate division WWE3	candidate division WWE3 bacterium RIFCSPHIGHO2_12_FULL_38_15
38	cellular organisms	Bacteria	Candidatus Dependentiae	unclassified Candidatus Dependentiae	Candidatus Dependentiae bacterium
4	cellular organisms	Bacteria	Candidatus Doudnabacteria	Candidatus Doudnabacteria bacterium Gr01-1014_77
2	cellular organisms	Bacteria	Patescibacteria group	Microgenomates group	Candidatus Gottesmanbacteria	Candidatus Gottesmanbacteria bacterium RIFCSPHIGHO2_02_FULL_39_11
3	cellular organisms	Bacteria	candidate division KSB1	unclassified candidate division KSB1
1	cellular organisms	Bacteria	Patescibacteria group	Parcubacteria group	Candidatus Kaiserbacteria	Candidatus Kaiserbacteria bacterium RIFCSPLOWO2_01_FULL_54_24
4	cellular organisms	Bacteria	Patescibacteria group	Parcubacteria group	Candidatus Adlerbacteria	Candidatus Adlerbacteria bacterium RIFCSPHIGHO2_12_FULL_53_18
14	cellular organisms	Bacteria	Candidatus Dependentiae	Candidatus Babeliae	Candidatus Babeliales	Candidatus Babeliaceae	Candidatus Babela	Candidatus Babela massiliensis
2234	cellular organisms	Bacteria	Candidatus Rokubacteria	Candidatus Rokubacteria bacterium
2	cellular organisms	Bacteria	Candidatus Dojkabacteria	candidate division WS6 bacterium GW2011_GWF2_39_15
4	cellular organisms	Bacteria	Patescibacteria group	Parcubacteria group	Candidatus Wolfebacteria
42	cellular organisms	Bacteria	Patescibacteria group	unclassified Patescibacteria group	Patescibacteria group bacterium
1	cellular organisms	Bacteria	Patescibacteria group	Microgenomates group	Candidatus Woesebacteria	Candidatus Woesebacteria bacterium GW2011_GWB1_38_8
2	cellular organisms	Bacteria	Candidatus Saccharibacteria	unclassified Saccharibacteria	Candidatus Saccharibacteria bacterium GW2011_GWA2_46_10
1	cellular organisms	Bacteria	Patescibacteria group	Parcubacteria group	Candidatus Komeilibacteria	Candidatus Komeilibacteria bacterium RIFCSPLOWO2_01_FULL_45_10
1	cellular organisms	Bacteria	Patescibacteria group	Parcubacteria group	Candidatus Jorgensenbacteria	Candidatus Jorgensenbacteria bacterium RIFCSPLOWO2_12_FULL_42_11
1	cellular organisms	Bacteria	Patescibacteria group	Parcubacteria group	Candidatus Adlerbacteria	Candidatus Adlerbacteria bacterium RIFCSPLOWO2_01_FULL_51_16
2	cellular organisms	Bacteria	Patescibacteria group	Microgenomates group	Candidatus Microgenomates	unclassified Microgenomates	Microgenomates bacterium 39_7
2	cellular organisms	Bacteria	Patescibacteria group	Microgenomates group	unclassified Microgenomates group	unclassified Microgenomates group (miscellaneous)	Microgenomates group bacterium ADurb.Bin219
5	cellular organisms	Bacteria	Patescibacteria group	Parcubacteria group	unclassified Parcubacteria group	Parcubacteria group bacterium CG2_30_44_11
1	cellular organisms	Bacteria	Patescibacteria group	Parcubacteria group	Candidatus Falkowbacteria	Candidatus Falkowbacteria bacterium RIFOXYC2_FULL_47_12
1	cellular organisms	Bacteria	Candidatus Doudnabacteria	Candidatus Doudnabacteria bacterium RIFCSPHIGHO2_02_FULL_46_11
5	cellular organisms	Bacteria	Patescibacteria group	Parcubacteria group	unclassified Parcubacteria group	Parcubacteria group bacterium Gr01-1014_8
7	cellular organisms	Bacteria	Candidatus Doudnabacteria	Candidatus Doudnabacteria bacterium RIFCSPHIGHO2_01_FULL_45_18
1	cellular organisms	Bacteria	Patescibacteria group	Parcubacteria group	Candidatus Vogelbacteria	Candidatus Vogelbacteria bacterium GWA1_51_14
2	cellular organisms	Bacteria	Patescibacteria group	Parcubacteria group	unclassified Parcubacteria group	Parcubacteria group bacterium GW2011_GWF2_38_76
1	cellular organisms	Bacteria	Candidatus Atribacteria	unclassified Atribacteria	Candidatus Atribacteria bacterium 1244-E10-H5-B2
12	cellular organisms	Bacteria	Candidatus Dependentiae	unclassified Candidatus Dependentiae	candidate division TM6 bacterium RIFCSPHIGHO2_12_FULL_32_22
26	cellular organisms	Bacteria	Candidatus Saccharibacteria	unclassified Saccharibacteria	Candidatus Saccharibacteria bacterium CG_4_10_14_0_2_um_filter_52_9
21	cellular organisms	Bacteria	Candidatus Saccharibacteria	unclassified Saccharibacteria	Candidatus Saccharibacteria bacterium RIFCSPHIGHO2_02_FULL_47_12
1	cellular organisms	Bacteria	Patescibacteria group	Parcubacteria group	unclassified Parcubacteria group	Parcubacteria group bacterium Greene0416_14
19	cellular organisms	Bacteria	Candidatus Rokubacteria	Candidatus Rokubacteria bacterium RIFCSPLOWO2_12_FULL_71_22
1	cellular organisms	Bacteria	Patescibacteria group	Microgenomates group	Candidatus Levybacteria	Candidatus Levybacteria bacterium RIFCSPLOWO2_01_FULL_38_21
1	cellular organisms	Bacteria	Candidatus Atribacteria	unclassified Atribacteria	Atribacteria bacterium 34_128
1	cellular organisms	Bacteria	Candidatus Berkelbacteria	Candidatus Berkelbacteria bacterium Licking1014_85
5	cellular organisms	Bacteria	Candidatus Aminicenantes	unclassified Aminicenantes	Candidatus Aminicenantes bacterium RBG_13_59_9
2	cellular organisms	Bacteria	Candidatus Bipolaricaulota	Candidatus Bipolaricaulis	Candidatus Bipolaricaulis anaerobius
2	cellular organisms	Bacteria	Candidatus Berkelbacteria	Berkelbacteria bacterium GW2011_GWA2_38_9
1	cellular organisms	Bacteria	Candidatus Berkelbacteria	Berkelbacteria bacterium GW2011_GWA2_46_7
2	cellular organisms	Bacteria	Patescibacteria group	Parcubacteria group	Candidatus Sungbacteria
2	cellular organisms	Bacteria	Patescibacteria group	Parcubacteria group	Candidatus Kaiserbacteria	Candidatus Kaiserbacteria bacterium CG_4_9_14_0_2_um_filter_41_32
12	cellular organisms	Bacteria	Patescibacteria group	Parcubacteria group	Candidatus Moranbacteria	Candidatus Moranbacteria bacterium
46	cellular organisms	Bacteria	Patescibacteria group	Parcubacteria group	Candidatus Parcubacteria	unclassified Parcubacteria	Candidatus Parcubacteria bacterium
32	cellular organisms	Bacteria
1	cellular organisms	Bacteria	Patescibacteria group	Parcubacteria group	Candidatus Magasanikbacteria	Candidatus Magasanikbacteria bacterium CG10_big_fil_rev_8_21_14_0_10_36_32
2	cellular organisms	Bacteria	Patescibacteria group	Parcubacteria group	Candidatus Andersenbacteria	Candidatus Andersenbacteria bacterium CG10_big_fil_rev_8_21_14_0_10_54_11
1	cellular organisms	Bacteria	Patescibacteria group	Parcubacteria group	Candidatus Wolfebacteria	Candidatus Wolfebacteria bacterium RIFCSPLOWO2_01_FULL_47_17b
10	cellular organisms	Bacteria	candidate division KSB3	candidate division KSB3 bacterium
1	cellular organisms	Bacteria	Patescibacteria group	Microgenomates group	Candidatus Collierbacteria	Candidatus Collierbacteria bacterium CG09_land_8_20_14_0_10_46_12
1	cellular organisms	Bacteria	Patescibacteria group	Parcubacteria group	Candidatus Yanofskybacteria	Candidatus Yanofskybacteria bacterium RIFCSPHIGHO2_01_FULL_48_25b
2	cellular organisms	Bacteria	Patescibacteria group	Parcubacteria group	Candidatus Magasanikbacteria	Candidatus Magasanikbacteria bacterium CG10_big_fil_rev_8_21_14_0_10_36_16
16	cellular organisms	Bacteria	Candidatus Rokubacteria	Candidatus Rokubacteria bacterium CSP1-6
2	cellular organisms	Bacteria	Patescibacteria group	Parcubacteria group	Candidatus Liptonbacteria	Candidatus Liptonbacteria bacterium CG11_big_fil_rev_8_21_14_0_20_35_14
1	cellular organisms	Bacteria	candidate division WWE3	candidate division WWE3 bacterium CG08_land_8_20_14_0_20_41_15
1	cellular organisms	Bacteria	Patescibacteria group	Parcubacteria group	unclassified Parcubacteria group	Parcubacteria group bacterium GW2011_GWA2_44_12
8	cellular organisms	Bacteria	Patescibacteria group	Microgenomates group	Candidatus Pacebacteria
1	cellular organisms	Bacteria	Patescibacteria group	Parcubacteria group	Candidatus Nomurabacteria	Candidatus Nomurabacteria bacterium RIFCSPHIGHO2_02_FULL_36_29
2	cellular organisms	Bacteria	Patescibacteria group	Microgenomates group	unclassified Microgenomates group	unclassified Microgenomates group (miscellaneous)
1	cellular organisms	Bacteria	Patescibacteria group	Parcubacteria group	Candidatus Nomurabacteria	Candidatus Nomurabacteria bacterium RIFCSPLOWO2_01_FULL_41_21
5	cellular organisms	Bacteria	Candidatus Coatesbacteria	Candidatus Coatesbacteria bacterium
9	cellular organisms	Bacteria	Candidatus Dependentiae	Vermiphilus	Vermiphilus pyriformis	candidate division TM6 bacterium JCVI TM6SC1
1	cellular organisms	Bacteria	Patescibacteria group	Parcubacteria group	Candidatus Lloydbacteria	Candidatus Lloydbacteria bacterium RIFCSPLOWO2_12_FULL_51_9
1	cellular organisms	Bacteria	Patescibacteria group	Parcubacteria group	Candidatus Falkowbacteria	Candidatus Falkowbacteria bacterium CG10_big_fil_rev_8_21_14_0_10_43_10
3	cellular organisms	Bacteria	Patescibacteria group	Parcubacteria group	Candidatus Ryanbacteria
5	cellular organisms	Bacteria	Patescibacteria group	Parcubacteria group	Candidatus Kaiserbacteria	Candidatus Kaiserbacteria bacterium
32	cellular organisms	Bacteria	Candidatus Doudnabacteria
14	cellular organisms	Bacteria	Candidatus Dependentiae	unclassified Candidatus Dependentiae
9	cellular organisms	Bacteria	Candidatus Rokubacteria	Candidatus Rokubacteria bacterium 13_1_40CM_4_69_5
1	cellular organisms	Bacteria	Patescibacteria group	Parcubacteria group	Candidatus Yanofskybacteria	Candidatus Yanofskybacteria bacterium CG10_big_fil_rev_8_21_14_0_10_37_15
5	cellular organisms	Bacteria	Patescibacteria group	Microgenomates group	Candidatus Collierbacteria
40	cellular organisms	Bacteria	Candidatus Saccharibacteria	unclassified Saccharibacteria
1	cellular organisms	Bacteria	Patescibacteria group	Microgenomates group	Candidatus Woesebacteria	Candidatus Woesebacteria bacterium RIFCSPHIGHO2_01_FULL_44_21
1	cellular organisms	Bacteria	candidate division CPR3	candidate division CPR3 bacterium 4484_211
11	cellular organisms	Bacteria	Candidatus Rokubacteria	Candidatus Rokubacteria bacterium RIFCSPLOWO2_02_FULL_68_19
1	cellular organisms	Bacteria	Patescibacteria group	Parcubacteria group	Candidatus Nomurabacteria	Candidatus Nomurabacteria bacterium RIFCSPHIGHO2_01_FULL_40_24b
1	cellular organisms	Bacteria	Patescibacteria group	Microgenomates group	Candidatus Roizmanbacteria	Candidatus Roizmanbacteria bacterium CG22_combo_CG10-13_8_21_14_all_35_9
1	cellular organisms	Bacteria	Patescibacteria group	Parcubacteria group	unclassified Parcubacteria group	Parcubacteria group bacterium GW2011_GWC2_39_14
3	cellular organisms	Bacteria	Candidatus Riflebacteria
3	cellular organisms	Bacteria	Patescibacteria group	Microgenomates group	Candidatus Gottesmanbacteria	Candidatus Gottesmanbacteria bacterium RIFCSPLOWO2_01_FULL_46_9
1	cellular organisms	Bacteria	Patescibacteria group	Parcubacteria group	Candidatus Taylorbacteria	Candidatus Taylorbacteria bacterium RIFCSPLOWO2_01_FULL_45_34b
1	cellular organisms	Bacteria	candidate division WWE3	candidate division WWE3 bacterium GW2011_GWB1_47_11
1	cellular organisms	Bacteria	Patescibacteria group	Parcubacteria group	unclassified Parcubacteria group	Parcubacteria group bacterium GW2011_GWA2_47_16
66	cellular organisms	Bacteria	Candidatus Saccharibacteria	unclassified Saccharibacteria	Candidatus Saccharibacteria bacterium
1	cellular organisms	Bacteria	Candidatus Berkelbacteria	Candidatus Berkelbacteria bacterium CG_4_10_14_0_8_um_filter_42_34
2	cellular organisms	Bacteria	Patescibacteria group	Parcubacteria group	unclassified Parcubacteria group	Parcubacteria group bacterium Greene0714_7
1	cellular organisms	Bacteria	Candidatus Saccharibacteria	unclassified Saccharibacteria	Candidatus Saccharibacteria bacterium 32-45-3
20	cellular organisms	Bacteria	Candidatus Rokubacteria	Candidatus Rokubacteria bacterium GWA2_70_23
22	cellular organisms	Bacteria	candidate division NC10	unclassified candidate division NC10	candidate division NC10 bacterium
3	cellular organisms	Bacteria	Patescibacteria group	Parcubacteria group	Candidatus Liptonbacteria	Candidatus Liptonbacteria bacterium RIFCSPHIGHO2_01_FULL_57_28
2	cellular organisms	Bacteria	Candidatus Bipolaricaulota	unclassified Candidatus Bipolaricaulota	Acetothermia bacterium 64_32
4	cellular organisms	Bacteria	Candidatus Aerophobetes	unclassified Aerophobetes	Candidatus Aerophobetes bacterium Ae_b3a
1	cellular organisms	Bacteria	Patescibacteria group	Microgenomates group	Candidatus Woykebacteria	Candidatus Woykebacteria bacterium RIFCSPHIGHO2_12_FULL_45_10
1	cellular organisms	Bacteria	Patescibacteria group	Microgenomates group	Candidatus Levybacteria	Candidatus Levybacteria bacterium RIFCSPHIGHO2_01_FULL_40_15b
1	cellular organisms	Bacteria	Patescibacteria group	Microgenomates group	Candidatus Levybacteria	Candidatus Levybacteria bacterium RIFCSPHIGHO2_01_FULL_40_10
1	cellular organisms	Bacteria	Patescibacteria group	Parcubacteria group	Candidatus Harrisonbacteria	Candidatus Harrisonbacteria bacterium CG10_big_fil_rev_8_21_14_0_10_49_15
3	cellular organisms	Bacteria	Patescibacteria group	Microgenomates group	Candidatus Gottesmanbacteria	Candidatus Gottesmanbacteria bacterium RIFCSPHIGHO2_02_FULL_40_13
2	cellular organisms	Bacteria	Patescibacteria group	Parcubacteria group	Candidatus Andersenbacteria	Candidatus Andersenbacteria bacterium RIFCSPHIGHO2_12_FULL_45_11b
8	cellular organisms	Bacteria	Candidatus Saccharibacteria	unclassified Saccharibacteria	Candidatus Saccharibacteria bacterium RAAC3_TM7_1
19	cellular organisms	Bacteria	candidate division NC10	unclassified candidate division NC10
5	cellular organisms	Bacteria	Patescibacteria group	Parcubacteria group	unclassified Parcubacteria group	Parcubacteria group bacterium RIFCSPHIGHO2_01_FULL_56_18
19	cellular organisms	Bacteria	Patescibacteria group	Microgenomates group	Candidatus Levybacteria
1	cellular organisms	Bacteria	Patescibacteria group	Parcubacteria group	unclassified Parcubacteria group	Parcubacteria group bacterium Gr01-1014_44
34	cellular organisms	Bacteria	Candidatus Rokubacteria	Candidatus Rokubacteria bacterium GWC2_70_16
13	cellular organisms	Bacteria	Candidatus Aminicenantes	unclassified Aminicenantes	Candidatus Aminicenantes bacterium RBG_16_63_16
4	cellular organisms	Bacteria	Patescibacteria group	Parcubacteria group	unclassified Parcubacteria group	Parcubacteria group bacterium GW2011_GWA1_59_11
1	cellular organisms	Bacteria	Patescibacteria group	Microgenomates group	Candidatus Collierbacteria	Candidatus Collierbacteria bacterium GW2011_GWA2_46_26
2	cellular organisms	Bacteria	Candidatus Schekmanbacteria	Candidatus Schekmanbacteria bacterium GWA2_38_11
3	cellular organisms	Bacteria	Patescibacteria group	Parcubacteria group	Candidatus Uhrbacteria	Candidatus Uhrbacteria bacterium GW2011_GWD2_52_7
1	cellular organisms	Bacteria	Patescibacteria group	Parcubacteria group	Candidatus Buchananbacteria	Candidatus Buchananbacteria bacterium RIFCSPHIGHO2_01_FULL_39_14
17	cellular organisms	Bacteria	Candidatus Saccharibacteria
1	cellular organisms	Bacteria	Patescibacteria group	Parcubacteria group	Candidatus Lloydbacteria	Candidatus Lloydbacteria bacterium RIFCSPLOWO2_02_FULL_51_11
1	cellular organisms	Bacteria	Patescibacteria group	Microgenomates group	Candidatus Gottesmanbacteria	Candidatus Gottesmanbacteria bacterium RIFCSPHIGHO2_01_FULL_39_10
2	cellular organisms	Bacteria	Candidatus Aminicenantes	unclassified Aminicenantes	Candidatus Aminicenantes bacterium 4484_214
2	cellular organisms	Bacteria	candidate division TA06	candidate division TA06 bacterium DG_78
1	cellular organisms	Bacteria	Candidatus Peregrinibacteria	Candidatus Peribacteria	unclassified Candidatus Peribacteria	Candidatus Peribacteria bacterium RIFCSPHIGHO2_01_FULL_51_35
1	cellular organisms	Bacteria	Candidatus Abawacabacteria	Candidatus Abawacabacteria bacterium RIFCSPHIGHO2_01_FULL_46_8
2	cellular organisms	Bacteria	Patescibacteria group	Parcubacteria group	unclassified Parcubacteria group	Parcubacteria group bacterium Gr01-1014_38
9	cellular organisms	Bacteria	Candidatus Rokubacteria	Candidatus Rokubacteria bacterium GWA2_73_35
1	cellular organisms	Bacteria	Candidatus Saccharibacteria	unclassified Saccharibacteria	Candidatus Saccharibacteria bacterium FS07P-B
1	cellular organisms	Bacteria	Candidatus Rokubacteria	Candidatus Rokubacteria bacterium 13_1_40CM_4_69_39
1	cellular organisms	Bacteria	Patescibacteria group	Microgenomates group	Candidatus Roizmanbacteria	Candidatus Roizmanbacteria bacterium RIFCSPLOWO2_01_FULL_45_11
1	cellular organisms	Bacteria	Patescibacteria group	Parcubacteria group	unclassified Parcubacteria group	Parcubacteria group bacterium Greene0714_36
1	cellular organisms	Bacteria	Patescibacteria group	Microgenomates group	Candidatus Collierbacteria	Candidatus Collierbacteria bacterium RIFCSPHIGHO2_02_FULL_49_10
1	cellular organisms	Bacteria	Patescibacteria group	Parcubacteria group	Candidatus Magasanikbacteria	Candidatus Magasanikbacteria bacterium RIFCSPHIGHO2_01_FULL_47_8
1	cellular organisms	Bacteria	Patescibacteria group	Parcubacteria group	unclassified Parcubacteria group	Parcubacteria group bacterium GW2011_GWA2_48_9
1	cellular organisms	Bacteria	Patescibacteria group	Parcubacteria group	Candidatus Kaiserbacteria	Candidatus Kaiserbacteria bacterium GW2011_GWA2_52_12
9	cellular organisms	Bacteria	Patescibacteria group	Microgenomates group	Candidatus Gottesmanbacteria
1	cellular organisms	Bacteria	Patescibacteria group	Microgenomates group	Candidatus Chisholmbacteria	Candidatus Chisholmbacteria bacterium RIFCSPHIGHO2_01_FULL_48_12
3	cellular organisms	Bacteria	Patescibacteria group	Parcubacteria group	Candidatus Kaiserbacteria	Candidatus Kaiserbacteria bacterium RIFCSPLOWO2_01_FULL_53_17
3	cellular organisms	Bacteria	Candidatus Eisenbacteria	Candidatus Eisenbacteria bacterium RBG_19FT_COMBO_70_11
5	cellular organisms	Bacteria	Candidatus Peregrinibacteria	unclassified Candidatus Peregrinibacteria	Candidatus Peregrinibacteria bacterium CG10_big_fil_rev_8_21_14_0_10_42_8
1	cellular organisms	Bacteria	Patescibacteria group	Parcubacteria group	Candidatus Uhrbacteria	Candidatus Uhrbacteria bacterium CG_4_9_14_3_um_filter_36_7
2	cellular organisms	Bacteria	Patescibacteria group	Parcubacteria group	Candidatus Vogelbacteria	Candidatus Vogelbacteria bacterium RIFOXYD1_FULL_46_19
1	cellular organisms	Bacteria	Patescibacteria group	Parcubacteria group	unclassified Parcubacteria group	Parcubacteria group bacterium Gr01-1014_17
1	cellular organisms	Bacteria	Candidatus Peregrinibacteria	Candidatus Peribacteria	unclassified Candidatus Peribacteria	Candidatus Peribacteria bacterium RIFCSPHIGHO2_12_FULL_55_11
10	cellular organisms	Bacteria	Candidatus Schekmanbacteria	Candidatus Schekmanbacteria bacterium RBG_13_48_7
1	cellular organisms	Bacteria	Patescibacteria group	Parcubacteria group	Candidatus Tagabacteria
1	cellular organisms	Bacteria	Patescibacteria group	Parcubacteria group	Candidatus Kaiserbacteria	Candidatus Kaiserbacteria bacterium RIFCSPLOWO2_01_FULL_54_13
2	cellular organisms	Bacteria	Patescibacteria group	Parcubacteria group	Candidatus Yanofskybacteria	Candidatus Yanofskybacteria bacterium CG10_big_fil_rev_8_21_14_0_10_46_23
3	cellular organisms	Bacteria	Patescibacteria group	Microgenomates group	Candidatus Blackburnbacteria
1	cellular organisms	Bacteria	Patescibacteria group	Parcubacteria group	Candidatus Komeilibacteria	Candidatus Komeilibacteria bacterium RIFCSPLOWO2_01_FULL_52_15
1	cellular organisms	Bacteria	candidate division SR1	candidate division SR1 bacterium
9	cellular organisms	Bacteria	Patescibacteria group	Parcubacteria group	Candidatus Kaiserbacteria	Candidatus Kaiserbacteria bacterium CG10_big_fil_rev_8_21_14_0_10_47_16
1	cellular organisms	Bacteria	Patescibacteria group	Parcubacteria group	Candidatus Nomurabacteria	Candidatus Nomurabacteria bacterium CG10_big_fil_rev_8_21_14_0_10_35_16
1	cellular organisms	Bacteria	Patescibacteria group	Parcubacteria group	Candidatus Vogelbacteria	Candidatus Vogelbacteria bacterium RIFOXYD2_FULL_44_9
23	cellular organisms	Bacteria	Candidatus Eisenbacteria
11	cellular organisms	Bacteria	Candidatus Dependentiae	unclassified Candidatus Dependentiae	Candidatus Dependentiae bacterium ADurb.Bin331
9	cellular organisms	Bacteria	Candidatus Peregrinibacteria	unclassified Candidatus Peregrinibacteria	Candidatus Peregrinibacteria bacterium Gr01-1014_25
3	cellular organisms	Bacteria	Patescibacteria group	Microgenomates group	Candidatus Gottesmanbacteria	Candidatus Gottesmanbacteria bacterium GW2011_GWA1_43_11
1	cellular organisms	Bacteria	Candidatus Wirthbacteria	Candidatus Wirthbacteria bacterium CG2_30_54_11
2	cellular organisms	Bacteria	Patescibacteria group	Parcubacteria group	Candidatus Moranbacteria	Candidatus Moranbacteria bacterium RBG_19FT_COMBO_42_6
2	cellular organisms	Bacteria	Candidatus Saccharibacteria	unclassified Saccharibacteria	Candidatus Saccharibacteria bacterium RIFCSPHIGHO2_12_FULL_47_17
3	cellular organisms	Bacteria	Patescibacteria group	Parcubacteria group	Candidatus Terrybacteria
4	cellular organisms	Bacteria	Candidatus Riflebacteria	Candidatus Riflebacteria bacterium HGW-Riflebacteria-2
17	cellular organisms	Bacteria	Patescibacteria group	Microgenomates group	Candidatus Daviesbacteria
5	cellular organisms	Bacteria	Candidatus Saccharibacteria	candidate division TM7 genomosp. GTL1
1	cellular organisms	Bacteria	Patescibacteria group	Parcubacteria group	Candidatus Falkowbacteria	Candidatus Falkowbacteria bacterium RIFCSPHIGHO2_02_FULL_45_15
8	cellular organisms	Bacteria	Patescibacteria group	Parcubacteria group	Candidatus Parcubacteria	unclassified Parcubacteria	Parcubacteria bacterium OLB19
1	cellular organisms	Bacteria	Candidatus Atribacteria	unclassified Atribacteria	Candidatus Atribacteria bacterium ADurb.Bin276
4	cellular organisms	Bacteria	Patescibacteria group	Microgenomates group	Candidatus Beckwithbacteria
2	cellular organisms	Bacteria	Patescibacteria group	Parcubacteria group	unclassified Parcubacteria group	Parcubacteria group bacterium Gr01-1014_20
1	cellular organisms	Bacteria	Patescibacteria group	Parcubacteria group	unclassified Parcubacteria group	Parcubacteria group bacterium GW2011_GWA1_40_21
3	cellular organisms	Bacteria	Patescibacteria group	Parcubacteria group	Candidatus Liptonbacteria	Candidatus Liptonbacteria bacterium RIFCSPLOWO2_01_FULL_52_25
1	cellular organisms	Bacteria	Patescibacteria group	Parcubacteria group	unclassified Parcubacteria group	Parcubacteria group bacterium GW2011_GWA2_51_10
3	cellular organisms	Bacteria	Candidatus Aminicenantes	Candidatus Saccharicenans	Candidatus Saccharicenans subterraneum
1	cellular organisms	Bacteria	Patescibacteria group	Parcubacteria group	Candidatus Sungbacteria	Candidatus Sungbacteria bacterium GWC2_49_10
11	cellular organisms	Bacteria	Candidatus Dependentiae	unclassified Candidatus Dependentiae	candidate division TM6 bacterium GW2011_GWF2_30_66
1	cellular organisms	Bacteria	Patescibacteria group	Parcubacteria group	Candidatus Campbellbacteria	Candidatus Campbellbacteria bacterium RIFOXYC2_FULL_35_25
4	cellular organisms	Bacteria	Patescibacteria group	Parcubacteria group	Candidatus Buchananbacteria
3	cellular organisms	Bacteria	Patescibacteria group	Microgenomates group	unclassified Microgenomates group	unclassified Microgenomates group (miscellaneous)	Microgenomates group bacterium RBG_16_45_19
5	cellular organisms	Bacteria	Candidatus Goldbacteria	unclassified Candidatus Goldbacteria	Candidatus Goldbacteria bacterium HGW-Goldbacteria-1
48	cellular organisms	Bacteria	Candidatus Handelsmanbacteria	Candidatus Handelsmanbacteria bacterium RIFCSPLOWO2_12_FULL_64_10
1	cellular organisms	Bacteria	Patescibacteria group	Parcubacteria group	unclassified Parcubacteria group	Parcubacteria group bacterium CG23_combo_of_CG06-09_8_20_14_all_35_9
2	cellular organisms	Bacteria	Patescibacteria group	Microgenomates group	unclassified Microgenomates group	unclassified Microgenomates group (miscellaneous)	Microgenomates group bacterium Gr01-1014_7
5	cellular organisms	Bacteria	Candidatus Delongbacteria	Candidatus Delongbacteria bacterium GWF2_40_14
1	cellular organisms	Bacteria	Patescibacteria group	Microgenomates group	Candidatus Levybacteria	Candidatus Levybacteria bacterium RIFCSPLOWO2_02_FULL_37_18
174	cellular organisms	Bacteria	Candidatus Eisenbacteria	Candidatus Eisenbacteria bacterium
28	cellular organisms	Bacteria	Patescibacteria group	Parcubacteria group	Candidatus Nomurabacteria
1	cellular organisms	Bacteria	candidate division CPR3
1	cellular organisms	Bacteria	Patescibacteria group	Microgenomates group	Candidatus Levybacteria	Candidatus Levybacteria bacterium RIFCSPLOWO2_01_FULL_42_15
3	cellular organisms	Bacteria	Patescibacteria group	Parcubacteria group	unclassified Parcubacteria group	Parcubacteria group bacterium Athens0416_74
13	cellular organisms	Bacteria	Candidatus Rokubacteria	Candidatus Rokubacteria bacterium RIFCSPLOWO2_12_FULL_71_19
2	cellular organisms	Bacteria	Patescibacteria group	Microgenomates group	unclassified Microgenomates group	unclassified Microgenomates group (miscellaneous)	Microgenomates group bacterium LiPW_16
5	cellular organisms	Bacteria	Candidatus Saccharibacteria	unclassified Saccharibacteria	Candidatus Saccharibacteria bacterium 47-87
1	cellular organisms	Bacteria	Candidatus Riflebacteria	Candidatus Riflebacteria bacterium GWC2_50_8
9	cellular organisms	Bacteria	Candidatus Aminicenantes	unclassified Aminicenantes	Candidatus Aminicenantes bacterium ADurb.Bin147
1	cellular organisms	Bacteria	Patescibacteria group	Microgenomates group	Candidatus Woesebacteria	Candidatus Woesebacteria bacterium RIFCSPHIGHO2_12_FULL_44_11
17	cellular organisms	Bacteria	candidate division CPR2	candidate division CPR2 bacterium GW2011_GWC1_41_48
1	cellular organisms	Bacteria	candidate division WWE3	candidate division WWE3 bacterium GW2011_GWB1_44_4
4	cellular organisms	Bacteria	Patescibacteria group	Parcubacteria group	Candidatus Andersenbacteria
1	cellular organisms	Bacteria	Patescibacteria group	Parcubacteria group	Candidatus Magasanikbacteria	Candidatus Magasanikbacteria bacterium RIFOXYC2_FULL_39_8
2	cellular organisms	Bacteria	Patescibacteria group	Parcubacteria group	unclassified Parcubacteria group	Parcubacteria group bacterium Gr01-1014_91
7	cellular organisms	Bacteria	Candidatus Rokubacteria	Candidatus Rokubacteria bacterium RIFCSPLOWO2_02_FULL_72_37
13	cellular organisms	Bacteria	Candidatus Peregrinibacteria	unclassified Candidatus Peregrinibacteria	Candidatus Peregrinibacteria bacterium Greene0416_19
1	cellular organisms	Bacteria	candidate division SR1	candidate division SR1 bacterium CG_4_9_14_3_um_filter_40_9
1	cellular organisms	Bacteria	Candidatus Saccharibacteria	TM7 phylum sp. oral taxon 353
3	cellular organisms	Bacteria	candidate division NC10	unclassified candidate division NC10	candidate division NC10 bacterium RIFCSPLOWO2_12_FULL_66_18
1	cellular organisms	Bacteria	Candidatus Dojkabacteria	candidate division WS6 bacterium GW2011_GWA2_37_6
1	cellular organisms	Bacteria	Candidatus Dependentiae	unclassified Candidatus Dependentiae	candidate division TM6 bacterium GW2011_GWF2_43_17
3	cellular organisms	Bacteria	candidate division NC10	Candidatus Methylomirabilis
17	cellular organisms	Bacteria	candidate division NC10	unclassified candidate division NC10	candidate division NC10 bacterium CSP1-5
6	cellular organisms	Bacteria	Patescibacteria group	Parcubacteria group	Candidatus Kaiserbacteria	Candidatus Kaiserbacteria bacterium CG_4_8_14_3_um_filter_38_9
8	cellular organisms	Bacteria	Patescibacteria group	Parcubacteria group	Candidatus Adlerbacteria	Candidatus Adlerbacteria bacterium RIFCSPHIGHO2_02_FULL_52_17
2	cellular organisms	Bacteria	Candidatus Coatesbacteria	Candidatus Coatesbacteria bacterium RBG_13_66_14
1	cellular organisms	Bacteria	Patescibacteria group	Parcubacteria group	unclassified Parcubacteria group	Parcubacteria group bacterium Athens0714_26
11	cellular organisms	Bacteria	Candidatus Desantisbacteria
1	cellular organisms	Bacteria	Patescibacteria group	Parcubacteria group	Candidatus Colwellbacteria	Candidatus Colwellbacteria bacterium RIFCSPLOWO2_01_FULL_48_10
9	cellular organisms	Bacteria	Candidatus Riflebacteria	Candidatus Ozemobacteria	Candidatus Ozemobacterales	Candidatus Ozemobacteraceae	Candidatus Ozemobacter	Candidatus Ozemobacter sibiricus
4	cellular organisms	Bacteria	Candidatus Rokubacteria	Candidatus Rokubacteria bacterium 13_1_20CM_2_70_7
1	cellular organisms	Bacteria	Candidatus Peregrinibacteria	unclassified Candidatus Peregrinibacteria	Candidatus Peregrinibacteria bacterium GW2011_GWF2_39_17
4	cellular organisms	Bacteria	Candidatus Riflebacteria	Candidatus Riflebacteria bacterium HGW-Riflebacteria-1
1	cellular organisms	Bacteria	Patescibacteria group	Microgenomates group	Candidatus Microgenomates	unclassified Microgenomates	Microgenomates bacterium UTCPR1
3	cellular organisms	Bacteria	candidate division GN15	candidate division GN15 bacterium
3	cellular organisms	Bacteria	Candidatus Saccharibacteria	unclassified Saccharibacteria	Candidatus Saccharibacteria bacterium RIFCSPHIGHO2_12_FULL_41_12
3	cellular organisms	Bacteria	Candidatus Doudnabacteria	Candidatus Doudnabacteria bacterium RIFCSPHIGHO2_01_FULL_50_11
1	cellular organisms	Bacteria	Patescibacteria group	Microgenomates group	Candidatus Woykebacteria	Candidatus Woykebacteria bacterium RIFCSPLOWO2_01_FULL_41_12
1	cellular organisms	Bacteria	Patescibacteria group	Microgenomates group	Candidatus Levybacteria	Candidatus Levybacteria bacterium
6	cellular organisms	Bacteria	Patescibacteria group	Parcubacteria group	Candidatus Komeilibacteria
14	cellular organisms	Bacteria	Patescibacteria group	Microgenomates group	Candidatus Roizmanbacteria
1	cellular organisms	Bacteria	Patescibacteria group	Parcubacteria group	Candidatus Jacksonbacteria	Candidatus Jacksonbacteria bacterium RIFCSPHIGHO2_02_FULL_43_10
1	cellular organisms	Bacteria	Patescibacteria group	Parcubacteria group	unclassified Parcubacteria group	Parcubacteria group bacterium GW2011_GWA2_47_10
2	cellular organisms	Bacteria	Patescibacteria group	Parcubacteria group	Candidatus Buchananbacteria	Candidatus Buchananbacteria bacterium CG10_big_fil_rev_8_21_14_0_10_42_9
3	cellular organisms	Bacteria	Patescibacteria group	Microgenomates group	Candidatus Gottesmanbacteria	Candidatus Gottesmanbacteria bacterium GW2011_GWA2_43_14
1	cellular organisms	Bacteria	Patescibacteria group	Parcubacteria group	Candidatus Nomurabacteria	Candidatus Nomurabacteria bacterium RIFCSPHIGHO2_02_FULL_42_19
4	cellular organisms	Bacteria	Patescibacteria group	Parcubacteria group	Candidatus Kerfeldbacteria	Candidatus Kerfeldbacteria bacterium CG_4_10_14_0_8_um_filter_42_10
1	cellular organisms	Bacteria	Patescibacteria group	Parcubacteria group	Candidatus Uhrbacteria	Candidatus Uhrbacteria bacterium RIFCSPLOWO2_02_FULL_54_37
1	cellular organisms	Bacteria	Patescibacteria group	Microgenomates group	Candidatus Collierbacteria	Candidatus Collierbacteria bacterium CG10_big_fil_rev_8_21_14_0_10_44_9
2	cellular organisms	Bacteria	Patescibacteria group	Parcubacteria group	Candidatus Parcubacteria	unclassified Parcubacteria	Parcubacteria bacterium C7867-007
8	cellular organisms	Bacteria	Candidatus Edwardsbacteria
5	cellular organisms	Bacteria	candidate division TA06
11	cellular organisms	Bacteria	Patescibacteria group	Parcubacteria group	Candidatus Moranbacteria
2	cellular organisms	Bacteria	Patescibacteria group	Microgenomates group	Candidatus Gottesmanbacteria	Candidatus Gottesmanbacteria bacterium RBG_13_45_10
2	cellular organisms	Bacteria	Patescibacteria group	Microgenomates group	Candidatus Curtissbacteria	Candidatus Curtissbacteria bacterium RIFCSPHIGHO2_01_FULL_41_11
2	cellular organisms	Bacteria	Candidatus Saccharibacteria	Candidatus Saccharimonas	Candidatus Saccharimonas aalborgensis
1	cellular organisms	Bacteria	Candidatus Peregrinibacteria	Candidatus Peribacteria	unclassified Candidatus Peribacteria	Candidatus Peribacteria bacterium RIFCSPHIGHO2_01_FULL_55_13
1	cellular organisms	Bacteria	Patescibacteria group	Parcubacteria group	unclassified Parcubacteria group	Parcubacteria group bacterium Gr01-1014_107
13	cellular organisms	Bacteria	Candidatus Rokubacteria	Candidatus Rokubacteria bacterium RIFCSPLOWO2_12_FULL_69_21
1	cellular organisms	Bacteria	candidate division WOR-3	candidate division WOR-3 bacterium 4484_100
1	cellular organisms	Bacteria	Candidatus Berkelbacteria	Candidatus Berkelbacteria bacterium CG2_30_43_20
7	cellular organisms	Bacteria	Patescibacteria group	Parcubacteria group	Candidatus Taylorbacteria
17	cellular organisms	Bacteria	Candidatus Peregrinibacteria	Candidatus Peribacteria	unclassified Candidatus Peribacteria
7	cellular organisms	Bacteria	Patescibacteria group	Microgenomates group	Candidatus Shapirobacteria
3	cellular organisms	Bacteria	candidate division TA06	candidate division TA06 bacterium DG_26
4	cellular organisms	Bacteria	candidate division NC10	unclassified candidate division NC10	candidate division NC10 bacterium RIFCSPLOWO2_02_FULL_66_22
4	cellular organisms	Bacteria	Patescibacteria group	Parcubacteria group	Candidatus Vogelbacteria	Candidatus Vogelbacteria bacterium RIFOXYD1_FULL_44_32
6	cellular organisms	Bacteria	Candidatus Glassbacteria	Candidatus Glassbacteria bacterium RIFCSPLOWO2_12_FULL_58_11
2	cellular organisms	Bacteria	Patescibacteria group	Parcubacteria group	Candidatus Yanofskybacteria	Candidatus Yanofskybacteria bacterium RIFCSPLOWO2_01_FULL_42_49
13	cellular organisms	Bacteria	Candidatus Lindowbacteria
3	cellular organisms	Bacteria	Candidatus Schekmanbacteria	Candidatus Schekmanbacteria bacterium RBG_16_38_10
6	cellular organisms	Bacteria	Candidatus Rokubacteria	Candidatus Rokubacteria bacterium RIFCSPHIGHO2_02_FULL_73_26
2	cellular organisms	Bacteria	Candidatus Bipolaricaulota	Candidatus Acetothermum	Candidatus Acetothermum autotrophicum
2	cellular organisms	Bacteria	Patescibacteria group	Parcubacteria group	Candidatus Parcubacteria	unclassified Parcubacteria	Parcubacteria bacterium C7867-004
5	cellular organisms	Bacteria	Patescibacteria group	Microgenomates group	Candidatus Woesebacteria	Candidatus Woesebacteria bacterium GW2011_GWB1_45_5
77	cellular organisms	Bacteria	Candidatus Poribacteria	Candidatus Poribacteria bacterium
4	cellular organisms	Bacteria	candidate division SR1	candidate division SR1 bacterium Aalborg_AAW-1
32	cellular organisms	Bacteria	Patescibacteria group	Microgenomates group
1	cellular organisms	Bacteria	Patescibacteria group	Parcubacteria group	Candidatus Giovannonibacteria	Candidatus Giovannonibacteria bacterium RIFCSPLOWO2_01_FULL_46_13
5	cellular organisms	Bacteria	Candidatus Saccharibacteria	unclassified Saccharibacteria	Candidatus Saccharibacteria bacterium RIFCSPHIGHO2_12_FULL_47_16b
5	cellular organisms	Bacteria	Candidatus Lindowbacteria	Candidatus Lindowbacteria bacterium RIFCSPLOWO2_12_FULL_62_27
2	cellular organisms	Bacteria	Patescibacteria group	Parcubacteria group	Candidatus Falkowbacteria	Candidatus Falkowbacteria bacterium HGW-Falkowbacteria-1
5	cellular organisms	Bacteria	Candidatus Aminicenantes	unclassified Aminicenantes	Candidatus Aminicenantes bacterium RBG_19FT_COMBO_65_30
1	cellular organisms	Bacteria	Candidatus Peregrinibacteria	unclassified Candidatus Peregrinibacteria	Candidatus Peregrinibacteria bacterium CG1_02_54_53
1	cellular organisms	Bacteria	Patescibacteria group	Parcubacteria group	unclassified Parcubacteria group	Parcubacteria group bacterium Gr01-1014_46
5	cellular organisms	Bacteria	Candidatus Rokubacteria	Candidatus Rokubacteria bacterium GWC2_70_24
1	cellular organisms	Bacteria	Patescibacteria group	Parcubacteria group	Candidatus Azambacteria	Candidatus Azambacteria bacterium RBG_16_47_10
1	cellular organisms	Bacteria	Patescibacteria group	Parcubacteria group	Candidatus Nomurabacteria	Candidatus Nomurabacteria bacterium GW2011_GWA2_40_9
10	cellular organisms	Bacteria	Candidatus Dadabacteria	Candidatus Dadabacteria bacterium RIFCSPHIGHO2_12_FULL_53_21
4	cellular organisms	Bacteria	Patescibacteria group	Parcubacteria group	Candidatus Kaiserbacteria	Candidatus Kaiserbacteria bacterium RIFCSPHIGHO2_02_FULL_49_34
1	cellular organisms	Bacteria	Patescibacteria group	Parcubacteria group	unclassified Parcubacteria group	Parcubacteria group bacterium GW2011_GWA2_56_21
2	cellular organisms	Bacteria	Candidatus Fraserbacteria	Candidatus Fraserbacteria bacterium RBG_16_55_9
7	cellular organisms	Bacteria	Candidatus Peregrinibacteria	unclassified Candidatus Peregrinibacteria	Candidatus Peregrinibacteria bacterium CG10_big_fil_rev_8_21_14_0_10_55_24
6	cellular organisms	Bacteria	Candidatus Dependentiae	unclassified Candidatus Dependentiae	candidate division TM6 bacterium GW2011_GWE2_42_60
1	cellular organisms	Bacteria	Patescibacteria group	Microgenomates group	Candidatus Daviesbacteria	Candidatus Daviesbacteria bacterium GW2011_GWA2_39_33
1	cellular organisms	Bacteria	Patescibacteria group	Parcubacteria group	Candidatus Spechtbacteria	Candidatus Spechtbacteria bacterium RIFCSPLOWO2_02_FULL_38_8
1	cellular organisms	Bacteria	Patescibacteria group	Parcubacteria group	Candidatus Falkowbacteria	Candidatus Falkowbacteria bacterium RIFOXYD2_FULL_35_9
25	cellular organisms	Bacteria	Candidatus Saccharibacteria	unclassified Saccharibacteria	Candidatus Saccharibacteria bacterium YM_S32_TM7_50_20
8	cellular organisms	Bacteria	Candidatus Berkelbacteria
1	cellular organisms	Bacteria	Patescibacteria group	Microgenomates group	Candidatus Levybacteria	Candidatus Levybacteria bacterium RIFCSPHIGHO2_01_FULL_38_26
9	cellular organisms	Bacteria	Candidatus Rokubacteria	Candidatus Rokubacteria bacterium 13_1_40CM_69_27
1	cellular organisms	Bacteria	candidate division KD3-62	candidate division KD3-62 bacterium DG_56
1	cellular organisms	Bacteria	Patescibacteria group	Parcubacteria group	Candidatus Liptonbacteria	Candidatus Liptonbacteria bacterium RIFCSPLOWO2_01_FULL_45_15
2	cellular organisms	Bacteria	Patescibacteria group	Parcubacteria group	Candidatus Taylorbacteria	Candidatus Taylorbacteria bacterium RIFCSPHIGHO2_01_FULL_51_15
2	cellular organisms	Bacteria	Patescibacteria group	Parcubacteria group	Candidatus Taylorbacteria	Candidatus Taylorbacteria bacterium RIFCSPHIGHO2_02_FULL_46_13
1	cellular organisms	Bacteria	Patescibacteria group	Microgenomates group	Candidatus Pacebacteria	Candidatus Pacebacteria bacterium CG_4_10_14_0_8_um_filter_42_14
2	cellular organisms	Bacteria	Candidatus Rokubacteria	Candidatus Rokubacteria bacterium 13_1_20CM_4_68_9
2	cellular organisms	Bacteria	Candidatus Saccharibacteria	unclassified Saccharibacteria	Candidatus Saccharibacteria bacterium RIFCSPLOWO2_02_FULL_46_7
1	cellular organisms	Bacteria	Patescibacteria group	Parcubacteria group	Candidatus Kaiserbacteria	Candidatus Kaiserbacteria bacterium RIFCSPHIGHO2_01_FULL_54_36
1	cellular organisms	Bacteria	Candidatus Peregrinibacteria	Candidatus Peribacteria
10	cellular organisms	Bacteria	Patescibacteria group	Parcubacteria group	Candidatus Moranbacteria	Candidatus Moranbacteria bacterium GW2011_GWC2_45_10
5	cellular organisms	Bacteria	Candidatus Rokubacteria	Candidatus Rokubacteria bacterium GWF2_70_14
1	cellular organisms	Bacteria	Patescibacteria group	Parcubacteria group	unclassified Parcubacteria group	Parcubacteria group bacterium Gr01-1014_70
2	cellular organisms	Bacteria	Candidatus Rokubacteria	Candidatus Rokubacteria bacterium RIFCSPHIGHO2_12_FULL_73_22
5	cellular organisms	Bacteria	Candidatus Saccharibacteria	unclassified Saccharibacteria	Candidatus Saccharibacteria bacterium HGW-Saccharibacteria-1
4	cellular organisms	Bacteria	Patescibacteria group	Parcubacteria group	Candidatus Ryanbacteria	Candidatus Ryanbacteria bacterium CG10_big_fil_rev_8_21_14_0_10_43_42
1	cellular organisms	Bacteria	Candidatus Peregrinibacteria	unclassified Candidatus Peregrinibacteria	Candidatus Peregrinibacteria bacterium GW2011_GWF2_38_29
2	cellular organisms	Bacteria	candidate division WWE3	candidate division WWE3 bacterium CG08_land_8_20_14_0_20_40_13
2	cellular organisms	Bacteria	Candidatus Atribacteria	unclassified Atribacteria	Candidatus Atribacteria bacterium HGW-Atribacteria-1
9	cellular organisms	Bacteria	candidate division NC10	Candidatus Methylomirabilis	Candidatus Methylomirabilis lanthanidiphila
3	cellular organisms	Bacteria	Candidatus Rokubacteria	Candidatus Rokubacteria bacterium 13_2_20CM_69_15_2
2	cellular organisms	Bacteria	Candidatus Doudnabacteria	Candidatus Doudnabacteria bacterium RIFCSPHIGHO2_01_FULL_43_23
1	cellular organisms	Bacteria	Patescibacteria group	Parcubacteria group	Candidatus Magasanikbacteria	Candidatus Magasanikbacteria bacterium RIFOXYA2_FULL_44_8
6	cellular organisms	Bacteria	Patescibacteria group	Parcubacteria group	Candidatus Nomurabacteria	Candidatus Nomurabacteria bacterium RIFCSPLOWO2_01_FULL_40_15
1	cellular organisms	Bacteria	Candidatus Schekmanbacteria	Candidatus Schekmanbacteria bacterium RBG_16_38_11
3	cellular organisms	Bacteria	Patescibacteria group	Microgenomates group	Candidatus Microgenomates	unclassified Microgenomates	Microgenomates bacterium OLB22
2	cellular organisms	Bacteria	Candidatus Firestonebacteria
1	cellular organisms	Bacteria	candidate division TA06	candidate division TA06 bacterium B3_TA06
13	cellular organisms	Bacteria	Candidatus Dependentiae	unclassified Candidatus Dependentiae	Candidatus Dependentiae bacterium (ex Spumella elongata CCAP 955/1)
1	cellular organisms	Bacteria	Candidatus Saccharibacteria	unclassified Saccharibacteria	Candidatus Saccharibacteria bacterium RIFCSPLOWO2_01_FULL_48_13
1	cellular organisms	Bacteria	Patescibacteria group	Parcubacteria group	Candidatus Nomurabacteria	Candidatus Nomurabacteria bacterium GW2011_GWB1_47_6
3	cellular organisms	Bacteria	Patescibacteria group	Parcubacteria group	unclassified Parcubacteria group	Parcubacteria group bacterium GW2011_GWF2_44_8
1	cellular organisms	Bacteria	Patescibacteria group	Microgenomates group	Candidatus Collierbacteria	Candidatus Collierbacteria bacterium GW2011_GWF1_42_50
2	cellular organisms	Bacteria	Candidatus Dependentiae	unclassified Candidatus Dependentiae	candidate division TM6 bacterium GW2011_GWF2_38_10
7	cellular organisms	Bacteria	Candidatus Rokubacteria	Candidatus Rokubacteria bacterium RBG_16_73_20
1	cellular organisms	Bacteria	Patescibacteria group	Parcubacteria group	Candidatus Uhrbacteria	Candidatus Uhrbacteria bacterium CG_4_9_14_3_um_filter_50_9
8	cellular organisms	Bacteria	candidate division KSB1	unclassified candidate division KSB1	candidate division KSB1 bacterium RBG_16_48_16
1	cellular organisms	Bacteria	Candidatus Dependentiae	unclassified Candidatus Dependentiae	candidate division TM6 bacterium GW2011_GWE2_41_16
5	cellular organisms	Bacteria	Patescibacteria group	Parcubacteria group	Candidatus Nomurabacteria	Candidatus Nomurabacteria bacterium GW2011_GWB1_37_5
21	cellular organisms	Bacteria	unclassified Bacteria	Candidatus Moduliflexus	Candidatus Moduliflexus flocculans
19	cellular organisms	Bacteria	unclassified Bacteria	Candidatus Vecturithrix	Candidatus Vecturithrix granuli
1	cellular organisms	Bacteria	unclassified Bacteria	Isachenkonia	Isachenkonia alkalipeptolytica
17	cellular organisms	Bacteria	unclassified Bacteria	Natronospirillum	Natronospirillum operossus
1	cellular organisms	Bacteria	unclassified Bacteria	unclassified Bacteria (miscellaneous)	bacterium BMS3Abin15
1	cellular organisms	Bacteria	unclassified Bacteria	unclassified Bacteria (miscellaneous)	bacterium ADurb.BinA186
2	cellular organisms	Bacteria	unclassified Bacteria	unclassified Bacteria (miscellaneous)	bacterium M00.F.Ca.ET.152.01.1.1
1	cellular organisms	Bacteria	unclassified Bacteria	unclassified Bacteria (miscellaneous)	bacterium M00.F.Ca.ET.227.01.1.1
1	cellular organisms	Bacteria	unclassified Bacteria	unclassified Bacteria (miscellaneous)	bacterium BMS3Abin08
1	cellular organisms	Bacteria	unclassified Bacteria	unclassified Bacteria (miscellaneous)	Bathymodiolus brooksi thiotrophic gill symbiont
1	cellular organisms	Bacteria	unclassified Bacteria	unclassified Bacteria (miscellaneous)	bacterium symbiont of Plakortis simplex pPS11G3
2	cellular organisms	Bacteria	unclassified Bacteria	unclassified Bacteria (miscellaneous)	bacterium ADurb.Bin212
1	cellular organisms	Bacteria	unclassified Bacteria	unclassified Bacteria (miscellaneous)	bacterium (Candidatus Stahlbacteria) CG23_combo_of_CG06-09_8_20_14_all_40_9
1	cellular organisms	Bacteria	unclassified Bacteria	unclassified Bacteria (miscellaneous)	bacterium D16-51
1	cellular organisms	Bacteria	unclassified Bacteria	unclassified Bacteria (miscellaneous)	bacterium M00.F.Ca.ET.229.01.1.1
2	cellular organisms	Bacteria	unclassified Bacteria	unclassified Bacteria (miscellaneous)	bacterium (Candidatus Ratteibacteria) CG23_combo_of_CG06-09_8_20_14_all_48_7
2	cellular organisms	Bacteria	unclassified Bacteria	unclassified Bacteria (miscellaneous)	bacterium BMS3Bbin05
2	cellular organisms	Bacteria	unclassified Bacteria	unclassified Bacteria (miscellaneous)	bacterium TMED217
5	cellular organisms	Bacteria	unclassified Bacteria	unclassified Bacteria (miscellaneous)	bacterium HR17
1	cellular organisms	Bacteria	unclassified Bacteria	unclassified Bacteria (miscellaneous)	bacterium BM706
1	cellular organisms	Bacteria	unclassified Bacteria	unclassified Bacteria (miscellaneous)	bacterium BMS3Abin07
3	cellular organisms	Bacteria	unclassified Bacteria	unclassified Bacteria (miscellaneous)	bacterium 42_11
2	cellular organisms	Bacteria	unclassified Bacteria	unclassified Bacteria (miscellaneous)	bacterium BMS3Abin12
1	cellular organisms	Bacteria	unclassified Bacteria	unclassified Bacteria (miscellaneous)	bacterium BMS3Bbin14
2	cellular organisms	Bacteria	unclassified Bacteria	unclassified Bacteria (miscellaneous)	bacterium I07
3	cellular organisms	Bacteria	unclassified Bacteria	unclassified Bacteria (miscellaneous)	bacterium BMS3Abin01
5	cellular organisms	Bacteria	unclassified Bacteria	unclassified Bacteria (miscellaneous)	bacterium ADurb.Bin157
2	cellular organisms	Bacteria	unclassified Bacteria	unclassified Bacteria (miscellaneous)	bacterium HR09
3	cellular organisms	Bacteria	unclassified Bacteria	unclassified Bacteria (miscellaneous)	bacterium K02(2017)
1	cellular organisms	Bacteria	unclassified Bacteria	unclassified Bacteria (miscellaneous)	bacterium (Candidatus Blackallbacteria) CG18_big_fil_WC_8_21_14_2_50_49_26
7	cellular organisms	Bacteria	unclassified Bacteria	unclassified Bacteria (miscellaneous)	bacterium HR18
1	cellular organisms	Bacteria	unclassified Bacteria	unclassified Bacteria (miscellaneous)	bacterium BMS3Bbin07
2	cellular organisms	Bacteria	unclassified Bacteria	unclassified Bacteria (miscellaneous)	bacterium BMS3Abin11
1	cellular organisms	Bacteria	unclassified Bacteria	unclassified Bacteria (miscellaneous)	bacterium TMED161
1	cellular organisms	Bacteria	unclassified Bacteria	unclassified Bacteria (miscellaneous)	bacterium endosymbiont of Pedicinus badii
9	cellular organisms	Bacteria	unclassified Bacteria	unclassified Bacteria (miscellaneous)	bacterium endosymbiont of Escarpia laminata
4	cellular organisms	Bacteria	unclassified Bacteria	unclassified Bacteria (miscellaneous)	bacterium (Candidatus Stahlbacteria)
3	cellular organisms	Bacteria	unclassified Bacteria	unclassified Bacteria (miscellaneous)	bacterium TMED178
6	cellular organisms	Bacteria	unclassified Bacteria	unclassified Bacteria (miscellaneous)	bacterium ADurb.Bin236
17	cellular organisms	Bacteria	unclassified Bacteria	unclassified Bacteria (miscellaneous)	bacterium HR24
1	cellular organisms	Bacteria	unclassified Bacteria	unclassified Bacteria (miscellaneous)	bacterium TMED80
1	cellular organisms	Bacteria	unclassified Bacteria	unclassified Bacteria (miscellaneous)	bacterium (Candidatus Howlettbacteria) CG23_combo_of_CG06-09_8_20_14_all_37_9
4	cellular organisms	Bacteria	unclassified Bacteria	unclassified Bacteria (miscellaneous)	bacterium A37T11
9	cellular organisms	Bacteria	unclassified Bacteria	unclassified Bacteria (miscellaneous)	bacterium HR23
9	cellular organisms	Bacteria	unclassified Bacteria	unclassified Bacteria (miscellaneous)	bacterium SCN 62-11
8	cellular organisms	Bacteria	unclassified Bacteria	unclassified Bacteria (miscellaneous)	bacterium BMS3Abin02
14	cellular organisms	Bacteria	unclassified Bacteria	unclassified Bacteria (miscellaneous)	bacterium MnTg04
3	cellular organisms	Bacteria	unclassified Bacteria	unclassified Bacteria (miscellaneous)	bacterium TMED144
1	cellular organisms	Bacteria	unclassified Bacteria	unclassified Bacteria (miscellaneous)	bacterium J17
15	cellular organisms	Bacteria	unclassified Bacteria	unclassified Bacteria (miscellaneous)	'Osedax' symbiont bacterium Rs2_46_30_T18
49	cellular organisms	Bacteria	unclassified Bacteria	unclassified Bacteria (miscellaneous)	bacterium A52C2
75	cellular organisms	Bacteria	unclassified Bacteria	unclassified Bacteria (miscellaneous)	bacterium MnTg02
7	cellular organisms	Bacteria	unclassified Bacteria	unclassified Bacteria (miscellaneous)	bacterium HR39
1	cellular organisms	Bacteria	unclassified Bacteria	unclassified Bacteria (miscellaneous)	bacterium ADurb.Bin400
31	cellular organisms	Bacteria	unclassified Bacteria	unclassified Bacteria (miscellaneous)	bacterium BMS3Bbin02
5	cellular organisms	Bacteria	unclassified Bacteria	unclassified Bacteria (miscellaneous)	bacterium BMS3Abin14
1	cellular organisms	Bacteria	unclassified Bacteria	unclassified Bacteria (miscellaneous)	bacterium TMED190
5	cellular organisms	Bacteria	unclassified Bacteria	unclassified Bacteria (miscellaneous)	bacterium ADurb.Bin374
6	cellular organisms	Bacteria	unclassified Bacteria	unclassified Bacteria (miscellaneous)	bacterium SM23_57
3	cellular organisms	Bacteria	unclassified Bacteria	unclassified Bacteria (miscellaneous)	bacterium HR19
6	cellular organisms	Bacteria	unclassified Bacteria	unclassified Bacteria (miscellaneous)	bacterium MnTg03
1005	cellular organisms	Bacteria	unclassified Bacteria	unclassified Bacteria (miscellaneous)	bacterium
10	cellular organisms	Bacteria	unclassified Bacteria	unclassified Bacteria (miscellaneous)	bacterium DOLZORAL124_64_63
42	cellular organisms	Bacteria	unclassified Bacteria	unclassified Bacteria (miscellaneous)	bacterium YEK0313
4	cellular organisms	Bacteria	unclassified Bacteria	unclassified Bacteria (miscellaneous)	bacterium HR31
10	cellular organisms	Bacteria	unclassified Bacteria	unclassified Bacteria (miscellaneous)	bacterium ADurb.BinA028
7	cellular organisms	Bacteria	unclassified Bacteria	unclassified Bacteria (miscellaneous)	bacterium HR22
28	cellular organisms	Bacteria	unclassified Bacteria	unclassified Bacteria (miscellaneous)	bacterium HR40
3	cellular organisms	Bacteria	unclassified Bacteria	unclassified Bacteria (miscellaneous)	bacterium HR21
62	cellular organisms	Bacteria	unclassified Bacteria	unclassified Bacteria (miscellaneous)	bacterium HR33
27	cellular organisms	Bacteria	unclassified Bacteria	unclassified Bacteria (miscellaneous)	bacterium SCGC AG-212-C10
11	cellular organisms	Bacteria	unclassified Bacteria	unclassified Bacteria (miscellaneous)	bacterium HR16
6	cellular organisms	Bacteria	unclassified Bacteria	unclassified Bacteria (miscellaneous)	bacterium ADurb.Bin431
8	cellular organisms	Bacteria	unclassified Bacteria	unclassified Bacteria (miscellaneous)	bacterium BMS3Bbin01
5	cellular organisms	Bacteria	unclassified Bacteria	unclassified Bacteria (miscellaneous)	bacterium HR32
6	cellular organisms	Bacteria	unclassified Bacteria	unclassified Bacteria (miscellaneous)	bacterium D16-29
85	cellular organisms	Bacteria	unclassified Bacteria	unclassified Bacteria (miscellaneous)	bacterium B66
5	cellular organisms	Bacteria	unclassified Bacteria	unclassified Bacteria (miscellaneous)	Bathymodiolus heckerae thiotrophic gill symbiont
1	cellular organisms	Bacteria	unclassified Bacteria	unclassified Bacteria (miscellaneous)	bacterium HR13
1	cellular organisms	Bacteria	unclassified Bacteria	unclassified Bacteria (miscellaneous)	bacterium F083
1	cellular organisms	Bacteria	unclassified Bacteria	unclassified Bacteria (miscellaneous)	bacterium TMED274
1	cellular organisms	Bacteria	unclassified Bacteria	unclassified Bacteria (miscellaneous)	bacterium (Candidatus Gribaldobacteria) CG10_big_fil_rev_8_21_14_0_10_41_12
2	cellular organisms	Bacteria	unclassified Bacteria	unclassified Bacteria (miscellaneous)	bacterium AMD01
24	cellular organisms	Bacteria	unclassified Bacteria	unclassified Bacteria (miscellaneous)	bacterium HR26
10	cellular organisms	Bacteria	unclassified Bacteria	unclassified Bacteria (miscellaneous)	bacterium TMED181
1	cellular organisms	Bacteria	unclassified Bacteria	unclassified Bacteria (miscellaneous)	bacterium ADurb.Bin243
1	cellular organisms	Bacteria	unclassified Bacteria	unclassified Bacteria (miscellaneous)	bacterium (Candidatus Ratteibacteria) CG01_land_8_20_14_3_00_40_19
17	cellular organisms	Bacteria	unclassified Bacteria	unclassified Bacteria (miscellaneous)	bacterium SGD-2
3	cellular organisms	Bacteria	unclassified Bacteria	unclassified Bacteria (miscellaneous)	bacterium HR27
8	cellular organisms	Bacteria	unclassified Bacteria	unclassified Bacteria (miscellaneous)	bacterium HR25
6	cellular organisms	Bacteria	unclassified Bacteria	unclassified Bacteria (miscellaneous)	bacterium HR37
44	cellular organisms	Bacteria	unclassified Bacteria	unclassified Bacteria (miscellaneous)	bacterium HR41
2	cellular organisms	Bacteria	unclassified Bacteria	unclassified Bacteria (miscellaneous)	bacterium M00.F.Ca.ET.230.01.1.1
57	cellular organisms	Bacteria	unclassified Bacteria	unclassified Bacteria (miscellaneous)	bacterium TMED88
12	cellular organisms	Bacteria	unclassified Bacteria	unclassified Bacteria (miscellaneous)	bacterium ADurb.Bin429
14	cellular organisms	Bacteria	unclassified Bacteria	unclassified Bacteria (miscellaneous)	bacterium HR28
9	cellular organisms	Bacteria	unclassified Bacteria	unclassified Bacteria (miscellaneous)	bacterium TMED15
6	cellular organisms	Bacteria	unclassified Bacteria	unclassified Bacteria (miscellaneous)	bacterium (candidate division B38) B3_B38
5	cellular organisms	Bacteria	unclassified Bacteria	unclassified Bacteria (miscellaneous)	bacterium G20
23	cellular organisms	Bacteria	unclassified Bacteria	unclassified Bacteria (miscellaneous)	bacterium HR36
28	cellular organisms	Bacteria	unclassified Bacteria	unclassified Bacteria (miscellaneous)	bacterium HR29
1	cellular organisms	Bacteria	unclassified Bacteria	unclassified Bacteria (miscellaneous)	bacterium 1xD42-87
17	cellular organisms	Bacteria	unclassified Bacteria	unclassified Bacteria (miscellaneous)	bacterium JGI 053
5	cellular organisms	Bacteria	unclassified Bacteria	unclassified Bacteria (miscellaneous)	bacterium BMS3Bbin04
15	cellular organisms	Bacteria	unclassified Bacteria	unclassified Bacteria (miscellaneous)	bacterium HR10
1	cellular organisms	Bacteria	unclassified Bacteria	unclassified Bacteria (miscellaneous)	bacterium TMED221
4	cellular organisms	Bacteria	unclassified Bacteria	unclassified Bacteria (miscellaneous)	bacterium P201
47	cellular organisms	Bacteria	unclassified Bacteria	unclassified Bacteria (miscellaneous)	bacterium BMS3Bbin10
14	cellular organisms	Bacteria	unclassified Bacteria	unclassified Bacteria (miscellaneous)	bacterium HR11
34	cellular organisms	Bacteria	unclassified Bacteria	unclassified Bacteria (miscellaneous)	bacterium HR12
14	cellular organisms	Bacteria	unclassified Bacteria	unclassified Bacteria (miscellaneous)	bacterium JKG1
4	cellular organisms	Bacteria	unclassified Bacteria	unclassified Bacteria (miscellaneous)	bacterium ADurb.Bin363
3	cellular organisms	Bacteria	unclassified Bacteria	unclassified Bacteria (miscellaneous)	bacterium DOLZORAL124_38_8
1	cellular organisms	Bacteria	unclassified Bacteria	unclassified Bacteria (miscellaneous)	bacterium ADurb.Bin478
2	cellular organisms	Bacteria	unclassified Bacteria	unclassified Bacteria (miscellaneous)	bacterium B17
1	cellular organisms	Bacteria	unclassified Bacteria	unclassified Bacteria (miscellaneous)	bacterium D16-50
5	cellular organisms	Bacteria	unclassified Bacteria	unclassified Bacteria (miscellaneous)	bacterium AMD02
4	cellular organisms	Bacteria	unclassified Bacteria	unclassified Bacteria (miscellaneous)	bacterium SM23_31
1	cellular organisms	Bacteria	unclassified Bacteria	unclassified Bacteria (miscellaneous)	bacterium ADurb.Bin270
11	cellular organisms	Bacteria	unclassified Bacteria	unclassified Bacteria (miscellaneous)	bacterium ADurb.Bin425
4	cellular organisms	Bacteria	unclassified Bacteria	unclassified Bacteria (miscellaneous)	bacterium TMED277
5	cellular organisms	Bacteria	unclassified Bacteria	unclassified Bacteria (miscellaneous)	methanotrophic endosymbiont of Bathymodiolus puteoserpentis (Logatchev)
1	cellular organisms	Bacteria	unclassified Bacteria	unclassified Bacteria (miscellaneous)	bacterium 0.1xD8-82
10	cellular organisms	Bacteria	unclassified Bacteria	unclassified Bacteria (miscellaneous)	bacterium 1XD8-76
4	cellular organisms	Bacteria	unclassified Bacteria	unclassified Bacteria (miscellaneous)	bacterium HR15
1	cellular organisms	Bacteria	unclassified Bacteria	unclassified Bacteria (miscellaneous)	bacterium F082
6	cellular organisms	Bacteria	unclassified Bacteria	unclassified Bacteria (miscellaneous)	bacterium BMS3Abin04
6	cellular organisms	Bacteria	unclassified Bacteria	unclassified Bacteria (miscellaneous)	bacterium BMS3Abin06
110	cellular organisms	Bacteria	unclassified Bacteria	unclassified Bacteria (miscellaneous)
1	cellular organisms	Bacteria	unclassified Bacteria	unclassified Bacteria (miscellaneous)	bacterium TMED198
9	cellular organisms	Bacteria	unclassified Bacteria	unclassified Bacteria (miscellaneous)	bacterium F11
9	cellular organisms	Bacteria	unclassified Bacteria	unclassified Bacteria (miscellaneous)	bacterium HR08
9	cellular organisms	Bacteria	unclassified Bacteria	unclassified Bacteria (miscellaneous)	bacterium BRH_c32
2	cellular organisms	Bacteria	unclassified Bacteria	unclassified Bacteria (miscellaneous)	bacterium E08(2017)
4	cellular organisms	Bacteria	unclassified Bacteria	unclassified Bacteria (miscellaneous)	bacterium CG_4_9_14_3_um_filter_65_15
97	cellular organisms	Bacteria	unclassified Bacteria	unclassified Bacteria (miscellaneous)	bacterium HR30
2	cellular organisms	Bacteria	unclassified Bacteria	unclassified Bacteria (miscellaneous)	bacterium M21
1	cellular organisms	Bacteria	unclassified Bacteria	unclassified Bacteria (miscellaneous)	bacterium 0.1xD8-71
5	cellular organisms	Bacteria	unclassified Bacteria	unclassified Bacteria (miscellaneous)	bacterium CG2_30_54_10
3	cellular organisms	Bacteria	unclassified Bacteria	unclassified Bacteria (miscellaneous)	bacterium BMS3Abin03
4	cellular organisms	Bacteria	unclassified Bacteria	Vampirococcus	unclassified Vampirococcus	Vampirococcus sp. LiM
28	cellular organisms	Bacteria	unclassified Bacteria
1	cellular organisms	Archaea	unclassified Archaea	unclassified Archaea (miscellaneous)	archaeon GW2011_AR13
1	cellular organisms	Archaea	unclassified Archaea	unclassified Archaea (miscellaneous)	archaeon 13_1_20CM_2_54_9
1	cellular organisms	Archaea	unclassified Archaea	unclassified Archaea (miscellaneous)	archaeon GW2011_AR3
2	cellular organisms	Archaea	unclassified Archaea	unclassified Archaea (miscellaneous)
2	cellular organisms	Archaea	unclassified Archaea	unclassified Archaea (miscellaneous)	archaeon GW2011_AR10
1	cellular organisms	Archaea	unclassified Archaea	unclassified Archaea (miscellaneous)	archaeon GW2011_AR5
1	cellular organisms	Archaea	unclassified Archaea	unclassified Archaea (miscellaneous)	archaeon 13_1_20CM_2_51_12
1	cellular organisms	Archaea	unclassified Archaea	unclassified Archaea (miscellaneous)	archaeon MnTg01
21	cellular organisms	Archaea	unclassified Archaea	unclassified Archaea (miscellaneous)	archaeon
1	cellular organisms	Archaea	unclassified Archaea	unclassified Archaea (miscellaneous)	archaeon GW2011_AR4
1	cellular organisms	Archaea	unclassified Archaea	unclassified Archaea (miscellaneous)	archaeon GW2011_AR11
1	cellular organisms	Archaea	unclassified Archaea	unclassified Archaea (miscellaneous)	archaeon ADurb.Bin336
1	cellular organisms	Archaea	unclassified Archaea	unclassified Archaea (miscellaneous)	archaeon BMS3Bbin15
2	cellular organisms	Archaea	unclassified Archaea	unclassified Archaea (miscellaneous)	archaeon HR02
1	cellular organisms	Archaea	unclassified Archaea	unclassified Archaea (miscellaneous)	archaeon RBG_16_50_20
1	cellular organisms	Archaea	unclassified Archaea	unclassified Archaea (miscellaneous)	archaeon HR01
13147	cellular organisms	Bacteria	unclassified
18	cellular organisms	Archaea	unclassified
1	cellular organisms	Bacteria	Thermotogae	Thermotogae	Thermotogales	Thermotogaceae	Pseudothermotoga	Pseudothermotoga hypogea
2	cellular organisms	Bacteria	Thermotogae	Thermotogae	Kosmotogales	Kosmotogaceae	Mesotoga	unclassified Mesotoga
1	cellular organisms	Bacteria	Thermotogae	Thermotogae	Thermotogales	unclassified Thermotogales	unclassified Thermotogales (miscellaneous)	Thermotogales bacterium 46_20
1	cellular organisms	Bacteria	Thermotogae	Thermotogae	Thermotogales	Fervidobacteriaceae	Fervidobacterium	Fervidobacterium gondwanense
1	cellular organisms	Bacteria	Thermotogae	Thermotogae	Petrotogales	Petrotogaceae	Petrotoga	Petrotoga mobilis
2	cellular organisms	Bacteria	Thermotogae	Thermotogae	Kosmotogales	Kosmotogaceae	Kosmotoga	Kosmotoga arenicorallina
6	cellular organisms	Bacteria	Thermotogae	Thermotogae	Petrotogales	Petrotogaceae	Petrotoga
1	cellular organisms	Bacteria	Thermotogae	Thermotogae	Petrotogales	Petrotogaceae	Petrotoga	unclassified Petrotoga
3	cellular organisms	Bacteria	Thermotogae	Thermotogae	Kosmotogales	Kosmotogaceae	Kosmotoga	unclassified Kosmotoga	Kosmotoga sp.
2	cellular organisms	Bacteria	Thermotogae	Thermotogae	Thermotogales	Thermotogaceae	Pseudothermotoga	Pseudothermotoga thermarum
1	cellular organisms	Bacteria	Thermotogae	Thermotogae	Thermotogales	Fervidobacteriaceae	Thermosipho
2	cellular organisms	Bacteria	Thermotogae	Thermotogae	Thermotogales	Fervidobacteriaceae	Fervidobacterium	Fervidobacterium thailandense
1	cellular organisms	Bacteria	Thermotogae	Thermotogae	Petrotogales	Petrotogaceae	Marinitoga	Marinitoga lauensis
4	cellular organisms	Bacteria	Thermotogae	Thermotogae	Thermotogales	Thermotogaceae	Thermotoga	unclassified Thermotoga	Thermotoga sp. TBYP3.1.4.1
1	cellular organisms	Bacteria	Thermotogae	Thermotogae	Thermotogales	Thermotogaceae	Thermotoga	unclassified Thermotoga	Thermotoga sp. KOL6
1	cellular organisms	Bacteria	Thermotogae	Thermotogae	Thermotogales	Fervidobacteriaceae	Fervidobacterium
2	cellular organisms	Bacteria	Thermotogae	Thermotogae	Thermotogales	Fervidobacteriaceae	Fervidobacterium	Fervidobacterium pennivorans
1	cellular organisms	Bacteria	Thermotogae	Thermotogae	Thermotogales
1	cellular organisms	Bacteria	Thermotogae	Thermotogae	Mesoaciditogales	Mesoaciditogaceae	Mesoaciditoga	Mesoaciditoga lauensis
5	cellular organisms	Bacteria	Thermotogae	Thermotogae	Kosmotogales	Kosmotogaceae	Mesotoga
1	cellular organisms	Bacteria	Thermotogae	Thermotogae	Thermotogales	Fervidobacteriaceae	Thermosipho	Thermosipho atlanticus
2	cellular organisms	Bacteria	Thermotogae	Thermotogae	Thermotogales	Thermotogaceae	Thermotoga	unclassified Thermotoga	Thermotoga sp.
3	cellular organisms	Bacteria	Thermotogae	Thermotogae	Thermotogales	Thermotogaceae
3	cellular organisms	Bacteria	Thermotogae	Thermotogae	Kosmotogales	Kosmotogaceae	Mesotoga	Mesotoga infera
2	cellular organisms	Bacteria	Thermotogae	Thermotogae	Petrotogales	Petrotogaceae	Defluviitoga	Defluviitoga tunisiensis
1	cellular organisms	Bacteria	Thermotogae	Thermotogae	Thermotogales	Thermotogaceae	Thermotoga	unclassified Thermotoga	Thermotoga sp. Ku-13t
1	cellular organisms	Bacteria	Thermotogae	Thermotogae	Petrotogales	Petrotogaceae	Marinitoga	unclassified Marinitoga	Marinitoga sp. 1155
2	cellular organisms	Bacteria	Thermotogae	Thermotogae	Petrotogales	Petrotogaceae	Marinitoga
2	cellular organisms	Bacteria	Thermotogae	Thermotogae	Kosmotogales	Kosmotogaceae	Kosmotoga	Kosmotoga pacifica
1	cellular organisms	Bacteria	Thermotogae	Thermotogae	Thermotogales	Fervidobacteriaceae	Thermosipho	Thermosipho melanesiensis
1	cellular organisms	Bacteria	Thermotogae	Thermotogae	Petrotogales	Petrotogaceae	Marinitoga	unclassified Marinitoga	Marinitoga sp. 1137
1	cellular organisms	Bacteria	Thermotogae	unclassified Thermotogae	Thermotogae bacterium ADurb.Bin062
3	cellular organisms	Bacteria	Thermotogae	unclassified Thermotogae	Thermotogae bacterium
6	cellular organisms	Bacteria	Thermotogae
4	cellular organisms	Bacteria	Thermodesulfobacteria	Thermodesulfobacteria	Thermodesulfobacteriales	Thermodesulfobacteriaceae	Thermodesulfatator	unclassified Thermodesulfatator	Thermodesulfatator sp.
5	cellular organisms	Bacteria	Thermodesulfobacteria	Thermodesulfobacteria	Thermodesulfobacteriales	Thermodesulfobacteriaceae	Thermodesulfatator	Thermodesulfatator atlanticus
1	cellular organisms	Bacteria	Thermodesulfobacteria	Thermodesulfobacteria	Thermodesulfobacteriales	Thermodesulfobacteriaceae	Thermodesulfobacterium
3	cellular organisms	Bacteria	Thermodesulfobacteria	Thermodesulfobacteria	Thermodesulfobacteriales	Thermodesulfobacteriaceae	Thermodesulfobacterium	Thermodesulfobacterium geofontis
5	cellular organisms	Bacteria	Thermodesulfobacteria	Thermodesulfobacteria	Thermodesulfobacteriales	Thermodesulfobacteriaceae	Thermosulfuriphilus	Thermosulfuriphilus ammonigenes
1	cellular organisms	Bacteria	Thermodesulfobacteria	Thermodesulfobacteria	Thermodesulfobacteriales	Thermodesulfobacteriaceae	Thermodesulfobacterium	unclassified Thermodesulfobacterium	Thermodesulfobacterium sp. TA1
3	cellular organisms	Bacteria	Thermodesulfobacteria	Thermodesulfobacteria	Thermodesulfobacteriales	Thermodesulfobacteriaceae	Caldimicrobium	Caldimicrobium thiodismutans
4	cellular organisms	Bacteria	Thermodesulfobacteria	Thermodesulfobacteria	Thermodesulfobacteriales	Thermodesulfobacteriaceae	Thermosulfurimonas	Thermosulfurimonas dismutans
2	cellular organisms	Bacteria	Thermodesulfobacteria	Thermodesulfobacteria	Thermodesulfobacteriales	Thermodesulfobacteriaceae	Thermodesulfatator	Thermodesulfatator indicus
3	cellular organisms	Bacteria	Thermodesulfobacteria	Thermodesulfobacteria	Thermodesulfobacteriales	Thermodesulfobacteriaceae	Thermodesulfatator	Thermodesulfatator autotrophicus
1	cellular organisms	Bacteria	Thermodesulfobacteria	Thermodesulfobacteria	Thermodesulfobacteriales	Thermodesulfobacteriaceae	Thermosulfurimonas	Thermosulfurimonas marina
2	cellular organisms	Bacteria	Thermodesulfobacteria	Thermodesulfobacteria	Thermodesulfobacteriales	Thermodesulfobacteriaceae	Thermodesulfatator
2	cellular organisms	Bacteria	Thermodesulfobacteria	Thermodesulfobacteria	Thermodesulfobacteriales	unclassified Thermodesulfobacteriales	Thermodesulfobacteriales bacterium
2	cellular organisms	Bacteria	Thermodesulfobacteria	unclassified Thermodesulfobacteria	Thermodesulfobacteria bacterium
2	cellular organisms	Bacteria	Tenericutes	Candidatus Izimaplasma	unclassified Candidatus Izimaplasma	Candidatus Izimaplasma sp. HR2
1	cellular organisms	Bacteria	Tenericutes	Candidatus Izimaplasma	unclassified Candidatus Izimaplasma	Candidatus Izimaplasma sp. HR1
1	cellular organisms	Bacteria	Tenericutes	Mollicutes	Mycoplasmatales	Mycoplasmataceae	Mycoplasma	Mycoplasma penetrans
1	cellular organisms	Bacteria	Tenericutes	Mollicutes	Mycoplasmatales	Mycoplasmataceae	Mycoplasma	Mycoplasma citelli
1	cellular organisms	Bacteria	Tenericutes	Mollicutes	Mycoplasmatales	Mycoplasmataceae	Mycoplasma	environmental samples	Mycoplasma sp. CAG:611
1	cellular organisms	Bacteria	Tenericutes	Mollicutes	Acholeplasmatales	unclassified Acholeplasmatales	Acholeplasmatales bacterium
4	cellular organisms	Bacteria	Tenericutes	Mollicutes	Mycoplasmatales	Mycoplasmataceae	Candidatus Hepatoplasma	Candidatus Hepatoplasma crinochetorum
1	cellular organisms	Bacteria	Tenericutes	Mollicutes	Mycoplasmatales	Mycoplasmataceae	Mycoplasma	unclassified Mycoplasma	Mycoplasma sp.
2	cellular organisms	Bacteria	Tenericutes	Mollicutes	Entomoplasmatales
1	cellular organisms	Bacteria	Tenericutes	Mollicutes	Acholeplasmatales	Acholeplasmataceae	Candidatus Phytoplasma	Candidatus Phytoplasma asteris	Paulownia witches'-broom phytoplasma
2	cellular organisms	Bacteria	Tenericutes	Mollicutes	Mycoplasmatales	Mycoplasmataceae	Mycoplasma	Mycoplasma gallisepticum
1	cellular organisms	Bacteria	Tenericutes	Mollicutes	Mycoplasmatales	Mycoplasmataceae	Mycoplasma	Mycoplasma mycoides group	Mycoplasma feriruminatoris
1	cellular organisms	Bacteria	Tenericutes	Mollicutes	Acholeplasmatales	Acholeplasmataceae	Candidatus Phytoplasma	16SrXII (Stolbur group)	Candidatus Phytoplasma australiense
1	cellular organisms	Bacteria	Tenericutes	Mollicutes	Entomoplasmatales	Spiroplasmataceae	Spiroplasma	Spiroplasma cantharicola
1	cellular organisms	Bacteria	Tenericutes	Mollicutes	Mycoplasmatales	Mycoplasmataceae	Mycoplasma	Mycoplasma columbinasale
1	cellular organisms	Bacteria	Tenericutes	Mollicutes	Acholeplasmatales	Acholeplasmataceae	Acholeplasma	Acholeplasma brassicae
1	cellular organisms	Bacteria	Tenericutes	Mollicutes	Mycoplasmatales	Mycoplasmataceae	Mycoplasma	Mycoplasma hyopneumoniae
1	cellular organisms	Bacteria	Tenericutes	Mollicutes	Mycoplasmatales	Mycoplasmataceae	Mycoplasma	Mycoplasma pirum
1	cellular organisms	Bacteria	Tenericutes	Mollicutes
1	cellular organisms	Bacteria	Tenericutes	Mollicutes	Mycoplasmatales	unclassified Mycoplasmatales	endosymbiont DhMRE of Dentiscutata heterogama
2	cellular organisms	Bacteria	Tenericutes	Mollicutes	Mycoplasmatales	Mycoplasmataceae	unclassified Mycoplasmataceae	Mycoplasmataceae bacterium CE_OT135
2	cellular organisms	Bacteria	Tenericutes	Mollicutes	Mycoplasmatales
1	cellular organisms	Bacteria	Tenericutes	Mollicutes	Entomoplasmatales	Spiroplasmataceae	Spiroplasma	Spiroplasma poulsonii
1	cellular organisms	Bacteria	Tenericutes	Mollicutes	Entomoplasmatales	Spiroplasmataceae	Spiroplasma	unclassified Spiroplasma	Spiroplasma sp. TIUS-1
1	cellular organisms	Bacteria	Tenericutes	Mollicutes	Mycoplasmatales	Mycoplasmataceae	Mycoplasma	Mycoplasma fermentans	Mycoplasma fermentans PG18
1	cellular organisms	Bacteria	Tenericutes	Mollicutes	Mycoplasmatales	Mycoplasmataceae	Mycoplasma	Mycoplasma synoviae
1	cellular organisms	Bacteria	Tenericutes	Mollicutes	Entomoplasmatales	Entomoplasmataceae	Entomoplasma	Entomoplasma ellychniae
1	cellular organisms	Bacteria	Tenericutes	Mollicutes	Mycoplasmatales	Mycoplasmataceae	Mycoplasma	Mycoplasma pulmonis
1	cellular organisms	Bacteria	Tenericutes	Mollicutes	Acholeplasmatales	Acholeplasmataceae	unclassified Acholeplasmataceae	Acholeplasmataceae bacterium
3	cellular organisms	Bacteria	Tenericutes	Mollicutes	Mycoplasmatales	Mycoplasmataceae	Mycoplasma	Mycoplasma todarodis
2	cellular organisms	Bacteria	Tenericutes	Mollicutes	Entomoplasmatales	Spiroplasmataceae	Spiroplasma
1	cellular organisms	Bacteria	Tenericutes	Mollicutes	Mycoplasmatales	Mycoplasmataceae	Mycoplasma	Mycoplasma anserisalpingitidis
2	cellular organisms	Bacteria	Tenericutes	Mollicutes	Mycoplasmatales	Mycoplasmataceae	unclassified Mycoplasmataceae	Mycoplasmataceae bacterium RC_NB112A
1	cellular organisms	Bacteria	Tenericutes	Mollicutes	Entomoplasmatales	Spiroplasmataceae	Spiroplasma	Spiroplasma culicicola
1	cellular organisms	Bacteria	Tenericutes	Mollicutes	Entomoplasmatales	Spiroplasmataceae	Spiroplasma	Spiroplasma chinense
1	cellular organisms	Bacteria	Tenericutes	Mollicutes	Mycoplasmatales	Mycoplasmataceae	Mycoplasma	Mycoplasma testudinis
5	cellular organisms	Bacteria	Tenericutes	Mollicutes	Entomoplasmatales	Entomoplasmataceae	Entomoplasma	Entomoplasma luminosum
2	cellular organisms	Bacteria	Tenericutes	Mollicutes	Mycoplasmatales	Mycoplasmataceae	Mycoplasma	Mycoplasma bovis
1	cellular organisms	Bacteria	Tenericutes	Mollicutes	Entomoplasmatales	Entomoplasmataceae	Entomoplasma	Entomoplasma melaleucae
3	cellular organisms	Bacteria	Tenericutes	Mollicutes	Mycoplasmatales	unclassified Mycoplasmatales	endosymbiont GvMRE of Glomus versiforme
1	cellular organisms	Bacteria	Tenericutes	Mollicutes	Entomoplasmatales	Spiroplasmataceae	Spiroplasma	Spiroplasma chrysopicola
5	cellular organisms	Bacteria	Tenericutes	Mollicutes	Mycoplasmatales	Mycoplasmataceae	unclassified Mycoplasmataceae	Mycoplasmataceae bacterium RV_VA103A
2	cellular organisms	Bacteria	Tenericutes	Mollicutes	Acholeplasmatales	Acholeplasmataceae	Acholeplasma	unclassified Acholeplasma	Acholeplasma sp.
2	cellular organisms	Bacteria	Tenericutes	Mollicutes	Mycoplasmatales	Mycoplasmataceae	Mycoplasma
2	cellular organisms	Bacteria	Tenericutes	unclassified Tenericutes	Tenericutes bacterium HGW-Tenericutes-2
1	cellular organisms	Bacteria	Tenericutes	unclassified Tenericutes	Tenericutes bacterium ADurb.Bin239
1	cellular organisms	Bacteria	Tenericutes	unclassified Tenericutes	Tenericutes bacterium ADurb.BinA124
1	cellular organisms	Bacteria	Tenericutes	unclassified Tenericutes	Tenericutes bacterium MZ-XQ
1	cellular organisms	Bacteria	Tenericutes	unclassified Tenericutes	Tenericutes bacterium HGW-Tenericutes-6
1	cellular organisms	Bacteria	Tenericutes	unclassified Tenericutes	Tenericutes bacterium
1	cellular organisms	Bacteria	Tenericutes	unclassified Tenericutes	Tenericutes bacterium HGW-Tenericutes-1
1	cellular organisms	Bacteria	Tenericutes	unclassified Tenericutes	Tenericutes bacterium HGW-Tenericutes-8
1	cellular organisms	Bacteria	Tenericutes	unclassified Tenericutes
1	cellular organisms	Bacteria	Tenericutes	unclassified Tenericutes	Tenericutes bacterium HGW-Tenericutes-5
1	cellular organisms	Bacteria	Tenericutes
2	cellular organisms	Archaea	Candidatus Bathyarchaeota	unclassified Candidatus Bathyarchaeota	Candidatus Bathyarchaeota archaeon RBG_13_52_12
1	cellular organisms	Archaea	Candidatus Bathyarchaeota	unclassified Candidatus Bathyarchaeota	Candidatus Bathyarchaeota archaeon ex4484_231
2	cellular organisms	Archaea	Candidatus Bathyarchaeota	unclassified Candidatus Bathyarchaeota	Candidatus Bathyarchaeota archaeon BA1
1	cellular organisms	Archaea	Candidatus Bathyarchaeota	unclassified Candidatus Bathyarchaeota	Candidatus Bathyarchaeota archaeon RBG_13_60_20
4	cellular organisms	Archaea	Candidatus Bathyarchaeota	unclassified Candidatus Bathyarchaeota
1	cellular organisms	Archaea	Candidatus Bathyarchaeota	environmental samples	uncultured miscellaneous Crenarchaeota group
1	cellular organisms	Archaea	Candidatus Bathyarchaeota	unclassified Candidatus Bathyarchaeota	Candidatus Bathyarchaeota archaeon B23
46	cellular organisms	Archaea	Candidatus Bathyarchaeota	unclassified Candidatus Bathyarchaeota	Candidatus Bathyarchaeota archaeon
2	cellular organisms	Archaea	Candidatus Bathyarchaeota	unclassified Candidatus Bathyarchaeota	Candidatus Bathyarchaeota archaeon CG07_land_8_20_14_0_80_47_9
1	cellular organisms	Archaea	Candidatus Bathyarchaeota	MCG-6	miscellaneous Crenarchaeota group-6 archaeon AD8-1
7	cellular organisms	Archaea	Candidatus Korarchaeota	Candidatus Korarchaeota archaeon
1	cellular organisms	Archaea	Candidatus Korarchaeota	Candidatus Korarchaeota archaeon NZ13-K
1	cellular organisms	Archaea	Crenarchaeota	Thermoprotei	Acidilobales	Acidilobaceae	Acidilobus	environmental samples	uncultured Acidilobus sp. MG
1	cellular organisms	Archaea	Crenarchaeota	Thermoprotei	Desulfurococcales	Desulfurococcaceae	Aeropyrum	Aeropyrum pernix
1	cellular organisms	Archaea	Crenarchaeota	Thermoprotei	Thermoproteales	Thermofilaceae	Thermofilum	Thermofilum pendens
1	cellular organisms	Archaea	Crenarchaeota	Thermoprotei	Desulfurococcales	Desulfurococcaceae	Aeropyrum
1	cellular organisms	Archaea	Crenarchaeota	Thermoprotei	Acidilobales	Acidilobaceae	Acidilobus
1	cellular organisms	Archaea	Crenarchaeota	Thermoprotei	Sulfolobales	Sulfolobaceae	Sulfolobus	unclassified Sulfolobus
1	cellular organisms	Archaea	Crenarchaeota	unclassified Crenarchaeota	unclassified Crenarchaeota (miscellaneous)	Crenarchaeota archaeon 13_1_20CM_2_51_8
1	cellular organisms	Archaea	Crenarchaeota	Thermoprotei	Thermoproteales	Thermoproteaceae	Pyrobaculum	Pyrobaculum oguniense	Pyrobaculum oguniense TE7
1	cellular organisms	Archaea	Crenarchaeota	Thermoprotei	Thermoproteales	Thermoproteaceae	Thermoproteus	unclassified Thermoproteus	Thermoproteus sp. AZ2
1	cellular organisms	Archaea	Crenarchaeota	Thermoprotei	Thermoproteales	Thermofilaceae	Thermofilum	Thermofilum adornatum
1	cellular organisms	Archaea	Crenarchaeota	Thermoprotei	Sulfolobales	Sulfolobaceae	Sulfolobus	Sulfolobus acidocaldarius	Sulfolobus acidocaldarius SUSAZ
1	cellular organisms	Archaea	Crenarchaeota	Thermoprotei	Desulfurococcales	Pyrodictiaceae	Pyrodictium	Pyrodictium delaneyi
1	cellular organisms	Archaea	Crenarchaeota	Thermoprotei
2	cellular organisms	Archaea	Crenarchaeota	environmental samples	uncultured crenarchaeote
11	cellular organisms	Archaea	Crenarchaeota	Thermoprotei	unclassified Thermoprotei	Thermoprotei archaeon
2	cellular organisms	Archaea	Crenarchaeota	Thermoprotei	Thermoproteales	Thermoproteaceae	Vulcanisaeta	Vulcanisaeta thermophila
1	cellular organisms	Archaea	Crenarchaeota	Thermoprotei	Thermoproteales	Thermoproteaceae	Pyrobaculum
1	cellular organisms	Archaea	Crenarchaeota	Thermoprotei	Sulfolobales	Sulfolobaceae	Acidianus
1	cellular organisms	Archaea	Crenarchaeota	Thermoprotei	Thermoproteales	Thermoproteaceae	Pyrobaculum	unclassified Pyrobaculum	Pyrobaculum sp. WP30
1	cellular organisms	Archaea	Crenarchaeota	Thermoprotei	Desulfurococcales	Pyrodictiaceae	Hyperthermus	Hyperthermus butylicus	Hyperthermus butylicus DSM 5456
1	cellular organisms	Archaea	Crenarchaeota	Thermoprotei	Desulfurococcales	unclassified Desulfurococcales	unclassified Desulfurococcales (miscellaneous)	Desulfurococcales archaeon ex4484_204
1	cellular organisms	Archaea	Crenarchaeota	Thermoprotei	Desulfurococcales	Desulfurococcaceae	Ignicoccus	Ignicoccus hospitalis
1	cellular organisms	Archaea	Crenarchaeota	environmental samples	uncultured crenarchaeote 57a5
1	cellular organisms	Archaea	Crenarchaeota	Thermoprotei	Sulfolobales	Sulfolobaceae	Sulfodiicoccus	Sulfodiicoccus acidiphilus
1	cellular organisms	Archaea	Crenarchaeota	Thermoprotei	Desulfurococcales	Pyrodictiaceae	Hyperthermus	unclassified Hyperthermus	Hyperthermus sp.
1	cellular organisms	Archaea	Crenarchaeota	Thermoprotei	Desulfurococcales	Desulfurococcaceae	Aeropyrum	Aeropyrum camini
1	cellular organisms	Archaea	Crenarchaeota	Thermoprotei	Desulfurococcales	Desulfurococcaceae	unclassified Desulfurococcaceae
1	cellular organisms	Archaea	Crenarchaeota	Thermoprotei	Desulfurococcales	Desulfurococcaceae	Desulfurococcus	Desulfurococcus mucosus
5	cellular organisms	Archaea	Crenarchaeota	unclassified Crenarchaeota	unclassified Crenarchaeota (miscellaneous)	Crenarchaeota archaeon
1	cellular organisms	Archaea	Thaumarchaeota	environmental samples
1	cellular organisms	Archaea	Thaumarchaeota	Nitrosopumilales	Nitrosopumilaceae	Nitrosarchaeum	Candidatus Nitrosarchaeum limnium
1	cellular organisms	Archaea	Thaumarchaeota	unclassified Thaumarchaeota	Candidatus Nitrosotalea	unclassified Candidatus Nitrosotalea	Candidatus Nitrosotalea sp. TS
2	cellular organisms	Archaea	Thaumarchaeota	unclassified Thaumarchaeota	Candidatus Nitrosotenuis	unclassified Candidatus Nitrosotenuis	Candidatus Nitrosotenuis sp.
1	cellular organisms	Archaea	Thaumarchaeota	Nitrosopumilales	Nitrosopumilaceae	Nitrosopumilus	unclassified Nitrosopumilus	Nitrosopumilus sp. H8
1	cellular organisms	Archaea	Thaumarchaeota	Nitrosopumilales	Nitrosopumilaceae	Nitrosarchaeum	Candidatus Nitrosarchaeum limnium	Candidatus Nitrosarchaeum limnium SFB1
1	cellular organisms	Archaea	Thaumarchaeota	unclassified Thaumarchaeota	unclassified Thaumarchaeota (miscellaneous)	Thaumarchaeota archaeon CSP1-1
1	cellular organisms	Archaea	Thaumarchaeota	Nitrosopumilales	unclassified Nitrosopumilales	Nitrosopumilales archaeon CG_4_9_14_0_2_um_filter_34_16
1	cellular organisms	Archaea	Thaumarchaeota	Nitrososphaeria	Candidatus Nitrosocaldales	Candidatus Nitrosocaldaceae	Candidatus Nitrosocaldus
4	cellular organisms	Archaea	Thaumarchaeota	Nitrosopumilales	Nitrosopumilaceae	Nitrosopumilus	unclassified Nitrosopumilus	Nitrosopumilus sp.
1	cellular organisms	Archaea	Thaumarchaeota	Nitrososphaeria	Nitrososphaerales	Nitrososphaeraceae	Nitrososphaera
1	cellular organisms	Archaea	Thaumarchaeota	environmental samples	uncultured marine thaumarchaeote KM3_70_D04
1	cellular organisms	Archaea	Thaumarchaeota	Nitrosopumilales	unclassified Nitrosopumilales	Nitrosopumilales archaeon CG_4_10_14_0_8_um_filter_34_8
47	cellular organisms	Archaea	Thaumarchaeota	unclassified Thaumarchaeota	unclassified Thaumarchaeota (miscellaneous)	Thaumarchaeota archaeon
42	cellular organisms	Archaea	Thaumarchaeota	Nitrosopumilales	unclassified Nitrosopumilales	Nitrosopumilales archaeon
11	cellular organisms	Archaea	Thaumarchaeota	Nitrososphaeria	Nitrososphaerales	Nitrososphaeraceae	Candidatus Nitrosocosmicus	Candidatus Nitrosocosmicus exaquare
2	cellular organisms	Archaea	Thaumarchaeota	Nitrosopumilales	Nitrosopumilaceae	Nitrosopumilus
1	cellular organisms	Archaea	Thaumarchaeota	Nitrosopumilales	Nitrosopumilaceae	Candidatus Nitrosomarinus	Candidatus Nitrosomarinus catalina
1	cellular organisms	Archaea	Thaumarchaeota	Nitrosopumilales	unclassified Nitrosopumilales
11	cellular organisms	Archaea	Thaumarchaeota	Nitrososphaeria	Nitrososphaerales	Nitrososphaeraceae	Nitrososphaera	Candidatus Nitrososphaera gargensis
3	cellular organisms	Archaea	Thaumarchaeota	Nitrosopumilales	Nitrosopumilaceae	Nitrosarchaeum	Nitrosarchaeum koreense
2	cellular organisms	Archaea	Thaumarchaeota	unclassified Thaumarchaeota	unclassified Thaumarchaeota (miscellaneous)	Thaumarchaeota archaeon SCGC AB-539-E09
2	cellular organisms	Archaea	Thaumarchaeota	Nitrosopumilales	Nitrosopumilaceae
23	cellular organisms	Archaea	Thaumarchaeota	Nitrososphaeria	Nitrososphaerales	Nitrososphaeraceae	Candidatus Nitrosocosmicus
106	cellular organisms	Archaea	Thaumarchaeota	Nitrososphaeria	Nitrososphaerales	Nitrososphaeraceae	Candidatus Nitrosocosmicus	Candidatus Nitrosocosmicus oleophilus
3	cellular organisms	Archaea	Thaumarchaeota	unclassified Thaumarchaeota	Candidatus Nitrosotalea	unclassified Candidatus Nitrosotalea	Candidatus Nitrosotalea sp. FS
68	cellular organisms	Archaea	Thaumarchaeota	Nitrososphaeria	Nitrososphaerales	Nitrososphaeraceae	Candidatus Nitrosocosmicus	Candidatus Nitrosocosmicus arcticus
6	cellular organisms	Archaea	Thaumarchaeota	Nitrososphaeria	Nitrososphaerales	Nitrososphaeraceae	Nitrososphaera	unclassified Nitrososphaera	Nitrososphaera sp. AFS
11	cellular organisms	Archaea	Thaumarchaeota	Nitrososphaeria	Nitrososphaerales	Nitrososphaeraceae	Candidatus Nitrosocosmicus	Candidatus Nitrosocosmicus franklandus
6	cellular organisms	Archaea	Thaumarchaeota	Nitrososphaeria	Nitrososphaerales	Nitrososphaeraceae	Candidatus Nitrosocosmicus	unclassified Candidatus Nitrosocosmicus	Candidatus Nitrosocosmicus sp. SS
1	cellular organisms	Archaea	Thaumarchaeota	environmental samples	uncultured marine thaumarchaeote KM3_68_B04
2	cellular organisms	Archaea	Thaumarchaeota	Nitrosopumilales	unclassified Nitrosopumilales	Nitrosopumilales archaeon CG11_big_fil_rev_8_21_14_0_20_33_24
1	cellular organisms	Archaea	Thaumarchaeota	Nitrosopumilales	Nitrosopumilaceae	Nitrosopumilus	Nitrosopumilus maritimus
3	cellular organisms	Archaea	Thaumarchaeota	unclassified Thaumarchaeota	Candidatus Caldiarchaeum	Candidatus Caldiarchaeum subterraneum
5	cellular organisms	Archaea	Thaumarchaeota	Nitrososphaeria	Nitrososphaerales	Nitrososphaeraceae	Nitrososphaera	Candidatus Nitrososphaera evergladensis
1	cellular organisms	Archaea	Thaumarchaeota	Nitrososphaeria	Nitrososphaerales	Nitrososphaeraceae	Nitrososphaera	Nitrososphaera viennensis
4	cellular organisms	Archaea	Thaumarchaeota	unclassified Thaumarchaeota	unclassified Thaumarchaeota (miscellaneous)
1	cellular organisms	Archaea	Thaumarchaeota	unclassified Thaumarchaeota	Candidatus Nitrosotenuis	Candidatus Nitrosotenuis chungbukensis
13	cellular organisms	Archaea	Thaumarchaeota
1	cellular organisms	Archaea	Thaumarchaeota	Nitrosopumilales	Nitrosopumilaceae	Nitrosopumilus	Candidatus Nitrosopumilus salaria
7	cellular organisms	Archaea
1	cellular organisms	Bacteria	Synergistetes	Synergistia	Synergistales	Synergistaceae	Pyramidobacter	Pyramidobacter piscolens
1	cellular organisms	Bacteria	Synergistetes	Synergistia	Synergistales	Synergistaceae	Jonquetella	Jonquetella anthropi
1	cellular organisms	Bacteria	Synergistetes	Synergistia	Synergistales	Synergistaceae	Thermanaerovibrio	Thermanaerovibrio velox
2	cellular organisms	Bacteria	Synergistetes	Synergistia	Synergistales	Synergistaceae	Thermovirga	Thermovirga lienii
2	cellular organisms	Bacteria	Synergistetes	Synergistia	Synergistales	Synergistaceae	Aminomonas	Aminomonas paucivorans
3	cellular organisms	Bacteria	Synergistetes	Synergistia	Synergistales	Synergistaceae	Dethiosulfovibrio	Dethiosulfovibrio peptidovorans
4	cellular organisms	Bacteria	Synergistetes	Synergistia	Synergistales	Synergistaceae	Cloacibacillus	unclassified Cloacibacillus	Cloacibacillus sp. An23
2	cellular organisms	Bacteria	Synergistetes	Synergistia	Synergistales	unclassified Synergistales	Synergistales bacterium 53_16
3	cellular organisms	Bacteria	Synergistetes	Synergistia	Synergistales	Synergistaceae	Aminiphilus	Aminiphilus circumscriptus
2	cellular organisms	Bacteria	Synergistetes	Synergistia	Synergistales	Synergistaceae	Cloacibacillus	Cloacibacillus porcorum
4	cellular organisms	Bacteria	Synergistetes	Synergistia	Synergistales	Synergistaceae	Aminobacterium	Aminobacterium mobile
2	cellular organisms	Bacteria	Synergistetes	Synergistia	Synergistales	Synergistaceae
1	cellular organisms	Bacteria	Synergistetes	Synergistia	Synergistales	Synergistaceae	Dethiosulfovibrio	Dethiosulfovibrio salsuginis
5	cellular organisms	Bacteria	Synergistetes	Synergistia	Synergistales	unclassified Synergistales	Synergistales bacterium 54_24
3	cellular organisms	Bacteria	Synergistetes	Synergistia	Synergistales	Synergistaceae	Acetomicrobium
3	cellular organisms	Bacteria	Synergistetes	Synergistia	Synergistales	Synergistaceae	Aminivibrio	Aminivibrio pyruvatiphilus
3	cellular organisms	Bacteria	Synergistetes	Synergistia	Synergistales	Synergistaceae	Aminobacterium	Aminobacterium colombiense
4	cellular organisms	Bacteria	Synergistetes	Synergistia	Synergistales	unclassified Synergistales
1	cellular organisms	Bacteria	Synergistetes	Synergistia	Synergistales	Synergistaceae	Thermanaerovibrio	Thermanaerovibrio acidaminovorans
2	cellular organisms	Bacteria	Synergistetes	Synergistia	Synergistales	Synergistaceae	Pyramidobacter	unclassified Pyramidobacter
3	cellular organisms	Bacteria	Synergistetes	Synergistia	Synergistales	Synergistaceae	Fretibacterium	Fretibacterium fastidiosum
1	cellular organisms	Bacteria	Synergistetes	unclassified Synergistetes	Synergistetes bacterium ADurb.BinA166
1	cellular organisms	Bacteria	Synergistetes	unclassified Synergistetes	Synergistetes bacterium ADurb.Bin520
1	cellular organisms	Bacteria	Synergistetes	unclassified Synergistetes	Synergistetes bacterium HGW-Synergistetes-1
2	cellular organisms	Bacteria	Synergistetes	unclassified Synergistetes	Synergistetes bacterium ADurb.Bin155
1	cellular organisms	Bacteria	Synergistetes	unclassified Synergistetes	Synergistetes bacterium HGW-Synergistetes-2
1	cellular organisms	Bacteria	Synergistetes
2	cellular organisms	Bacteria	Spirochaetes	environmental samples	uncultured Spirochaetes bacterium
1	cellular organisms	Bacteria	Spirochaetes	Spirochaetia	Brachyspirales	Brachyspiraceae	Brachyspira	Brachyspira alvinipulli
1	cellular organisms	Bacteria	Spirochaetes	Spirochaetia	Spirochaetales	Borreliaceae
1	cellular organisms	Bacteria	Spirochaetes	Spirochaetia	Leptospirales	Leptospiraceae	Leptospira	Leptospira harrisiae
1	cellular organisms	Bacteria	Spirochaetes	Spirochaetia	Leptospirales	Leptospiraceae	Leptospira	Leptospira biflexa
1	cellular organisms	Bacteria	Spirochaetes	Spirochaetia	Spirochaetales	Spirochaetaceae	Treponema	Treponema bryantii
1	cellular organisms	Bacteria	Spirochaetes	Spirochaetia	Leptospirales	Leptospiraceae	Leptospira	Leptospira mayottensis
1	cellular organisms	Bacteria	Spirochaetes	Spirochaetia	Leptospirales	Leptospiraceae	Leptospira	unclassified Leptospira	Leptospira sp. GIMC2001:Bairam-Ali
1	cellular organisms	Bacteria	Spirochaetes	Spirochaetia	Leptospirales	Leptospiraceae	Leptospira	Leptospira langatensis
2	cellular organisms	Bacteria	Spirochaetes	Spirochaetia	Spirochaetales	Spirochaetaceae	Treponema	unclassified Treponema	Treponema sp.
1	cellular organisms	Bacteria	Spirochaetes	Spirochaetia	Leptospirales	Leptospiraceae	Leptospira	Leptospira fainei
1	cellular organisms	Bacteria	Spirochaetes	Spirochaetia	Spirochaetales	unclassified Spirochaetales	unclassified Spirochaetales (miscellaneous)
1	cellular organisms	Bacteria	Spirochaetes	Spirochaetia	Spirochaetales	Spirochaetaceae	Spirochaeta	Spirochaeta africana
1	cellular organisms	Bacteria	Spirochaetes	Spirochaetia	Spirochaetales	Spirochaetaceae	Sphaerochaeta	Sphaerochaeta dissipatitropha
2	cellular organisms	Bacteria	Spirochaetes	Spirochaetia	Leptospirales	Leptospiraceae	Leptospira	Leptospira ognonensis
1	cellular organisms	Bacteria	Spirochaetes	Spirochaetia	Spirochaetales	Spirochaetaceae	Sphaerochaeta	Sphaerochaeta halotolerans
2	cellular organisms	Bacteria	Spirochaetes	Spirochaetia	Spirochaetales	Borreliaceae	Borrelia	Borrelia miyamotoi
1	cellular organisms	Bacteria	Spirochaetes	Spirochaetia	Spirochaetales	Spirochaetaceae	Treponema	unclassified Treponema	Treponema sp. GWC1_61_84
6	cellular organisms	Bacteria	Spirochaetes	Spirochaetia	Leptospirales	Leptospiraceae	Leptospira	Leptospira perolatii
1	cellular organisms	Bacteria	Spirochaetes	Spirochaetia	Leptospirales	Leptospiraceae	Leptospira	unclassified Leptospira	Leptospira sp. B5-022
1	cellular organisms	Bacteria	Spirochaetes	Spirochaetia	Leptospirales	Leptospiraceae	Leptospira	Leptospira ilyithenensis
1	cellular organisms	Bacteria	Spirochaetes	Spirochaetia	Spirochaetales	Spirochaetaceae	Treponema	Treponema lecithinolyticum	Treponema lecithinolyticum ATCC 700332
1	cellular organisms	Bacteria	Spirochaetes	Spirochaetia	Leptospirales	Leptospiraceae	Leptospira	Leptospira haakeii
2	cellular organisms	Bacteria	Spirochaetes	Spirochaetia	Spirochaetales	unclassified Spirochaetales	unclassified Spirochaetales (miscellaneous)	Olavius algarvensis spirochete endosymbiont
4	cellular organisms	Bacteria	Spirochaetes	Spirochaetia	Spirochaetales	Spirochaetaceae	Treponema	Treponema endosymbiont of Eucomonympha sp.
1	cellular organisms	Bacteria	Spirochaetes	Spirochaetia	Spirochaetales	Spirochaetaceae
5	cellular organisms	Bacteria	Spirochaetes	Spirochaetia	Leptospirales	Leptospiraceae	Leptospira	Leptospira idonii
4	cellular organisms	Bacteria	Spirochaetes	Spirochaetia	Spirochaetales	Spirochaetaceae	Sphaerochaeta	Sphaerochaeta coccoides
1	cellular organisms	Bacteria	Spirochaetes	Spirochaetia	Leptospirales	Leptospiraceae	Leptospira	Leptospira alexanderi
1	cellular organisms	Bacteria	Spirochaetes	Spirochaetia	Spirochaetales	Spirochaetaceae	Spirochaeta	unclassified Spirochaeta	Spirochaeta sp. LUC14_002_19_P3
4	cellular organisms	Bacteria	Spirochaetes	Spirochaetia	Spirochaetales	Spirochaetaceae	Treponema	Treponema caldarium
1	cellular organisms	Bacteria	Spirochaetes	Spirochaetia	Leptospirales	Leptospiraceae	Leptospira	Leptospira weilii
2	cellular organisms	Bacteria	Spirochaetes	Spirochaetia	Leptospirales	Leptospiraceae	Leptospira	Leptospira dzianensis
4	cellular organisms	Bacteria	Spirochaetes	Spirochaetia	Spirochaetales	Spirochaetaceae	Spirochaeta	Spirochaeta lutea
1	cellular organisms	Bacteria	Spirochaetes	Spirochaetia	Spirochaetales	Spirochaetaceae	Treponema	Treponema berlinense
2	cellular organisms	Bacteria	Spirochaetes	Spirochaetia	Spirochaetales	Spirochaetaceae	Treponema	Treponema denticola
1	cellular organisms	Bacteria	Spirochaetes	Spirochaetia	Spirochaetales	Spirochaetaceae	Treponema	Treponema socranskii	Treponema socranskii subsp. paredis	Treponema socranskii subsp. paredis ATCC 35535
1	cellular organisms	Bacteria	Spirochaetes	Spirochaetia	Spirochaetales	Borreliaceae	Borrelia
2	cellular organisms	Bacteria	Spirochaetes	Spirochaetia	Spirochaetales	unclassified Spirochaetales	unclassified Spirochaetales (miscellaneous)	spirochete symbiont of Stewartia floridana
50	cellular organisms	Bacteria	Spirochaetes	Spirochaetia	Spirochaetales	Spirochaetaceae	unclassified Spirochaetaceae	Spirochaetaceae bacterium
2	cellular organisms	Bacteria	Spirochaetes	Spirochaetia	Spirochaetales	Spirochaetaceae	Treponema	Treponema azotonutricium
3	cellular organisms	Bacteria	Spirochaetes	Spirochaetia	Spirochaetales	Spirochaetaceae	Treponema	Treponema pedis
3	cellular organisms	Bacteria	Spirochaetes	Spirochaetia	Leptospirales	Leptospiraceae	Leptospira	Leptospira santarosai
2	cellular organisms	Bacteria	Spirochaetes	Spirochaetia	Spirochaetales	Spirochaetaceae	Treponema	unclassified Treponema	Treponema sp. CETP13
3	cellular organisms	Bacteria	Spirochaetes	Spirochaetia	Spirochaetales	Spirochaetaceae	Treponema	Treponema vincentii
2	cellular organisms	Bacteria	Spirochaetes	Spirochaetia	Leptospirales	Leptospiraceae	Leptospira	Leptospira ryugenii
1	cellular organisms	Bacteria	Spirochaetes	Spirochaetia	Spirochaetales	Spirochaetaceae	Treponema	Treponema saccharophilum
3	cellular organisms	Bacteria	Spirochaetes	Spirochaetia	Spirochaetales	environmental samples	uncultured Spirochaetales bacterium HF0500_06B09
4	cellular organisms	Bacteria	Spirochaetes	Spirochaetia	Spirochaetales	Spirochaetaceae	Oceanispirochaeta	unclassified Oceanispirochaeta	Oceanispirochaeta sp. K2
1	cellular organisms	Bacteria	Spirochaetes	Spirochaetia	Spirochaetales	Spirochaetaceae	Treponema	Treponema pectinovorum
2	cellular organisms	Bacteria	Spirochaetes	Spirochaetia	Brachyspirales	Brachyspiraceae	Brachyspira	Brachyspira aalborgi
1	cellular organisms	Bacteria	Spirochaetes	Spirochaetia	Brevinematales	Brevinemataceae	Brevinema	Brevinema andersonii
1	cellular organisms	Bacteria	Spirochaetes	Spirochaetia	Spirochaetales	Spirochaetaceae	Alkalispirochaeta	Alkalispirochaeta americana
1	cellular organisms	Bacteria	Spirochaetes	Spirochaetia	Leptospirales	Leptospiraceae	Leptonema	Leptonema illini	Leptonema illini DSM 21528
6	cellular organisms	Bacteria	Spirochaetes	Spirochaetia	Spirochaetales	Spirochaetaceae	Marispirochaeta	Marispirochaeta aestuarii
6	cellular organisms	Bacteria	Spirochaetes	Spirochaetia	Spirochaetales	Spirochaetaceae	Treponema
1	cellular organisms	Bacteria	Spirochaetes	Spirochaetia	Spirochaetales	Spirochaetaceae	Alkalispirochaeta	Alkalispirochaeta sphaeroplastigenens
1	cellular organisms	Bacteria	Spirochaetes	Spirochaetia	Leptospirales	Leptospiraceae	Leptospira	Leptospira bouyouniensis
5	cellular organisms	Bacteria	Spirochaetes	Spirochaetia	Leptospirales	Leptospiraceae	Leptospira	Leptospira inadai
1	cellular organisms	Bacteria	Spirochaetes	Spirochaetia	Brachyspirales	Brachyspiraceae	Brachyspira	Brachyspira suanatina
1	cellular organisms	Bacteria	Spirochaetes	Spirochaetia	Leptospirales	Leptospiraceae	Leptospira	Leptospira hartskeerlii
3	cellular organisms	Bacteria	Spirochaetes	Spirochaetia	Spirochaetales	Spirochaetaceae	Alkalispirochaeta
2	cellular organisms	Bacteria	Spirochaetes	Spirochaetia	Brachyspirales	Brachyspiraceae	Brachyspira	Brachyspira pilosicoli
1	cellular organisms	Bacteria	Spirochaetes	Spirochaetia	Leptospirales	Leptospiraceae	Leptospira	Leptospira santarosai	Leptospira santarosai str. HAI1380
7	cellular organisms	Bacteria	Spirochaetes	Spirochaetia	Spirochaetales	Spirochaetaceae	Sphaerochaeta	unclassified Sphaerochaeta	Sphaerochaeta sp.
1	cellular organisms	Bacteria	Spirochaetes	Spirochaetia	Spirochaetales	Spirochaetaceae	Spirochaeta	Spirochaeta thermophila
6	cellular organisms	Bacteria	Spirochaetes	Spirochaetia	Spirochaetales	unclassified Spirochaetales	unclassified Spirochaetales (miscellaneous)	Spirochaetales bacterium
1	cellular organisms	Bacteria	Spirochaetes	Spirochaetia	Spirochaetales	Spirochaetaceae	Alkalispirochaeta	Alkalispirochaeta odontotermitis
1	cellular organisms	Bacteria	Spirochaetes	Spirochaetia	Spirochaetales	Spirochaetaceae	Oceanispirochaeta	unclassified Oceanispirochaeta	Oceanispirochaeta sp. M1
1	cellular organisms	Bacteria	Spirochaetes	Spirochaetia	Leptospirales	Leptospiraceae	Leptospira	Leptospira elllisii
1	cellular organisms	Bacteria	Spirochaetes	Spirochaetia	Leptospirales	Leptospiraceae	Leptospira	Leptospira johnsonii
42	cellular organisms	Bacteria	Spirochaetes	Spirochaetia	Leptospirales	Leptospiraceae	Leptospira
2	cellular organisms	Bacteria	Spirochaetes	Spirochaetia	Leptospirales	Leptospiraceae	Leptospira	Leptospira interrogans
1	cellular organisms	Bacteria	Spirochaetes	Spirochaetia	Spirochaetales	Spirochaetaceae	Spirochaeta	Spirochaeta cellobiosiphila
6	cellular organisms	Bacteria	Spirochaetes	Spirochaetia	Leptospirales	Leptospiraceae	Turneriella	Turneriella parva
7	cellular organisms	Bacteria	Spirochaetes	Spirochaetia	Leptospirales	Leptospiraceae	Leptonema	Leptonema illini
1	cellular organisms	Bacteria	Spirochaetes	Spirochaetia	Leptospirales	Leptospiraceae	Leptospira	Leptospira kmetyi
1	cellular organisms	Bacteria	Spirochaetes	Spirochaetia	Spirochaetales	Spirochaetaceae	Sphaerochaeta	Sphaerochaeta globosa
3	cellular organisms	Bacteria	Spirochaetes	Spirochaetia	Leptospirales	Leptospiraceae	Leptospira	Leptospira stimsonii
2	cellular organisms	Bacteria	Spirochaetes	Spirochaetia	Leptospirales	Leptospiraceae	Leptospira	Leptospira licerasiae
2	cellular organisms	Bacteria	Spirochaetes	Spirochaetia	Spirochaetales	Spirochaetaceae	Treponema	Treponema porcinum
6	cellular organisms	Bacteria	Spirochaetes	Spirochaetia	Spirochaetales	environmental samples	uncultured spirochete
2	cellular organisms	Bacteria	Spirochaetes	Spirochaetia	Leptospirales	Leptospiraceae	Leptospira	Leptospira perdikensis
2	cellular organisms	Bacteria	Spirochaetes	Spirochaetia	Spirochaetales
7	cellular organisms	Bacteria	Spirochaetes	Spirochaetia	Spirochaetales	Spirochaetaceae	Treponema	unclassified Treponema
2	cellular organisms	Bacteria	Spirochaetes	Spirochaetia	Leptospirales	Leptospiraceae	Leptospira	Leptospira fluminis
1	cellular organisms	Bacteria	Spirochaetes	Spirochaetia	Leptospirales	Leptospiraceae	Leptospira	Leptospira yanagawae
2	cellular organisms	Bacteria	Spirochaetes	Spirochaetia	Spirochaetales	Spirochaetaceae	Salinispira	Salinispira pacifica
1	cellular organisms	Bacteria	Spirochaetes	Spirochaetia	Leptospirales	Leptospiraceae	Leptospira	Leptospira semungkisensis
4	cellular organisms	Bacteria	Spirochaetes	Spirochaetia	Spirochaetales	Spirochaetaceae	Treponema	Treponema primitia
2	cellular organisms	Bacteria	Spirochaetes	Spirochaetia	Brachyspirales	Brachyspiraceae	Brachyspira	Brachyspira hampsonii
6	cellular organisms	Bacteria	Spirochaetes	Spirochaetia	Leptospirales	Leptospiraceae	Leptospira	Leptospira wolffii
6	cellular organisms	Bacteria	Spirochaetes	Spirochaetia	Spirochaetales	Spirochaetaceae	Sediminispirochaeta
3	cellular organisms	Bacteria	Spirochaetes	Spirochaetia	Brachyspirales	Brachyspiraceae	Brachyspira	Brachyspira murdochii
1	cellular organisms	Bacteria	Spirochaetes	Spirochaetia
1	cellular organisms	Bacteria	Spirochaetes	Spirochaetia	Spirochaetales	Spirochaetaceae	Spirochaeta	Spirochaeta perfilievii
5	cellular organisms	Bacteria	Spirochaetes	Spirochaetia	Leptospirales	Leptospiraceae	Leptospira	unclassified Leptospira	Leptospira sp.
7	cellular organisms	Bacteria	Spirochaetes	Spirochaetia	Spirochaetales	Spirochaetaceae	Marispirochaeta	Candidatus Marispirochaeta associata
1	cellular organisms	Bacteria	Spirochaetes	Spirochaetia	Leptospirales	Leptospiraceae	Leptospira	Leptospira bandrabouensis
8	cellular organisms	Bacteria	Spirochaetes	Spirochaetia	Brachyspirales	Brachyspiraceae	Brachyspira
3	cellular organisms	Bacteria	Spirochaetes	Spirochaetia	Leptospirales	Leptospiraceae	Leptospira	Leptospira andrefontaineae
1	cellular organisms	Bacteria	Spirochaetes	Spirochaetia	Leptospirales	Leptospiraceae	Leptospira	Leptospira mtsangambouensis
1	cellular organisms	Bacteria	Spirochaetes	Spirochaetia	Spirochaetales	Spirochaetaceae	Alkalispirochaeta	Alkalispirochaeta alkalica
1	cellular organisms	Bacteria	Spirochaetes	Spirochaetia	Leptospirales	Leptospiraceae	Leptospira	Leptospira vanthielii
5	cellular organisms	Bacteria	Spirochaetes	unclassified Spirochaetes	Spirochaetes bacterium RBG_16_49_21
3	cellular organisms	Bacteria	Spirochaetes	unclassified Spirochaetes	Spirochaetes bacterium RBG_13_51_14
2	cellular organisms	Bacteria	Spirochaetes	unclassified Spirochaetes	Spirochaetes bacterium ADurb.BinA120
4	cellular organisms	Bacteria	Spirochaetes	unclassified Spirochaetes	Spirochaetae bacterium HGW-Spirochaetae-9
1	cellular organisms	Bacteria	Spirochaetes	unclassified Spirochaetes	Spirochaetes bacterium GWF1_49_6
2	cellular organisms	Bacteria	Spirochaetes	unclassified Spirochaetes	Spirochaetae bacterium HGW-Spirochaetae-7
6	cellular organisms	Bacteria	Spirochaetes	unclassified Spirochaetes	Spirochaetae bacterium HGW-Spirochaetae-3
4	cellular organisms	Bacteria	Spirochaetes	unclassified Spirochaetes	Spirochaetae bacterium HGW-Spirochaetae-1
69	cellular organisms	Bacteria	Spirochaetes	unclassified Spirochaetes	Spirochaetes bacterium
3	cellular organisms	Bacteria	Spirochaetes	unclassified Spirochaetes	Spirochaetes bacterium RBG_13_68_11
1	cellular organisms	Bacteria	Spirochaetes	unclassified Spirochaetes	Spirochaetae bacterium HGW-Spirochaetae-8
2	cellular organisms	Bacteria	Spirochaetes	unclassified Spirochaetes	Spirochaetes bacterium ADurb.Bin218
2	cellular organisms	Bacteria	Spirochaetes	unclassified Spirochaetes	Spirochaetes bacterium GWB1_66_5
4	cellular organisms	Bacteria	Spirochaetes	unclassified Spirochaetes	Spirochaetes bacterium GWB1_48_6
1	cellular organisms	Bacteria	Spirochaetes	unclassified Spirochaetes	Spirochaetes bacterium GWF1_41_5
5	cellular organisms	Bacteria	Spirochaetes	unclassified Spirochaetes	Spirochaetes bacterium GWB1_59_5
1	cellular organisms	Bacteria	Spirochaetes	unclassified Spirochaetes	Spirochaetes bacterium RIFOXYC1_FULL_54_7
2	cellular organisms	Bacteria	Spirochaetes	unclassified Spirochaetes	Spirochaetes bacterium ADurb.Bin215
3	cellular organisms	Bacteria	Spirochaetes	unclassified Spirochaetes	Spirochaetae bacterium HGW-Spirochaetae-5
13	cellular organisms	Bacteria	Spirochaetes	unclassified Spirochaetes
3	cellular organisms	Bacteria	Spirochaetes	unclassified Spirochaetes	Spirochaetes bacterium DG_61
4	cellular organisms	Bacteria	Spirochaetes	unclassified Spirochaetes	Spirochaetes bacterium RBG_16_67_19
4	cellular organisms	Bacteria	Spirochaetes	unclassified Spirochaetes	Spirochaetes bacterium ADurb.Bin133
1	cellular organisms	Bacteria	Spirochaetes	unclassified Spirochaetes	Spirochaetes bacterium GWB1_36_13
3	cellular organisms	Bacteria	Spirochaetes	unclassified Spirochaetes	Spirochaetes bacterium ADurb.Bin110
7	cellular organisms	Bacteria	Spirochaetes
1	cellular organisms	Bacteria	Proteobacteria	Acidithiobacillia	Acidithiobacillales	Acidithiobacillaceae	Acidithiobacillus	Acidithiobacillus ferridurans
4	cellular organisms	Bacteria	Proteobacteria	Acidithiobacillia	Acidithiobacillales	unclassified Acidithiobacillales	Acidithiobacillales bacterium SM1_46
1	cellular organisms	Bacteria	Proteobacteria	Acidithiobacillia	Acidithiobacillales	Acidithiobacillaceae	Acidithiobacillus	Acidithiobacillus sulfuriphilus
9	cellular organisms	Bacteria	Proteobacteria	Acidithiobacillia	Acidithiobacillales	unclassified Acidithiobacillales	Acidithiobacillales bacterium SM23_46
16	cellular organisms	Bacteria	Proteobacteria	Acidithiobacillia	Acidithiobacillales	Acidithiobacillaceae	Acidithiobacillus
6	cellular organisms	Bacteria	Proteobacteria	Acidithiobacillia	Acidithiobacillales	unclassified Acidithiobacillales
19	cellular organisms	Bacteria	Proteobacteria	Acidithiobacillia	Acidithiobacillales	Thermithiobacillaceae	Thermithiobacillus	Thermithiobacillus tepidarius
5	cellular organisms	Bacteria	Proteobacteria	Acidithiobacillia	Acidithiobacillales	Acidithiobacillaceae	Acidithiobacillus	Acidithiobacillus caldus
3	cellular organisms	Bacteria	Proteobacteria	Acidithiobacillia	Acidithiobacillales	Acidithiobacillaceae	Acidithiobacillus	Acidithiobacillus ferrooxidans
7	cellular organisms	Bacteria	Proteobacteria	Acidithiobacillia	Acidithiobacillales	Acidithiobacillaceae	Acidithiobacillus	unclassified Acidithiobacillus	Acidithiobacillus sp.
4	cellular organisms	Bacteria	Proteobacteria	Acidithiobacillia	Acidithiobacillales	Acidithiobacillaceae	Acidithiobacillus	unclassified Acidithiobacillus	Acidithiobacillus ferrianus
5	cellular organisms	Bacteria	Proteobacteria	Acidithiobacillia	Acidithiobacillales	Acidithiobacillaceae	Acidithiobacillus	Acidithiobacillus ferrivorans
5	cellular organisms	Bacteria	Proteobacteria	Acidithiobacillia	Acidithiobacillales	Acidithiobacillaceae	Acidithiobacillus	Acidithiobacillus thiooxidans
10	cellular organisms	Bacteria	Proteobacteria	Acidithiobacillia	Acidithiobacillales	unclassified Acidithiobacillales	Acidithiobacillales bacterium SG8_45
1	cellular organisms	Bacteria	Proteobacteria	Alphaproteobacteria	Sphingomonadales	Sphingomonadaceae	Sphingomonas	unclassified Sphingomonas	Sphingomonas sp. SKA58
1	cellular organisms	Bacteria	Proteobacteria	Alphaproteobacteria	Rickettsiales	Anaplasmataceae	Wolbachieae	Wolbachia	Wolbachia endosymbiont of Cimex lectularius
1	cellular organisms	Bacteria	Proteobacteria	Alphaproteobacteria	Rhodospirillales	Acetobacteraceae	Acidocella	unclassified Acidocella	Acidocella sp. 35-58-6
1	cellular organisms	Bacteria	Proteobacteria	Alphaproteobacteria	Rhizobiales	Rhizobiaceae	Rhizobium/Agrobacterium group	Rhizobium	Rhizobium ecuadorense
1	cellular organisms	Bacteria	Proteobacteria	Alphaproteobacteria	Rhizobiales	Phyllobacteriaceae	Mesorhizobium	unclassified Mesorhizobium	Mesorhizobium sp. M8A.F.Ca.ET.023.02.2.1
1	cellular organisms	Bacteria	Proteobacteria	Alphaproteobacteria	Sphingomonadales	Sphingomonadaceae	Sphingomonas	unclassified Sphingomonas	Sphingomonas sp. IBVSS1
1	cellular organisms	Bacteria	Proteobacteria	Alphaproteobacteria	Rhodobacterales	Rhodobacteraceae	Roseovarius	Roseovarius nubinhibens	Roseovarius nubinhibens ISM
1	cellular organisms	Bacteria	Proteobacteria	Alphaproteobacteria	Rickettsiales	unclassified Rickettsiales	unclassified Rickettsiales (miscellaneous)	Rickettsiales bacterium TMED289
1	cellular organisms	Bacteria	Proteobacteria	Alphaproteobacteria	Rhodobacterales	unclassified Rhodobacterales	Rhodobacterales bacterium 12-65-15
1	cellular organisms	Bacteria	Proteobacteria	Alphaproteobacteria	Rhizobiales	Phyllobacteriaceae	Mesorhizobium	unclassified Mesorhizobium	Mesorhizobium sp. B2-4-4
1	cellular organisms	Bacteria	Proteobacteria	Alphaproteobacteria	Pelagibacterales	Pelagibacteraceae	unclassified Pelagibacteraceae	Pelagibacteraceae bacterium BACL20 MAG-120920-bin64
2	cellular organisms	Bacteria	Proteobacteria	Alphaproteobacteria	Rhodobacterales	Rhodobacteraceae	Pseudovibrio	unclassified Pseudovibrio	Pseudovibrio sp. Ad46
1	cellular organisms	Bacteria	Proteobacteria	Alphaproteobacteria	Rickettsiales	Anaplasmataceae	Wolbachieae	Wolbachia	Wolbachia endosymbiont of Ctenocephalides felis
2	cellular organisms	Bacteria	Proteobacteria	Alphaproteobacteria	Rhodobacterales	Rhodobacteraceae	Paracoccus	unclassified Paracoccus	Paracoccus sp. SMMA_5_4
1	cellular organisms	Bacteria	Proteobacteria	Alphaproteobacteria	Rhodospirillales	Acetobacteraceae	Komagataeibacter	Komagataeibacter oboediens
1	cellular organisms	Bacteria	Proteobacteria	Alphaproteobacteria	unclassified Alphaproteobacteria	PS1 clade	Candidatus Micropelagos	Candidatus Micropelagos thuwalensis
1	cellular organisms	Bacteria	Proteobacteria	Alphaproteobacteria	Rhodobacterales	Rhodobacteraceae	unclassified Rhodobacteraceae	Rhodobacteraceae bacterium R_SAG5
1	cellular organisms	Bacteria	Proteobacteria	Alphaproteobacteria	Rhizobiales	Phyllobacteriaceae	unclassified Phyllobacteriaceae	Phyllobacteriaceae bacterium Z3-1
1	cellular organisms	Bacteria	Proteobacteria	Alphaproteobacteria	Rhodobacterales	Rhodobacteraceae	Pseudooceanicola	unclassified Pseudooceanicola
1	cellular organisms	Bacteria	Proteobacteria	Alphaproteobacteria	Rhodobacterales	Rhodobacteraceae	Histidinibacterium
1	cellular organisms	Bacteria	Proteobacteria	Alphaproteobacteria	Sphingomonadales	Sphingomonadaceae	Sphingomonas	unclassified Sphingomonas	Sphingomonas sp. ABOLF
1	cellular organisms	Bacteria	Proteobacteria	Alphaproteobacteria	Rhizobiales	Brucellaceae	Ochrobactrum	Ochrobactrum intermedium	Ochrobactrum intermedium 229E
1	cellular organisms	Bacteria	Proteobacteria	Alphaproteobacteria	Rhodobacterales	Rhodobacteraceae	Ruegeria	unclassified Ruegeria	Ruegeria sp. PBVC088
1	cellular organisms	Bacteria	Proteobacteria	Alphaproteobacteria	Rhodobacterales	Rhodobacteraceae	Sulfitobacter	unclassified Sulfitobacter	Sulfitobacter sp. HI0027
1	cellular organisms	Bacteria	Proteobacteria	Alphaproteobacteria	Rhizobiales	Phyllobacteriaceae	Mesorhizobium	unclassified Mesorhizobium	Mesorhizobium sp. LNJC405B00
1	cellular organisms	Bacteria	Proteobacteria	Alphaproteobacteria	Rhizobiales	Rhizobiaceae	Rhizobium/Agrobacterium group	Rhizobium	unclassified Rhizobium	Rhizobium sp. Leaf306
1	cellular organisms	Bacteria	Proteobacteria	Alphaproteobacteria	Sphingomonadales	Sphingomonadaceae	Novosphingobium	Novosphingobium tardaugens	Novosphingobium tardaugens NBRC 16725
1	cellular organisms	Bacteria	Proteobacteria	Alphaproteobacteria	Rhodospirillales	Acetobacteraceae	Komagataeibacter	Komagataeibacter pomaceti
2	cellular organisms	Bacteria	Proteobacteria	Alphaproteobacteria	Rhodospirillales	Rhodospirillaceae	Thalassospira	Thalassospira xianhensis	Thalassospira xianhensis MCCC 1A02616
1	cellular organisms	Bacteria	Proteobacteria	Alphaproteobacteria	Rhodobacterales	Rhodobacteraceae	Paracoccus	unclassified Paracoccus	Paracoccus sp. 32d
1	cellular organisms	Bacteria	Proteobacteria	Alphaproteobacteria	Rhodobacterales	Rhodobacteraceae	Amylibacter
1	cellular organisms	Bacteria	Proteobacteria	Alphaproteobacteria	Rhizobiales	Methylobacteriaceae	Methylobacterium	unclassified Methylobacterium	Methylobacterium sp. WL12
1	cellular organisms	Bacteria	Proteobacteria	Alphaproteobacteria	Rhizobiales	Methylobacteriaceae	Methylobacterium	unclassified Methylobacterium	Methylobacterium sp. ZNC0032
1	cellular organisms	Bacteria	Proteobacteria	Alphaproteobacteria	Rhodospirillales	Acetobacteraceae	Komagataeibacter	Komagataeibacter cocois
1	cellular organisms	Bacteria	Proteobacteria	Alphaproteobacteria	Pelagibacterales	Pelagibacteraceae	unclassified Pelagibacteraceae	Pelagibacteraceae bacterium GOM-A5
1	cellular organisms	Bacteria	Proteobacteria	Alphaproteobacteria	Rhizobiales	Methylobacteriaceae	Methylobacterium	unclassified Methylobacterium	Methylobacterium sp. BK227
1	cellular organisms	Bacteria	Proteobacteria	Alphaproteobacteria	Rhizobiales	Rhizobiaceae	Rhizobium/Agrobacterium group	Rhizobium	unclassified Rhizobium	Rhizobium sp. CCGE531
3	cellular organisms	Bacteria	Proteobacteria	Alphaproteobacteria	Sphingomonadales	Erythrobacteraceae	Erythrobacter	unclassified Erythrobacter	Erythrobacter sp. HL-111
1	cellular organisms	Bacteria	Proteobacteria	Alphaproteobacteria	Rhodobacterales	Rhodobacteraceae	Thalassobacter	Thalassobacter stenotrophicus	Thalassobacter stenotrophicus DSM 16310
1	cellular organisms	Bacteria	Proteobacteria	Alphaproteobacteria	Rhizobiales	Rhizobiaceae	Rhizobium/Agrobacterium group	Rhizobium	unclassified Rhizobium	Rhizobium sp. CF048
1	cellular organisms	Bacteria	Proteobacteria	Alphaproteobacteria	Rhodobacterales	Rhodobacteraceae	Falsirhodobacter
2	cellular organisms	Bacteria	Proteobacteria	Alphaproteobacteria	Rhizobiales	Phyllobacteriaceae	Mesorhizobium	unclassified Mesorhizobium	Mesorhizobium sp. L2C085B000
1	cellular organisms	Bacteria	Proteobacteria	Alphaproteobacteria	Rhodospirillales	Acetobacteraceae	Acetobacter	Acetobacter pomorum	Acetobacter pomorum DM001
1	cellular organisms	Bacteria	Proteobacteria	Alphaproteobacteria	Rhodospirillales	Rhodospirillaceae	Haematospirillum	unclassified Haematospirillum	Haematospirillum sp. 15-248
1	cellular organisms	Bacteria	Proteobacteria	Alphaproteobacteria	Rhizobiales	Methylobacteriaceae	Methylorubrum	Methylorubrum extorquens	Methylorubrum extorquens AM1
1	cellular organisms	Bacteria	Proteobacteria	Alphaproteobacteria	Rhizobiales	Phyllobacteriaceae	Mesorhizobium	unclassified Mesorhizobium	Mesorhizobium sp. WSM3864
1	cellular organisms	Bacteria	Proteobacteria	Alphaproteobacteria	Rhizobiales	Rhodobiaceae	Parvibaculum
1	cellular organisms	Bacteria	Proteobacteria	Alphaproteobacteria	Rhodospirillales	Acetobacteraceae	Acetobacter	Acetobacter papayae
1	cellular organisms	Bacteria	Proteobacteria	Alphaproteobacteria	Rhodospirillales	Acetobacteraceae	Acetobacter	Acetobacter orleanensis	Acetobacter orleanensis JCM 7639
1	cellular organisms	Bacteria	Proteobacteria	Alphaproteobacteria	Rhizobiales	Phyllobacteriaceae	Mesorhizobium	unclassified Mesorhizobium	Mesorhizobium sp. M2E.F.Ca.ET.154.01.1.1
1	cellular organisms	Bacteria	Proteobacteria	Alphaproteobacteria	Rhodospirillales	Acetobacteraceae	Acetobacter	Acetobacter pasteurianus	Acetobacter pasteurianus subsp. pasteurianus	Acetobacter pasteurianus NBRC 3278
1	cellular organisms	Bacteria	Proteobacteria	Alphaproteobacteria	unclassified Alphaproteobacteria	unclassified Alphaproteobacteria (miscellaneous)	alpha proteobacterium LLX12A
1	cellular organisms	Bacteria	Proteobacteria	Alphaproteobacteria	Rhodospirillales	Acetobacteraceae	Acetobacter	Acetobacter senegalensis
1	cellular organisms	Bacteria	Proteobacteria	Alphaproteobacteria	Sphingomonadales	Sphingomonadaceae	Sphingobium	unclassified Sphingobium	Sphingobium sp. SA916
2	cellular organisms	Bacteria	Proteobacteria	Alphaproteobacteria	Caulobacterales	Caulobacteraceae	Brevundimonas	Brevundimonas abyssalis	Brevundimonas abyssalis TAR-001
1	cellular organisms	Bacteria	Proteobacteria	Alphaproteobacteria	Rickettsiales	Rickettsiaceae	Rickettsieae	Rickettsia	unclassified Rickettsia	Rickettsia endosymbiont of Ixodes pacificus
2	cellular organisms	Bacteria	Proteobacteria	Alphaproteobacteria	Rhizobiales	Rhizobiaceae	Shinella	unclassified Shinella	Shinella sp. DD12
1	cellular organisms	Bacteria	Proteobacteria	Alphaproteobacteria	Rhizobiales	Phyllobacteriaceae	Mesorhizobium	unclassified Mesorhizobium	Mesorhizobium sp. B2-1-3
1	cellular organisms	Bacteria	Proteobacteria	Alphaproteobacteria	Rhizobiales	Rhizobiaceae	Rhizobium/Agrobacterium group	Agrobacterium	Agrobacterium arsenijevicii
2	cellular organisms	Bacteria	Proteobacteria	Alphaproteobacteria	Caulobacterales	unclassified Caulobacterales	Caulobacterales bacterium RIFCSPHIGHO2_01_FULL_67_30
1	cellular organisms	Bacteria	Proteobacteria	Alphaproteobacteria	Sphingomonadales	Sphingomonadaceae	Sphingomonas	unclassified Sphingomonas	Sphingomonas sp. 1F27F7B
1	cellular organisms	Bacteria	Proteobacteria	Alphaproteobacteria	Rhodobacterales	Rhodobacteraceae	unclassified Rhodobacteraceae	Rhodobacteraceae bacterium TMED160
1	cellular organisms	Bacteria	Proteobacteria	Alphaproteobacteria	Rhizobiales	Bartonellaceae	Bartonella	Bartonella bovis
1	cellular organisms	Bacteria	Proteobacteria	Alphaproteobacteria	Sphingomonadales	Erythrobacteraceae	Porphyrobacter	Porphyrobacter dokdonensis	Porphyrobacter dokdonensis DSW-74
1	cellular organisms	Bacteria	Proteobacteria	Alphaproteobacteria	Sphingomonadales	Sphingomonadaceae	Sphingomonas	unclassified Sphingomonas	Sphingomonas sp. JUb134
2	cellular organisms	Bacteria	Proteobacteria	Alphaproteobacteria	Pelagibacterales	Pelagibacteraceae	Candidatus Pelagibacter	unclassified Candidatus Pelagibacter	Candidatus Pelagibacter sp. TMED197
1	cellular organisms	Bacteria	Proteobacteria	Alphaproteobacteria	Rhizobiales	Xanthobacteraceae	Azorhizobium	unclassified Azorhizobium
1	cellular organisms	Bacteria	Proteobacteria	Alphaproteobacteria	Rhodospirillales	Acetobacteraceae	Gluconobacter	Gluconobacter sphaericus
2	cellular organisms	Bacteria	Proteobacteria	Alphaproteobacteria	Rhodobacterales	Rhodobacteraceae	Pseudovibrio	unclassified Pseudovibrio	Pseudovibrio sp. Ad13
2	cellular organisms	Bacteria	Proteobacteria	Alphaproteobacteria	Rhodobacterales	Hyphomonadaceae	Hyphomonas	unclassified Hyphomonas	Hyphomonas sp. GM-8P
3	cellular organisms	Bacteria	Proteobacteria	Alphaproteobacteria	Rhizobiales	Phyllobacteriaceae	Mesorhizobium	unclassified Mesorhizobium	Mesorhizobium sp. B3-1-6
1	cellular organisms	Bacteria	Proteobacteria	Alphaproteobacteria	Rhizobiales	Rhizobiaceae	Rhizobium/Agrobacterium group	Rhizobium	unclassified Rhizobium	Rhizobium sp. WW_1
1	cellular organisms	Bacteria	Proteobacteria	Alphaproteobacteria	Rhizobiales	Phyllobacteriaceae	Mesorhizobium	unclassified Mesorhizobium	Mesorhizobium sp. B2-1-8
1	cellular organisms	Bacteria	Proteobacteria	Alphaproteobacteria	Rhizobiales	Methylobacteriaceae	Methylobacterium	unclassified Methylobacterium	Methylobacterium sp. yr596
3	cellular organisms	Bacteria	Proteobacteria	Alphaproteobacteria	Caulobacterales	Caulobacteraceae	Brevundimonas	unclassified Brevundimonas	Brevundimonas sp. 'scallop'
1	cellular organisms	Bacteria	Proteobacteria	Alphaproteobacteria	Rhizobiales	Phyllobacteriaceae	Mesorhizobium	unclassified Mesorhizobium	Mesorhizobium sp. WSM3879
2	cellular organisms	Bacteria	Proteobacteria	Alphaproteobacteria	Rhizobiales	Bradyrhizobiaceae	Bradyrhizobium	unclassified Bradyrhizobium	Bradyrhizobium sp. UFLA03-84
2	cellular organisms	Bacteria	Proteobacteria	Alphaproteobacteria	Rhizobiales	Xanthobacteraceae	Azorhizobium	Azorhizobium caulinodans
3	cellular organisms	Bacteria	Proteobacteria	Alphaproteobacteria	Rhizobiales	Aurantimonadaceae	Fulvimarina
1	cellular organisms	Bacteria	Proteobacteria	Alphaproteobacteria	Rhodospirillales	Acetobacteraceae	Bombella	unclassified Bombella
1	cellular organisms	Bacteria	Proteobacteria	Alphaproteobacteria	Rhizobiales	Rhizobiaceae	Rhizobium/Agrobacterium group	Rhizobium	Rhizobium altiplani
4	cellular organisms	Bacteria	Proteobacteria	Alphaproteobacteria	Rhizobiales	Bradyrhizobiaceae	Bradyrhizobium	unclassified Bradyrhizobium	Bradyrhizobium sp. LVM 105
1	cellular organisms	Bacteria	Proteobacteria	Alphaproteobacteria	Rhizobiales	Brucellaceae	Brucella	Brucella suis
2	cellular organisms	Bacteria	Proteobacteria	Alphaproteobacteria	Rhizobiales	Bradyrhizobiaceae	Bradyrhizobium	Bradyrhizobium viridifuturi
1	cellular organisms	Bacteria	Proteobacteria	Alphaproteobacteria	Rhizobiales	Brucellaceae	Ochrobactrum	unclassified Ochrobactrum	Ochrobactrum sp. LMG 5442
1	cellular organisms	Bacteria	Proteobacteria	Alphaproteobacteria	Holosporales	Holosporaceae	Candidatus Nesciobacter	Candidatus Nesciobacter abundans
1	cellular organisms	Bacteria	Proteobacteria	Alphaproteobacteria	Rhodospirillales	unclassified Rhodospirillales	Enhydrobacter
2	cellular organisms	Bacteria	Proteobacteria	Alphaproteobacteria	Rhodospirillales	Acetobacteraceae	Acidiphilium	unclassified Acidiphilium	Acidiphilium sp. JA12-A1
1	cellular organisms	Bacteria	Proteobacteria	Alphaproteobacteria	Kordiimonadales	unclassified Kordiimonadales	Kordiimonadales bacterium JCM 17844
1	cellular organisms	Bacteria	Proteobacteria	Alphaproteobacteria	Rhizobiales	Rhizobiaceae	Rhizobium/Agrobacterium group	Rhizobium	unclassified Rhizobium	Rhizobium sp. 9140
1	cellular organisms	Bacteria	Proteobacteria	Alphaproteobacteria	unclassified Alphaproteobacteria	unclassified Alphaproteobacteria (miscellaneous)	Alphaproteobacteria bacterium MarineAlpha5_Bin6
1	cellular organisms	Bacteria	Proteobacteria	Alphaproteobacteria	Rhizobiales	Methylobacteriaceae	Methylobacterium	unclassified Methylobacterium	Methylobacterium sp. Leaf113
1	cellular organisms	Bacteria	Proteobacteria	Alphaproteobacteria	Caulobacterales	Caulobacteraceae	Caulobacter	unclassified Caulobacter	Caulobacter sp. HMWF025
1	cellular organisms	Bacteria	Proteobacteria	Alphaproteobacteria	Rhizobiales	Bradyrhizobiaceae	Bradyrhizobium	unclassified Bradyrhizobium	Bradyrhizobium sp. PARBB1
2	cellular organisms	Bacteria	Proteobacteria	Alphaproteobacteria	Sphingomonadales	Sphingomonadaceae	Novosphingobium	unclassified Novosphingobium	Novosphingobium sp. 17-62-19
1	cellular organisms	Bacteria	Proteobacteria	Alphaproteobacteria	Rhizobiales	Brucellaceae	Brucella	Brucella suis	Brucella suis bv. 4	Brucella suis bv. 4 str. 40
1	cellular organisms	Bacteria	Proteobacteria	Alphaproteobacteria	Caulobacterales	Caulobacteraceae	Caulobacter	Caulobacter zeae
2	cellular organisms	Bacteria	Proteobacteria	Alphaproteobacteria	Rhizobiales	Phyllobacteriaceae	Mesorhizobium	unclassified Mesorhizobium	Mesorhizobium sp. M8A.F.Ca.ET.059.01.1.1
1	cellular organisms	Bacteria	Proteobacteria	Alphaproteobacteria	Rhodospirillales	Rhodospirillaceae	Thalassospira	Thalassospira profundimaris	Thalassospira profundimaris WP0211
1	cellular organisms	Bacteria	Proteobacteria	Alphaproteobacteria	Sphingomonadales	Sphingomonadaceae	Sandarakinorhabdus	Sandarakinorhabdus limnophila
1	cellular organisms	Bacteria	Proteobacteria	Alphaproteobacteria	unclassified Alphaproteobacteria	unclassified Alphaproteobacteria (miscellaneous)	Alphaproteobacteria bacterium MarineAlpha6_Bin4
1	cellular organisms	Bacteria	Proteobacteria	Alphaproteobacteria	Rhodobacterales	Rhodobacteraceae	Rhodobacter	Rhodobacter johrii
1	cellular organisms	Bacteria	Proteobacteria	Alphaproteobacteria	Rhizobiales	Phyllobacteriaceae	Mesorhizobium	unclassified Mesorhizobium	Mesorhizobium sp. M2A.F.Ca.ET.039.01.1.1
1	cellular organisms	Bacteria	Proteobacteria	Alphaproteobacteria	Rhizobiales	Phyllobacteriaceae	Mesorhizobium	unclassified Mesorhizobium	Mesorhizobium sp. L2C089B000
1	cellular organisms	Bacteria	Proteobacteria	Alphaproteobacteria	Rickettsiales	unclassified Rickettsiales	unclassified Rickettsiales (miscellaneous)	Rickettsiales bacterium TMED211
1	cellular organisms	Bacteria	Proteobacteria	Alphaproteobacteria	Rhodospirillales	Acetobacteraceae	Acetobacter	Acetobacter lambici
1	cellular organisms	Bacteria	Proteobacteria	Alphaproteobacteria	Rickettsiales	Anaplasmataceae	Ehrlichia	canis group	Ehrlichia minasensis
1	cellular organisms	Bacteria	Proteobacteria	Alphaproteobacteria	Caulobacterales	Caulobacteraceae	Caulobacter	unclassified Caulobacter	Caulobacter sp. CCH5-E12
1	cellular organisms	Bacteria	Proteobacteria	Alphaproteobacteria	Rhizobiales	Phyllobacteriaceae	Mesorhizobium	unclassified Mesorhizobium	Mesorhizobium sp. M6A.T.Ce.TU.002.03.1.1
1	cellular organisms	Bacteria	Proteobacteria	Alphaproteobacteria	Rhizobiales	Phyllobacteriaceae	Mesorhizobium	unclassified Mesorhizobium	Mesorhizobium sp. B2-7-2
1	cellular organisms	Bacteria	Proteobacteria	Alphaproteobacteria	Rhodobacterales	Rhodobacteraceae	Sinirhodobacter
3	cellular organisms	Bacteria	Proteobacteria	Alphaproteobacteria	Pelagibacterales	Pelagibacteraceae	Candidatus Pelagibacter	unclassified Candidatus Pelagibacter	Candidatus Pelagibacter sp. TMED166
2	cellular organisms	Bacteria	Proteobacteria	Alphaproteobacteria	Rhodospirillales	Acetobacteraceae	Acidiphilium	unclassified Acidiphilium	Acidiphilium sp. PM
1	cellular organisms	Bacteria	Proteobacteria	Alphaproteobacteria	Rhodospirillales	Acetobacteraceae	Acetobacter	Acetobacter syzygii
3	cellular organisms	Bacteria	Proteobacteria	Alphaproteobacteria	Rhizobiales	Rhizobiaceae	Rhizobium/Agrobacterium group	Rhizobium	Rhizobium vignae
1	cellular organisms	Bacteria	Proteobacteria	Alphaproteobacteria	Rhizobiales	Phyllobacteriaceae	Mesorhizobium	unclassified Mesorhizobium	Mesorhizobium sp. M7A.F.Ca.US.008.03.1.1
2	cellular organisms	Bacteria	Proteobacteria	Alphaproteobacteria	Sphingomonadales	Sphingomonadaceae	Sphingomonas	Sphingomonas wittichii	Sphingomonas wittichii RW1
1	cellular organisms	Bacteria	Proteobacteria	Alphaproteobacteria	Sphingomonadales	Sphingomonadaceae	Sphingomonas	unclassified Sphingomonas	Sphingomonas sp. Leaf257
2	cellular organisms	Bacteria	Proteobacteria	Alphaproteobacteria	Rhodobacterales	Acuticoccaceae	Acuticoccus
1	cellular organisms	Bacteria	Proteobacteria	Alphaproteobacteria	Rhizobiales	Phyllobacteriaceae	Mesorhizobium	unclassified Mesorhizobium	Mesorhizobium sp. LSJC277A00
1	cellular organisms	Bacteria	Proteobacteria	Alphaproteobacteria	Pelagibacterales	Pelagibacteraceae	Candidatus Pelagibacter	unclassified Candidatus Pelagibacter
1	cellular organisms	Bacteria	Proteobacteria	Alphaproteobacteria	Rhizobiales	Phyllobacteriaceae	Aminobacter	unclassified Aminobacter	Aminobacter sp. J15
1	cellular organisms	Bacteria	Proteobacteria	Alphaproteobacteria	Rhizobiales	Methylobacteriaceae	Methylobacterium	unclassified Methylobacterium	Methylobacterium sp. XJLW
1	cellular organisms	Bacteria	Proteobacteria	Alphaproteobacteria	Rhodospirillales	Acetobacteraceae	Acidiphilium	unclassified Acidiphilium	Acidiphilium sp. 34-64-41
4	cellular organisms	Bacteria	Proteobacteria	Alphaproteobacteria	Rhizobiales	Rhizobiaceae	Rhizobium/Agrobacterium group	Neorhizobium	Neorhizobium tomejilense
2	cellular organisms	Bacteria	Proteobacteria	Alphaproteobacteria	Rhizobiales	Phyllobacteriaceae	Mesorhizobium	unclassified Mesorhizobium	Mesorhizobium sp. WSM4313
1	cellular organisms	Bacteria	Proteobacteria	Alphaproteobacteria	Rhizobiales	Rhizobiaceae	Rhizobium/Agrobacterium group	Agrobacterium	Agrobacterium tumefaciens complex	Agrobacterium fabrum	Agrobacterium fabrum str. J-07
1	cellular organisms	Bacteria	Proteobacteria	Alphaproteobacteria	Rickettsiales	unclassified Rickettsiales	unclassified Rickettsiales (miscellaneous)	Rickettsiales bacterium TMED269
2	cellular organisms	Bacteria	Proteobacteria	Alphaproteobacteria	Rhizobiales	Rhizobiaceae	Rhizobium/Agrobacterium group	Rhizobium	Rhizobium sophoriradicis
1	cellular organisms	Bacteria	Proteobacteria	Alphaproteobacteria	Rhizobiales	Rhizobiaceae	Liberibacter
1	cellular organisms	Bacteria	Proteobacteria	Alphaproteobacteria	Rickettsiales	Candidatus Midichloriaceae	Candidatus Jidaibacter	Candidatus Jidaibacter acanthamoeba
1	cellular organisms	Bacteria	Proteobacteria	Alphaproteobacteria	Rhizobiales	Phyllobacteriaceae	Mesorhizobium	unclassified Mesorhizobium	Mesorhizobium sp. AA23
1	cellular organisms	Bacteria	Proteobacteria	Alphaproteobacteria	Sphingomonadales	Sphingomonadaceae	Citromicrobium	unclassified Citromicrobium	Citromicrobium sp. WPS32
2	cellular organisms	Bacteria	Proteobacteria	Alphaproteobacteria	Caulobacterales	Caulobacteraceae	Brevundimonas	unclassified Brevundimonas	Brevundimonas sp. KM4
3	cellular organisms	Bacteria	Proteobacteria	Alphaproteobacteria	Rhizobiales	Methylobacteriaceae	Methylobacterium	Methylobacterium frigidaeris
2	cellular organisms	Bacteria	Proteobacteria	Alphaproteobacteria	Kordiimonadales	Kordiimonadaceae	Kordiimonas
2	cellular organisms	Bacteria	Proteobacteria	Alphaproteobacteria	Rhizobiales	Phyllobacteriaceae	Mesorhizobium	unclassified Mesorhizobium	Mesorhizobium sp. B4-1-1
3	cellular organisms	Bacteria	Proteobacteria	Alphaproteobacteria	Rhizobiales	Rhizobiaceae	Rhizobium/Agrobacterium group	Agrobacterium	Agrobacterium rosae
1	cellular organisms	Bacteria	Proteobacteria	Alphaproteobacteria	Sphingomonadales	Sphingomonadaceae	Sphingomonas	unclassified Sphingomonas	Sphingomonas sp. Leaf67
2	cellular organisms	Bacteria	Proteobacteria	Alphaproteobacteria	Rhizobiales	unclassified Rhizobiales	Candidatus Tokpelaia	unclassified Candidatus Tokpelaia
2	cellular organisms	Bacteria	Proteobacteria	Alphaproteobacteria	Sphingomonadales	Sphingomonadaceae	Sphingomonas	unclassified Sphingomonas	Sphingomonas sp. IC081
1	cellular organisms	Bacteria	Proteobacteria	Alphaproteobacteria	Rhodospirillales	Acetobacteraceae	Acetobacter	unclassified Acetobacter	Acetobacter sp. KACC 21233
1	cellular organisms	Bacteria	Proteobacteria	Alphaproteobacteria	Rhizobiales	Phyllobacteriaceae	Oricola
2	cellular organisms	Bacteria	Proteobacteria	Alphaproteobacteria	Rhizobiales	Rhizobiaceae	Rhizobium/Agrobacterium group	Rhizobium	Rhizobium rosettiformans
1	cellular organisms	Bacteria	Proteobacteria	Alphaproteobacteria	Caulobacterales	Caulobacteraceae	Brevundimonas	unclassified Brevundimonas	Brevundimonas sp. BAL3
2	cellular organisms	Bacteria	Proteobacteria	Alphaproteobacteria	Rickettsiales	Anaplasmataceae	Candidatus Neoehrlichia	Candidatus Neoehrlichia lotoris
1	cellular organisms	Bacteria	Proteobacteria	Alphaproteobacteria	Pelagibacterales	Pelagibacteraceae	unclassified Pelagibacteraceae	Pelagibacteraceae bacterium TMED124
1	cellular organisms	Bacteria	Proteobacteria	Alphaproteobacteria	Sphingomonadales	Sphingomonadaceae	unclassified Sphingomonadaceae	Agrobacterium luteum
1	cellular organisms	Bacteria	Proteobacteria	Alphaproteobacteria	Rhizobiales	Rhizobiaceae	Shinella	unclassified Shinella	Shinella sp. MEC089
1	cellular organisms	Bacteria	Proteobacteria	Alphaproteobacteria	Rhizobiales	Phyllobacteriaceae	Mesorhizobium	unclassified Mesorhizobium	Mesorhizobium sp. LSHC422A00
1	cellular organisms	Bacteria	Proteobacteria	Alphaproteobacteria	Rhizobiales	Rhizobiaceae	Rhizobium/Agrobacterium group	Rhizobium	unclassified Rhizobium	Rhizobium sp. JKLM19E
1	cellular organisms	Bacteria	Proteobacteria	Alphaproteobacteria	Rhodobacterales	Rhodobacteraceae	Phaeobacter	unclassified Phaeobacter	Phaeobacter sp. JL2872
2	cellular organisms	Bacteria	Proteobacteria	Alphaproteobacteria	Rhodospirillales	Rhodospirillaceae	Thalassospira	Thalassospira tepidiphila
1	cellular organisms	Bacteria	Proteobacteria	Alphaproteobacteria	Rhizobiales	Chelatococcaceae	Chelatococcus	Chelatococcus sambhunathii
2	cellular organisms	Bacteria	Proteobacteria	Alphaproteobacteria	Rhodospirillales	Rhodospirillaceae	Roseospira
1	cellular organisms	Bacteria	Proteobacteria	Alphaproteobacteria	Rhodobacterales	Rhodobacteraceae	Rhodobaca	Rhodobaca bogoriensis	Rhodobaca bogoriensis DSM 18756
1	cellular organisms	Bacteria	Proteobacteria	Alphaproteobacteria	Rhizobiales	Rhizobiaceae	Rhizobium/Agrobacterium group	Rhizobium	environmental samples	uncultured Rhizobium sp.
2	cellular organisms	Bacteria	Proteobacteria	Alphaproteobacteria	Rhizobiales	Rhizobiaceae	Rhizobium/Agrobacterium group	Rhizobium	unclassified Rhizobium	Rhizobium sp. Leaf321
1	cellular organisms	Bacteria	Proteobacteria	Alphaproteobacteria	Sphingomonadales	Sphingomonadaceae	Sphingomonas	Sphingomonas aquatilis	Sphingomonas aquatilis NBRC 16722
1	cellular organisms	Bacteria	Proteobacteria	Alphaproteobacteria	Rhizobiales	Brucellaceae	Pseudochrobactrum	unclassified Pseudochrobactrum	Pseudochrobactrum sp. B5
2	cellular organisms	Bacteria	Proteobacteria	Alphaproteobacteria	Rhizobiales	Methylobacteriaceae	Methylobacterium	unclassified Methylobacterium	Methylobacterium sp. ap11
1	cellular organisms	Bacteria	Proteobacteria	Alphaproteobacteria	Rhizobiales	Rhizobiaceae	Rhizobium/Agrobacterium group	Rhizobium	unclassified Rhizobium	Rhizobium sp. NFR17
1	cellular organisms	Bacteria	Proteobacteria	Alphaproteobacteria	Rhizobiales	Rhizobiaceae	Rhizobium/Agrobacterium group	Rhizobium	unclassified Rhizobium	Rhizobium sp. SEMIA 4032
3	cellular organisms	Bacteria	Proteobacteria	Alphaproteobacteria	Rhizobiales	Phyllobacteriaceae	Mesorhizobium	Mesorhizobium japonicum
1	cellular organisms	Bacteria	Proteobacteria	Alphaproteobacteria	Rhodospirillales	Acetobacteraceae	Roseomonas	Roseomonas cervicalis	Roseomonas cervicalis ATCC 49957
5	cellular organisms	Bacteria	Proteobacteria	Alphaproteobacteria	Rhizobiales	Rhizobiaceae	Rhizobium/Agrobacterium group	Neorhizobium	unclassified Neorhizobium	Neorhizobium sp. NCHU2750
5	cellular organisms	Bacteria	Proteobacteria	Alphaproteobacteria	Rhizobiales	Bradyrhizobiaceae	Bosea	Bosea robiniae
2	cellular organisms	Bacteria	Proteobacteria	Alphaproteobacteria	Rhizobiales	Bradyrhizobiaceae	Tardiphaga	unclassified Tardiphaga	Tardiphaga sp. vice304
2	cellular organisms	Bacteria	Proteobacteria	Alphaproteobacteria	Rhodobacterales	unclassified Rhodobacterales	Rhodobacterales bacterium CG15_BIG_FIL_POST_REV_8_21_14_020_59_13
1	cellular organisms	Bacteria	Proteobacteria	Alphaproteobacteria	Rhizobiales	Rhizobiaceae	Rhizobium/Agrobacterium group	Rhizobium	Rhizobium leguminosarum	Rhizobium leguminosarum bv. viciae
1	cellular organisms	Bacteria	Proteobacteria	Alphaproteobacteria	unclassified Alphaproteobacteria	unclassified Alphaproteobacteria (miscellaneous)	Alphaproteobacteria bacterium RIFCSPLOWO2_01_FULL_45_8
3	cellular organisms	Bacteria	Proteobacteria	Alphaproteobacteria	Sphingomonadales	Sphingomonadaceae	Sphingobium	unclassified Sphingobium	Sphingobium sp. 32-64-5
1	cellular organisms	Bacteria	Proteobacteria	Alphaproteobacteria	Rhodobacterales	Rhodobacteraceae	Litoreibacter	Litoreibacter arenae	Litoreibacter arenae DSM 19593
1	cellular organisms	Bacteria	Proteobacteria	Alphaproteobacteria	Rhodospirillales	Acetobacteraceae	Asaia	Asaia bogorensis
1	cellular organisms	Bacteria	Proteobacteria	Alphaproteobacteria	Caulobacterales	Caulobacteraceae	Caulobacter	unclassified Caulobacter	Caulobacter sp. 35-67-4
1	cellular organisms	Bacteria	Proteobacteria	Alphaproteobacteria	Rhizobiales	Bartonellaceae	Bartonella	Bartonella clarridgeiae
1	cellular organisms	Bacteria	Proteobacteria	Alphaproteobacteria	Rhizobiales	Rhizobiaceae	Rhizobium/Agrobacterium group	Rhizobium	unclassified Rhizobium	Rhizobium sp. AAP116
1	cellular organisms	Bacteria	Proteobacteria	Alphaproteobacteria	Rhizobiales	Phyllobacteriaceae	Mesorhizobium	unclassified Mesorhizobium	Mesorhizobium sp. WSM1293
2	cellular organisms	Bacteria	Proteobacteria	Alphaproteobacteria	Rhodospirillales	Acetobacteraceae	Zavarzinia
2	cellular organisms	Bacteria	Proteobacteria	Alphaproteobacteria	Pelagibacterales	Pelagibacteraceae	unclassified Pelagibacteraceae	Pelagibacteraceae bacterium TMED258
1	cellular organisms	Bacteria	Proteobacteria	Alphaproteobacteria	Rhizobiales	Phyllobacteriaceae	Mesorhizobium	unclassified Mesorhizobium	Mesorhizobium sp. L103C119B0
2	cellular organisms	Bacteria	Proteobacteria	Alphaproteobacteria	Rhizobiales	Phyllobacteriaceae	Mesorhizobium	Mesorhizobium metallidurans	Mesorhizobium metallidurans STM 2683
2	cellular organisms	Bacteria	Proteobacteria	Alphaproteobacteria	Rhodospirillales	Rhodospirillaceae	Thalassospira	unclassified Thalassospira	Thalassospira sp. HF15
4	cellular organisms	Bacteria	Proteobacteria	Alphaproteobacteria	Sphingomonadales	Sphingomonadaceae	Sandarakinorhabdus	Sandarakinorhabdus cyanobacteriorum
1	cellular organisms	Bacteria	Proteobacteria	Alphaproteobacteria	Rhizobiales	Methylobacteriaceae	Methylobacterium	unclassified Methylobacterium	Methylobacterium sp. WL6
1	cellular organisms	Bacteria	Proteobacteria	Alphaproteobacteria	unclassified Alphaproteobacteria	unclassified Alphaproteobacteria (miscellaneous)	alpha proteobacterium NT18-17
1	cellular organisms	Bacteria	Proteobacteria	Alphaproteobacteria	Rhizobiales	Phyllobacteriaceae	Mesorhizobium	unclassified Mesorhizobium	Mesorhizobium sp. M7A.F.Ca.US.001.01.1.1
2	cellular organisms	Bacteria	Proteobacteria	Alphaproteobacteria	Rhodobacterales	Rhodobacteraceae	Mameliella	unclassified Mameliella	Mameliella sp. LZ-28
1	cellular organisms	Bacteria	Proteobacteria	Alphaproteobacteria	Rhizobiales	Bradyrhizobiaceae	Bradyrhizobium	Bradyrhizobium oligotrophicum	Bradyrhizobium oligotrophicum S58
1	cellular organisms	Bacteria	Proteobacteria	Alphaproteobacteria	Rhizobiales	Bradyrhizobiaceae	Bradyrhizobium	unclassified Bradyrhizobium	Bradyrhizobium sp. LmjTA10
1	cellular organisms	Bacteria	Proteobacteria	Alphaproteobacteria	Rhizobiales	Bartonellaceae	Bartonella	Bartonella rattimassiliensis
2	cellular organisms	Bacteria	Proteobacteria	Alphaproteobacteria	environmental samples	uncultured alpha proteobacterium EB080_L43F08
1	cellular organisms	Bacteria	Proteobacteria	Alphaproteobacteria	Pelagibacterales	Pelagibacteraceae	Candidatus Pelagibacter	unclassified Candidatus Pelagibacter	Candidatus Pelagibacter sp. HTCC7211
1	cellular organisms	Bacteria	Proteobacteria	Alphaproteobacteria	Rhodospirillales	Acetobacteraceae	Acetobacter	Acetobacter tropicalis
2	cellular organisms	Bacteria	Proteobacteria	Alphaproteobacteria	Rhizobiales	Rhizobiaceae	Rhizobium/Agrobacterium group	Rhizobium	unclassified Rhizobium	Rhizobium sp. 57MFTsu3.2
1	cellular organisms	Bacteria	Proteobacteria	Alphaproteobacteria	Sphingomonadales	Sphingomonadaceae	Sphingomonas	Sphingomonas haloaromaticamans
1	cellular organisms	Bacteria	Proteobacteria	Alphaproteobacteria	Rhizobiales	Bradyrhizobiaceae	Rhodopseudomonas	Rhodopseudomonas palustris	Rhodopseudomonas palustris HaA2
3	cellular organisms	Bacteria	Proteobacteria	Alphaproteobacteria	Rhizobiales	Phyllobacteriaceae	Mesorhizobium	unclassified Mesorhizobium	Mesorhizobium sp. WSM3859
1	cellular organisms	Bacteria	Proteobacteria	Alphaproteobacteria	Rhodobacterales	Rhodobacteraceae	Loktanella	unclassified Loktanella	Loktanella sp. NP29
3	cellular organisms	Bacteria	Proteobacteria	Alphaproteobacteria	unclassified Alphaproteobacteria	unclassified Alphaproteobacteria (miscellaneous)	Alphaproteobacteria bacterium TMED87
3	cellular organisms	Bacteria	Proteobacteria	Alphaproteobacteria	Sphingomonadales	Sphingomonadaceae	Sphingobium	Sphingobium chungbukense
1	cellular organisms	Bacteria	Proteobacteria	Alphaproteobacteria	unclassified Alphaproteobacteria	unclassified Alphaproteobacteria (miscellaneous)	Alphaproteobacteria bacterium PA1
2	cellular organisms	Bacteria	Proteobacteria	Alphaproteobacteria	Rhodobacterales	Rhodobacteraceae	Roseibacterium	Roseibacterium elongatum	Roseibacterium elongatum DSM 19469
2	cellular organisms	Bacteria	Proteobacteria	Alphaproteobacteria	Sphingomonadales	Sphingomonadaceae	Sphingomonas	unclassified Sphingomonas	Sphingomonas sp. C8-2
2	cellular organisms	Bacteria	Proteobacteria	Alphaproteobacteria	Rickettsiales	Anaplasmataceae	Anaplasma	phagocytophilum group	Anaplasma phagocytophilum
2	cellular organisms	Bacteria	Proteobacteria	Alphaproteobacteria	Rhizobiales	Rhizobiaceae	Sinorhizobium/Ensifer group	Sinorhizobium	unclassified Sinorhizobium	Sinorhizobium sp. NFACC03
2	cellular organisms	Bacteria	Proteobacteria	Alphaproteobacteria	Rhizobiales	Bartonellaceae	Bartonella	Bartonella taylorii
1	cellular organisms	Bacteria	Proteobacteria	Alphaproteobacteria	Rhizobiales	Phyllobacteriaceae	Aquamicrobium
1	cellular organisms	Bacteria	Proteobacteria	Alphaproteobacteria	Rhodospirillales	Acetobacteraceae	Komagataeibacter	Komagataeibacter hansenii
3	cellular organisms	Bacteria	Proteobacteria	Alphaproteobacteria	Rhizobiales	Phyllobacteriaceae	Mesorhizobium	unclassified Mesorhizobium	Mesorhizobium sp. WSM4312
1	cellular organisms	Bacteria	Proteobacteria	Alphaproteobacteria	Rhizobiales	Bradyrhizobiaceae	Bradyrhizobium	unclassified Bradyrhizobium	Bradyrhizobium sp. CCBAU 15544
2	cellular organisms	Bacteria	Proteobacteria	Alphaproteobacteria	Sphingomonadales	Sphingomonadaceae	Sphingomonas	unclassified Sphingomonas	Sphingomonas sp. 28-62-11
1	cellular organisms	Bacteria	Proteobacteria	Alphaproteobacteria	Rhodobacterales	Rhodobacteraceae	Sulfitobacter	Sulfitobacter mediterraneus	Sulfitobacter mediterraneus KCTC 32188
2	cellular organisms	Bacteria	Proteobacteria	Alphaproteobacteria	Rhizobiales	Phyllobacteriaceae	Aquamicrobium	Aquamicrobium defluvii
2	cellular organisms	Bacteria	Proteobacteria	Alphaproteobacteria	Rhodospirillales	unclassified Rhodospirillales	unclassified Rhodospirillales (miscellaneous)	Rhodospirillales bacterium 20-58-10
1	cellular organisms	Bacteria	Proteobacteria	Alphaproteobacteria	Rhodospirillales	Rhodospirillaceae	Thalassospira	unclassified Thalassospira	Thalassospira sp. Nap_22
5	cellular organisms	Bacteria	Proteobacteria	Alphaproteobacteria	Rhizobiales	Phyllobacteriaceae	Mesorhizobium	unclassified Mesorhizobium	Mesorhizobium sp. Root102
3	cellular organisms	Bacteria	Proteobacteria	Alphaproteobacteria	Sphingomonadales	Sphingomonadaceae	Sphingomonas	unclassified Sphingomonas	Sphingomonas sp. 28-62-20
1	cellular organisms	Bacteria	Proteobacteria	Alphaproteobacteria	Rhodospirillales	Acetobacteraceae	Acidiphilium	environmental samples	Acidiphilium sp. CAG:727
1	cellular organisms	Bacteria	Proteobacteria	Alphaproteobacteria	Rhizobiales	Brucellaceae	Ochrobactrum	unclassified Ochrobactrum	Ochrobactrum sp. 3-3
4	cellular organisms	Bacteria	Proteobacteria	Alphaproteobacteria	Rhizobiales	Rhizobiaceae	Rhizobium/Agrobacterium group	Neorhizobium	unclassified Neorhizobium	Neorhizobium sp. JUb45
2	cellular organisms	Bacteria	Proteobacteria	Alphaproteobacteria	Rhodospirillales	unclassified Rhodospirillales	Enhydrobacter	unclassified Enhydrobacter	Enhydrobacter sp. AX1
1	cellular organisms	Bacteria	Proteobacteria	Alphaproteobacteria	Rhizobiales	Methylobacteriaceae	Methylobacterium	unclassified Methylobacterium	Methylobacterium sp. UNC300MFChir4.1
1	cellular organisms	Bacteria	Proteobacteria	Alphaproteobacteria	Rhizobiales	Brucellaceae	Brucella	unclassified Brucella	Brucella sp. 2280
1	cellular organisms	Bacteria	Proteobacteria	Alphaproteobacteria	Rickettsiales	Rickettsiaceae	Rickettsieae	Rickettsia	spotted fever group	Rickettsia sibirica subgroup	Rickettsia sibirica
3	cellular organisms	Bacteria	Proteobacteria	Alphaproteobacteria	Sphingomonadales	Sphingomonadaceae	Sphingobium	unclassified Sphingobium	Sphingobium sp. AR-3-1
1	cellular organisms	Bacteria	Proteobacteria	Alphaproteobacteria	Rhizobiales	Phyllobacteriaceae	Mesorhizobium	unclassified Mesorhizobium	Mesorhizobium sp. B2-3-15
5	cellular organisms	Bacteria	Proteobacteria	Alphaproteobacteria	Rhodobacterales	unclassified Rhodobacterales	Rhodobacterales bacterium 12-64-8
1	cellular organisms	Bacteria	Proteobacteria	Alphaproteobacteria	Rhizobiales	Aurantimonadaceae	Aureimonas	unclassified Aureimonas	Aureimonas sp. AU20
4	cellular organisms	Bacteria	Proteobacteria	Alphaproteobacteria	Rhizobiales	Rhizobiaceae	Rhizobium/Agrobacterium group	Rhizobium	Rhizobium glycinendophyticum
1	cellular organisms	Bacteria	Proteobacteria	Alphaproteobacteria	Rhizobiales	Methylobacteriaceae	Methylobacterium	unclassified Methylobacterium	Methylobacterium sp. WL18
2	cellular organisms	Bacteria	Proteobacteria	Alphaproteobacteria	Rhizobiales	Brucellaceae	Ochrobactrum	Ochrobactrum soli
1	cellular organisms	Bacteria	Proteobacteria	Alphaproteobacteria	Rhodobacterales	Rhodobacteraceae	Roseivivax	Roseivivax isoporae	Roseivivax isoporae LMG 25204
2	cellular organisms	Bacteria	Proteobacteria	Alphaproteobacteria	Rhodobacterales	Rhodobacteraceae	unclassified Rhodobacteraceae	Rhodobacteraceae bacterium HLUCCA09
2	cellular organisms	Bacteria	Proteobacteria	Alphaproteobacteria	Rhizobiales	Methylocystaceae	Methylosinus	unclassified Methylosinus	Methylosinus sp. R-45379
1	cellular organisms	Bacteria	Proteobacteria	Alphaproteobacteria	Rhodobacterales	Rhodobacteraceae	Paracoccus	Paracoccus mutanolyticus
1	cellular organisms	Bacteria	Proteobacteria	Alphaproteobacteria	Rhizobiales	Phyllobacteriaceae	Mesorhizobium	unclassified Mesorhizobium	Mesorhizobium sp. B3-2-1
1	cellular organisms	Bacteria	Proteobacteria	Alphaproteobacteria	Rhizobiales	Phyllobacteriaceae	Mesorhizobium	unclassified Mesorhizobium	Mesorhizobium sp. B2-4-13
1	cellular organisms	Bacteria	Proteobacteria	Alphaproteobacteria	Rhizobiales	Rhizobiaceae	Rhizobium/Agrobacterium group	Rhizobium	unclassified Rhizobium	Rhizobium sp. 15935
2	cellular organisms	Bacteria	Proteobacteria	Alphaproteobacteria	Rhizobiales	Rhizobiaceae	Rhizobium/Agrobacterium group	Rhizobium	unclassified Rhizobium	Rhizobium sp. NIBRBAC000502774
2	cellular organisms	Bacteria	Proteobacteria	Alphaproteobacteria	Rhodospirillales	Acetobacteraceae	Acidocella	unclassified Acidocella	Acidocella sp. 20-57-95
1	cellular organisms	Bacteria	Proteobacteria	Alphaproteobacteria	Rhodobacterales	Rhodobacteraceae	Jannaschia	environmental samples	uncultured Jannaschia sp.
5	cellular organisms	Bacteria	Proteobacteria	Alphaproteobacteria	Rhizobiales	Hyphomicrobiaceae	Devosia	unclassified Devosia	Devosia sp. DBB001
1	cellular organisms	Bacteria	Proteobacteria	Alphaproteobacteria	Pelagibacterales	Pelagibacteraceae	Candidatus Pelagibacter	unclassified Candidatus Pelagibacter	Candidatus Pelagibacter sp. TMED64
2	cellular organisms	Bacteria	Proteobacteria	Alphaproteobacteria	Rhizobiales	Phyllobacteriaceae	Mesorhizobium	unclassified Mesorhizobium	Mesorhizobium sp. M7D.F.Ca.US.005.01.1.1
1	cellular organisms	Bacteria	Proteobacteria	Alphaproteobacteria	Rhizobiales	Rhizobiaceae	Rhizobium/Agrobacterium group	Rhizobium	unclassified Rhizobium	Rhizobium sp. L9
1	cellular organisms	Bacteria	Proteobacteria	Alphaproteobacteria	Rhizobiales	Salinarimonadaceae
2	cellular organisms	Bacteria	Proteobacteria	Alphaproteobacteria	Sphingomonadales	Sphingomonadaceae	Blastomonas	unclassified Blastomonas	Blastomonas sp. CACIA14H2
3	cellular organisms	Bacteria	Proteobacteria	Alphaproteobacteria	Rhodobacterales	unclassified Rhodobacterales	Rhodobacterales bacterium 65-51
4	cellular organisms	Bacteria	Proteobacteria	Alphaproteobacteria	Rhodospirillales	Acetobacteraceae	Komagataeibacter	Komagataeibacter hansenii	Komagataeibacter hansenii JCM 7643
2	cellular organisms	Bacteria	Proteobacteria	Alphaproteobacteria	Rhodospirillales	Acetobacteraceae	Gluconacetobacter	Gluconacetobacter entanii
2	cellular organisms	Bacteria	Proteobacteria	Alphaproteobacteria	Rhizobiales	Phyllobacteriaceae	Mesorhizobium	unclassified Mesorhizobium	Mesorhizobium sp. UASWS1009
2	cellular organisms	Bacteria	Proteobacteria	Alphaproteobacteria	Rhizobiales	Rhizobiaceae	Rhizobium/Agrobacterium group	Rhizobium	unclassified Rhizobium	Rhizobium sp. NFR12
1	cellular organisms	Bacteria	Proteobacteria	Alphaproteobacteria	Rhizobiales	Rhizobiaceae	Rhizobium/Agrobacterium group	Agrobacterium	unclassified Agrobacterium	Agrobacterium sp. RZME10
1	cellular organisms	Bacteria	Proteobacteria	Alphaproteobacteria	Sphingomonadales	Sphingomonadaceae	Sphingomonas	Sphingomonas leidyi
4	cellular organisms	Bacteria	Proteobacteria	Alphaproteobacteria	Rhodobacterales	Rhodobacteraceae	Yoonia	Yoonia vestfoldensis	Yoonia vestfoldensis SKA53
1	cellular organisms	Bacteria	Proteobacteria	Alphaproteobacteria	Rhizobiales	Methylobacteriaceae	Methylobacterium	unclassified Methylobacterium	Methylobacterium sp. WL19
1	cellular organisms	Bacteria	Proteobacteria	Alphaproteobacteria	Sphingomonadales	Sphingomonadaceae	Sphingomonas	Sphingomonas sanxanigenens	Sphingomonas sanxanigenens DSM 19645 = NX02
2	cellular organisms	Bacteria	Proteobacteria	Alphaproteobacteria	Sphingomonadales	Sphingomonadaceae	Sphingomonas	Sphingomonas adhaesiva
1	cellular organisms	Bacteria	Proteobacteria	Alphaproteobacteria	Sphingomonadales	Sphingomonadaceae	Sphingobium	unclassified Sphingobium	Sphingobium sp. PAMC28499
1	cellular organisms	Bacteria	Proteobacteria	Alphaproteobacteria	Magnetococcales	Magnetococcaceae	Magnetococcus	environmental samples	uncultured Magnetococcus sp.
5	cellular organisms	Bacteria	Proteobacteria	Alphaproteobacteria	Rhizobiales	Methylobacteriaceae	Methylobacterium	unclassified Methylobacterium	Methylobacterium sp. 4-46
3	cellular organisms	Bacteria	Proteobacteria	Alphaproteobacteria	Rhizobiales	Beijerinckiaceae	Beijerinckia
1	cellular organisms	Bacteria	Proteobacteria	Alphaproteobacteria	Pelagibacterales	Pelagibacteraceae	unclassified Pelagibacteraceae	Pelagibacteraceae bacterium TMED195
3	cellular organisms	Bacteria	Proteobacteria	Alphaproteobacteria	Rhodobacterales	Rhodobacteraceae	Ruegeria	Ruegeria lacuscaerulensis	Ruegeria lacuscaerulensis ITI-1157
3	cellular organisms	Bacteria	Proteobacteria	Alphaproteobacteria	Rhizobiales	Rhizobiaceae	Rhizobium/Agrobacterium group	Rhizobium	unclassified Rhizobium	Rhizobium sp. MHM7A
5	cellular organisms	Bacteria	Proteobacteria	Alphaproteobacteria	Sphingomonadales	Erythrobacteraceae	Porphyrobacter	Porphyrobacter tepidarius
1	cellular organisms	Bacteria	Proteobacteria	Alphaproteobacteria	Rhizobiales	Bradyrhizobiaceae	Rhodopseudomonas	Rhodopseudomonas palustris	Rhodopseudomonas palustris BisA53
1	cellular organisms	Bacteria	Proteobacteria	Alphaproteobacteria	Rhizobiales	Rhizobiaceae	Rhizobium/Agrobacterium group	Agrobacterium	unclassified Agrobacterium	Agrobacterium sp. 33MFTa1.1
4	cellular organisms	Bacteria	Proteobacteria	Alphaproteobacteria	Rhizobiales	Methylobacteriaceae	Methylobacterium	unclassified Methylobacterium	Methylobacterium sp. 2A
6	cellular organisms	Bacteria	Proteobacteria	Alphaproteobacteria	Rhodobacterales	Rhodobacteraceae	Rhodovulum	Rhodovulum kholense
2	cellular organisms	Bacteria	Proteobacteria	Alphaproteobacteria	Rhodobacterales	Rhodobacteraceae	Palleronia
2	cellular organisms	Bacteria	Proteobacteria	Alphaproteobacteria	Rhizobiales	Rhizobiaceae	Rhizobium/Agrobacterium group	Rhizobium	unclassified Rhizobium	Rhizobium sp. C5
2	cellular organisms	Bacteria	Proteobacteria	Alphaproteobacteria	Rhizobiales	Rhizobiaceae	Rhizobium/Agrobacterium group	Rhizobium	unclassified Rhizobium	Rhizobium sp. C16
1	cellular organisms	Bacteria	Proteobacteria	Alphaproteobacteria	Rhizobiales	Phyllobacteriaceae	Mesorhizobium	unclassified Mesorhizobium	Mesorhizobium sp. M7A.F.Ca.US.010.02.1.1
3	cellular organisms	Bacteria	Proteobacteria	Alphaproteobacteria	Sphingomonadales	Sphingomonadaceae	Sphingomonas	unclassified Sphingomonas	Sphingomonas sp. IBVSS2
1	cellular organisms	Bacteria	Proteobacteria	Alphaproteobacteria	Rhodospirillales	Acetobacteraceae	Roseomonas	Roseomonas mucosa
4	cellular organisms	Bacteria	Proteobacteria	Alphaproteobacteria	Rhodobacterales	Rhodobacteraceae	unclassified Rhodobacteraceae	Rhodobacteraceae bacterium MED-G07
3	cellular organisms	Bacteria	Proteobacteria	Alphaproteobacteria	Rhizobiales	Methylocystaceae	Terasakiella	Terasakiella pusilla
1	cellular organisms	Bacteria	Proteobacteria	Alphaproteobacteria	Rhizobiales	Brucellaceae	Ochrobactrum	unclassified Ochrobactrum	Ochrobactrum sp. EGD-AQ16
1	cellular organisms	Bacteria	Proteobacteria	Alphaproteobacteria	Rhizobiales	Phyllobacteriaceae	Mesorhizobium	unclassified Mesorhizobium	Mesorhizobium sp. M2E.F.Ca.ET.219.01.1.1
1	cellular organisms	Bacteria	Proteobacteria	Alphaproteobacteria	Rhodobacterales	Rhodobacteraceae	Maribius	unclassified Maribius	Maribius sp. THAF1
3	cellular organisms	Bacteria	Proteobacteria	Alphaproteobacteria	Caulobacterales	Caulobacteraceae	Caulobacter	unclassified Caulobacter	Caulobacter sp. BP25
1	cellular organisms	Bacteria	Proteobacteria	Alphaproteobacteria	Rickettsiales	Anaplasmataceae	Neorickettsia	unclassified Neorickettsia	Neorickettsia sp. 179522
2	cellular organisms	Bacteria	Proteobacteria	Alphaproteobacteria	Rhizobiales	Bradyrhizobiaceae	Afipia	unclassified Afipia	Afipia sp. TMED4
1	cellular organisms	Bacteria	Proteobacteria	Alphaproteobacteria	Rhodobacterales	Rhodobacteraceae	Paracoccus	unclassified Paracoccus	Paracoccus sp. TRP
1	cellular organisms	Bacteria	Proteobacteria	Alphaproteobacteria	Rhizobiales	Phyllobacteriaceae	Mesorhizobium	unclassified Mesorhizobium	Mesorhizobium sp. M00.F.Ca.ET.151.01.1.1
6	cellular organisms	Bacteria	Proteobacteria	Alphaproteobacteria	Sphingomonadales	Sphingomonadaceae	Novosphingobium	unclassified Novosphingobium	Novosphingobium sp. FSY-8
1	cellular organisms	Bacteria	Proteobacteria	Alphaproteobacteria	Rhizobiales	Phyllobacteriaceae	Mesorhizobium	unclassified Mesorhizobium	Mesorhizobium sp. LCM 4577
1	cellular organisms	Bacteria	Proteobacteria	Alphaproteobacteria	Rhizobiales	Phyllobacteriaceae	Mesorhizobium	unclassified Mesorhizobium	Mesorhizobium sp. M7A.F.Ca.CA.003.01.2.1
9	cellular organisms	Bacteria	Proteobacteria	Alphaproteobacteria	Rhodobacterales	Hyphomonadaceae	Ponticaulis	Ponticaulis koreensis
1	cellular organisms	Bacteria	Proteobacteria	Alphaproteobacteria	Pelagibacterales	Pelagibacteraceae	Candidatus Pelagibacter	unclassified Candidatus Pelagibacter	Candidatus Pelagibacter sp. TMED128
1	cellular organisms	Bacteria	Proteobacteria	Alphaproteobacteria	Rhizobiales	Rhizobiaceae	Liberibacter	Candidatus Liberibacter americanus
1	cellular organisms	Bacteria	Proteobacteria	Alphaproteobacteria	Rhodospirillales	Acetobacteraceae	Gluconobacter	Gluconobacter thailandicus	Gluconobacter thailandicus F149-1 = NBRC 100600
3	cellular organisms	Bacteria	Proteobacteria	Alphaproteobacteria	Rhizobiales	Methylobacteriaceae	Methylobacterium	unclassified Methylobacterium	Methylobacterium sp. Leaf85
1	cellular organisms	Bacteria	Proteobacteria	Alphaproteobacteria	Rhodospirillales	Rhodospirillaceae	Inquilinus	Inquilinus limosus	Inquilinus limosus MP06
3	cellular organisms	Bacteria	Proteobacteria	Alphaproteobacteria	Rhodobacterales	Rhodobacteraceae	Labrenzia	Labrenzia aggregata	Labrenzia aggregata IAM 12614
4	cellular organisms	Bacteria	Proteobacteria	Alphaproteobacteria	Sphingomonadales	Erythrobacteraceae	Porphyrobacter	unclassified Porphyrobacter	Porphyrobacter sp. HL-46
1	cellular organisms	Bacteria	Proteobacteria	Alphaproteobacteria	Rhodospirillales	Acetobacteraceae	Acetobacter	Acetobacter pomorum
6	cellular organisms	Bacteria	Proteobacteria	Alphaproteobacteria	Rickettsiales	Anaplasmataceae	Wolbachieae	Wolbachia
6	cellular organisms	Bacteria	Proteobacteria	Alphaproteobacteria	Rhizobiales	Rhizobiaceae	Liberibacter	Candidatus Liberibacter solanacearum
1	cellular organisms	Bacteria	Proteobacteria	Alphaproteobacteria	Rhodobacterales	Hyphomonadaceae	Oceanicaulis	unclassified Oceanicaulis	Oceanicaulis sp. 350
1	cellular organisms	Bacteria	Proteobacteria	Alphaproteobacteria	Rhizobiales	Hyphomicrobiaceae	Devosia	unclassified Devosia	Devosia sp. Leaf420
1	cellular organisms	Bacteria	Proteobacteria	Alphaproteobacteria	Rhizobiales	Phyllobacteriaceae	Mesorhizobium	unclassified Mesorhizobium	Mesorhizobium sp. M6A.T.Ca.TU.002.02.2.1
1	cellular organisms	Bacteria	Proteobacteria	Alphaproteobacteria	Rhodobacterales	Rhodobacteraceae	Pseudovibrio	unclassified Pseudovibrio	Pseudovibrio sp. FO-BEG1
4	cellular organisms	Bacteria	Proteobacteria	Alphaproteobacteria	Rhodobacterales	Rhodobacteraceae	Yangia	unclassified Yangia	Yangia sp. PrR004
2	cellular organisms	Bacteria	Proteobacteria	Alphaproteobacteria	Rhizobiales	unclassified Rhizobiales	unclassified Rhizobiales (miscellaneous)	Rhizobiales bacterium 39-66-18
4	cellular organisms	Bacteria	Proteobacteria	Alphaproteobacteria	Sphingomonadales	Sphingomonadaceae	Sphingobium	Sphingobium amiense
1	cellular organisms	Bacteria	Proteobacteria	Alphaproteobacteria	Rhizobiales	Rhizobiaceae	Rhizobium/Agrobacterium group	Rhizobium	Rhizobium oryzihabitans
6	cellular organisms	Bacteria	Proteobacteria	Alphaproteobacteria	Sphingomonadales	Sphingomonadaceae	Sphingomonas	unclassified Sphingomonas	Sphingomonas sp. PR090111-T3T-6A
6	cellular organisms	Bacteria	Proteobacteria	Alphaproteobacteria	Rhizobiales	Phyllobacteriaceae	unclassified Phyllobacteriaceae	Phyllobacteriaceae bacterium Water-Bin73
5	cellular organisms	Bacteria	Proteobacteria	Alphaproteobacteria	Rhizobiales	Phyllobacteriaceae	Mesorhizobium	unclassified Mesorhizobium	Mesorhizobium sp. ORS 3324
3	cellular organisms	Bacteria	Proteobacteria	Alphaproteobacteria	Rhizobiales	Hyphomicrobiaceae	Hyphomicrobium	unclassified Hyphomicrobium	Hyphomicrobium sp. 802
1	cellular organisms	Bacteria	Proteobacteria	Alphaproteobacteria	Rhodobacterales	Rhodobacteraceae	Pseudoruegeria	Pseudoruegeria sabulilitoris
3	cellular organisms	Bacteria	Proteobacteria	Alphaproteobacteria	Rhodobacterales	unclassified Rhodobacterales	Rhodobacterales bacterium CG18_big_fil_WC_8_21_14_2_50_71_9
3	cellular organisms	Bacteria	Proteobacteria	Alphaproteobacteria	Sphingomonadales	Sphingomonadaceae	Sphingomonas	unclassified Sphingomonas	Sphingomonas sp. Leaf22
2	cellular organisms	Bacteria	Proteobacteria	Alphaproteobacteria	Caulobacterales	Caulobacteraceae	Caulobacter	unclassified Caulobacter	Caulobacter sp. 774
2	cellular organisms	Bacteria	Proteobacteria	Alphaproteobacteria	Rhodospirillales	Acetobacteraceae	Commensalibacter	unclassified Commensalibacter
2	cellular organisms	Bacteria	Proteobacteria	Alphaproteobacteria	Rhizobiales	Rhizobiaceae	Rhizobium/Agrobacterium group	Rhizobium	unclassified Rhizobium	Rhizobium sp. AG855
1	cellular organisms	Bacteria	Proteobacteria	Alphaproteobacteria	Rhizobiales	Rhizobiaceae	Rhizobium/Agrobacterium group	Rhizobium	unclassified Rhizobium	Rhizobium sp. SEMIA 4085
1	cellular organisms	Bacteria	Proteobacteria	Alphaproteobacteria	Rhodospirillales	Rhodospirillaceae	Thalassospira	Thalassospira xianhensis
2	cellular organisms	Bacteria	Proteobacteria	Alphaproteobacteria	Rhizobiales	Bradyrhizobiaceae	Tardiphaga	unclassified Tardiphaga	Tardiphaga sp. OK245
8	cellular organisms	Bacteria	Proteobacteria	Alphaproteobacteria	Caulobacterales	unclassified Caulobacterales	Caulobacterales bacterium RIFOXYB1_FULL_67_16
1	cellular organisms	Bacteria	Proteobacteria	Alphaproteobacteria	Rhizobiales	Rhizobiaceae	Shinella	unclassified Shinella	Shinella sp. JR1-6
1	cellular organisms	Bacteria	Proteobacteria	Alphaproteobacteria	Rhizobiales	Phyllobacteriaceae	Mesorhizobium	unclassified Mesorhizobium	Mesorhizobium sp. M1A.T.Ca.IN.004.03.1.1
5	cellular organisms	Bacteria	Proteobacteria	Alphaproteobacteria	Rhodobacterales	Rhodobacteraceae	Paracoccus	unclassified Paracoccus	Paracoccus sp. Arc7-R13
1	cellular organisms	Bacteria	Proteobacteria	Alphaproteobacteria	Caulobacterales	Caulobacteraceae	Phenylobacterium	unclassified Phenylobacterium	Phenylobacterium sp. CCH12-B4
3	cellular organisms	Bacteria	Proteobacteria	Alphaproteobacteria	Rhodobacterales	Rhodobacteraceae	Roseibaca
2	cellular organisms	Bacteria	Proteobacteria	Alphaproteobacteria	Rhizobiales	Phyllobacteriaceae	Mesorhizobium	unclassified Mesorhizobium	Mesorhizobium sp. L2C084A000
2	cellular organisms	Bacteria	Proteobacteria	Alphaproteobacteria	Rhodospirillales	Acetobacteraceae	Acidiphilium	Acidiphilium cryptum
5	cellular organisms	Bacteria	Proteobacteria	Alphaproteobacteria	Rhizobiales	Rhizobiaceae	Rhizobium/Agrobacterium group	Rhizobium	unclassified Rhizobium	Rhizobium sp. WL3
1	cellular organisms	Bacteria	Proteobacteria	Alphaproteobacteria	Magnetococcales	Magnetococcaceae
1	cellular organisms	Bacteria	Proteobacteria	Alphaproteobacteria	Rhizobiales	Brucellaceae	Brucella	Brucella ovis
1	cellular organisms	Bacteria	Proteobacteria	Alphaproteobacteria	Rhizobiales	Methylobacteriaceae	Methylobacterium	unclassified Methylobacterium	Methylobacterium sp. WL7
1	cellular organisms	Bacteria	Proteobacteria	Alphaproteobacteria	Pelagibacterales	Pelagibacteraceae	unclassified Pelagibacteraceae	Pelagibacteraceae bacterium TMED247
1	cellular organisms	Bacteria	Proteobacteria	Alphaproteobacteria	Rickettsiales	Candidatus Deianiraeaceae	Candidatus Deianiraea	Candidatus Deianiraea vastatrix
4	cellular organisms	Bacteria	Proteobacteria	Alphaproteobacteria	Holosporales	Candidatus Paracaedibacteraceae	Candidatus Odyssella	Candidatus Odyssella thessalonicensis
3	cellular organisms	Bacteria	Proteobacteria	Alphaproteobacteria	Rhodobacterales	Rhodobacteraceae	Brevirhabdus	Brevirhabdus pacifica
3	cellular organisms	Bacteria	Proteobacteria	Alphaproteobacteria	Rhodospirillales	Rhodospirillaceae	Azospirillum	unclassified Azospirillum	Azospirillum sp. TSA6c
4	cellular organisms	Bacteria	Proteobacteria	Alphaproteobacteria	Rhizobiales	Bradyrhizobiaceae	Rhodopseudomonas	unclassified Rhodopseudomonas	Rhodopseudomonas sp. BR0M22
2	cellular organisms	Bacteria	Proteobacteria	Alphaproteobacteria	Caulobacterales	Caulobacteraceae	Caulobacter	unclassified Caulobacter	Caulobacter sp. D5
4	cellular organisms	Bacteria	Proteobacteria	Alphaproteobacteria	Rhizobiales	Hyphomicrobiaceae	Filomicrobium	Filomicrobium insigne
1	cellular organisms	Bacteria	Proteobacteria	Alphaproteobacteria	Rhizobiales	Phyllobacteriaceae	Mesorhizobium	unclassified Mesorhizobium	Mesorhizobium sp. M2C.T.Ca.TU.009.01.2.1
1	cellular organisms	Bacteria	Proteobacteria	Alphaproteobacteria	Sphingomonadales	Sphingomonadaceae	Blastomonas	Blastomonas fulva
1	cellular organisms	Bacteria	Proteobacteria	Alphaproteobacteria	Rhodobacterales	Rhodobacteraceae	Epibacterium
3	cellular organisms	Bacteria	Proteobacteria	Alphaproteobacteria	Caulobacterales	Caulobacteraceae	Brevundimonas	unclassified Brevundimonas	Brevundimonas sp. SGAir0440
8	cellular organisms	Bacteria	Proteobacteria	Alphaproteobacteria	Rhodospirillales	Rhodospirillaceae	Defluviicoccus	Candidatus Defluviicoccus seviourii
2	cellular organisms	Bacteria	Proteobacteria	Alphaproteobacteria	Holosporales
1	cellular organisms	Bacteria	Proteobacteria	Alphaproteobacteria	Sphingomonadales	Sphingomonadaceae	Sphingomonas	unclassified Sphingomonas	Sphingomonas sp. ABOLH
3	cellular organisms	Bacteria	Proteobacteria	Alphaproteobacteria	Rhizobiales	Rhizobiaceae	Rhizobium/Agrobacterium group	Neorhizobium	unclassified Neorhizobium	Neorhizobium sp. T7_12
4	cellular organisms	Bacteria	Proteobacteria	Alphaproteobacteria	Sphingomonadales	Sphingomonadaceae	Citromicrobium	unclassified Citromicrobium
1	cellular organisms	Bacteria	Proteobacteria	Alphaproteobacteria	Rhizobiales	Hyphomicrobiaceae	Devosia	unclassified Devosia	Devosia sp. SCN 66-27
2	cellular organisms	Bacteria	Proteobacteria	Alphaproteobacteria	Rhizobiales	Phyllobacteriaceae	Mesorhizobium	unclassified Mesorhizobium	Mesorhizobium sp. M4B.F.Ca.ET.017.02.2.1
1	cellular organisms	Bacteria	Proteobacteria	Alphaproteobacteria	Rhizobiales	Rhizobiaceae	Rhizobium/Agrobacterium group	Rhizobium	unclassified Rhizobium	Rhizobium sp. IE4771
2	cellular organisms	Bacteria	Proteobacteria	Alphaproteobacteria	Rhizobiales	Phyllobacteriaceae	Mesorhizobium	unclassified Mesorhizobium	Mesorhizobium sp. B1-1-4
1	cellular organisms	Bacteria	Proteobacteria	Alphaproteobacteria	Rhodobacterales	Rhodobacteraceae	unclassified Rhodobacteraceae	Rhodobacteraceae bacterium CH30
5	cellular organisms	Bacteria	Proteobacteria	Alphaproteobacteria	Rhizobiales	Bradyrhizobiaceae	Bradyrhizobium	unclassified Bradyrhizobium	Bradyrhizobium sp. DOA1
1	cellular organisms	Bacteria	Proteobacteria	Alphaproteobacteria	Rhizobiales	Phyllobacteriaceae	Mesorhizobium	unclassified Mesorhizobium	Mesorhizobium sp. M7A.F.Ca.CA.002.03.2.1
2	cellular organisms	Bacteria	Proteobacteria	Alphaproteobacteria	unclassified Alphaproteobacteria	unclassified Alphaproteobacteria (miscellaneous)	Alphaproteobacteria bacterium RIFCSPHIGHO2_02_FULL_46_13
2	cellular organisms	Bacteria	Proteobacteria	Alphaproteobacteria	Rhodobacterales	Rhodobacteraceae	Oceaniglobus
1	cellular organisms	Bacteria	Proteobacteria	Alphaproteobacteria	Rhizobiales	Rhizobiaceae	Rhizobium/Agrobacterium group	Rhizobium	unclassified Rhizobium	Rhizobium sp. CIAT894
1	cellular organisms	Bacteria	Proteobacteria	Alphaproteobacteria	Rhizobiales	Brucellaceae	Ochrobactrum	unclassified Ochrobactrum	Ochrobactrum sp. MYb49
5	cellular organisms	Bacteria	Proteobacteria	Alphaproteobacteria	Sphingomonadales	Erythrobacteraceae	Erythromicrobium	Erythromicrobium ramosum
2	cellular organisms	Bacteria	Proteobacteria	Alphaproteobacteria	Rhodospirillales	Acetobacteraceae	Gluconobacter	Gluconobacter kanchanaburiensis	Gluconobacter kanchanaburiensis NBRC 103587
3	cellular organisms	Bacteria	Proteobacteria	Alphaproteobacteria	Rhodobacterales	Rhodobacteraceae	Labrenzia	unclassified Labrenzia	Labrenzia sp. THAF35
10	cellular organisms	Bacteria	Proteobacteria	Alphaproteobacteria	unclassified Alphaproteobacteria	unclassified Alphaproteobacteria (miscellaneous)	Alphaproteobacteria bacterium PA3
1	cellular organisms	Bacteria	Proteobacteria	Alphaproteobacteria	Sphingomonadales	Sphingomonadaceae	Novosphingobium	unclassified Novosphingobium	Novosphingobium sp. TCA1
2	cellular organisms	Bacteria	Proteobacteria	Alphaproteobacteria	Rhizobiales	Bradyrhizobiaceae	Bradyrhizobium	unclassified Bradyrhizobium	Bradyrhizobium sp. AC87j1
1	cellular organisms	Bacteria	Proteobacteria	Alphaproteobacteria	Rhodospirillales	Acetobacteraceae	Neokomagataea	Neokomagataea tanensis
4	cellular organisms	Bacteria	Proteobacteria	Alphaproteobacteria	Rhizobiales	Rhizobiaceae	Rhizobium/Agrobacterium group	Rhizobium	unclassified Rhizobium	Rhizobium sp. 7209-2
1	cellular organisms	Bacteria	Proteobacteria	Alphaproteobacteria	Rhizobiales	Phyllobacteriaceae	Mesorhizobium	unclassified Mesorhizobium	Mesorhizobium sp. B2-4-2
8	cellular organisms	Bacteria	Proteobacteria	Alphaproteobacteria	Rhizobiales	Methylobacteriaceae	Methylobacterium	Methylobacterium variabile
6	cellular organisms	Bacteria	Proteobacteria	Alphaproteobacteria	Rhodobacterales	Rhodobacteraceae	Paracoccus	Paracoccus aminophilus	Paracoccus aminophilus JCM 7686
7	cellular organisms	Bacteria	Proteobacteria	Alphaproteobacteria	Sphingomonadales	Sphingomonadaceae	Sphingobium	Sphingobium algorifonticola
3	cellular organisms	Bacteria	Proteobacteria	Alphaproteobacteria	Rhodobacterales	Rhodobacteraceae	Nioella
6	cellular organisms	Bacteria	Proteobacteria	Alphaproteobacteria	Rhizobiales	Xanthobacteraceae	Xanthobacter	unclassified Xanthobacter	Xanthobacter sp. SG618
4	cellular organisms	Bacteria	Proteobacteria	Alphaproteobacteria	Rhizobiales	Bradyrhizobiaceae	Bosea	unclassified Bosea	Bosea sp. 12-68-7
1	cellular organisms	Bacteria	Proteobacteria	Alphaproteobacteria	Rhizobiales	Rhizobiaceae	Sinorhizobium/Ensifer group	Ensifer	unclassified Ensifer	Ensifer sp. MMN_5
1	cellular organisms	Bacteria	Proteobacteria	Alphaproteobacteria	Rickettsiales	unclassified Rickettsiales	unclassified Rickettsiales (miscellaneous)	Rickettsiales bacterium Ac37b
3	cellular organisms	Bacteria	Proteobacteria	Alphaproteobacteria	Rhodospirillales	Acetobacteraceae	Acidiphilium	Acidiphilium multivorum
1	cellular organisms	Bacteria	Proteobacteria	Alphaproteobacteria	Rhizobiales	Phyllobacteriaceae	Mesorhizobium	unclassified Mesorhizobium	Mesorhizobium sp. WSM3882
2	cellular organisms	Bacteria	Proteobacteria	Alphaproteobacteria	Rickettsiales	Rickettsiaceae	Candidatus Phycorickettsia	Candidatus Phycorickettsia trachydisci
3	cellular organisms	Bacteria	Proteobacteria	Alphaproteobacteria	Rhizobiales	Phyllobacteriaceae	Mesorhizobium	Mesorhizobium erdmanii
2	cellular organisms	Bacteria	Proteobacteria	Alphaproteobacteria	Caulobacterales	Caulobacteraceae	Caulobacter	unclassified Caulobacter	Caulobacter sp. HMWF009
2	cellular organisms	Bacteria	Proteobacteria	Alphaproteobacteria	Rhizobiales	Phyllobacteriaceae	Mesorhizobium	Mesorhizobium huakuii
2	cellular organisms	Bacteria	Proteobacteria	Alphaproteobacteria	Rhizobiales	unclassified Rhizobiales	unclassified Rhizobiales (miscellaneous)	Rhizobiales bacterium 35-66-30
9	cellular organisms	Bacteria	Proteobacteria	Alphaproteobacteria	Rhizobiales	Methylobacteriaceae	Methylorubrum	Methylorubrum populi
3	cellular organisms	Bacteria	Proteobacteria	Alphaproteobacteria	Rhizobiales	Phyllobacteriaceae	Mesorhizobium	unclassified Mesorhizobium	Mesorhizobium sp. M7A.F.Ca.ET.027.03.2.1
4	cellular organisms	Bacteria	Proteobacteria	Alphaproteobacteria	Sphingomonadales	Sphingomonadaceae	Sphingobium	unclassified Sphingobium	Sphingobium sp. CCH11-B1
1	cellular organisms	Bacteria	Proteobacteria	Alphaproteobacteria	Rhodospirillales	Acetobacteraceae	Komagataeibacter	Komagataeibacter xylinus	Komagataeibacter xylinus E25
3	cellular organisms	Bacteria	Proteobacteria	Alphaproteobacteria	Rhodobacterales	Rhodobacteraceae	Roseovarius	Roseovarius mucosus	Roseovarius mucosus DSM 17069
1	cellular organisms	Bacteria	Proteobacteria	Alphaproteobacteria	Sphingomonadales	unclassified Sphingomonadales	Sphingomonadales bacterium RIFCSPLOWO2_12_FULL_63_15
1	cellular organisms	Bacteria	Proteobacteria	Alphaproteobacteria	Rhodospirillales	Acetobacteraceae	Neokomagataea	unclassified Neokomagataea
1	cellular organisms	Bacteria	Proteobacteria	Alphaproteobacteria	Sphingomonadales	unclassified Sphingomonadales	Sphingomonadales bacterium 12-68-11
2	cellular organisms	Bacteria	Proteobacteria	Alphaproteobacteria	unclassified Alphaproteobacteria	unclassified Alphaproteobacteria (miscellaneous)	Alphaproteobacteria bacterium MarineAlpha9_Bin6
1	cellular organisms	Bacteria	Proteobacteria	Alphaproteobacteria	Rhizobiales	Rhizobiaceae	Rhizobium/Agrobacterium group	Rhizobium	unclassified Rhizobium	Rhizobium sp. 58
2	cellular organisms	Bacteria	Proteobacteria	Alphaproteobacteria	Rhizobiales	Methylobacteriaceae	Methylobacterium	unclassified Methylobacterium	Methylobacterium sp. Leaf125
12	cellular organisms	Bacteria	Proteobacteria	Alphaproteobacteria	Sphingomonadales	Sphingomonadaceae	Sphingomonas	unclassified Sphingomonas	Sphingomonas sp. MK52
9	cellular organisms	Bacteria	Proteobacteria	Alphaproteobacteria	Rhizobiales	Brucellaceae	Ochrobactrum	Ochrobactrum haematophilum
7	cellular organisms	Bacteria	Proteobacteria	Alphaproteobacteria	Sphingomonadales	Sphingomonadaceae	Sphingobium	Sphingobium faniae
1	cellular organisms	Bacteria	Proteobacteria	Alphaproteobacteria	Rhizobiales	Rhizobiaceae	Rhizobium/Agrobacterium group	Rhizobium	unclassified Rhizobium	Rhizobium sp. AC27/96
4	cellular organisms	Bacteria	Proteobacteria	Alphaproteobacteria	Rhizobiales	Rhizobiaceae	Rhizobium/Agrobacterium group	Rhizobium	Rhizobium arenae
2	cellular organisms	Bacteria	Proteobacteria	Alphaproteobacteria	Rhizobiales	Phyllobacteriaceae	Mesorhizobium	unclassified Mesorhizobium	Mesorhizobium sp. M5C.F.Cr.IN.023.01.1.1
8	cellular organisms	Bacteria	Proteobacteria	Alphaproteobacteria	Rhodobacterales	Rhodobacteraceae	Planktotalea
1	cellular organisms	Bacteria	Proteobacteria	Alphaproteobacteria	Rhizobiales	Methylobacteriaceae	Methylobacterium	unclassified Methylobacterium	Methylobacterium sp. WL69
1	cellular organisms	Bacteria	Proteobacteria	Alphaproteobacteria	Rhizobiales	Phyllobacteriaceae	Phyllobacterium	unclassified Phyllobacterium	Phyllobacterium sp. YR620
9	cellular organisms	Bacteria	Proteobacteria	Alphaproteobacteria	Rhodospirillales	Acetobacteraceae	Acidiphilium	unclassified Acidiphilium
1	cellular organisms	Bacteria	Proteobacteria	Alphaproteobacteria	Rhodobacterales	Rhodobacteraceae	Thioclava	unclassified Thioclava	Thioclava sp. F42-5
1	cellular organisms	Bacteria	Proteobacteria	Alphaproteobacteria	Rhizobiales	Rhizobiaceae	Sinorhizobium/Ensifer group	Sinorhizobium	unclassified Sinorhizobium	Sinorhizobium sp. GL28
6	cellular organisms	Bacteria	Proteobacteria	Alphaproteobacteria	Rhizobiales	Hyphomicrobiaceae	Rhodoplanes	unclassified Rhodoplanes	Rhodoplanes sp. JGI PP 4-B12
2	cellular organisms	Bacteria	Proteobacteria	Alphaproteobacteria	Rhizobiales	Rhizobiaceae	Rhizobium/Agrobacterium group	Rhizobium	unclassified Rhizobium	Rhizobium sp. RU33A
1	cellular organisms	Bacteria	Proteobacteria	Alphaproteobacteria	Rhodospirillales	Acetobacteraceae	Acetobacter	Acetobacter orleanensis
5	cellular organisms	Bacteria	Proteobacteria	Alphaproteobacteria	unclassified Alphaproteobacteria	unclassified Alphaproteobacteria (miscellaneous)	Alphaproteobacteria bacterium TMED54
8	cellular organisms	Bacteria	Proteobacteria	Alphaproteobacteria	Rhizobiales	Rhizobiaceae	Rhizobium/Agrobacterium group	Rhizobium	unclassified Rhizobium	Rhizobium sp. ICMP 5592
1	cellular organisms	Bacteria	Proteobacteria	Alphaproteobacteria	Rhizobiales	Phyllobacteriaceae	Mesorhizobium	unclassified Mesorhizobium	Mesorhizobium sp. B2-3-13
4	cellular organisms	Bacteria	Proteobacteria	Alphaproteobacteria	Rhizobiales	Bradyrhizobiaceae	Bradyrhizobium	unclassified Bradyrhizobium	Bradyrhizobium sp. NFR13
7	cellular organisms	Bacteria	Proteobacteria	Alphaproteobacteria	Sphingomonadales	Sphingomonadaceae	Sphingomonas	unclassified Sphingomonas	Sphingomonas sp. PP-F2F-G114-C0414
3	cellular organisms	Bacteria	Proteobacteria	Alphaproteobacteria	Sphingomonadales	Sphingomonadaceae	Novosphingobium	unclassified Novosphingobium	Novosphingobium sp. ERN07
4	cellular organisms	Bacteria	Proteobacteria	Alphaproteobacteria	Rhizobiales	Rhizobiaceae	Rhizobium/Agrobacterium group	Rhizobium	unclassified Rhizobium	Rhizobium sp. CF394
2	cellular organisms	Bacteria	Proteobacteria	Alphaproteobacteria	Rhizobiales	Phyllobacteriaceae	Mesorhizobium	unclassified Mesorhizobium	Mesorhizobium sp. B2-4-11
4	cellular organisms	Bacteria	Proteobacteria	Alphaproteobacteria	Rhodobacterales	Rhodobacteraceae	Labrenzia	unclassified Labrenzia	Labrenzia sp. EL143
2	cellular organisms	Bacteria	Proteobacteria	Alphaproteobacteria	Sphingomonadales	Sphingomonadaceae	Hankyongella	Hankyongella ginsenosidimutans
1	cellular organisms	Bacteria	Proteobacteria	Alphaproteobacteria	Rhodobacterales	Rhodobacteraceae	Salipiger	Salipiger mucosus	Salipiger mucosus DSM 16094
10	cellular organisms	Bacteria	Proteobacteria	Alphaproteobacteria	Rhodospirillales	Rhodospirillaceae	Magnetospirillum	unclassified Magnetospirillum	Magnetospirillum sp. 64-120
6	cellular organisms	Bacteria	Proteobacteria	Alphaproteobacteria	Rhodobacterales	Rhodobacteraceae	Rhodovulum	unclassified Rhodovulum	Rhodovulum sp. NI22
1	cellular organisms	Bacteria	Proteobacteria	Alphaproteobacteria	Rhizobiales	Phyllobacteriaceae	Mesorhizobium	Mesorhizobium mediterraneum
2	cellular organisms	Bacteria	Proteobacteria	Alphaproteobacteria	Sphingomonadales	Erythrobacteraceae	Porphyrobacter	unclassified Porphyrobacter
11	cellular organisms	Bacteria	Proteobacteria	Alphaproteobacteria	Rhizobiales	Rhizobiaceae	Rhizobium/Agrobacterium group	Agrobacterium	unclassified Agrobacterium	Agrobacterium sp. a22-2
4	cellular organisms	Bacteria	Proteobacteria	Alphaproteobacteria	Rhizobiales	Methylobacteriaceae	Methylobacterium	unclassified Methylobacterium	Methylobacterium sp. 77
4	cellular organisms	Bacteria	Proteobacteria	Alphaproteobacteria	Rhizobiales	Rhizobiaceae	Sinorhizobium/Ensifer group	Ensifer	unclassified Ensifer	Ensifer sp. YR511
8	cellular organisms	Bacteria	Proteobacteria	Alphaproteobacteria	Sphingomonadales	Sphingomonadaceae	Sphingomonas	unclassified Sphingomonas	Sphingomonas sp. S-NIH.Pt15_0812
6	cellular organisms	Bacteria	Proteobacteria	Alphaproteobacteria	Sphingomonadales	Erythrobacteraceae	Croceicoccus	Croceicoccus pelagius
3	cellular organisms	Bacteria	Proteobacteria	Alphaproteobacteria	Rhodobacterales	Rhodobacteraceae	Rhodobacter	Rhodobacter thermarum
2	cellular organisms	Bacteria	Proteobacteria	Alphaproteobacteria	Sphingomonadales	Sphingomonadaceae	Novosphingobium	unclassified Novosphingobium	Novosphingobium sp. SCN 66-18
11	cellular organisms	Bacteria	Proteobacteria	Alphaproteobacteria	Rhizobiales	Phyllobacteriaceae	Mesorhizobium	unclassified Mesorhizobium	Mesorhizobium sp. 3P27G6
1	cellular organisms	Bacteria	Proteobacteria	Alphaproteobacteria	Rhizobiales	Rhizobiaceae	unclassified Rhizobiaceae	Rhizobiaceae bacterium CRRU44
2	cellular organisms	Bacteria	Proteobacteria	Alphaproteobacteria	unclassified Alphaproteobacteria	unclassified Alphaproteobacteria (miscellaneous)	Alphaproteobacteria bacterium MarineAlpha6_Bin3
6	cellular organisms	Bacteria	Proteobacteria	Alphaproteobacteria	Caulobacterales	Caulobacteraceae	Caulobacter	unclassified Caulobacter	Caulobacter sp. Root487D2Y
1	cellular organisms	Bacteria	Proteobacteria	Alphaproteobacteria	Rhodospirillales	Rhodospirillaceae	Thalassospira	unclassified Thalassospira	Thalassospira sp. GB04J01
1	cellular organisms	Bacteria	Proteobacteria	Alphaproteobacteria	Rhodobacterales	Hyphomonadaceae	Hyphomonas	unclassified Hyphomonas	Hyphomonas sp. 34-62-18
1	cellular organisms	Bacteria	Proteobacteria	Alphaproteobacteria	Rhizobiales	Methylobacteriaceae	Methylobacterium	unclassified Methylobacterium	Methylobacterium sp. Leaf104
11	cellular organisms	Bacteria	Proteobacteria	Alphaproteobacteria	Rhodospirillales	Rhodospirillaceae	Phaeospirillum	Phaeospirillum fulvum
9	cellular organisms	Bacteria	Proteobacteria	Alphaproteobacteria	Rhodobacterales	Rhodobacteraceae	Paracoccus	Paracoccus versutus
9	cellular organisms	Bacteria	Proteobacteria	Alphaproteobacteria	Sphingomonadales	Sphingomonadaceae	Sphingomonas	unclassified Sphingomonas	Sphingomonas sp. PAMC 26621
4	cellular organisms	Bacteria	Proteobacteria	Alphaproteobacteria	Rhizobiales	Rhizobiaceae	Rhizobium/Agrobacterium group	Rhizobium	unclassified Rhizobium	Rhizobium sp. OK665
2	cellular organisms	Bacteria	Proteobacteria	Alphaproteobacteria	Kordiimonadales
1	cellular organisms	Bacteria	Proteobacteria	Alphaproteobacteria	Rhizobiales	Rhizobiaceae	Sinorhizobium/Ensifer group	Ensifer	unclassified Ensifer	Ensifer sp. AP48
4	cellular organisms	Bacteria	Proteobacteria	Alphaproteobacteria	Sphingomonadales	Erythrobacteraceae	Porphyrobacter	Porphyrobacter cryptus
3	cellular organisms	Bacteria	Proteobacteria	Alphaproteobacteria	Rhodospirillales	Acetobacteraceae	Acetobacter	Acetobacter okinawensis
1	cellular organisms	Bacteria	Proteobacteria	Alphaproteobacteria	Rhodobacterales	Rhodobacteraceae	Dinoroseobacter	Dinoroseobacter shibae	Dinoroseobacter shibae DFL 12 = DSM 16493
4	cellular organisms	Bacteria	Proteobacteria	Alphaproteobacteria	Rhizobiales	Methylocystaceae	Methylosinus	Methylosinus sporium
1	cellular organisms	Bacteria	Proteobacteria	Alphaproteobacteria	Rhizobiales	Phyllobacteriaceae	Mesorhizobium	unclassified Mesorhizobium	Mesorhizobium sp. LSHC414A00
7	cellular organisms	Bacteria	Proteobacteria	Alphaproteobacteria	Rhizobiales	Rhizobiaceae	Rhizobium/Agrobacterium group	Rhizobium	Rhizobium etli
4	cellular organisms	Bacteria	Proteobacteria	Alphaproteobacteria	Rhizobiales	Rhizobiaceae	Rhizobium/Agrobacterium group	Rhizobium	unclassified Rhizobium	Rhizobium sp. 2MFCol3.1
2	cellular organisms	Bacteria	Proteobacteria	Alphaproteobacteria	Rhodobacterales	Rhodobacteraceae	Leisingera	unclassified Leisingera	Leisingera sp. ANG-S5
11	cellular organisms	Bacteria	Proteobacteria	Alphaproteobacteria	Rhizobiales	Hyphomicrobiaceae	Filomicrobium	Candidatus Filomicrobium marinum
3	cellular organisms	Bacteria	Proteobacteria	Alphaproteobacteria	Rhizobiales	Xanthobacteraceae	Azorhizobium	unclassified Azorhizobium	Azorhizobium sp. 35-67-5
1	cellular organisms	Bacteria	Proteobacteria	Alphaproteobacteria	Pelagibacterales	Pelagibacteraceae	unclassified Pelagibacteraceae	Pelagibacteraceae bacterium TMED237
2	cellular organisms	Bacteria	Proteobacteria	Alphaproteobacteria	Rhodobacterales	Rhodobacteraceae	Rhodobacter	Rhodobacter sphaeroides	Rhodobacter sphaeroides f. sp. denitrificans
2	cellular organisms	Bacteria	Proteobacteria	Alphaproteobacteria	environmental samples	uncultured alpha proteobacterium EB080_L84F03
4	cellular organisms	Bacteria	Proteobacteria	Alphaproteobacteria	Rhizobiales	Rhizobiaceae	Rhizobium/Agrobacterium group	Agrobacterium	Agrobacterium rubi
1	cellular organisms	Bacteria	Proteobacteria	Alphaproteobacteria	unclassified Alphaproteobacteria	unclassified Alphaproteobacteria (miscellaneous)	Alphaproteobacteria bacterium RIFCSPHIGHO2_12_FULL_45_9
2	cellular organisms	Bacteria	Proteobacteria	Alphaproteobacteria	Rhizobiales	Phyllobacteriaceae	Phyllobacterium	unclassified Phyllobacterium	Phyllobacterium sp. CL33Tsu
1	cellular organisms	Bacteria	Proteobacteria	Alphaproteobacteria	Rhodobacterales	Rhodobacteraceae	Paracoccus	unclassified Paracoccus	Paracoccus sp. FO-3
1	cellular organisms	Bacteria	Proteobacteria	Alphaproteobacteria	Rickettsiales	Anaplasmataceae	Ehrlichia	canis group	Ehrlichia ruminantium
1	cellular organisms	Bacteria	Proteobacteria	Alphaproteobacteria	Rhizobiales	Phyllobacteriaceae	Mesorhizobium	unclassified Mesorhizobium	Mesorhizobium sp. L103C565B0
1	cellular organisms	Bacteria	Proteobacteria	Alphaproteobacteria	Rhizobiales	Phyllobacteriaceae	Mesorhizobium	unclassified Mesorhizobium	Mesorhizobium sp. B2-8-3
1	cellular organisms	Bacteria	Proteobacteria	Alphaproteobacteria	Rhizobiales	Rhizobiaceae	Sinorhizobium/Ensifer group	Sinorhizobium	unclassified Sinorhizobium	Sinorhizobium sp. A49
4	cellular organisms	Bacteria	Proteobacteria	Alphaproteobacteria	Rhodobacterales	Rhodobacteraceae	Boseongicola	unclassified Boseongicola	Boseongicola sp. TAW-CT132
7	cellular organisms	Bacteria	Proteobacteria	Alphaproteobacteria	Rhizobiales	Rhizobiaceae	Rhizobium/Agrobacterium group	Rhizobium	Rhizobium mesoamericanum
10	cellular organisms	Bacteria	Proteobacteria	Alphaproteobacteria	Rhodobacterales	Rhodobacteraceae	Sulfitobacter	Sulfitobacter pontiacus	Sulfitobacter pontiacus 3SOLIMAR09
7	cellular organisms	Bacteria	Proteobacteria	Alphaproteobacteria	Sphingomonadales	Erythrobacteraceae	Erythrobacter	unclassified Erythrobacter	Erythrobacter sp. SCN 62-14
9	cellular organisms	Bacteria	Proteobacteria	Alphaproteobacteria	Rhodospirillales	Rhodospirillaceae	Thalassospira	Thalassospira mesophila
3	cellular organisms	Bacteria	Proteobacteria	Alphaproteobacteria	Rhodospirillales	Acetobacteraceae	Acetobacter	Acetobacter estunensis
3	cellular organisms	Bacteria	Proteobacteria	Alphaproteobacteria	Rhizobiales	Rhizobiaceae	Rhizobium/Agrobacterium group	Rhizobium	unclassified Rhizobium	Rhizobium sp. Leaf391
6	cellular organisms	Bacteria	Proteobacteria	Alphaproteobacteria	Rhodobacterales	Rhodobacteraceae	Paenirhodobacter	unclassified Paenirhodobacter	Paenirhodobacter sp. MME-103
13	cellular organisms	Bacteria	Proteobacteria	Alphaproteobacteria	Rhizobiales	Rhizobiaceae	Shinella	unclassified Shinella	Shinella sp.
1	cellular organisms	Bacteria	Proteobacteria	Alphaproteobacteria	Rhizobiales	Bartonellaceae	Bartonella	Bartonella saheliensis
11	cellular organisms	Bacteria	Proteobacteria	Alphaproteobacteria	Rhodobacterales	Rhodobacteraceae	Jannaschia	unclassified Jannaschia
3	cellular organisms	Bacteria	Proteobacteria	Alphaproteobacteria	Rhizobiales	Methylocystaceae	Methylocystis	unclassified Methylocystis	Methylocystis sp. SC2
2	cellular organisms	Bacteria	Proteobacteria	Alphaproteobacteria	Rhizobiales	Rhodobiaceae	Lutibaculum	Lutibaculum baratangense	Lutibaculum baratangense AMV1
3	cellular organisms	Bacteria	Proteobacteria	Alphaproteobacteria	Rhizobiales	Phyllobacteriaceae	Mesorhizobium	unclassified Mesorhizobium	Mesorhizobium sp. CNPSo 3140
9	cellular organisms	Bacteria	Proteobacteria	Alphaproteobacteria	Rhizobiales	Methylobacteriaceae	Methylobacterium	unclassified Methylobacterium	Methylobacterium sp. BTF04
1	cellular organisms	Bacteria	Proteobacteria	Alphaproteobacteria	Pelagibacterales	Pelagibacteraceae	Candidatus Pelagibacter	unclassified Candidatus Pelagibacter	Candidatus Pelagibacter sp. TMED202
9	cellular organisms	Bacteria	Proteobacteria	Alphaproteobacteria	Rhizobiales	Brucellaceae	Falsochrobactrum	unclassified Falsochrobactrum	Falsochrobactrum sp. HN4
4	cellular organisms	Bacteria	Proteobacteria	Alphaproteobacteria	Sphingomonadales	Sphingomonadaceae	Sphingomonas	unclassified Sphingomonas	Sphingomonas sp. 2SG
7	cellular organisms	Bacteria	Proteobacteria	Alphaproteobacteria	Pelagibacterales	Pelagibacteraceae	unclassified Pelagibacteraceae	alpha proteobacterium HIMB59
6	cellular organisms	Bacteria	Proteobacteria	Alphaproteobacteria	Rhodobacterales	Rhodobacteraceae	Roseivivax	unclassified Roseivivax	Roseivivax sp. THAF30
4	cellular organisms	Bacteria	Proteobacteria	Alphaproteobacteria	Rhizobiales	Rhizobiaceae	Rhizobium/Agrobacterium group	Rhizobium	unclassified Rhizobium	Rhizobium sp. YR519
3	cellular organisms	Bacteria	Proteobacteria	Alphaproteobacteria	Sphingomonadales	Sphingomonadaceae	Sandaracinobacter	unclassified Sandaracinobacter	Sandaracinobacter sp. PAMC 28131
2	cellular organisms	Bacteria	Proteobacteria	Alphaproteobacteria	Rhizobiales	Brucellaceae	Brucella	unclassified Brucella
6	cellular organisms	Bacteria	Proteobacteria	Alphaproteobacteria	Sphingomonadales	Sphingomonadaceae	Sphingobium	Sphingobium bisphenolivorans
3	cellular organisms	Bacteria	Proteobacteria	Alphaproteobacteria	Rhodospirillales	Rhodospirillaceae	Magnetospirillum	unclassified Magnetospirillum
2	cellular organisms	Bacteria	Proteobacteria	Alphaproteobacteria	Sphingomonadales	Sphingomonadaceae	Sphingomonas	Sphingomonas histidinilytica
5	cellular organisms	Bacteria	Proteobacteria	Alphaproteobacteria	Rhizobiales	Rhizobiaceae	Rhizobium/Agrobacterium group	Rhizobium	unclassified Rhizobium	Rhizobium sp. Root1203
2	cellular organisms	Bacteria	Proteobacteria	Alphaproteobacteria	Rhizobiales	Rhizobiaceae	Rhizobium/Agrobacterium group	Rhizobium	unclassified Rhizobium	Rhizobium sp. CF142
2	cellular organisms	Bacteria	Proteobacteria	Alphaproteobacteria	Rhodobacterales	Hyphomonadaceae	Robiginitomaculum
4	cellular organisms	Bacteria	Proteobacteria	Alphaproteobacteria	Sphingomonadales	Erythrobacteraceae	Erythrobacter	Erythrobacter suaedae
1	cellular organisms	Bacteria	Proteobacteria	Alphaproteobacteria	Caulobacterales	Caulobacteraceae	Caulobacter	unclassified Caulobacter	Caulobacter sp. 12-67-6
1	cellular organisms	Bacteria	Proteobacteria	Alphaproteobacteria	Rhizobiales	Phyllobacteriaceae	Mesorhizobium	unclassified Mesorhizobium	Mesorhizobium sp. LSJC269B00
2	cellular organisms	Bacteria	Proteobacteria	Alphaproteobacteria	Rhodospirillales	Acetobacteraceae	Kozakia	Kozakia baliensis
1	cellular organisms	Bacteria	Proteobacteria	Alphaproteobacteria	Pelagibacterales	Pelagibacteraceae	unclassified Pelagibacteraceae	Pelagibacteraceae bacterium GOM-A3
2	cellular organisms	Bacteria	Proteobacteria	Alphaproteobacteria	Rhodobacterales	Rhodobacteraceae	Pseudovibrio	Pseudovibrio denitrificans
1	cellular organisms	Bacteria	Proteobacteria	Alphaproteobacteria	Sphingomonadales	Sphingomonadaceae	Sphingomonas	Sphingomonas olei
1	cellular organisms	Bacteria	Proteobacteria	Alphaproteobacteria	Rhizobiales	Rhizobiaceae	Rhizobium/Agrobacterium group	Rhizobium	unclassified Rhizobium	Rhizobium sp. BK068
2	cellular organisms	Bacteria	Proteobacteria	Alphaproteobacteria	Rhizobiales	Xanthobacteraceae	Azorhizobium	unclassified Azorhizobium	Azorhizobium sp. 32-67-21
5	cellular organisms	Bacteria	Proteobacteria	Alphaproteobacteria	Rhizobiales	Methylobacteriaceae	Methylobacterium	unclassified Methylobacterium	Methylobacterium sp. Leaf123
1	cellular organisms	Bacteria	Proteobacteria	Alphaproteobacteria	Caulobacterales	Caulobacteraceae	Brevundimonas	unclassified Brevundimonas	Brevundimonas sp. Leaf168
14	cellular organisms	Bacteria	Proteobacteria	Alphaproteobacteria	Sphingomonadales	Sphingomonadaceae	Stakelama	Stakelama pacifica
2	cellular organisms	Bacteria	Proteobacteria	Alphaproteobacteria	Sphingomonadales	Erythrobacteraceae	Erythrobacter	unclassified Erythrobacter	Erythrobacter sp. HI0020
9	cellular organisms	Bacteria	Proteobacteria	Alphaproteobacteria	Rhizobiales	Bradyrhizobiaceae	Bradyrhizobium	unclassified Bradyrhizobium	Bradyrhizobium sp. MOS003
2	cellular organisms	Bacteria	Proteobacteria	Alphaproteobacteria	Rhizobiales	Rhizobiaceae	Rhizobium/Agrobacterium group	Rhizobium	unclassified Rhizobium	Rhizobium sp. BK315
2	cellular organisms	Bacteria	Proteobacteria	Alphaproteobacteria	Rhizobiales	Rhizobiaceae	Rhizobium/Agrobacterium group	Rhizobium	Rhizobium azibense
3	cellular organisms	Bacteria	Proteobacteria	Alphaproteobacteria	Rhodospirillales	Rhodospirillaceae	Caenispirillum
1	cellular organisms	Bacteria	Proteobacteria	Alphaproteobacteria	Rhodospirillales	Acetobacteraceae	Acidocella	Acidocella facilis
7	cellular organisms	Bacteria	Proteobacteria	Alphaproteobacteria	Rhodobacterales	Rhodobacteraceae	Rhodobacter	Rhodobacter flagellatus
1	cellular organisms	Bacteria	Proteobacteria	Alphaproteobacteria	Rhizobiales	Bartonellaceae	Bartonella	unclassified Bartonella
9	cellular organisms	Bacteria	Proteobacteria	Alphaproteobacteria	Rhizobiales	Bradyrhizobiaceae	Tardiphaga	unclassified Tardiphaga	Tardiphaga sp. P9-11
4	cellular organisms	Bacteria	Proteobacteria	Alphaproteobacteria	Sphingomonadales	Sphingomonadaceae	Novosphingobium	Novosphingobium taihuense
3	cellular organisms	Bacteria	Proteobacteria	Alphaproteobacteria	Rhizobiales	Phyllobacteriaceae	Mesorhizobium	unclassified Mesorhizobium	Mesorhizobium sp. LSJC268A00
1	cellular organisms	Bacteria	Proteobacteria	Alphaproteobacteria	Holosporales	Holosporaceae	unclassified Holosporaceae	endosymbiont of Acanthamoeba sp. UWC8
5	cellular organisms	Bacteria	Proteobacteria	Alphaproteobacteria	Rhizobiales	Rhizobiaceae	Rhizobium/Agrobacterium group	Rhizobium	Rhizobium leucaenae
3	cellular organisms	Bacteria	Proteobacteria	Alphaproteobacteria	Rhizobiales	Rhodobiaceae	Tepidicaulis	unclassified Tepidicaulis	Tepidicaulis sp. EA10
8	cellular organisms	Bacteria	Proteobacteria	Alphaproteobacteria	Rhizobiales	Rhizobiaceae	Rhizobium/Agrobacterium group	Rhizobium	Rhizobium smilacinae
1	cellular organisms	Bacteria	Proteobacteria	Alphaproteobacteria	Rhizobiales	Rhizobiaceae	Rhizobium/Agrobacterium group	Rhizobium	unclassified Rhizobium	Rhizobium sp. BK463
1	cellular organisms	Bacteria	Proteobacteria	Alphaproteobacteria	Rhizobiales	Bradyrhizobiaceae	Rhodopseudomonas	unclassified Rhodopseudomonas	Rhodopseudomonas sp. WA056
9	cellular organisms	Bacteria	Proteobacteria	Alphaproteobacteria	Rhodospirillales	Rhodospirillaceae	Phaeospirillum	Phaeospirillum molischianum
6	cellular organisms	Bacteria	Proteobacteria	Alphaproteobacteria	Caulobacterales	Caulobacteraceae	Brevundimonas	unclassified Brevundimonas	Brevundimonas sp. 12-68-7
10	cellular organisms	Bacteria	Proteobacteria	Alphaproteobacteria	Rhizobiales	Rhizobiaceae	Rhizobium/Agrobacterium group	Rhizobium	unclassified Rhizobium	Rhizobium sp. LCM 4573
8	cellular organisms	Bacteria	Proteobacteria	Alphaproteobacteria	Rhizobiales	Phyllobacteriaceae	Mesorhizobium	unclassified Mesorhizobium	Mesorhizobium sp. B2-1-3A
4	cellular organisms	Bacteria	Proteobacteria	Alphaproteobacteria	Sphingomonadales	Erythrobacteraceae	unclassified Erythrobacteraceae	Erythrobacteraceae bacterium CCH12-C2
3	cellular organisms	Bacteria	Proteobacteria	Alphaproteobacteria	Rhodospirillales	Acetobacteraceae	Swingsia	unclassified Swingsia	Swingsia sp. F3b2
2	cellular organisms	Bacteria	Proteobacteria	Alphaproteobacteria	Rickettsiales	Rickettsiaceae	Rickettsieae	Orientia
8	cellular organisms	Bacteria	Proteobacteria	Alphaproteobacteria	Caulobacterales	Caulobacteraceae	Caulobacter	unclassified Caulobacter	Caulobacter sp. UNC358MFTsu5.1
11	cellular organisms	Bacteria	Proteobacteria	Alphaproteobacteria	Rhizobiales	Bradyrhizobiaceae	Afipia	unclassified Afipia	Afipia sp.
1	cellular organisms	Bacteria	Proteobacteria	Alphaproteobacteria	Rhizobiales	Bartonellaceae	Bartonella	unclassified Bartonella	Bartonella sp. A46
6	cellular organisms	Bacteria	Proteobacteria	Alphaproteobacteria	Rhodobacterales	Rhodobacteraceae	Phaeobacter	unclassified Phaeobacter	Phaeobacter sp. CECT 7735
3	cellular organisms	Bacteria	Proteobacteria	Alphaproteobacteria	Rhodobacterales	Rhodobacteraceae	Roseovarius	unclassified Roseovarius	Roseovarius sp. EC-HK134
3	cellular organisms	Bacteria	Proteobacteria	Alphaproteobacteria	Rhizobiales	Rhizobiaceae	Shinella	unclassified Shinella	Shinella sp. UYSO24
4	cellular organisms	Bacteria	Proteobacteria	Alphaproteobacteria	Rhodospirillales	Rhodospirillaceae	Azospirillum	Azospirillum lipoferum	Azospirillum lipoferum 4B
7	cellular organisms	Bacteria	Proteobacteria	Alphaproteobacteria	Rhizobiales	Methylobacteriaceae	Methylobacterium	unclassified Methylobacterium	Methylobacterium sp. 17Sr1-39
1	cellular organisms	Bacteria	Proteobacteria	Alphaproteobacteria	Rhodobacterales	unclassified Rhodobacterales	Rhodobacterales bacterium 32-64-14
11	cellular organisms	Bacteria	Proteobacteria	Alphaproteobacteria	Rhodospirillales	Rhodospirillaceae	Azospirillum	Azospirillum doebereinerae
1	cellular organisms	Bacteria	Proteobacteria	Alphaproteobacteria	Rhizobiales	Bradyrhizobiaceae	Afipia	Afipia broomeae	Afipia broomeae ATCC 49717
6	cellular organisms	Bacteria	Proteobacteria	Alphaproteobacteria	Sphingomonadales	Erythrobacteraceae	Erythrobacter	Erythrobacter flavus
2	cellular organisms	Bacteria	Proteobacteria	Alphaproteobacteria	Rhizobiales	Phyllobacteriaceae	Mesorhizobium	unclassified Mesorhizobium	Mesorhizobium sp. B2-8-9
2	cellular organisms	Bacteria	Proteobacteria	Alphaproteobacteria	Rhizobiales	Phyllobacteriaceae	Mesorhizobium	unclassified Mesorhizobium	Mesorhizobium sp. LNJC395A00
7	cellular organisms	Bacteria	Proteobacteria	Alphaproteobacteria	Sphingomonadales	Sphingomonadaceae	Sandarakinorhabdus	unclassified Sandarakinorhabdus	Sandarakinorhabdus sp. AAP62
2	cellular organisms	Bacteria	Proteobacteria	Alphaproteobacteria	Rhizobiales	Rhizobiaceae	Sinorhizobium/Ensifer group	Sinorhizobium	unclassified Sinorhizobium	Sinorhizobium sp. GL2
8	cellular organisms	Bacteria	Proteobacteria	Alphaproteobacteria	Sphingomonadales	Erythrobacteraceae	Altererythrobacter	unclassified Altererythrobacter	Altererythrobacter sp. BO-6
7	cellular organisms	Bacteria	Proteobacteria	Alphaproteobacteria	Sphingomonadales	Sphingomonadaceae	Sphingomonas	unclassified Sphingomonas	Sphingomonas sp. NFR15
2	cellular organisms	Bacteria	Proteobacteria	Alphaproteobacteria	Rhizobiales	Bradyrhizobiaceae	Bradyrhizobium	unclassified Bradyrhizobium	Bradyrhizobium sp. 58S1
2	cellular organisms	Bacteria	Proteobacteria	Alphaproteobacteria	Rhizobiales	Methylobacteriaceae	Methylobacterium	Methylobacterium indicum
5	cellular organisms	Bacteria	Proteobacteria	Alphaproteobacteria	Rhizobiales	Xanthobacteraceae	Azorhizobium	unclassified Azorhizobium	Azorhizobium sp. 39-67-5
19	cellular organisms	Bacteria	Proteobacteria	Alphaproteobacteria	Rhizobiales	Bradyrhizobiaceae	Rhodopseudomonas	unclassified Rhodopseudomonas	Rhodopseudomonas sp. B29
2	cellular organisms	Bacteria	Proteobacteria	Alphaproteobacteria	Rhizobiales	Hyphomicrobiaceae	Rhodoplanes	Rhodoplanes serenus
1	cellular organisms	Bacteria	Proteobacteria	Alphaproteobacteria	Rhodospirillales	Rhodospirillaceae	Nitrospirillum	Nitrospirillum amazonense	Nitrospirillum amazonense Y2
12	cellular organisms	Bacteria	Proteobacteria	Alphaproteobacteria	Sphingomonadales	Sphingomonadaceae	Zymomonas	unclassified Zymomonas	Zymomonas sp.
3	cellular organisms	Bacteria	Proteobacteria	Alphaproteobacteria	Rhizobiales	Bradyrhizobiaceae	Bradyrhizobium	unclassified Bradyrhizobium	Bradyrhizobium sp. th.b2
11	cellular organisms	Bacteria	Proteobacteria	Alphaproteobacteria	Sphingomonadales	Sphingomonadaceae	Novosphingobium	Novosphingobium nitrogenifigens
1	cellular organisms	Bacteria	Proteobacteria	Alphaproteobacteria	Rhodobacterales	Rhodobacteraceae	Sulfitobacter	unclassified Sulfitobacter	Sulfitobacter sp. DFL14
7	cellular organisms	Bacteria	Proteobacteria	Alphaproteobacteria	Sphingomonadales	Sphingomonadaceae	Sphingopyxis	unclassified Sphingopyxis	Sphingopyxis sp. EG6
4	cellular organisms	Bacteria	Proteobacteria	Alphaproteobacteria	Sphingomonadales	Sphingomonadaceae	Sphingomonas	Sphingomonas pituitosa
9	cellular organisms	Bacteria	Proteobacteria	Alphaproteobacteria	Rhizobiales	unclassified Rhizobiales	unclassified Rhizobiales (miscellaneous)	Rhizobiales bacterium 2SD
4	cellular organisms	Bacteria	Proteobacteria	Alphaproteobacteria	Sphingomonadales	Erythrobacteraceae	Porphyrobacter	unclassified Porphyrobacter	Porphyrobacter sp. YT40
3	cellular organisms	Bacteria	Proteobacteria	Alphaproteobacteria	Rhizobiales	Rhizobiaceae	Rhizobium/Agrobacterium group	Rhizobium	unclassified Rhizobium	Rhizobium sp. SG741
1	cellular organisms	Bacteria	Proteobacteria	Alphaproteobacteria	Rhodobacterales	Rhodobacteraceae	Celeribacter	Celeribacter baekdonensis	Celeribacter baekdonensis B30
8	cellular organisms	Bacteria	Proteobacteria	Alphaproteobacteria	Rhizobiales	Bradyrhizobiaceae	Bradyrhizobium	unclassified Bradyrhizobium	Bradyrhizobium sp. Ghvi
1	cellular organisms	Bacteria	Proteobacteria	Alphaproteobacteria	Rhizobiales	Rhizobiaceae	Liberibacter	Candidatus Liberibacter africanus
3	cellular organisms	Bacteria	Proteobacteria	Alphaproteobacteria	Rhizobiales	Xanthobacteraceae	Starkeya	unclassified Starkeya	Starkeya sp. HF14-78462
1	cellular organisms	Bacteria	Proteobacteria	Alphaproteobacteria	Rhizobiales	Phyllobacteriaceae	Mesorhizobium	unclassified Mesorhizobium	Mesorhizobium sp. B2-4-18
1	cellular organisms	Bacteria	Proteobacteria	Alphaproteobacteria	Rhizobiales	Phyllobacteriaceae	Mesorhizobium	unclassified Mesorhizobium	Mesorhizobium sp. M7A.F.Ca.US.002.01.1.1
1	cellular organisms	Bacteria	Proteobacteria	Alphaproteobacteria	Rhizobiales	Methylobacteriaceae	Methylobacterium	unclassified Methylobacterium	Methylobacterium sp. WL8
7	cellular organisms	Bacteria	Proteobacteria	Alphaproteobacteria	Sphingomonadales	Sphingomonadaceae	Novosphingobium	unclassified Novosphingobium	Novosphingobium sp. SYSU G00007
17	cellular organisms	Bacteria	Proteobacteria	Alphaproteobacteria	Rhodobacterales	Rhodobacteraceae	Roseobacter	unclassified Roseobacter	Roseobacter sp. MED193
31	cellular organisms	Bacteria	Proteobacteria	Alphaproteobacteria	Rhodobacterales	Rhodobacteraceae	Paracoccus	Paracoccus lutimaris
26	cellular organisms	Bacteria	Proteobacteria	Alphaproteobacteria	Rhodobacterales	Rhodobacteraceae	Sulfitobacter	unclassified Sulfitobacter	Sulfitobacter sp. CB2047
25	cellular organisms	Bacteria	Proteobacteria	Alphaproteobacteria	Rhodospirillales	Acetobacteraceae	Roseomonas	unclassified Roseomonas	Roseomonas sp. AR75
8	cellular organisms	Bacteria	Proteobacteria	Alphaproteobacteria	Rhodobacterales	Hyphomonadaceae	Hyphomonas	unclassified Hyphomonas	Hyphomonas sp. L-53-1-40
3	cellular organisms	Bacteria	Proteobacteria	Alphaproteobacteria	Rhizobiales	Rhizobiaceae	Rhizobium/Agrobacterium group	Pararhizobium	Pararhizobium antarcticum
5	cellular organisms	Bacteria	Proteobacteria	Alphaproteobacteria	Rhizobiales	Rhizobiaceae	Rhizobium/Agrobacterium group	Rhizobium	Rhizobium undicola
19	cellular organisms	Bacteria	Proteobacteria	Alphaproteobacteria	Rhodobacterales	Rhodobacteraceae	Thalassobius	Thalassobius mediterraneus
7	cellular organisms	Bacteria	Proteobacteria	Alphaproteobacteria	Rhizobiales	Hyphomicrobiaceae	Devosia	unclassified Devosia	Devosia sp. L53-10-65
1	cellular organisms	Bacteria	Proteobacteria	Alphaproteobacteria	Rhizobiales	Bradyrhizobiaceae	Tardiphaga	unclassified Tardiphaga	Tardiphaga sp. CF115
14	cellular organisms	Bacteria	Proteobacteria	Alphaproteobacteria	Rhodobacterales	Rhodobacteraceae	Paracoccus	Paracoccus solventivorans
2	cellular organisms	Bacteria	Proteobacteria	Alphaproteobacteria	Sphingomonadales	Sphingomonadaceae	Sphingobium	unclassified Sphingobium	Sphingobium sp. TKS
1	cellular organisms	Bacteria	Proteobacteria	Alphaproteobacteria	Sphingomonadales	Sphingomonadaceae	Novosphingobium	unclassified Novosphingobium	Novosphingobium sp. NDB2Meth1
5	cellular organisms	Bacteria	Proteobacteria	Alphaproteobacteria	Rhodobacterales	Rhodobacteraceae	Roseovarius	unclassified Roseovarius	Roseovarius sp. A46
47	cellular organisms	Bacteria	Proteobacteria	Alphaproteobacteria	Sphingomonadales	Sphingomonadaceae	Sphingosinicella	unclassified Sphingosinicella	Sphingosinicella sp. YJ22
2	cellular organisms	Bacteria	Proteobacteria	Alphaproteobacteria	Rhodobacterales	Rhodobacteraceae	Roseivivax	Roseivivax halodurans	Roseivivax halodurans JCM 10272
31	cellular organisms	Bacteria	Proteobacteria	Alphaproteobacteria	Rhodobacterales	Rhodobacteraceae	Roseibium	Roseibium sediminis
65	cellular organisms	Bacteria	Proteobacteria	Alphaproteobacteria	Rhodobacterales	Rhodobacteraceae	Paracoccus	unclassified Paracoccus	Paracoccus sp.
2	cellular organisms	Bacteria	Proteobacteria	Alphaproteobacteria	Rhodobacterales	Rhodobacteraceae	Rubellimicrobium	Rubellimicrobium thermophilum	Rubellimicrobium thermophilum DSM 16684
11	cellular organisms	Bacteria	Proteobacteria	Alphaproteobacteria	Sphingomonadales	Sphingomonadaceae	Novosphingobium	unclassified Novosphingobium	Novosphingobium sp. Fuku2-ISO-50
50	cellular organisms	Bacteria	Proteobacteria	Alphaproteobacteria	Rhizobiales	Phyllobacteriaceae	Aminobacter	unclassified Aminobacter
18	cellular organisms	Bacteria	Proteobacteria	Alphaproteobacteria	Rhodobacterales	Rhodobacteraceae	Maribius	Maribius pelagius
2	cellular organisms	Bacteria	Proteobacteria	Alphaproteobacteria	Rhizobiales	Rhizobiaceae	Rhizobium/Agrobacterium group	Rhizobium	unclassified Rhizobium	Rhizobium sp. AP16
2	cellular organisms	Bacteria	Proteobacteria	Alphaproteobacteria	Rhodobacterales	Acuticoccaceae	Acuticoccus	Acuticoccus yangtzensis
15	cellular organisms	Bacteria	Proteobacteria	Alphaproteobacteria	Sphingomonadales	Erythrobacteraceae	Altererythrobacter	Altererythrobacter endophyticus
25	cellular organisms	Bacteria	Proteobacteria	Alphaproteobacteria	Caulobacterales	Caulobacteraceae	Caulobacter	unclassified Caulobacter	Caulobacter sp. S45
27	cellular organisms	Bacteria	Proteobacteria	Alphaproteobacteria	Rhodobacterales	Rhodobacteraceae	Sulfitobacter	unclassified Sulfitobacter	Sulfitobacter sp. EL44
9	cellular organisms	Bacteria	Proteobacteria	Alphaproteobacteria	Rhizobiales	Rhizobiaceae	Rhizobium/Agrobacterium group	Rhizobium	Rhizobium naphthalenivorans
42	cellular organisms	Bacteria	Proteobacteria	Alphaproteobacteria	Rhizobiales	Methylobacteriaceae	Microvirga	Microvirga aerophila
2	cellular organisms	Bacteria	Proteobacteria	Alphaproteobacteria	Rhodospirillales	Acetobacteraceae	Roseomonas	unclassified Roseomonas	Roseomonas sp. Z23
38	cellular organisms	Bacteria	Proteobacteria	Alphaproteobacteria	Rhodobacterales	Rhodobacteraceae	Rubellimicrobium	Rubellimicrobium rubrum
2	cellular organisms	Bacteria	Proteobacteria	Alphaproteobacteria	Rhizobiales	Brucellaceae	Ochrobactrum	Ochrobactrum pseudintermedium
2	cellular organisms	Bacteria	Proteobacteria	Alphaproteobacteria	Rhizobiales	Brucellaceae	Ochrobactrum	Ochrobactrum gallinifaecis
45	cellular organisms	Bacteria	Proteobacteria	Alphaproteobacteria	Rhizobiales	Phyllobacteriaceae	Pseudaminobacter	Pseudaminobacter salicylatoxidans
5	cellular organisms	Bacteria	Proteobacteria	Alphaproteobacteria	Rhodospirillales	Rhodospirillaceae	Magnetospirillum	unclassified Magnetospirillum	Magnetospirillum sp. LM-5
216	cellular organisms	Bacteria	Proteobacteria	Alphaproteobacteria	Rhodobacterales	Rhodobacteraceae	Sulfitobacter	unclassified Sulfitobacter	Sulfitobacter sp. JBTF-M27
44	cellular organisms	Bacteria	Proteobacteria	Alphaproteobacteria	Rhodobacterales	Rhodobacteraceae	Roseivivax	Roseivivax isoporae
6	cellular organisms	Bacteria	Proteobacteria	Alphaproteobacteria	Sphingomonadales	Sphingomonadaceae	Sphingopyxis	unclassified Sphingopyxis	Sphingopyxis sp. FD7
4	cellular organisms	Bacteria	Proteobacteria	Alphaproteobacteria	Rhizobiales	Rhizobiaceae	Sinorhizobium/Ensifer group	Ensifer	unclassified Ensifer	Ensifer sp. Root31
[truncated: 21,113 more rows]
[truncated: 1 more columns]

## Sheet: Eukaryota
Read count	Classification	Domain	Clade	Kingdom	subkingdom	Phylum	Class	Order	Family	Genus	Species	Strain	Other
1	cellular organisms	Eukaryota	Amoebozoa			Evosea	Eumycetozoa	Dictyostelia	Acytosteliales	Acytosteliaceae	Acytostelium	Acytostelium leptosomum
2	cellular organisms	Eukaryota	Amoebozoa			Discosea	Flabellinia	Dactylopodida	Paramoebidae	Paramoeba	Paramoeba pemaquidensis
1	cellular organisms	Eukaryota	Amoebozoa			Evosea	Eumycetozoa	Dictyostelia	Dictyosteliales
2	cellular organisms	Eukaryota	Amoebozoa			Evosea	Archamoebae	Mastigamoebida	Entamoebidae	Entamoeba
1	cellular organisms	Eukaryota	Amoebozoa			Evosea	Eumycetozoa	Dictyostelia	Dictyosteliales	Dictyosteliaceae	Dictyostelium
4	cellular organisms	Eukaryota	Amoebozoa			Evosea	Eumycetozoa	Dictyostelia	Acytosteliales	Acytosteliaceae	Heterostelium	Heterostelium album	Heterostelium album PN500
1	cellular organisms	Eukaryota	Amoebozoa			Evosea	Archamoebae	Mastigamoebida	Entamoebidae	Entamoeba	Entamoeba invadens	Entamoeba invadens IP1
6	cellular organisms	Eukaryota	Amoebozoa			Evosea	Eumycetozoa	Dictyostelia	Dictyosteliales	Dictyosteliaceae	Polysphondylium	Polysphondylium violaceum
1	cellular organisms	Eukaryota	Amoebozoa			Discosea	Longamoebia	Centramoebida	Acanthamoebidae	Acanthamoeba
8	cellular organisms	Eukaryota	Amoebozoa			Evosea	Eumycetozoa	Dictyostelia	Acytosteliales	Acytosteliaceae	Acytostelium	Acytostelium subglobosum	Acytostelium subglobosum LB1
1	cellular organisms	Eukaryota	Amoebozoa			Evosea	Eumycetozoa	Dictyostelia	Dictyosteliales	Dictyosteliaceae	Dictyostelium	Dictyostelium discoideum
3	cellular organisms	Eukaryota	Amoebozoa			Evosea	Eumycetozoa	Dictyostelia	Dictyosteliales	Raperosteliaceae	Tieghemostelium	Tieghemostelium lacteum
1	cellular organisms	Eukaryota	Amoebozoa			Evosea	Eumycetozoa	Dictyostelia
1	cellular organisms	Eukaryota	Amoebozoa
4	cellular organisms	Eukaryota	Amoebozoa			Evosea	Eumycetozoa	Dictyostelia	Dictyosteliales	Dictyosteliaceae	Dictyostelium	Dictyostelium purpureum
32	cellular organisms	Eukaryota	Amoebozoa			Discosea	Longamoebia	Centramoebida	Acanthamoebidae	Acanthamoeba	Acanthamoeba castellanii	Acanthamoeba castellanii str. Neff
20	cellular organisms	Eukaryota	Amoebozoa			Evosea	Variosea	Cavosteliida	Cavosteliaceae	Planoprotostelium	Planoprotostelium fungivorum
1	cellular organisms	Eukaryota	Amoebozoa			Evosea	Archamoebae	Mastigamoebida	Mastigamoebidae	Mastigamoeba	Mastigamoeba balamuthi
5	cellular organisms	Eukaryota	Amoebozoa			Evosea	Eumycetozoa	Dictyostelia	Acytosteliales	Cavenderiaceae	Cavenderia	Cavenderia fasciculata
13	cellular organisms	Eukaryota	Apusozoa						Apusomonadidae	Thecamonas	Thecamonas trahens	Thecamonas trahens ATCC 50062
3	cellular organisms	Eukaryota	CRuMs						Collodictyonidae	Diphylleia	Diphylleia rotans
1	cellular organisms	Eukaryota	Cryptophyceae				Pyrenomonadales	Geminigeraceae	Teleaulax	Teleaulax amphioxeia
8	cellular organisms	Eukaryota	Cryptophyceae				Pyrenomonadales	Geminigeraceae	Guillardia	Guillardia theta	Guillardia theta CCMP2712
1	cellular organisms	Eukaryota	Cryptophyceae				Pyrenomonadales	Pyrenomonadaceae	Pyrenomonas	Pyrenomonas salina
1	cellular organisms	Eukaryota	Discoba	Euglenozoa	Kinetoplastea	Metakinetoplastina	Parabodonida	Procryptobia	Procryptobia sorokini
1	cellular organisms	Eukaryota	Discoba	Euglenozoa	Euglenida	Spirocuta	Euglenophyceae	Euglenales	Euglenaceae	Monomorphina	Monomorphina pseudopyrum
1	cellular organisms	Eukaryota	Discoba	Jakobida	Andalucina	Andaluciidae	Andalucia	Andalucia godoyi
1	cellular organisms	Eukaryota	Discoba	Euglenozoa	Kinetoplastea	Metakinetoplastina	Trypanosomatida	Trypanosomatidae	Leishmaniinae
1	cellular organisms	Eukaryota	Discoba	Euglenozoa	Kinetoplastea	Metakinetoplastina	Trypanosomatida	Trypanosomatidae	Trypanosoma	Trypanosoma	Trypanosoma conorhini
1	cellular organisms	Eukaryota	Discoba	Euglenozoa	Kinetoplastea	Metakinetoplastina	Trypanosomatida	Trypanosomatidae	Leishmaniinae	Leishmania	Leishmania donovani species complex
2	cellular organisms	Eukaryota	Discoba	Euglenozoa	Kinetoplastea	Metakinetoplastina	Trypanosomatida	Trypanosomatidae	Trypanosoma	Schizotrypanum	Trypanosoma cruzi
1	cellular organisms	Eukaryota	Discoba	Euglenozoa	Kinetoplastea	Metakinetoplastina	Trypanosomatida	Trypanosomatidae	Strigomonadinae	Angomonas	Angomonas desouzai
2	cellular organisms	Eukaryota	Discoba	Euglenozoa	Kinetoplastea	Metakinetoplastina	Trypanosomatida	Trypanosomatidae	Phytomonas	unclassified Phytomonas
1	cellular organisms	Eukaryota	Discoba	Euglenozoa	Kinetoplastea	Metakinetoplastina	Trypanosomatida	Trypanosomatidae	Leishmaniinae	Leptomonas	Leptomonas pyrrhocoris
1	cellular organisms	Eukaryota	Discoba	Euglenozoa	Kinetoplastea	Metakinetoplastina	Trypanosomatida	Trypanosomatidae	Trypanosoma	Herpetosoma	Trypanosoma rangeli
1	cellular organisms	Eukaryota	Discoba	Euglenozoa	Kinetoplastea	Metakinetoplastina	Trypanosomatida	Trypanosomatidae	Leishmaniinae	Leishmania	Viannia
1	cellular organisms	Eukaryota	Discoba	Euglenozoa	Kinetoplastea	Metakinetoplastina
2	cellular organisms	Eukaryota	Discoba	Euglenozoa	Kinetoplastea	Metakinetoplastina	Trypanosomatida	Trypanosomatidae	Strigomonadinae	Angomonas	Angomonas deanei
3	cellular organisms	Eukaryota	Discoba	Euglenozoa	Kinetoplastea	Metakinetoplastina	Trypanosomatida	Trypanosomatidae	Trypanosoma	Nannomonas	Trypanosoma congolense	Trypanosoma congolense IL3000
15	cellular organisms	Eukaryota	Discoba	Euglenozoa	Kinetoplastea	Metakinetoplastina	Eubodonida	Bodonidae	Bodo	Bodo saltans
3	cellular organisms	Eukaryota	Discoba	Euglenozoa	Kinetoplastea	Metakinetoplastina	Trypanosomatida	Trypanosomatidae	Phytomonas	unclassified Phytomonas	Phytomonas sp. isolate EM1
2	cellular organisms	Eukaryota	Discoba	Jakobida	Andalucina	Stygiellidae	Stygiella	Stygiella incarcerata
3	cellular organisms	Eukaryota	Discoba	Euglenozoa	Kinetoplastea	Metakinetoplastina	Trypanosomatida	Trypanosomatidae	Trypanosoma	Duttonella	Trypanosoma vivax	Trypanosoma vivax Y486
1	cellular organisms	Eukaryota	Discoba	Euglenozoa	Kinetoplastea	Metakinetoplastina	Trypanosomatida	Trypanosomatidae	Trypanosoma	Herpetosoma	Trypanosoma rangeli	Trypanosoma rangeli SC58
4	cellular organisms	Eukaryota	Discoba	Heterolobosea	Tetramitia	Eutetramitia	Vahlkampfiidae	Naegleria	Naegleria gruberi
1	cellular organisms	Eukaryota	Discoba	Euglenozoa	Kinetoplastea	Metakinetoplastina	Trypanosomatida	Trypanosomatidae	Leishmaniinae	Leishmania	lizard Leishmania	Leishmania tarentolae
1	cellular organisms	Eukaryota	Discoba	Euglenozoa	Kinetoplastea	Prokinetoplastina	Ichthyobodonidae	Perkinsela	unclassified Perkinsela	Perkinsela sp. CCAP 1560/4
1	cellular organisms	Eukaryota	Discoba	Jakobida	Jakobida incertae sedis	Ophirina	Ophirina amphinema
1	cellular organisms	Eukaryota	Discoba	Euglenozoa	Kinetoplastea	Metakinetoplastina	Trypanosomatida	Trypanosomatidae	Leishmaniinae	Leptomonas	Leptomonas seymouri
4	cellular organisms	Eukaryota	Discoba	Euglenozoa	Kinetoplastea	Metakinetoplastina	Trypanosomatida	Trypanosomatidae	Trypanosoma	Trypanosoma with unspecified subgenus	Trypanosoma theileri
5	cellular organisms	Eukaryota	Discoba	Euglenozoa	Kinetoplastea	Metakinetoplastina	Trypanosomatida	Trypanosomatidae	Trypanosoma
1	cellular organisms	Eukaryota	Discoba	Heterolobosea	Tetramitia	Eutetramitia	Vahlkampfiidae	Naegleria
5	cellular organisms	Eukaryota	Discoba	Euglenozoa	Kinetoplastea	Metakinetoplastina	Trypanosomatida	Trypanosomatidae	Strigomonadinae	Strigomonas	Strigomonas culicis
2	cellular organisms	Eukaryota	Discoba	Euglenozoa	Kinetoplastea	Metakinetoplastina	Trypanosomatida	Trypanosomatidae	Trypanosoma	Trypanozoon
4	cellular organisms	Eukaryota	Discoba	Heterolobosea	Tetramitia	Eutetramitia	Vahlkampfiidae	Naegleria	Naegleria fowleri
1	cellular organisms	Eukaryota	Discoba	Euglenozoa	Kinetoplastea	Metakinetoplastina	Trypanosomatida	Trypanosomatidae	Trypanosoma	Trypanosoma with unspecified subgenus	Trypanosoma grayi
2	cellular organisms	Eukaryota	Discoba	Euglenozoa	Kinetoplastea	Metakinetoplastina	Trypanosomatida	Trypanosomatidae	Phytomonas	unclassified Phytomonas	Phytomonas sp. isolate Hart1
1	cellular organisms	Eukaryota	Discoba	Euglenozoa	Kinetoplastea	Metakinetoplastina	Trypanosomatida	Trypanosomatidae	Trypanosoma	Schizotrypanum	Trypanosoma cruzi	Trypanosoma cruzi marinkellei
1	cellular organisms	Eukaryota	Eukaryota incertae sedis	Palpitomonas	Palpitomonas bilix
1	cellular organisms	Eukaryota	Glaucocystophyceae	Cyanophoraceae	Cyanophora	Cyanophora sudae
1	cellular organisms	Eukaryota	Haptista	Haptophyta	Prymnesiophyceae
1	cellular organisms	Eukaryota	Haptista	Haptophyta	Prymnesiophyceae	Phaeocystales	Phaeocystaceae	Phaeocystis
20	cellular organisms	Eukaryota	Haptista	Haptophyta	Prymnesiophyceae	Isochrysidales	Noelaerhabdaceae	Emiliania	Emiliania huxleyi	Emiliania huxleyi CCMP1516
11	cellular organisms	Eukaryota	Haptista	Haptophyta	Prymnesiophyceae	Prymnesiales	Chrysochromulinaceae	Chrysochromulina	Chrysochromulina tobinii
1	cellular organisms	Eukaryota	Metamonada	Fornicata	Diplomonadida	Hexamitidae	Giardiinae	Giardia	Giardia muris
1	cellular organisms	Eukaryota	Metamonada	Fornicata	Diplomonadida	Hexamitidae	Giardiinae	Giardia	Giardia intestinalis
7	cellular organisms	Eukaryota	Metamonada	Parabasalia	Tritrichomonadida	Tritrichomonadidae	Tritrichomonas	Tritrichomonas foetus
3	cellular organisms	Eukaryota	Metamonada	Parabasalia	Trichomonadida	Trichomonadidae	Trichomonas	Trichomonas vaginalis	Trichomonas vaginalis G3
6	cellular organisms	Eukaryota	Metamonada	Preaxostyla	Oxymonadida	Streblomastigidae	Streblomastix	Streblomastix strix
1	cellular organisms	Eukaryota	Opisthokonta	Fungi	Dikarya	Basidiomycota	Ustilaginomycotina	Ustilaginomycetes	Ustilaginales	Ustilaginaceae	Sporisorium	Sporisorium graminicola
1	cellular organisms	Eukaryota	Opisthokonta	Fungi	Dikarya	Ascomycota	saccharomyceta	Pezizomycotina	leotiomyceta	Eurotiomycetes	Eurotiomycetidae	Eurotiales	Aspergillaceae	Aspergillus	Aspergillus carbonarius	Aspergillus carbonarius ITEM 5010
1	cellular organisms	Eukaryota	Opisthokonta	Fungi	Dikarya	Ascomycota	saccharomyceta	Pezizomycotina	leotiomyceta	dothideomyceta	Dothideomycetes	Dothideomycetidae	Mycosphaerellales	Mycosphaerellaceae	Zymoseptoria	Zymoseptoria tritici	Zymoseptoria tritici ST99CH_1A5
1	cellular organisms	Eukaryota	Opisthokonta	Fungi	Dikarya	Basidiomycota	Agaricomycotina	Tremellomycetes	Tremellales	Trimorphomycetaceae	Trimorphomyces	Trimorphomyces papilionaceus
1	cellular organisms	Eukaryota	Opisthokonta	Fungi	Dikarya	Ascomycota	saccharomyceta	Pezizomycotina	leotiomyceta	sordariomyceta	Sordariomycetes	Hypocreomycetidae	Glomerellales	Glomerellaceae	Colletotrichum	Colletotrichum sublineola
1	cellular organisms	Eukaryota	Opisthokonta	Fungi	Dikarya	Basidiomycota	Agaricomycotina	Agaricomycetes	Agaricomycetes incertae sedis	Polyporales	Polyporaceae	Trametes	Trametes cinnabarina
2	cellular organisms	Eukaryota	Opisthokonta	Fungi	Dikarya	Basidiomycota	Agaricomycotina	Agaricomycetes	Agaricomycetes incertae sedis	Polyporales	Fomitopsidaceae	Fomitopsis	Fomitopsis pinicola	Fomitopsis pinicola FP-58527 SS1
1	cellular organisms	Eukaryota	Opisthokonta	Fungi	Dikarya	Ascomycota	saccharomyceta	Pezizomycotina	leotiomyceta	sordariomyceta	Leotiomycetes	Leotiomycetes incertae sedis	Pseudeurotiaceae	Pseudogymnoascus	unclassified Pseudogymnoascus	Pseudogymnoascus sp. VKM F-3808
1	cellular organisms	Eukaryota	Opisthokonta	Fungi	Dikarya	Ascomycota	saccharomyceta	Pezizomycotina	leotiomyceta	Lecanoromycetes	OSLEUM clade	Lecanoromycetidae	Lecanorales	Lecanorineae	Cladoniaceae	Cladonia	Cladonia leporina
1	cellular organisms	Eukaryota	Opisthokonta	Fungi	Dikarya	Ascomycota	saccharomyceta	Pezizomycotina	leotiomyceta	Eurotiomycetes	Chaetothyriomycetidae	Chaetothyriales	Herpotrichiellaceae	Cladophialophora	Cladophialophora carrionii
1	cellular organisms	Eukaryota	Opisthokonta	Fungi	Dikarya	Ascomycota	saccharomyceta	Pezizomycotina	leotiomyceta	sordariomyceta	Sordariomycetes	Xylariomycetidae	Xylariales	Hypoxylaceae	Daldinia
1	cellular organisms	Eukaryota	Opisthokonta	Fungi	Dikarya	Ascomycota	saccharomyceta	Saccharomycotina	Saccharomycetes	Saccharomycetales	Debaryomycetaceae	Candida/Lodderomyces clade	Candida	Candida orthopsilosis	Candida orthopsilosis Co 90-125
1	cellular organisms	Eukaryota	Opisthokonta	Fungi	Dikarya	Ascomycota	saccharomyceta	Pezizomycotina	leotiomyceta	sordariomyceta	Leotiomycetes	Helotiales	Lachnaceae	Lachnellula	Lachnellula arida
2	cellular organisms	Eukaryota	Opisthokonta	Fungi	Dikarya	Ascomycota	saccharomyceta	Saccharomycotina	Saccharomycetes	Saccharomycetales	Debaryomycetaceae	Debaryomyces	Debaryomyces fabryi
1	cellular organisms	Eukaryota	Opisthokonta	Fungi	Dikarya	Ascomycota	saccharomyceta	Pezizomycotina	leotiomyceta	sordariomyceta	Leotiomycetes	Helotiales	Lachnaceae	Lachnellula	Lachnellula cervina
1	cellular organisms	Eukaryota	Opisthokonta	Fungi	Dikarya	Ascomycota	saccharomyceta	Pezizomycotina	leotiomyceta	dothideomyceta	Dothideomycetes	Dothideomycetidae	Mycosphaerellales	Mycosphaerellaceae	Cercospora	Cercospora zeae-maydis	Cercospora zeae-maydis SCOH1-5
1	cellular organisms	Eukaryota	Opisthokonta	Fungi	Dikarya	Ascomycota	saccharomyceta	Pezizomycotina	leotiomyceta	sordariomyceta	Leotiomycetes	Helotiales	Helotiales incertae sedis	Rhynchosporium	Rhynchosporium secalis
2	cellular organisms	Eukaryota	Opisthokonta	Fungi	Dikarya	Ascomycota	saccharomyceta	Pezizomycotina	Orbiliomycetes	Orbiliales	Orbiliaceae
1	cellular organisms	Eukaryota	Opisthokonta	Fungi	Dikarya	Ascomycota	saccharomyceta	Pezizomycotina	leotiomyceta	Lecanoromycetes	OSLEUM clade	Lecanoromycetidae	Lecanorales	Lecanorineae	Cladoniaceae	Cladonia	Cladonia subtenuis
1	cellular organisms	Eukaryota	Opisthokonta	Fungi	Dikarya	Ascomycota	saccharomyceta	Pezizomycotina	leotiomyceta	sordariomyceta	Leotiomycetes	Leotiomycetes incertae sedis	Pseudeurotiaceae	Pseudogymnoascus	unclassified Pseudogymnoascus	Pseudogymnoascus sp. VKM F-3775
1	cellular organisms	Eukaryota	Opisthokonta	Fungi	Fungi incertae sedis	Microsporidia
1	cellular organisms	Eukaryota	Opisthokonta	Fungi	Dikarya	Ascomycota	saccharomyceta	Pezizomycotina	leotiomyceta	sordariomyceta	Sordariomycetes	Hypocreomycetidae	Glomerellales	Glomerellaceae	Colletotrichum	Colletotrichum orbiculare species complex
2	cellular organisms	Eukaryota	Opisthokonta	Fungi	Dikarya	Basidiomycota	Agaricomycotina	Agaricomycetes	Agaricomycetes incertae sedis	Polyporales	Polyporaceae	Ganoderma	Ganoderma boninense
1	cellular organisms	Eukaryota	Opisthokonta	Fungi	Dikarya	Basidiomycota	Pucciniomycotina	Microbotryomycetes	Leucosporidiales	Leucosporidiaceae	Leucosporidium
1	cellular organisms	Eukaryota	Opisthokonta	Fungi	Dikarya	Basidiomycota	Agaricomycotina	Tremellomycetes	Tremellales	Cryptococcaceae	Cryptococcus	Cryptococcus gattii species complex	Cryptococcus gattii VGIII	Cryptococcus gattii CA1280
1	cellular organisms	Eukaryota	Opisthokonta	Fungi	Dikarya	Ascomycota	saccharomyceta	Saccharomycotina	Saccharomycetes	Saccharomycetales	Dipodascaceae	Saprochaete	Saprochaete ingens
2	cellular organisms	Eukaryota	Opisthokonta	Fungi	Dikarya	Basidiomycota	Agaricomycotina	Agaricomycetes	Agaricomycetes incertae sedis	Polyporales	Dacryobolaceae	Postia	Postia placenta
2	cellular organisms	Eukaryota	Opisthokonta	Fungi	Fungi incertae sedis	Mucoromycota	Mucoromycotina	Mucoromycetes	Mucorales	Cunninghamellaceae	Absidia
2	cellular organisms	Eukaryota	Opisthokonta	Fungi	Dikarya	Basidiomycota	Agaricomycotina	Agaricomycetes	Agaricomycetes incertae sedis	Polyporales	Meruliaceae	Phlebia	Phlebia centrifuga
2	cellular organisms	Eukaryota	Opisthokonta	Fungi	Dikarya	Ascomycota	saccharomyceta	Pezizomycotina	leotiomyceta	sordariomyceta	Leotiomycetes	Leotiomycetes incertae sedis	Pseudeurotiaceae	Pseudogymnoascus	unclassified Pseudogymnoascus	Pseudogymnoascus sp. WSF 3629
2	cellular organisms	Eukaryota	Opisthokonta	Fungi	Dikarya	Ascomycota	saccharomyceta	Pezizomycotina	leotiomyceta	sordariomyceta	Sordariomycetes	Hypocreomycetidae	Hypocreales	Cordycipitaceae	Cordyceps	Cordyceps javanica
1	cellular organisms	Eukaryota	Opisthokonta	Fungi	Dikarya	Ascomycota	saccharomyceta	Pezizomycotina	leotiomyceta	Eurotiomycetes	Eurotiomycetidae	Onygenales	Ajellomycetaceae	Blastomyces	Blastomyces percursus
1	cellular organisms	Eukaryota	Opisthokonta	Fungi	Dikarya	Ascomycota	saccharomyceta	Pezizomycotina	leotiomyceta	sordariomyceta	Sordariomycetes	Sordariomycetidae	Diaporthales	Gnomoniaceae	Ophiognomonia	Ophiognomonia clavigignenti-juglandacearum
2	cellular organisms	Eukaryota	Opisthokonta	Fungi	Dikarya	Ascomycota	saccharomyceta	Pezizomycotina	leotiomyceta	sordariomyceta	Sordariomycetes	Sordariomycetidae	Coniochaetales	Coniochaetaceae	Coniochaeta	Coniochaeta ligniaria	Coniochaeta ligniaria NRRL 30616
1	cellular organisms	Eukaryota	Opisthokonta	Fungi	Dikarya	Basidiomycota	Agaricomycotina	Tremellomycetes	Tremellales	Cryptococcaceae	Cryptococcus	Cryptococcus gattii species complex	Cryptococcus gattii VGII	Cryptococcus gattii VGII CA1014
1	cellular organisms	Eukaryota	Opisthokonta	Fungi	Dikarya	Ascomycota	saccharomyceta	Saccharomycotina	Saccharomycetes	Saccharomycetales	Saccharomycetales incertae sedis	Nadsonia	Nadsonia fulvescens	Nadsonia fulvescens var. elongata	Nadsonia fulvescens var. elongata DSM 6958
1	cellular organisms	Eukaryota	Opisthokonta	Fungi	Fungi incertae sedis	Microsporidia	Tubulinosematoidea	Tubulinosematidae	Anncaliia	Anncaliia algerae	Anncaliia algerae PRA339
1	cellular organisms	Eukaryota	Opisthokonta	Fungi	Dikarya	Basidiomycota	Pucciniomycotina	Cystobasidiomycetes	Cystobasidiales	Cystobasidiaceae	Cystobasidium	Cystobasidium minutum
1	cellular organisms	Eukaryota	Opisthokonta	Fungi	Dikarya	Ascomycota	saccharomyceta	Pezizomycotina	leotiomyceta	sordariomyceta	Sordariomycetes	Hypocreomycetidae	Hypocreales	Nectriaceae	Fusarium	Fusarium sambucinum species complex	Fusarium culmorum
1	cellular organisms	Eukaryota	Opisthokonta	Fungi	Dikarya	Ascomycota	saccharomyceta	Saccharomycotina	Saccharomycetes	Saccharomycetales	Saccharomycetaceae	Naumovozyma	Naumovozyma dairenensis	Naumovozyma dairenensis CBS 421
1	cellular organisms	Eukaryota	Opisthokonta	Fungi	Dikarya	Ascomycota	saccharomyceta	Pezizomycotina	leotiomyceta	Eurotiomycetes	Eurotiomycetidae	Eurotiales	Aspergillaceae	Penicillium	Penicillium roqueforti	Penicillium roqueforti FM164
1	cellular organisms	Eukaryota	Opisthokonta	Fungi	Dikarya	Ascomycota	saccharomyceta	Pezizomycotina	leotiomyceta	dothideomyceta	Dothideomycetes	Dothideomycetidae	Myriangiales	Elsinoaceae
1	cellular organisms	Eukaryota	Opisthokonta	Fungi	Dikarya	Ascomycota	saccharomyceta	Pezizomycotina	leotiomyceta	Eurotiomycetes	Eurotiomycetidae	Onygenales	Arthrodermataceae	Trichophyton	Trichophyton benhamiae	Trichophyton benhamiae CBS 112371
3	cellular organisms	Eukaryota	Opisthokonta	Fungi	Dikarya	Basidiomycota	Ustilaginomycotina	Malasseziomycetes	Malasseziales	Malasseziaceae	Malassezia
1	cellular organisms	Eukaryota	Opisthokonta	Fungi	Dikarya	Ascomycota	saccharomyceta	Pezizomycotina	leotiomyceta	sordariomyceta	Sordariomycetes	Hypocreomycetidae	Glomerellales	Plectosphaerellaceae	Verticillium	Verticillium albo-atrum
1	cellular organisms	Eukaryota	Opisthokonta	Fungi	Dikarya	Ascomycota	saccharomyceta	Pezizomycotina	leotiomyceta	dothideomyceta	Dothideomycetes	Dothideomycetidae	Mycosphaerellales	Mycosphaerellaceae	Pseudocercospora	Pseudocercospora eumusae
2	cellular organisms	Eukaryota	Opisthokonta	Fungi	Dikarya	Basidiomycota	Pucciniomycotina	Microbotryomycetes	Microbotryales	Microbotryaceae	Microbotryum	Microbotryum silenes-dioicae
2	cellular organisms	Eukaryota	Opisthokonta	Fungi	Dikarya	Ascomycota	saccharomyceta	Pezizomycotina	leotiomyceta	sordariomyceta	Sordariomycetes	Sordariomycetidae	Magnaporthales	Pyriculariaceae	Pyricularia
2	cellular organisms	Eukaryota	Opisthokonta	Fungi	Dikarya	Ascomycota	saccharomyceta	Pezizomycotina	leotiomyceta	Eurotiomycetes	Eurotiomycetidae	Eurotiales	Aspergillaceae	Aspergillus	Aspergillus turcosus
1	cellular organisms	Eukaryota	Opisthokonta	Fungi	Dikarya	Basidiomycota	Ustilaginomycotina	Exobasidiomycetes	Ceraceosorales	Ceraceosoraceae	Ceraceosorus	Ceraceosorus bombacis
3	cellular organisms	Eukaryota	Opisthokonta	Fungi	Dikarya	Ascomycota	saccharomyceta	Pezizomycotina	leotiomyceta	Eurotiomycetes	Eurotiomycetidae	Eurotiales	Aspergillaceae	Penicillium	Penicillium steckii
2	cellular organisms	Eukaryota	Opisthokonta	Fungi	Dikarya	Ascomycota	saccharomyceta	Pezizomycotina	leotiomyceta	dothideomyceta	Dothideomycetes	Pleosporomycetidae	Pleosporales	Pleosporineae	Pleosporaceae	Bipolaris	Bipolaris sorokiniana	Bipolaris sorokiniana ND90Pr
1	cellular organisms	Eukaryota	Opisthokonta	Fungi	Dikarya	Ascomycota	saccharomyceta	Pezizomycotina	leotiomyceta	sordariomyceta	Sordariomycetes	Hypocreomycetidae	Glomerellales	Glomerellaceae	Colletotrichum	Colletotrichum destructivum species complex
2	cellular organisms	Eukaryota	Opisthokonta	Fungi	Dikarya	Basidiomycota	Agaricomycotina	Tremellomycetes	Tremellales	Cryptococcaceae	Cryptococcus	Cryptococcus neoformans species complex	Cryptococcus neoformans	Cryptococcus neoformans var. neoformans	Cryptococcus neoformans var. neoformans JEC21
1	cellular organisms	Eukaryota	Opisthokonta	Fungi	Dikarya	Basidiomycota	Agaricomycotina	Tremellomycetes	Tremellales	Tremellaceae	Tremella
1	cellular organisms	Eukaryota	Opisthokonta	Fungi	Dikarya	Ascomycota	saccharomyceta	Pezizomycotina	leotiomyceta	sordariomyceta	Sordariomycetes	Hypocreomycetidae	Hypocreales	Nectriaceae	Fusarium	Fusarium fujikuroi species complex	Fusarium verticillioides	Fusarium verticillioides 7600
1	cellular organisms	Eukaryota	Opisthokonta	Fungi	Dikarya	Basidiomycota	Ustilaginomycotina	Ustilaginomycetes	Ustilaginales	Ustilaginaceae	Ustilago	Ustilago hordei
2	cellular organisms	Eukaryota	Opisthokonta	Fungi	Dikarya	Ascomycota	saccharomyceta	Pezizomycotina	leotiomyceta	sordariomyceta	Leotiomycetes	Helotiales	Dermateaceae
2	cellular organisms	Eukaryota	Opisthokonta	Fungi	Dikarya	Basidiomycota	Agaricomycotina	Tremellomycetes	Tremellales	Cryptococcaceae	Cryptococcus	Cryptococcus amylolentus	Cryptococcus amylolentus CBS 6273
3	cellular organisms	Eukaryota	Opisthokonta	Fungi	Fungi incertae sedis	Microsporidia	Apansporoblastina	Enterocytozoonidae	Enterocytozoon	Enterocytozoon hepatopenaei
1	cellular organisms	Eukaryota	Opisthokonta	Fungi	Dikarya	Basidiomycota	Ustilaginomycotina	Ustilaginomycetes	Ustilaginales	Ustilaginaceae	Ustilago	Ustilago maydis	Ustilago maydis 521
2	cellular organisms	Eukaryota	Opisthokonta	Fungi	Dikarya	Ascomycota	saccharomyceta	Pezizomycotina	leotiomyceta	sordariomyceta	Sordariomycetes	Xylariomycetidae	Xylariales	Xylariaceae	Xylaria	Xylaria flabelliformis
1	cellular organisms	Eukaryota	Opisthokonta	Fungi	Dikarya	Ascomycota	saccharomyceta	Pezizomycotina	leotiomyceta	sordariomyceta	Sordariomycetes	Xylariomycetidae	Xylariales	Sporocadaceae	Pestalotiopsis	Pestalotiopsis fici
1	cellular organisms	Eukaryota	Opisthokonta	Fungi	Dikarya	Ascomycota	saccharomyceta	Pezizomycotina	leotiomyceta	sordariomyceta	Leotiomycetes	Thelebolales	Thelebolaceae	Antarctomyces	Antarctomyces pellizariae
1	cellular organisms	Eukaryota	Opisthokonta	Fungi	Dikarya	Ascomycota	saccharomyceta	Pezizomycotina	Orbiliomycetes	Orbiliales	Orbiliaceae	Dactylellina	Dactylellina haptotyla	Dactylellina haptotyla CBS 200.50
2	cellular organisms	Eukaryota	Opisthokonta	Fungi	Fungi incertae sedis	Chytridiomycota	Chytridiomycota incertae sedis	Chytridiomycetes	Rhizophydiales	Rhizophydiales incertae sedis	Batrachochytrium	Batrachochytrium dendrobatidis	Batrachochytrium dendrobatidis JEL423
1	cellular organisms	Eukaryota	Opisthokonta	Fungi	Dikarya	Ascomycota	saccharomyceta	Pezizomycotina	leotiomyceta	sordariomyceta	Sordariomycetes	Hypocreomycetidae	Hypocreales	Clavicipitaceae	Metarhizium	Metarhizium album	Metarhizium album ARSEF 1941
2	cellular organisms	Eukaryota	Opisthokonta	Fungi	Dikarya	Ascomycota	saccharomyceta	Pezizomycotina	leotiomyceta	sordariomyceta	Sordariomycetes	Xylariomycetidae	Xylariales	Xylariaceae	Xylaria	Xylaria multiplex
1	cellular organisms	Eukaryota	Opisthokonta	Fungi	Dikarya	Basidiomycota	Agaricomycotina	Agaricomycetes	Agaricomycetidae	Boletales	Suillineae	Rhizopogonaceae	Rhizopogon
2	cellular organisms	Eukaryota	Opisthokonta	Fungi	Dikarya	Ascomycota	saccharomyceta	Pezizomycotina	leotiomyceta	Eurotiomycetes	Eurotiomycetidae	Onygenales	Onygenaceae	Uncinocarpus	Uncinocarpus reesii	Uncinocarpus reesii 1704
1	cellular organisms	Eukaryota	Opisthokonta	Fungi	Dikarya	Ascomycota	saccharomyceta	Pezizomycotina	leotiomyceta	Eurotiomycetes	Eurotiomycetidae	Eurotiales	Aspergillaceae	Penicillium	Penicillium vulpinum
1	cellular organisms	Eukaryota	Opisthokonta	Fungi	Dikarya	Ascomycota	saccharomyceta	Pezizomycotina	leotiomyceta	Eurotiomycetes	Chaetothyriomycetidae	Chaetothyriales	Herpotrichiellaceae	Cladophialophora	Cladophialophora bantiana	Cladophialophora bantiana CBS 173.52
1	cellular organisms	Eukaryota	Opisthokonta	Fungi	Dikarya	Ascomycota	saccharomyceta	Pezizomycotina	leotiomyceta	Eurotiomycetes	Eurotiomycetidae	Eurotiales	Trichocomaceae	Talaromyces	Talaromyces islandicus
2	cellular organisms	Eukaryota	Opisthokonta	Fungi	Dikarya	Ascomycota	saccharomyceta	Pezizomycotina	leotiomyceta	dothideomyceta	Dothideomycetes	Pleosporomycetidae	Pleosporales	Pleosporineae	Pleosporaceae	Pyrenophora	Pyrenophora teres	Pyrenophora teres f. maculata
1	cellular organisms	Eukaryota	Opisthokonta	Fungi	Dikarya	Ascomycota	saccharomyceta	Pezizomycotina	leotiomyceta	dothideomyceta	Dothideomycetes	Pleosporomycetidae	Pleosporales	Pleosporineae	Pleosporaceae	Stemphylium
4	cellular organisms	Eukaryota	Opisthokonta	Fungi	Dikarya	Basidiomycota	Pucciniomycotina	Microbotryomycetes	Leucosporidiales	Leucosporidiaceae	Leucosporidium	Leucosporidium scottii
1	cellular organisms	Eukaryota	Opisthokonta	Fungi	Dikarya	Ascomycota	saccharomyceta	Pezizomycotina	Orbiliomycetes	Orbiliales	Orbiliaceae	Dactylella	unclassified Dactylella	Dactylella sp.
1	cellular organisms	Eukaryota	Opisthokonta	Fungi	Dikarya	Ascomycota	Taphrinomycotina	Pneumocystidomycetes	Pneumocystidales	Pneumocystidaceae	Pneumocystis
1	cellular organisms	Eukaryota	Opisthokonta	Fungi	Dikarya	Ascomycota	saccharomyceta	Pezizomycotina	leotiomyceta	Eurotiomycetes
2	cellular organisms	Eukaryota	Opisthokonta	Fungi	Dikarya	Ascomycota	saccharomyceta	Pezizomycotina	leotiomyceta	sordariomyceta	Leotiomycetes	Helotiales	Helotiales incertae sedis	Rhynchosporium	Rhynchosporium commune
7	cellular organisms	Eukaryota	Opisthokonta	Fungi	Dikarya	Ascomycota	saccharomyceta	Pezizomycotina	leotiomyceta	sordariomyceta	Sordariomycetes
1	cellular organisms	Eukaryota	Opisthokonta	Fungi	Dikarya	Ascomycota	saccharomyceta	Saccharomycotina	Saccharomycetes	Saccharomycetales	Saccharomycetaceae	Lachancea	Lachancea dasiensis	Lachancea dasiensis CBS 10888
1	cellular organisms	Eukaryota	Opisthokonta	Fungi	Dikarya	Ascomycota	saccharomyceta	Pezizomycotina	leotiomyceta	sordariomyceta	Leotiomycetes	Leotiomycetes incertae sedis	Pseudeurotiaceae	Pseudogymnoascus	unclassified Pseudogymnoascus	Pseudogymnoascus sp. 03VT05
1	cellular organisms	Eukaryota	Opisthokonta	Fungi	Dikarya	Ascomycota	saccharomyceta	Pezizomycotina	leotiomyceta	sordariomyceta	Sordariomycetes	Hypocreomycetidae	Hypocreales	Ophiocordycipitaceae	Tolypocladium	Tolypocladium ophioglossoides	Tolypocladium ophioglossoides CBS 100239
1	cellular organisms	Eukaryota	Opisthokonta	Fungi	Dikarya	Ascomycota	saccharomyceta	Saccharomycotina	Saccharomycetes	Saccharomycetales	Saccharomycetaceae	Saccharomyces	Saccharomyces cerevisiae	Saccharomyces cerevisiae Vin13
1	cellular organisms	Eukaryota	Opisthokonta	Fungi	Dikarya	Ascomycota	saccharomyceta	Pezizomycotina	leotiomyceta	sordariomyceta	Sordariomycetes	Sordariomycetidae	Magnaporthales	Pyriculariaceae	Pyricularia	Pyricularia oryzae	Pyricularia oryzae 70-15
3	cellular organisms	Eukaryota	Opisthokonta	Fungi	Dikarya	Ascomycota	saccharomyceta	Pezizomycotina	leotiomyceta	sordariomyceta	Leotiomycetes	Helotiales	Lachnaceae	Lachnellula	Lachnellula suecica
1	cellular organisms	Eukaryota	Opisthokonta	Fungi	Dikarya	Ascomycota	saccharomyceta	Saccharomycotina	Saccharomycetes	Saccharomycetales	Debaryomycetaceae
1	cellular organisms	Eukaryota	Opisthokonta	Fungi	Dikarya	Ascomycota	saccharomyceta	Saccharomycotina	Saccharomycetes	Saccharomycetales	Debaryomycetaceae	Candida/Lodderomyces clade	Candida	Candida tropicalis
1	cellular organisms	Eukaryota	Opisthokonta	Fungi	Dikarya	Basidiomycota	Ustilaginomycotina	Ustilaginomycetes	Ustilaginales	Ustilaginaceae	Sporisorium
1	cellular organisms	Eukaryota	Opisthokonta	Fungi	Dikarya	Ascomycota	Ascomycota incertae sedis	Staphylotrichum	Staphylotrichum coccosporum
3	cellular organisms	Eukaryota	Opisthokonta	Fungi	Fungi incertae sedis	Mucoromycota	Glomeromycotina	Glomeromycetes
3	cellular organisms	Eukaryota	Opisthokonta	Fungi	Dikarya	Basidiomycota	Agaricomycotina	Agaricomycetes	Agaricomycetes incertae sedis	Russulales	Peniophoraceae	Peniophora	unclassified Peniophora
6	cellular organisms	Eukaryota	Opisthokonta	Fungi	Dikarya	Basidiomycota	Agaricomycotina	Agaricomycetes	Agaricomycetes incertae sedis	Polyporales	Polyporaceae	Dichomitus	Dichomitus squalens
4	cellular organisms	Eukaryota	Opisthokonta	Fungi	Dikarya	Ascomycota	saccharomyceta	Pezizomycotina	leotiomyceta	Eurotiomycetes	Chaetothyriomycetidae	Chaetothyriales	unclassified Chaetothyriales
3	cellular organisms	Eukaryota	Opisthokonta	Fungi	Dikarya	Ascomycota	saccharomyceta	Pezizomycotina	leotiomyceta	Eurotiomycetes	Eurotiomycetidae	Eurotiales	Thermoascaceae	Byssochlamys	Byssochlamys spectabilis
1	cellular organisms	Eukaryota	Opisthokonta	Fungi	Fungi incertae sedis	Zoopagomycota	Kickxellomycotina
4	cellular organisms	Eukaryota	Opisthokonta	Fungi	Dikarya	Basidiomycota	Pucciniomycotina	Microbotryomycetes	Sporidiobolales	Sporidiobolaceae	Rhodotorula	Rhodotorula diobovata
2	cellular organisms	Eukaryota	Opisthokonta	Fungi	Dikarya	Ascomycota	saccharomyceta	Pezizomycotina	leotiomyceta	dothideomyceta	Dothideomycetes	Pleosporomycetidae	Pleosporales	Lindgomycetaceae	Lindgomyces	Lindgomyces ingoldianus
2	cellular organisms	Eukaryota	Opisthokonta	Fungi	Dikarya	Ascomycota	saccharomyceta	Pezizomycotina	leotiomyceta	Eurotiomycetes	Eurotiomycetidae	Eurotiales	Aspergillaceae	Aspergillus	Aspergillus subgen. Polypaecilum	Aspergillus sclerotialis
3	cellular organisms	Eukaryota	Opisthokonta	Fungi	Dikarya	Ascomycota	saccharomyceta	Pezizomycotina	leotiomyceta	sordariomyceta	Sordariomycetes	Hypocreomycetidae	Hypocreales	Cordycipitaceae	Cordyceps	unclassified Cordyceps	Cordyceps sp. RAO-2017
1	cellular organisms	Eukaryota	Opisthokonta	Fungi	Dikarya	Ascomycota	saccharomyceta	Saccharomycotina	Saccharomycetes	Saccharomycetales	Saccharomycetaceae	Kazachstania	Kazachstania saulgeensis
1	cellular organisms	Eukaryota	Opisthokonta	Fungi	Dikarya	Ascomycota	saccharomyceta	Pezizomycotina	leotiomyceta	sordariomyceta	Sordariomycetes	Xylariomycetidae	Xylariales	Xylariales incertae sedis	Monosporascus	unclassified Monosporascus
4	cellular organisms	Eukaryota	Opisthokonta	Fungi	Dikarya	Basidiomycota	Agaricomycotina	Agaricomycetes	Agaricomycetes incertae sedis	Cantharellales	Ceratobasidiaceae	Rhizoctonia	Rhizoctonia solani	Rhizoctonia solani AG-1	Rhizoctonia solani AG-1 IA
2	cellular organisms	Eukaryota	Opisthokonta	Fungi	Dikarya	Basidiomycota	Agaricomycotina	Agaricomycetes	Agaricomycetidae	Boletales	Suillineae	Suillaceae	Suillus	Suillus luteus	Suillus luteus UH-Slu-Lm8-n1
3	cellular organisms	Eukaryota	Opisthokonta	Fungi	Dikarya	Ascomycota	saccharomyceta	Saccharomycotina	Saccharomycetes	Saccharomycetales	Debaryomycetaceae	Candida/Lodderomyces clade	Candida
4	cellular organisms	Eukaryota	Opisthokonta	Fungi	Dikarya	Ascomycota	saccharomyceta	Pezizomycotina	leotiomyceta	sordariomyceta	Leotiomycetes	Helotiales	Sclerotiniaceae
2	cellular organisms	Eukaryota	Opisthokonta	Fungi	Dikarya	Ascomycota	saccharomyceta	Pezizomycotina	leotiomyceta	Eurotiomycetes	Chaetothyriomycetidae	Chaetothyriales	Herpotrichiellaceae	Cladophialophora	Cladophialophora psammophila	Cladophialophora psammophila CBS 110553
1	cellular organisms	Eukaryota	Opisthokonta	Fungi	Dikarya	Ascomycota	saccharomyceta	Pezizomycotina	leotiomyceta	Eurotiomycetes	Eurotiomycetidae	Eurotiales	Aspergillaceae	Aspergillus	Aspergillus udagawae
2	cellular organisms	Eukaryota	Opisthokonta	Fungi	Dikarya	Ascomycota	saccharomyceta	Saccharomycotina	Saccharomycetes	Saccharomycetales	Saccharomycetaceae	Zygosaccharomyces	Zygosaccharomyces rouxii
4	cellular organisms	Eukaryota	Opisthokonta	Fungi	Dikarya	Basidiomycota	Agaricomycotina	Agaricomycetes	Agaricomycetidae	Boletales	Sclerodermatineae	Pisolithaceae	Pisolithus	Pisolithus tinctorius	Pisolithus tinctorius Marx 270
1	cellular organisms	Eukaryota	Opisthokonta	Fungi	Dikarya	Ascomycota	saccharomyceta	Pezizomycotina	leotiomyceta	Eurotiomycetes	Eurotiomycetidae	Eurotiales	Aspergillaceae	Monascus	Monascus purpureus
3	cellular organisms	Eukaryota	Opisthokonta	Fungi	Dikarya	Basidiomycota	Pucciniomycotina	Pucciniomycetes	Pucciniales	Pucciniaceae	Puccinia	Puccinia striiformis
5	cellular organisms	Eukaryota	Opisthokonta	Fungi	Dikarya	Ascomycota	saccharomyceta	Pezizomycotina	leotiomyceta	dothideomyceta	Dothideomycetes	Pleosporomycetidae	Mytilinidiales	Mytilinidiaceae
3	cellular organisms	Eukaryota	Opisthokonta	Fungi	Dikarya	Basidiomycota	Ustilaginomycotina	Ustilaginomycetes	Ustilaginales	Ustilaginaceae	Moesziomyces	Moesziomyces antarcticus
1	cellular organisms	Eukaryota	Opisthokonta	Fungi	Dikarya	Ascomycota	saccharomyceta	Pezizomycotina	leotiomyceta	sordariomyceta	Sordariomycetes	Hypocreomycetidae	Hypocreales	Nectriaceae	Fusarium	Fusarium incarnatum-equiseti species complex
1	cellular organisms	Eukaryota	Opisthokonta	Fungi	Dikarya	Ascomycota	saccharomyceta	Saccharomycotina	Saccharomycetes	Saccharomycetales	Metschnikowiaceae	Clavispora	Clavispora/Candida clade
1	cellular organisms	Eukaryota	Opisthokonta	Fungi	Dikarya	Ascomycota	saccharomyceta	Pezizomycotina	leotiomyceta	dothideomyceta	Dothideomycetes	Pleosporomycetidae	Pleosporales	Pleosporineae	Cucurbitariaceae
1	cellular organisms	Eukaryota	Opisthokonta	Fungi	Dikarya	Basidiomycota	Ustilaginomycotina	Malasseziomycetes	Malasseziales	Malasseziaceae	Malassezia	Malassezia restricta	Malassezia restricta CBS 7877
1	cellular organisms	Eukaryota	Opisthokonta	Fungi	Dikarya	Ascomycota	saccharomyceta	Pezizomycotina	leotiomyceta	sordariomyceta	Sordariomycetes	Hypocreomycetidae	Hypocreales	Nectriaceae	Fusarium	Fusarium solani species complex	Fusarium sp. AF-8
1	cellular organisms	Eukaryota	Opisthokonta	Fungi	Dikarya	Ascomycota	saccharomyceta	Pezizomycotina	leotiomyceta	sordariomyceta	Sordariomycetes	Hypocreomycetidae	Hypocreales	Hypocreaceae	Trichoderma	Trichoderma harzianum
2	cellular organisms	Eukaryota	Opisthokonta	Fungi	Fungi incertae sedis	Zoopagomycota	Kickxellomycotina	Harpellomycetes	Harpellales	Legeriomycetaceae	Smittium	Smittium culicis
1	cellular organisms	Eukaryota	Opisthokonta	Fungi	Dikarya	Ascomycota	saccharomyceta	Pezizomycotina	leotiomyceta	Eurotiomycetes	Eurotiomycetidae	Eurotiales	Aspergillaceae	Aspergillus	Aspergillus subgen. Circumdati	Aspergillus aculeatus	Aspergillus aculeatus ATCC 16872
1	cellular organisms	Eukaryota	Opisthokonta	Fungi	Fungi incertae sedis	Chytridiomycota	Chytridiomycota incertae sedis	Chytridiomycetes	Spizellomycetales	Spizellomycetaceae	Spizellomyces	unclassified Spizellomyces	Spizellomyces sp. 'palustris'
1	cellular organisms	Eukaryota	Opisthokonta	Fungi	Dikarya	Basidiomycota	Ustilaginomycotina	Ustilaginomycetes	Ustilaginales	Ustilaginaceae	Sporisorium	Sporisorium reilianum
2	cellular organisms	Eukaryota	Opisthokonta	Fungi	Dikarya	Basidiomycota	Agaricomycotina	Agaricomycetes	Agaricomycetes incertae sedis	Trechisporales	Hydnodontaceae	Sistotremastrum	Sistotremastrum niveocremeum	Sistotremastrum niveocremeum HHB9708
2	cellular organisms	Eukaryota	Opisthokonta	Fungi	Dikarya	Ascomycota	saccharomyceta	Pezizomycotina	leotiomyceta	Eurotiomycetes	Eurotiomycetidae	Onygenales	Ajellomycetaceae	Blastomyces	Blastomyces parvus
1	cellular organisms	Eukaryota	Opisthokonta	Fungi	Dikarya	Ascomycota	saccharomyceta	Pezizomycotina	leotiomyceta	Eurotiomycetes	Eurotiomycetidae	Eurotiales	Aspergillaceae	Aspergillus	Aspergillus subgen. Circumdati	Aspergillus niger	Aspergillus niger ATCC 1015
1	cellular organisms	Eukaryota	Opisthokonta	Fungi	Dikarya	Ascomycota	saccharomyceta	Pezizomycotina	leotiomyceta	sordariomyceta	Sordariomycetes	Hypocreomycetidae	Microascales	Ceratocystidaceae
4	cellular organisms	Eukaryota	Opisthokonta	Fungi	Dikarya	Basidiomycota	Ustilaginomycotina	Malasseziomycetes	Malasseziales	Malasseziaceae	Malassezia	Malassezia globosa	Malassezia globosa CBS 7966
1	cellular organisms	Eukaryota	Opisthokonta	Fungi	Fungi incertae sedis	Microsporidia	Pansporoblastina	Dubosqiidae	Hamiltosporidium	Hamiltosporidium magnivora
2	cellular organisms	Eukaryota	Opisthokonta	Fungi	Dikarya	Ascomycota	saccharomyceta	Pezizomycotina	leotiomyceta	sordariomyceta	Sordariomycetes	Hypocreomycetidae	Hypocreales	Ophiocordycipitaceae	Ophiocordyceps	Ophiocordyceps camponoti-rufipedis
1	cellular organisms	Eukaryota	Opisthokonta	Fungi	Dikarya	Ascomycota	saccharomyceta	Pezizomycotina	leotiomyceta	sordariomyceta	Leotiomycetes	Leotiomycetes incertae sedis	Pseudeurotiaceae	Pseudogymnoascus	Pseudogymnoascus destructans
1	cellular organisms	Eukaryota	Opisthokonta	Fungi	Dikarya	Ascomycota	saccharomyceta	Pezizomycotina	leotiomyceta	Eurotiomycetes	Eurotiomycetidae	Eurotiales	Aspergillaceae	Aspergillus	Aspergillus homomorphus	Aspergillus homomorphus CBS 101889
1	cellular organisms	Eukaryota	Opisthokonta	Fungi	Dikarya	Ascomycota	saccharomyceta	Pezizomycotina	Orbiliomycetes	Orbiliales	Orbiliaceae	Arthrobotrys	Arthrobotrys flagrans
3	cellular organisms	Eukaryota	Opisthokonta	Fungi	Dikarya	Ascomycota	saccharomyceta	Saccharomycotina	Saccharomycetes	Saccharomycetales	Trichomonascaceae	Wickerhamiella	Wickerhamiella sorbophila
4	cellular organisms	Eukaryota	Opisthokonta	Fungi	Dikarya	Ascomycota	saccharomyceta	Pezizomycotina	leotiomyceta	dothideomyceta	Dothideomycetes	Pleosporomycetidae	Aulographales	Rhizodiscinaceae	Rhizodiscina	Rhizodiscina lignyota
1	cellular organisms	Eukaryota	Opisthokonta	Fungi	Dikarya	Basidiomycota	Agaricomycotina	Agaricomycetes	Agaricomycetidae	Agaricales	Nidulariaceae	Cyathus	Cyathus stercoreus
5	cellular organisms	Eukaryota	Opisthokonta	Fungi	Dikarya	Ascomycota	saccharomyceta	Pezizomycotina	leotiomyceta	dothideomyceta	Dothideomycetes	Pleosporomycetidae	Pleosporales	Lophiostomataceae	Lophiostoma	Lophiostoma macrostomum	Lophiostoma macrostomum CBS 122681
1	cellular organisms	Eukaryota	Opisthokonta	Fungi	Dikarya	Ascomycota	saccharomyceta	Pezizomycotina	leotiomyceta	sordariomyceta	Leotiomycetes	Leotiomycetes incertae sedis	Pseudeurotiaceae	Pseudogymnoascus	unclassified Pseudogymnoascus	Pseudogymnoascus sp. 05NY08
7	cellular organisms	Eukaryota	Opisthokonta	Fungi	Dikarya	Ascomycota	saccharomyceta	Pezizomycotina	leotiomyceta	sordariomyceta	Sordariomycetes	Hypocreomycetidae	Hypocreales	Nectriaceae	Fusarium	Fusarium solani species complex
1	cellular organisms	Eukaryota	Opisthokonta	Fungi	Dikarya	Ascomycota	saccharomyceta	Pezizomycotina	leotiomyceta	sordariomyceta	Sordariomycetes	Xylariomycetidae	Xylariales
1	cellular organisms	Eukaryota	Opisthokonta	Fungi	Dikarya	Ascomycota	saccharomyceta	Pezizomycotina	leotiomyceta	Eurotiomycetes	Eurotiomycetidae	Eurotiales	Trichocomaceae	Rasamsonia	Rasamsonia emersonii	Rasamsonia emersonii CBS 393.64
3	cellular organisms	Eukaryota	Opisthokonta	Fungi	Fungi incertae sedis	Mucoromycota	Mortierellomycotina	Mortierellomycetes	Mortierellales	Mortierellaceae	Mortierella
2	cellular organisms	Eukaryota	Opisthokonta	Fungi	Dikarya	Ascomycota	saccharomyceta	Saccharomycotina	Saccharomycetes	Saccharomycetales	Saccharomycodaceae	Hanseniaspora
2	cellular organisms	Eukaryota	Opisthokonta	Fungi	Fungi incertae sedis	Zoopagomycota	Kickxellomycotina	Harpellomycetes	Harpellales	Legeriomycetaceae	Smittium	Smittium simulii
2	cellular organisms	Eukaryota	Opisthokonta	Fungi	Dikarya	Ascomycota	saccharomyceta	Saccharomycotina	Saccharomycetes	Saccharomycetales	Pichiaceae	Pichia	Pichia membranifaciens
2	cellular organisms	Eukaryota	Opisthokonta	Fungi	Dikarya	Basidiomycota	Ustilaginomycotina	Exobasidiomycetes	Tilletiales	Tilletiaceae	Tilletia	Tilletia indica
2	cellular organisms	Eukaryota	Opisthokonta	Fungi	Dikarya	Ascomycota	saccharomyceta	Saccharomycotina	Saccharomycetes	Saccharomycetales	Saccharomycetaceae	Eremothecium	Eremothecium sinecaudum
2	cellular organisms	Eukaryota	Opisthokonta	Fungi	Dikarya	Ascomycota	saccharomyceta	Pezizomycotina	leotiomyceta	sordariomyceta	Sordariomycetes	Hypocreomycetidae	Hypocreales	Cordycipitaceae	Cordyceps
4	cellular organisms	Eukaryota	Opisthokonta	Fungi	Dikarya	Basidiomycota	Agaricomycotina	Agaricomycetes	Agaricomycetes incertae sedis	Polyporales	Fomitopsidaceae
1	cellular organisms	Eukaryota	Opisthokonta	Fungi	Dikarya	Ascomycota	saccharomyceta	Pezizomycotina	leotiomyceta	sordariomyceta	Sordariomycetes	Hypocreomycetidae	Hypocreales	Clavicipitaceae	Metarhizium	Metarhizium guizhouense	Metarhizium guizhouense ARSEF 977
2	cellular organisms	Eukaryota	Opisthokonta	Fungi	Dikarya	Ascomycota	saccharomyceta	Pezizomycotina	leotiomyceta	sordariomyceta	Sordariomycetes	Sordariomycetidae	Diaporthales
2	cellular organisms	Eukaryota	Opisthokonta	Fungi	Fungi incertae sedis	Chytridiomycota	Chytridiomycota incertae sedis	Chytridiomycetes	Rhizophydiales	Rhizophydiales incertae sedis	Batrachochytrium
1	cellular organisms	Eukaryota	Opisthokonta	Fungi	Dikarya	Ascomycota	saccharomyceta	Pezizomycotina	leotiomyceta	dothideomyceta	Dothideomycetes	Dothideomycetes incertae sedis	Botryosphaeriales	Botryosphaeriaceae	Diplodia
1	cellular organisms	Eukaryota	Opisthokonta	Fungi	Dikarya	Ascomycota	saccharomyceta	Pezizomycotina	leotiomyceta	Eurotiomycetes	Eurotiomycetidae	Eurotiales	Aspergillaceae	Aspergillus	Aspergillus subgen. Circumdati	Aspergillus flavus
2	cellular organisms	Eukaryota	Opisthokonta	Fungi	Dikarya	Basidiomycota	Agaricomycotina	Agaricomycetes	Agaricomycetidae	Agaricales	Agaricaceae	Agaricus	Agaricus bisporus	Agaricus bisporus var. bisporus	Agaricus bisporus var. bisporus H97
2	cellular organisms	Eukaryota	Opisthokonta	Fungi	Dikarya	Ascomycota	saccharomyceta	Pezizomycotina	leotiomyceta	sordariomyceta	Sordariomycetes	Sordariomycetidae	Diaporthales	Diaporthaceae	Diaporthe
1	cellular organisms	Eukaryota	Opisthokonta	Fungi	Dikarya	Ascomycota	saccharomyceta	Pezizomycotina	leotiomyceta	Eurotiomycetes	Eurotiomycetidae	Eurotiales	Trichocomaceae	Talaromyces	Talaromyces amestolkiae
5	cellular organisms	Eukaryota	Opisthokonta	Fungi	Dikarya	Ascomycota	saccharomyceta	Pezizomycotina	Pezizomycetes	Pezizales	Ascodesmidaceae	Ascodesmis	Ascodesmis nigricans
6	cellular organisms	Eukaryota	Opisthokonta	Fungi	Dikarya	Basidiomycota	Agaricomycotina	Agaricomycetes	Agaricomycetidae	Agaricales	Strophariaceae	Hypholoma	Hypholoma sublateritium	Hypholoma sublateritium FD-334 SS-4
2	cellular organisms	Eukaryota	Opisthokonta	Fungi	Dikarya	Ascomycota	saccharomyceta	Pezizomycotina	leotiomyceta	sordariomyceta	Sordariomycetes	Sordariomycetidae	Diaporthales	Valsaceae
6	cellular organisms	Eukaryota	Opisthokonta	Fungi	Dikarya	Basidiomycota	Agaricomycotina	Agaricomycetes	Agaricomycetes incertae sedis	Russulales	Hericiaceae	Hericium	Hericium alpestre
2	cellular organisms	Eukaryota	Opisthokonta	Fungi	Dikarya	Ascomycota	saccharomyceta	Pezizomycotina	leotiomyceta	dothideomyceta	Dothideomycetes	Dothideomycetes incertae sedis	Patellariales	Patellariaceae	Patellaria	Patellaria atrata	Patellaria atrata CBS 101060
2	cellular organisms	Eukaryota	Opisthokonta	Fungi	Dikarya	Ascomycota	saccharomyceta	Pezizomycotina	leotiomyceta	dothideomyceta	Dothideomycetes	Dothideomycetidae	Mycosphaerellales	Mycosphaerellaceae	Cercospora	Cercospora berteroae
4	cellular organisms	Eukaryota	Opisthokonta	Fungi	Dikarya	Basidiomycota	Pucciniomycotina	Microbotryomycetes	Microbotryales	Microbotryaceae	Microbotryum	Microbotryum saponariae
2	cellular organisms	Eukaryota	Opisthokonta	Fungi	Dikarya	Basidiomycota	Agaricomycotina	Agaricomycetes	Agaricomycetes incertae sedis	Cantharellales	Ceratobasidiaceae
4	cellular organisms	Eukaryota	Opisthokonta	Fungi	Dikarya	Ascomycota	saccharomyceta	Pezizomycotina	leotiomyceta	sordariomyceta	Sordariomycetes	Xylariomycetidae	Xylariales	Hypoxylaceae	Daldinia	unclassified Daldinia	Daldinia sp. EC12
2	cellular organisms	Eukaryota	Opisthokonta	Fungi	Dikarya	Basidiomycota	Agaricomycotina	Agaricomycetes	Agaricomycetidae	Agaricales	Marasmiaceae	Moniliophthora
5	cellular organisms	Eukaryota	Opisthokonta	Fungi	Dikarya	Ascomycota	saccharomyceta	Pezizomycotina	leotiomyceta	dothideomyceta	Dothideomycetes	Pleosporomycetidae	Pleosporales	Pleosporineae	Pleosporaceae	Pyrenophora	Pyrenophora teres
2	cellular organisms	Eukaryota	Opisthokonta	Fungi	Dikarya	Ascomycota	saccharomyceta	Pezizomycotina	leotiomyceta	sordariomyceta	Sordariomycetes	Hypocreomycetidae	Microascales	Ceratocystidaceae	Ceratocystis	Ceratocystis fimbriata	Ceratocystis fimbriata CBS 114723
3	cellular organisms	Eukaryota	Opisthokonta	Fungi	Dikarya	Ascomycota	saccharomyceta	Pezizomycotina	leotiomyceta	sordariomyceta	Sordariomycetes	Hypocreomycetidae	Microascales	Ceratocystidaceae	Ceratocystis
1	cellular organisms	Eukaryota	Opisthokonta	Fungi	Dikarya	Ascomycota	saccharomyceta	Pezizomycotina	leotiomyceta	sordariomyceta	Sordariomycetes	Hypocreomycetidae	Hypocreales	Hypocreaceae	Trichoderma	Trichoderma atroviride
1	cellular organisms	Eukaryota	Opisthokonta	Fungi	Dikarya	Ascomycota	saccharomyceta	Saccharomycotina	Saccharomycetes	Saccharomycetales	Saccharomycetaceae	Tetrapisispora	Tetrapisispora phaffii	Tetrapisispora phaffii CBS 4417
6	cellular organisms	Eukaryota	Opisthokonta	Fungi	Dikarya	Basidiomycota	Agaricomycotina	Agaricomycetes	Agaricomycetes incertae sedis	Hymenochaetales	Hymenochaetaceae	Fomitiporia	Fomitiporia mediterranea	Fomitiporia mediterranea MF3/22
1	cellular organisms	Eukaryota	Opisthokonta	Fungi	Dikarya	Ascomycota	saccharomyceta	Pezizomycotina	leotiomyceta	Eurotiomycetes	Eurotiomycetidae	Eurotiales	Aspergillaceae	Aspergillus	Aspergillus brunneoviolaceus	Aspergillus brunneoviolaceus CBS 621.78
3	cellular organisms	Eukaryota	Opisthokonta	Fungi	Dikarya	Ascomycota	saccharomyceta	Pezizomycotina	leotiomyceta	Eurotiomycetes	Eurotiomycetidae	Onygenales	Onygenales incertae sedis	Coccidioides
2	cellular organisms	Eukaryota	Opisthokonta	Fungi	Dikarya	Ascomycota	saccharomyceta	Pezizomycotina	leotiomyceta	sordariomyceta	Sordariomycetes	Xylariomycetidae	Xylariales	Xylariales incertae sedis	Monosporascus	Monosporascus ibericus
1	cellular organisms	Eukaryota	Opisthokonta	Fungi	Dikarya	Ascomycota	saccharomyceta	Pezizomycotina	leotiomyceta	sordariomyceta	Leotiomycetes	Helotiales	Sclerotiniaceae	Sclerotinia	Sclerotinia sclerotiorum	Sclerotinia sclerotiorum 1980 UF-70
4	cellular organisms	Eukaryota	Opisthokonta	Fungi	Dikarya	Ascomycota	saccharomyceta	Pezizomycotina	leotiomyceta	sordariomyceta	Sordariomycetes	Hypocreomycetidae	Hypocreales	Ophiocordycipitaceae	Drechmeria	Drechmeria coniospora
1	cellular organisms	Eukaryota	Opisthokonta	Fungi	Dikarya	Basidiomycota	Pucciniomycotina	Agaricostilbomycetes	Agaricostilbales	Kondoaceae	Kondoa	Kondoa thailandica
3	cellular organisms	Eukaryota	Opisthokonta	Fungi	Dikarya	Ascomycota	saccharomyceta	Pezizomycotina	leotiomyceta	sordariomyceta	Leotiomycetes	Helotiales	Helotiales incertae sedis	Chalara	Chalara longipes	Chalara longipes BDJ
3	cellular organisms	Eukaryota	Opisthokonta	Fungi	Dikarya	Basidiomycota	Agaricomycotina	Tremellomycetes	Tremellales	Bulleribasidiaceae	Hannaella	Hannaella oryzae
3	cellular organisms	Eukaryota	Opisthokonta	Fungi	Dikarya	Ascomycota	saccharomyceta	Pezizomycotina	leotiomyceta	Eurotiomycetes	Eurotiomycetidae	Eurotiales	Aspergillaceae	Penicillium	Penicillium chrysogenum species complex
1	cellular organisms	Eukaryota	Opisthokonta	Fungi	Dikarya	Ascomycota	saccharomyceta	Pezizomycotina	leotiomyceta	Eurotiomycetes	Eurotiomycetidae	Eurotiales	Aspergillaceae	Penicillium	Penicillium solitum
1	cellular organisms	Eukaryota	Opisthokonta	Fungi	Dikarya	Ascomycota	saccharomyceta	Pezizomycotina	leotiomyceta	sordariomyceta	Sordariomycetes	Hypocreomycetidae	Hypocreales	Nectriaceae	Fusarium	Fusarium sambucinum species complex	Fusarium graminearum	Fusarium graminearum PH-1
4	cellular organisms	Eukaryota	Opisthokonta	Fungi	Dikarya	Ascomycota	saccharomyceta	Pezizomycotina	leotiomyceta	dothideomyceta	Dothideomycetes	Pleosporomycetidae	Venturiales	Sympoventuriaceae	Verruconis	Verruconis gallopava
3	cellular organisms	Eukaryota	Opisthokonta	Fungi	Dikarya	Basidiomycota	Agaricomycotina	Agaricomycetes	Agaricomycetidae	Boletales	Paxilineae	Paxillaceae	Paxillus
1	cellular organisms	Eukaryota	Opisthokonta	Fungi	Dikarya	Ascomycota	saccharomyceta	Pezizomycotina	leotiomyceta	Eurotiomycetes	Chaetothyriomycetidae	Chaetothyriales	Herpotrichiellaceae	Fonsecaea	Fonsecaea multimorphosa
3	cellular organisms	Eukaryota	Opisthokonta	Fungi	Dikarya	Ascomycota	saccharomyceta	Pezizomycotina	leotiomyceta	sordariomyceta	Leotiomycetes	Helotiales	Dermateaceae	Marssonina	Marssonina coronariae
3	cellular organisms	Eukaryota	Opisthokonta	Fungi	Dikarya	Ascomycota	saccharomyceta	Pezizomycotina	leotiomyceta	sordariomyceta	Sordariomycetes	Hypocreomycetidae	Hypocreales	Ophiocordycipitaceae	Hirsutella	Hirsutella minnesotensis	Hirsutella minnesotensis 3608
1	cellular organisms	Eukaryota	Opisthokonta	Fungi	Dikarya	Ascomycota	saccharomyceta	Pezizomycotina	leotiomyceta	Eurotiomycetes	Eurotiomycetidae	Onygenales	Onygenales incertae sedis	Paracoccidioides
1	cellular organisms	Eukaryota	Opisthokonta	Fungi	Dikarya	Ascomycota	Taphrinomycotina	Pneumocystidomycetes	Pneumocystidales	Pneumocystidaceae	Pneumocystis	Pneumocystis carinii	Pneumocystis carinii B80
3	cellular organisms	Eukaryota	Opisthokonta	Fungi	Dikarya	Ascomycota	saccharomyceta	Pezizomycotina	leotiomyceta	sordariomyceta	Sordariomycetes	Hypocreomycetidae	Microascales	Microascaceae
4	cellular organisms	Eukaryota	Opisthokonta	Fungi	Dikarya	Basidiomycota	Pucciniomycotina	Microbotryomycetes	Sporidiobolales	Sporidiobolaceae	Rhodotorula	unclassified Rhodotorula	Rhodotorula sp. JG-1b
3	cellular organisms	Eukaryota	Opisthokonta	Fungi	Dikarya	Basidiomycota	Agaricomycotina	Agaricomycetes	Agaricomycetes incertae sedis	Polyporales	Laetiporaceae	Laetiporus	Laetiporus sulphureus	Laetiporus sulphureus 93-53
1	cellular organisms	Eukaryota	Opisthokonta	Fungi	Dikarya	Ascomycota	saccharomyceta	Pezizomycotina	leotiomyceta	sordariomyceta	Leotiomycetes	Helotiales	Rutstroemiaceae	Rutstroemia	unclassified Rutstroemia	Rutstroemia sp. NJR-2017a BBW
3	cellular organisms	Eukaryota	Opisthokonta	Fungi	Dikarya	Basidiomycota	Agaricomycotina	Agaricomycetes	Agaricomycetidae	Agaricales	Tricholomataceae	Laccaria	Laccaria bicolor	Laccaria bicolor S238N-H82
2	cellular organisms	Eukaryota	Opisthokonta	Fungi	Dikarya	Ascomycota	saccharomyceta	Pezizomycotina	leotiomyceta	dothideomyceta	Dothideomycetes	Dothideomycetidae	Mycosphaerellales	Teratosphaeriaceae	Acidomyces	Acidomyces richmondensis	Acidomyces richmondensis BFW
2	cellular organisms	Eukaryota	Opisthokonta	Fungi	Dikarya	Ascomycota	saccharomyceta	Saccharomycotina	Saccharomycetes	Saccharomycetales	Saccharomycodaceae	Saccharomycodes	Saccharomycodes ludwigii
3	cellular organisms	Eukaryota	Opisthokonta	Fungi	Dikarya	Ascomycota	saccharomyceta	Pezizomycotina	leotiomyceta	Eurotiomycetes	Eurotiomycetidae	Eurotiales	Aspergillaceae	Aspergillus	Aspergillus subgen. Nidulantes	Aspergillus nidulans	Aspergillus nidulans FGSC A4
4	cellular organisms	Eukaryota	Opisthokonta	Fungi	Dikarya	Basidiomycota	Ustilaginomycotina	Ustilaginomycetes	Ustilaginales	Ustilaginaceae	Ustilago	Ustilago trichophora
5	cellular organisms	Eukaryota	Opisthokonta	Fungi	Dikarya	Basidiomycota	Agaricomycotina	Agaricomycetes	Agaricomycetidae	Boletales	Sclerodermatineae	Sclerodermataceae	Scleroderma	Scleroderma citrinum	Scleroderma citrinum Foug A
3	cellular organisms	Eukaryota	Opisthokonta	Fungi	Dikarya	Basidiomycota	Agaricomycotina	Agaricomycetes	Agaricomycetidae	Agaricales	Omphalotaceae	Lentinula	Lentinula edodes
2	cellular organisms	Eukaryota	Opisthokonta	Fungi	Dikarya	Ascomycota	saccharomyceta	Pezizomycotina	leotiomyceta	sordariomyceta	Sordariomycetes	Hypocreomycetidae	Hypocreales	Ophiocordycipitaceae	Ophiocordyceps	Ophiocordyceps unilateralis
3	cellular organisms	Eukaryota	Opisthokonta	Fungi	Dikarya	Ascomycota	saccharomyceta	Pezizomycotina	leotiomyceta	sordariomyceta	Sordariomycetes	Xylariomycetidae	Xylariales	Xylariales incertae sedis	Monosporascus	unclassified Monosporascus	Monosporascus sp. 5C6A
1	cellular organisms	Eukaryota	Opisthokonta	Fungi	Dikarya	Ascomycota	saccharomyceta	Pezizomycotina	leotiomyceta	sordariomyceta	Sordariomycetes	Hypocreomycetidae	Hypocreales	Clavicipitaceae	Pochonia	Pochonia chlamydosporia	Pochonia chlamydosporia 123
5	cellular organisms	Eukaryota	Opisthokonta	Fungi	Dikarya	Ascomycota	saccharomyceta	Pezizomycotina	leotiomyceta	dothideomyceta	Dothideomycetes	Pleosporomycetidae	Pleosporales	Pleosporineae	Pleosporaceae	Pyrenophora	Pyrenophora teres	Pyrenophora teres f. teres	Pyrenophora teres f. teres 0-1
1	cellular organisms	Eukaryota	Opisthokonta	Fungi	Dikarya	Ascomycota	saccharomyceta	Pezizomycotina	leotiomyceta	sordariomyceta	Leotiomycetes	Leotiomycetes incertae sedis	Pseudeurotiaceae	Pseudogymnoascus	unclassified Pseudogymnoascus	Pseudogymnoascus sp. VKM F-4519 (FW-2642)
2	cellular organisms	Eukaryota	Opisthokonta	Fungi	Dikarya	Ascomycota	saccharomyceta	Pezizomycotina	leotiomyceta	Eurotiomycetes	Eurotiomycetidae	Eurotiales	Aspergillaceae	Penicillium	Penicillium camemberti
3	cellular organisms	Eukaryota	Opisthokonta	Fungi	Fungi incertae sedis	Mucoromycota	Mucoromycotina	Mucoromycetes	Mucorales	Mucorineae	Mucoraceae	Mucor	Mucor ambiguus
1	cellular organisms	Eukaryota	Opisthokonta	Fungi	Dikarya	Basidiomycota	Agaricomycotina	Agaricomycetes	Agaricomycetidae	Agaricales	Agaricaceae	Agaricus	Agaricus bisporus	Agaricus bisporus var. burnettii	Agaricus bisporus var. burnettii JB137-S8
1	cellular organisms	Eukaryota	Opisthokonta	Fungi	Dikarya	Ascomycota	saccharomyceta	Pezizomycotina	leotiomyceta	sordariomyceta	Sordariomycetes	Hypocreomycetidae	Hypocreales	Cordycipitaceae	Cordyceps	Cordyceps militaris
6	cellular organisms	Eukaryota	Opisthokonta	Fungi	Dikarya	Basidiomycota	Agaricomycotina	Agaricomycetes	Agaricomycetes incertae sedis	Polyporales	Polyporales incertae sedis	Fibroporia	Fibroporia radiculosa
4	cellular organisms	Eukaryota	Opisthokonta	Fungi	Fungi incertae sedis	Microsporidia	Microsporidia incertae sedis	Mitosporidium	Mitosporidium daphniae
2	cellular organisms	Eukaryota	Opisthokonta	Fungi	Dikarya	Ascomycota	saccharomyceta	Pezizomycotina	leotiomyceta	Eurotiomycetes	Chaetothyriomycetidae	Chaetothyriales	Herpotrichiellaceae	Exophiala	Exophiala sideris
1	cellular organisms	Eukaryota	Opisthokonta	Fungi	Dikarya	Ascomycota	saccharomyceta	Pezizomycotina	leotiomyceta	Eurotiomycetes	Chaetothyriomycetidae	Chaetothyriales	Herpotrichiellaceae	Capronia
1	cellular organisms	Eukaryota	Opisthokonta	Fungi	Dikarya	Ascomycota	saccharomyceta	Pezizomycotina	leotiomyceta	sordariomyceta	Sordariomycetes	Hypocreomycetidae	Glomerellales	Plectosphaerellaceae	Verticillium	Verticillium dahliae
1	cellular organisms	Eukaryota	Opisthokonta	Fungi	Dikarya	Ascomycota	saccharomyceta	Pezizomycotina	leotiomyceta	sordariomyceta	Sordariomycetes	Hypocreomycetidae	Hypocreales	Ophiocordycipitaceae	Ophiocordyceps	Ophiocordyceps polyrhachis-furcata	Ophiocordyceps polyrhachis-furcata BCC 54312
6	cellular organisms	Eukaryota	Opisthokonta	Fungi	Fungi incertae sedis	Zoopagomycota	Entomophthoromycotina	Entomophthoromycetes	Entomophthorales	Ancylistaceae	Conidiobolus	Conidiobolus coronatus	Conidiobolus coronatus NRRL 28638
3	cellular organisms	Eukaryota	Opisthokonta	Fungi	Dikarya	Ascomycota	saccharomyceta	Pezizomycotina	leotiomyceta	dothideomyceta	Dothideomycetes	Dothideomycetes incertae sedis	Botryosphaeriales	Botryosphaeriaceae	Botryosphaeria	Botryosphaeria dothidea
2	cellular organisms	Eukaryota	Opisthokonta	Fungi	Dikarya	Ascomycota	saccharomyceta	Pezizomycotina	leotiomyceta	Eurotiomycetes	Eurotiomycetidae	Eurotiales	Aspergillaceae	Penicillium	Penicillium italicum
1	cellular organisms	Eukaryota	Opisthokonta	Fungi	Dikarya	Ascomycota	saccharomyceta	Pezizomycotina	leotiomyceta	dothideomyceta	Dothideomycetes	Pleosporomycetidae	Pleosporales	Pleosporineae	Phaeosphaeriaceae	Parastagonospora	Parastagonospora nodorum
3	cellular organisms	Eukaryota	Opisthokonta	Fungi	Dikarya	Ascomycota	saccharomyceta	Pezizomycotina	leotiomyceta	sordariomyceta	Sordariomycetes	Sordariomycetidae	Diaporthales	Schizoparmaceae	Coniella	Coniella lustricola
1	cellular organisms	Eukaryota	Opisthokonta	Fungi	Dikarya	Ascomycota	saccharomyceta	Pezizomycotina	leotiomyceta	Eurotiomycetes	Eurotiomycetidae	Onygenales	Ajellomycetaceae	Blastomyces	Blastomyces silverae
6	cellular organisms	Eukaryota	Opisthokonta	Fungi	Dikarya	Basidiomycota	Wallemiomycotina	Wallemiomycetes	Wallemiales	Wallemiaceae	Wallemia	Wallemia mellicola
3	cellular organisms	Eukaryota	Opisthokonta	Fungi	Dikarya	Ascomycota	saccharomyceta	Pezizomycotina	leotiomyceta	Eurotiomycetes	Chaetothyriomycetidae	Phaeomoniellales	Phaeomoniellaceae	Phaeomoniella	Phaeomoniella chlamydospora
3	cellular organisms	Eukaryota	Opisthokonta	Fungi	Dikarya	Ascomycota	saccharomyceta	Pezizomycotina	leotiomyceta	sordariomyceta	Leotiomycetes	Helotiales	Helotiales incertae sedis	Phialocephala	Phialocephala scopiformis
1	cellular organisms	Eukaryota	Opisthokonta	Fungi	Dikarya	Ascomycota	saccharomyceta	Pezizomycotina	leotiomyceta	Eurotiomycetes	Eurotiomycetidae	Eurotiales	Aspergillaceae	Aspergillus	Aspergillus subgen. Circumdati	Aspergillus steynii	Aspergillus steynii IBT 23096
5	cellular organisms	Eukaryota	Opisthokonta	Fungi	Dikarya	Basidiomycota	Agaricomycotina	Agaricomycetes	Agaricomycetes incertae sedis	Polyporales	Polyporaceae	Lentinus	Lentinus tigrinus
2	cellular organisms	Eukaryota	Opisthokonta	Fungi	Dikarya	Ascomycota	saccharomyceta	Pezizomycotina	leotiomyceta	Eurotiomycetes	Eurotiomycetidae	Eurotiales	Trichocomaceae	Talaromyces	Talaromyces stipitatus	Talaromyces stipitatus ATCC 10500
2	cellular organisms	Eukaryota	Opisthokonta	Fungi	Dikarya	Ascomycota	saccharomyceta	Pezizomycotina	leotiomyceta	sordariomyceta	Leotiomycetes	Erysiphales	Erysiphaceae
1	cellular organisms	Eukaryota	Opisthokonta	Fungi	Dikarya	Ascomycota	saccharomyceta	Pezizomycotina	leotiomyceta	Eurotiomycetes	Eurotiomycetidae	Onygenales	Onygenales incertae sedis	Paracoccidioides	Paracoccidioides lutzii	Paracoccidioides lutzii Pb01
3	cellular organisms	Eukaryota	Opisthokonta	Fungi	Dikarya	Ascomycota	saccharomyceta	Pezizomycotina	leotiomyceta	sordariomyceta	Sordariomycetes	Hypocreomycetidae	Hypocreales	Nectriaceae	Fusarium	Fusarium oxysporum species complex	Fusarium oxysporum
5	cellular organisms	Eukaryota	Opisthokonta	Fungi	Dikarya	Basidiomycota	Ustilaginomycotina	Exobasidiomycetes	Georgefischeriales	Tilletiariaceae	Tilletiaria	Tilletiaria anomala	Tilletiaria anomala UBC 951
5	cellular organisms	Eukaryota	Opisthokonta	Fungi	Dikarya	Basidiomycota	Agaricomycotina	Agaricomycetes	Agaricomycetidae	Agaricales	Physalacriaceae	Armillaria
2	cellular organisms	Eukaryota	Opisthokonta	Fungi	Dikarya	Basidiomycota	Agaricomycotina	Agaricomycetes	Agaricomycetidae	Agaricales	Bolbitiaceae	Panaeolus	Panaeolus cyanescens
2	cellular organisms	Eukaryota	Opisthokonta	Fungi	Dikarya	Ascomycota	saccharomyceta	Pezizomycotina	leotiomyceta	dothideomyceta	Dothideomycetes	Dothideomycetidae	Myriangiales	Elsinoaceae	Elsinoe	Elsinoe australis
3	cellular organisms	Eukaryota	Opisthokonta	Fungi	Dikarya	Ascomycota	saccharomyceta	Pezizomycotina	leotiomyceta	Eurotiomycetes	Eurotiomycetidae	Eurotiales	Aspergillaceae	Aspergillus	Aspergillus subgen. Fumigati	Aspergillus clavatus	Aspergillus clavatus NRRL 1
1	cellular organisms	Eukaryota	Opisthokonta	Fungi	Dikarya	Basidiomycota	Agaricomycotina	Agaricomycetes	Agaricomycetes incertae sedis	Polyporales	Polyporaceae	Polyporus	Polyporus grammocephalus
2	cellular organisms	Eukaryota	Opisthokonta	Fungi	Dikarya	Ascomycota	saccharomyceta	Pezizomycotina	leotiomyceta	Eurotiomycetes	Eurotiomycetidae	Eurotiales	Aspergillaceae	Penicillium	Penicillium decumbens
9	cellular organisms	Eukaryota	Opisthokonta	Fungi	Fungi incertae sedis	Chytridiomycota	Chytridiomycota incertae sedis	Chytridiomycetes	Synchytriales	Synchytriaceae	Synchytrium	Synchytrium microbalum
5	cellular organisms	Eukaryota	Opisthokonta	Fungi	Dikarya	Ascomycota	saccharomyceta	Pezizomycotina	leotiomyceta	sordariomyceta	Leotiomycetes	Helotiales	Dermateaceae	Marssonina	Marssonina brunnea	Marssonina brunnea f. sp. 'multigermtubi'	Marssonina brunnea f. sp. 'multigermtubi' MB_m1
2	cellular organisms	Eukaryota	Opisthokonta	Fungi	Dikarya	Basidiomycota	Agaricomycotina	Tremellomycetes	Tremellales	Cryptococcaceae	Cryptococcus	Cryptococcus gattii species complex	Cryptococcus gattii VGIII
1	cellular organisms	Eukaryota	Opisthokonta	Fungi	Dikarya	Basidiomycota	Ustilaginomycotina	Ustilaginomycetes	Ustilaginales	Ustilaginaceae	Kalmanozyma	Kalmanozyma brasiliensis	Kalmanozyma brasiliensis GHG001
1	cellular organisms	Eukaryota	Opisthokonta	Fungi	Dikarya	Ascomycota	saccharomyceta	Pezizomycotina	leotiomyceta	Lecanoromycetes	OSLEUM clade	Lecanoromycetidae	Lecanorales	Lecanorineae	Cladoniaceae	Cladonia	Cladonia uncialis	Cladonia uncialis subsp. uncialis
5	cellular organisms	Eukaryota	Opisthokonta	Fungi	Dikarya	Basidiomycota	Agaricomycotina	Agaricomycetes	Agaricomycetes incertae sedis	Polyporales	Fomitopsidaceae	Fomitopsis	Fomitopsis rosea
12	cellular organisms	Eukaryota	Opisthokonta	Fungi	Dikarya	Basidiomycota	Agaricomycotina	Agaricomycetes	Agaricomycetidae	Agaricales	Mycenaceae	Mycena	Mycena chlorophos
4	cellular organisms	Eukaryota	Opisthokonta	Fungi	Dikarya	Ascomycota	saccharomyceta	Pezizomycotina	leotiomyceta	sordariomyceta	Leotiomycetes	Helotiales	Chlorociboriaceae	Chlorociboria	Chlorociboria aeruginascens
1	cellular organisms	Eukaryota	Opisthokonta	Fungi	Dikarya	Basidiomycota	Agaricomycotina	Agaricomycetes	Agaricomycetes incertae sedis	Cantharellales
1	cellular organisms	Eukaryota	Opisthokonta	Fungi	Dikarya	Basidiomycota	Agaricomycotina	Agaricomycetes	Agaricomycetes incertae sedis	Polyporales	Polyporaceae	Polyporus	Polyporus brumalis
1	cellular organisms	Eukaryota	Opisthokonta	Fungi	Dikarya	Ascomycota	saccharomyceta	Pezizomycotina	leotiomyceta	Eurotiomycetes	Eurotiomycetidae	Eurotiales	Aspergillaceae	Aspergillus	Aspergillus sergii
3	cellular organisms	Eukaryota	Opisthokonta	Fungi	Dikarya	Basidiomycota	Agaricomycotina	Tremellomycetes	Tremellales	Cryptococcaceae	Cryptococcus	Cryptococcus neoformans species complex	Cryptococcus neoformans	Cryptococcus neoformans var. grubii	Cryptococcus neoformans var. grubii Bt63
3	cellular organisms	Eukaryota	Opisthokonta	Fungi	Dikarya	Basidiomycota	Agaricomycotina	Dacrymycetes	Dacrymycetales	Dacrymycetaceae	Calocera
2	cellular organisms	Eukaryota	Opisthokonta	Fungi	Dikarya	Ascomycota	saccharomyceta	Pezizomycotina	leotiomyceta	sordariomyceta	Sordariomycetes	Hypocreomycetidae	Hypocreales	Hypocreaceae	Trichoderma	Trichoderma guizhouense
2	cellular organisms	Eukaryota	Opisthokonta	Fungi	Dikarya	Ascomycota	saccharomyceta	Pezizomycotina	leotiomyceta	Eurotiomycetes	Eurotiomycetidae	Eurotiales	Aspergillaceae	Aspergillus	Aspergillus ellipticus	Aspergillus ellipticus CBS 707.79
1	cellular organisms	Eukaryota	Opisthokonta	Fungi	Dikarya	Ascomycota	saccharomyceta	Pezizomycotina	leotiomyceta	sordariomyceta	Sordariomycetes	Hypocreomycetidae	Hypocreales	Nectriaceae	Fusarium	Fusarium oxysporum species complex	Fusarium oxysporum	Fusarium oxysporum f. sp. melonis	Fusarium oxysporum f. sp. melonis 26406
5	cellular organisms	Eukaryota	Opisthokonta	Fungi	Fungi incertae sedis	Chytridiomycota	Chytridiomycota incertae sedis	Chytridiomycetes	Synchytriales	Synchytriaceae	Synchytrium	Synchytrium endobioticum
1	cellular organisms	Eukaryota	Opisthokonta	Fungi	Dikarya	Ascomycota	saccharomyceta	Pezizomycotina	leotiomyceta	sordariomyceta	Sordariomycetes	Hypocreomycetidae	Glomerellales	Glomerellaceae	Colletotrichum	Colletotrichum gloeosporioides species complex	Colletotrichum gloeosporioides	Colletotrichum gloeosporioides Cg-14
2	cellular organisms	Eukaryota	Opisthokonta	Fungi	Dikarya	Ascomycota	saccharomyceta	Pezizomycotina	leotiomyceta	sordariomyceta	Leotiomycetes	Leotiomycetes incertae sedis	Pseudeurotiaceae	Pseudogymnoascus	unclassified Pseudogymnoascus	Pseudogymnoascus sp. VKM F-4281 (FW-2241)
2	cellular organisms	Eukaryota	Opisthokonta	Fungi	Dikarya	Ascomycota	saccharomyceta	Pezizomycotina	Orbiliomycetes	Orbiliales	Orbiliaceae	Dactylellina	Dactylellina cionopaga
5	cellular organisms	Eukaryota	Opisthokonta	Fungi	Fungi incertae sedis	Mucoromycota	Mucoromycotina	Endogonomycetes	Endogonales	Endogonales incertae sedis	Bifiguratus	Bifiguratus adelaidae
9	cellular organisms	Eukaryota	Opisthokonta	Fungi	Dikarya	Basidiomycota	Agaricomycotina	Tremellomycetes	Tremellales	Tremellaceae	Tremella	Tremella fuciformis
8	cellular organisms	Eukaryota	Opisthokonta	Fungi	Dikarya	Basidiomycota	Pucciniomycotina	Microbotryomycetes	Sporidiobolales	Sporidiobolaceae	Rhodotorula	Rhodotorula graminis	Rhodotorula graminis WP1
3	cellular organisms	Eukaryota	Opisthokonta	Fungi	Dikarya	Ascomycota	saccharomyceta	Pezizomycotina	leotiomyceta	Eurotiomycetes	Chaetothyriomycetidae	Chaetothyriales	Herpotrichiellaceae	Exophiala	Exophiala dermatitidis	Exophiala dermatitidis NIH/UT8656
1	cellular organisms	Eukaryota	Opisthokonta	Fungi	Dikarya	Ascomycota	saccharomyceta	Pezizomycotina	leotiomyceta	Eurotiomycetes	Chaetothyriomycetidae	Verrucariales	Verrucariaceae
1	cellular organisms	Eukaryota	Opisthokonta	Fungi	Dikarya	Ascomycota	saccharomyceta	Pezizomycotina	leotiomyceta	sordariomyceta	Leotiomycetes	Erysiphales	Erysiphaceae	Blumeria	Blumeria graminis
5	cellular organisms	Eukaryota	Opisthokonta	Fungi	Dikarya	Ascomycota	saccharomyceta	Pezizomycotina	leotiomyceta	dothideomyceta	Dothideomycetes	Pleosporomycetidae	Pleosporales	Amniculicolaceae	Amniculicola	Amniculicola lignicola	Amniculicola lignicola CBS 123094
5	cellular organisms	Eukaryota	Opisthokonta	Fungi	Dikarya	Ascomycota	saccharomyceta	Pezizomycotina	leotiomyceta	dothideomyceta	Dothideomycetes	Dothideomycetes incertae sedis	Trypetheliales	Trypetheliaceae	Viridothelium	Viridothelium virens
7	cellular organisms	Eukaryota	Opisthokonta	Fungi	Dikarya	Basidiomycota	Agaricomycotina	Agaricomycetes	Agaricomycetidae	Agaricales	Bolbitiaceae	Agrocybe	Agrocybe pediades
1	cellular organisms	Eukaryota	Opisthokonta	Fungi	Dikarya	Ascomycota	saccharomyceta	Pezizomycotina	leotiomyceta	sordariomyceta	Sordariomycetes	Hypocreomycetidae	Glomerellales	Glomerellaceae	Colletotrichum	Colletotrichum destructivum species complex	Colletotrichum shisoi
1	cellular organisms	Eukaryota	Opisthokonta	Fungi	Dikarya	Ascomycota	saccharomyceta	Pezizomycotina	leotiomyceta	sordariomyceta	Leotiomycetes	Erysiphales	Erysiphaceae	Golovinomyces
1	cellular organisms	Eukaryota	Opisthokonta	Fungi	Dikarya	Ascomycota	saccharomyceta	Pezizomycotina	leotiomyceta	sordariomyceta	Sordariomycetes	Xylariomycetidae	Xylariales	Hypoxylaceae
1	cellular organisms	Eukaryota	Opisthokonta	Fungi	Dikarya	Ascomycota	saccharomyceta	Pezizomycotina	leotiomyceta	dothideomyceta	Dothideomycetes	Pleosporomycetidae	Pleosporales	Pleosporineae	Phaeosphaeriaceae
2	cellular organisms	Eukaryota	Opisthokonta	Fungi	Dikarya	Ascomycota	saccharomyceta	Pezizomycotina	leotiomyceta	sordariomyceta	Sordariomycetes	Hypocreomycetidae	Glomerellales	Glomerellaceae	Colletotrichum	Colletotrichum spaethianum species complex	Colletotrichum incanum
2	cellular organisms	Eukaryota	Opisthokonta	Fungi	Dikarya	Ascomycota	saccharomyceta	Saccharomycotina	Saccharomycetes	Saccharomycetales	Metschnikowiaceae	Clavispora	Clavispora/Candida clade	[Candida] pseudohaemulonis
1	cellular organisms	Eukaryota	Opisthokonta	Fungi	Dikarya	Ascomycota	saccharomyceta	Pezizomycotina	leotiomyceta	sordariomyceta	Sordariomycetes	Hypocreomycetidae	Glomerellales	Glomerellaceae	Colletotrichum	Colletotrichum destructivum species complex	Colletotrichum higginsianum	Colletotrichum higginsianum IMI 349063
5	cellular organisms	Eukaryota	Opisthokonta	Fungi	Dikarya	Ascomycota	saccharomyceta	Pezizomycotina	leotiomyceta	sordariomyceta	Sordariomycetes	Xylariomycetidae	Xylariales	Pseudomassariaceae	Pseudomassariella	Pseudomassariella vexata
2	cellular organisms	Eukaryota	Opisthokonta	Fungi	Dikarya	Basidiomycota	Agaricomycotina	Agaricomycetes	Agaricomycetidae	Boletales	Suillineae	Suillaceae	Suillus	Suillus brevipes	Suillus brevipes Sb2
3	cellular organisms	Eukaryota	Opisthokonta	Fungi	Dikarya	Ascomycota	saccharomyceta	Pezizomycotina	leotiomyceta	dothideomyceta	Dothideomycetes	Dothideomycetidae	Mycosphaerellales	Mycosphaerellaceae	Cercospora	Cercospora zeina
4	cellular organisms	Eukaryota	Opisthokonta	Fungi	Dikarya	Ascomycota	saccharomyceta	Pezizomycotina	leotiomyceta	sordariomyceta	Sordariomycetes	Hypocreomycetidae	Hypocreales	Clavicipitaceae	Metarhizium	Metarhizium rileyi
5	cellular organisms	Eukaryota	Opisthokonta	Fungi	Dikarya	Ascomycota	saccharomyceta	Pezizomycotina	leotiomyceta	dothideomyceta	Dothideomycetes	Dothideomycetidae	Dothideales	Dothioraceae	Delphinella	Delphinella strobiligena
5	cellular organisms	Eukaryota	Opisthokonta	Fungi	Dikarya	Basidiomycota	Ustilaginomycotina	Exobasidiomycetes	Ceraceosorales	Ceraceosoraceae	Ceraceosorus
3	cellular organisms	Eukaryota	Opisthokonta	Fungi	Dikarya	Ascomycota	saccharomyceta	Pezizomycotina	leotiomyceta	Eurotiomycetes	Eurotiomycetidae	Onygenales	Arthrodermataceae	Nannizzia	Nannizzia gypsea	Nannizzia gypsea CBS 118893
2	cellular organisms	Eukaryota	Opisthokonta	Fungi	Dikarya	Basidiomycota	Ustilaginomycotina	Exobasidiomycetes	Microstromatales	Microstromatales incertae sedis	Jaminaea	Jaminaea angkorensis
2	cellular organisms	Eukaryota	Opisthokonta	Fungi	Dikarya	Ascomycota	Taphrinomycotina	Schizosaccharomycetes	Schizosaccharomycetales	Schizosaccharomycetaceae	Schizosaccharomyces	Schizosaccharomyces japonicus	Schizosaccharomyces japonicus yFS275
1	cellular organisms	Eukaryota	Opisthokonta	Fungi	Dikarya	Basidiomycota	Pucciniomycotina	Pucciniomycetes	Pucciniales	Pucciniaceae	Puccinia	Puccinia graminis	Puccinia graminis f. sp. tritici
1	cellular organisms	Eukaryota	Opisthokonta	Fungi	Dikarya	Ascomycota	saccharomyceta	Saccharomycotina	Saccharomycetes	Saccharomycetales	Pichiaceae	Ogataea	Ogataea/Candida clade	[Candida] boidinii
1	cellular organisms	Eukaryota	Opisthokonta	Fungi	Dikarya	Ascomycota	saccharomyceta	Pezizomycotina	leotiomyceta	sordariomyceta	Sordariomycetes	Xylariomycetidae	Xylariales	Xylariaceae
2	cellular organisms	Eukaryota	Opisthokonta	Fungi	Dikarya	Ascomycota	saccharomyceta	Pezizomycotina	leotiomyceta	dothideomyceta	Dothideomycetes	Dothideomycetes incertae sedis
4	cellular organisms	Eukaryota	Opisthokonta	Fungi	Dikarya	Basidiomycota	Pucciniomycotina	Pucciniomycetes	Pucciniales
6	cellular organisms	Eukaryota	Opisthokonta	Fungi	Dikarya	Ascomycota	saccharomyceta
3	cellular organisms	Eukaryota	Opisthokonta	Fungi	Fungi incertae sedis	Mucoromycota	Mucoromycotina	Mucoromycetes	Mucorales	Cunninghamellaceae	Absidia	Absidia glauca
6	cellular organisms	Eukaryota	Opisthokonta	Fungi	Dikarya	Basidiomycota	Agaricomycotina	Agaricomycetes	Agaricomycetidae	Boletales	Suillineae	Suillaceae	Suillus
86	cellular organisms	Eukaryota	Opisthokonta	Fungi
4	cellular organisms	Eukaryota	Opisthokonta	Fungi	Dikarya	Ascomycota	saccharomyceta	Pezizomycotina	leotiomyceta	sordariomyceta	Leotiomycetes	Helotiales	Pleuroascaceae	Venustampulla	Venustampulla echinocandica
1	cellular organisms	Eukaryota	Opisthokonta	Fungi	Dikarya	Ascomycota	saccharomyceta	Pezizomycotina	leotiomyceta	Eurotiomycetes	Eurotiomycetidae	Eurotiales	Aspergillaceae	Aspergillus	Aspergillus subgen. Fumigati	Aspergillus fumigatus
10	cellular organisms	Eukaryota	Opisthokonta	Fungi	Dikarya	Ascomycota	saccharomyceta	Saccharomycotina	Saccharomycetes	Saccharomycetales	Lipomycetaceae	Lipomyces	Lipomyces starkeyi	Lipomyces starkeyi NRRL Y-11557
5	cellular organisms	Eukaryota	Opisthokonta	Fungi	Dikarya	Ascomycota	saccharomyceta	Pezizomycotina	leotiomyceta	Eurotiomycetes	Chaetothyriomycetidae	Verrucariales	Verrucariaceae	Endocarpon	Endocarpon pusillum	Endocarpon pusillum Z07020
4	cellular organisms	Eukaryota	Opisthokonta	Fungi	Dikarya	Basidiomycota	Agaricomycotina	Agaricomycetes	Agaricomycetidae	Agaricales	Nidulariaceae	Crucibulum	Crucibulum laeve
7	cellular organisms	Eukaryota	Opisthokonta	Fungi	Dikarya	Basidiomycota	Agaricomycotina	Agaricomycetes	Agaricomycetidae	Agaricales	Pluteaceae	Pluteus	Pluteus cervinus
27	cellular organisms	Eukaryota	Opisthokonta	Fungi	Dikarya	Ascomycota	saccharomyceta	Pezizomycotina	leotiomyceta	dothideomyceta	Dothideomycetes	Pleosporomycetidae	Pleosporales	Pleosporineae	Pleosporaceae	Decorospora	Decorospora gaudefroyi
2	cellular organisms	Eukaryota	Opisthokonta	Fungi	Dikarya	Basidiomycota	Agaricomycotina	Agaricomycetes	Agaricomycetes incertae sedis	Cantharellales	Ceratobasidiaceae	Rhizoctonia	Rhizoctonia solani	Rhizoctonia solani AG-3	Rhizoctonia solani 123E
4	cellular organisms	Eukaryota	Opisthokonta	Fungi	Dikarya	Ascomycota	saccharomyceta	Pezizomycotina	leotiomyceta	dothideomyceta	Dothideomycetes	Pleosporomycetidae	Pleosporales	Pleosporales incertae sedis	Aaosphaeria	Aaosphaeria arxii	Aaosphaeria arxii CBS 175.79
27	cellular organisms	Eukaryota	Opisthokonta	Fungi	Dikarya	Ascomycota	saccharomyceta	Pezizomycotina	leotiomyceta	dothideomyceta	Dothideomycetes	Dothideomycetidae	Capnodiales	Capnodiaceae	Polychaeton	Polychaeton citri	Polychaeton citri CBS 116435
10	cellular organisms	Eukaryota	Opisthokonta	Fungi	Dikarya	Ascomycota	saccharomyceta	Pezizomycotina	leotiomyceta	dothideomyceta	Dothideomycetes	Dothideomycetidae	Mycosphaerellales	Mycosphaerellaceae	Pseudocercospora	Pseudocercospora fijiensis	Pseudocercospora fijiensis CIRAD86
2	cellular organisms	Eukaryota	Opisthokonta	Fungi	Dikarya	Ascomycota	saccharomyceta	Pezizomycotina	leotiomyceta	dothideomyceta	Dothideomycetes	Dothideomycetes incertae sedis	Botryosphaeriales	Botryosphaeriaceae	Diplodia	Diplodia seriata
3	cellular organisms	Eukaryota	Opisthokonta	Fungi	Dikarya	Ascomycota	saccharomyceta	Pezizomycotina	leotiomyceta	Eurotiomycetes	Eurotiomycetidae	Eurotiales	Trichocomaceae	Talaromyces	Talaromyces atroroseus
8	cellular organisms	Eukaryota	Opisthokonta	Fungi	Dikarya	Ascomycota	saccharomyceta	Pezizomycotina	leotiomyceta	dothideomyceta	Dothideomycetes	Dothideomycetidae	Mycosphaerellales	Teratosphaeriaceae	Acidomyces	Acidomyces richmondensis
1	cellular organisms	Eukaryota	Opisthokonta	Fungi	Dikarya	Ascomycota	saccharomyceta	Pezizomycotina	leotiomyceta	dothideomyceta	Dothideomycetes	Dothideomycetidae	Mycosphaerellales	Teratosphaeriaceae	Hortaea	Hortaea werneckii	Hortaea werneckii EXF-2000
3	cellular organisms	Eukaryota	Opisthokonta	Fungi	Dikarya	Ascomycota	saccharomyceta	Pezizomycotina	leotiomyceta	sordariomyceta	Sordariomycetes	Hypocreomycetidae	Hypocreales	Stachybotryaceae	Stachybotrys	Stachybotrys chartarum	Stachybotrys chartarum IBT 40293
20	cellular organisms	Eukaryota	Opisthokonta	Fungi	Dikarya	Ascomycota	saccharomyceta	Pezizomycotina	leotiomyceta	dothideomyceta	Dothideomycetes	Pleosporomycetidae	Pleosporales	Pleosporineae	Pleosporaceae	Pyrenophora	Pyrenophora tritici-repentis
24	cellular organisms	Eukaryota	Opisthokonta	Fungi	Dikarya	Ascomycota	saccharomyceta	Pezizomycotina	leotiomyceta	sordariomyceta	Sordariomycetes	Hypocreomycetidae	Hypocreales	Nectriaceae	Fusarium	Fusarium tricinctum species complex	Fusarium avenaceum
6	cellular organisms	Eukaryota	Opisthokonta	Fungi	Dikarya	Ascomycota	saccharomyceta	Pezizomycotina	leotiomyceta	Eurotiomycetes	Eurotiomycetidae	Eurotiales	Aspergillaceae
7	cellular organisms	Eukaryota	Opisthokonta	Fungi	Dikarya	Ascomycota	saccharomyceta	Pezizomycotina	leotiomyceta	sordariomyceta	Leotiomycetes
3	cellular organisms	Eukaryota	Opisthokonta	Fungi	Dikarya	Ascomycota	saccharomyceta	Pezizomycotina	leotiomyceta	sordariomyceta	Sordariomycetes	Hypocreomycetidae	Hypocreales	Nectriaceae	Fusarium	Fusarium solani species complex	[Nectria] haematococca	[Nectria] haematococca mpVI	[Nectria] haematococca mpVI 77-13-4
1	cellular organisms	Eukaryota	Opisthokonta	Choanoflagellata	Craspedida	Salpingoecidae	Monosiga	Monosiga ovata
5	cellular organisms	Eukaryota	Opisthokonta	Fungi	Dikarya	Ascomycota	saccharomyceta	Pezizomycotina	leotiomyceta	Eurotiomycetes	Eurotiomycetidae	Eurotiales	Aspergillaceae	Aspergillus	Aspergillus subgen. Cremei	Aspergillus wentii	Aspergillus wentii DTO 134E9
3	cellular organisms	Eukaryota	Opisthokonta	Fungi	Dikarya	Basidiomycota	Agaricomycotina	Agaricomycetes	Agaricomycetes incertae sedis	Polyporales	Phanerochaetaceae	Phlebiopsis	Phlebiopsis gigantea	Phlebiopsis gigantea 11061_1 CR5-6
33	cellular organisms	Eukaryota	Opisthokonta	Fungi	Dikarya	Ascomycota	saccharomyceta	Pezizomycotina	leotiomyceta	dothideomyceta	Dothideomycetes	Dothideomycetidae	Cladosporiales	Cladosporiaceae	Rachicladosporium
3	cellular organisms	Eukaryota	Opisthokonta	Fungi	Dikarya	Ascomycota	saccharomyceta	Pezizomycotina	leotiomyceta	dothideomyceta	Dothideomycetes	Dothideomycetidae	Mycosphaerellales	Teratosphaeriaceae
4	cellular organisms	Eukaryota	Opisthokonta	Fungi	Dikarya	Basidiomycota	Agaricomycotina	Agaricomycetes	Agaricomycetes incertae sedis	Cantharellales	Ceratobasidiaceae	Rhizoctonia	Rhizoctonia solani	Rhizoctonia solani AG-3
2	cellular organisms	Eukaryota	Opisthokonta	Fungi	Dikarya	Ascomycota	saccharomyceta	Pezizomycotina	leotiomyceta	Eurotiomycetes	Chaetothyriomycetidae	Chaetothyriales	Herpotrichiellaceae	Exophiala	Exophiala xenobiotica
1	cellular organisms	Eukaryota	Opisthokonta	Fungi	Dikarya	Ascomycota	saccharomyceta	Saccharomycotina	Saccharomycetes	Saccharomycetales	Pichiaceae
9	cellular organisms	Eukaryota	Opisthokonta	Fungi	Dikarya	Basidiomycota	Agaricomycotina	Agaricomycetes	Agaricomycetidae	Agaricales	Physalacriaceae	Cylindrobasidium	Cylindrobasidium torrendii	Cylindrobasidium torrendii FP15055 ss-10
2	cellular organisms	Eukaryota	Opisthokonta	Fungi	Dikarya	Ascomycota	saccharomyceta	Pezizomycotina	leotiomyceta	sordariomyceta	Sordariomycetes	Hypocreomycetidae	Hypocreales	Hypocreaceae	Trichoderma	Trichoderma arundinaceum
3	cellular organisms	Eukaryota	Opisthokonta	Fungi	Dikarya	Basidiomycota	Ustilaginomycotina	Ustilaginomycetes	Ustilaginales	Ustilaginaceae	Sporisorium	Sporisorium scitamineum
4	cellular organisms	Eukaryota	Opisthokonta	Fungi	Dikarya	Ascomycota	saccharomyceta	Pezizomycotina	leotiomyceta	dothideomyceta	Dothideomycetes	Dothideomycetidae	Mycosphaerellales	Dissoconiaceae	Dissoconium	Dissoconium aciculare	Dissoconium aciculare CBS 342.82
74	cellular organisms	Eukaryota	Opisthokonta	Fungi	Dikarya	Basidiomycota	Agaricomycotina	Tremellomycetes	Tremellales	Cryptococcaceae	Kwoniella	Kwoniella mangrovensis
3	cellular organisms	Eukaryota	Opisthokonta	Fungi	Dikarya	Ascomycota	saccharomyceta	Pezizomycotina	leotiomyceta	Eurotiomycetes	Eurotiomycetidae	Eurotiales
1	cellular organisms	Eukaryota	Opisthokonta	Fungi	Dikarya	Basidiomycota	Agaricomycotina	Tremellomycetes	Tremellales	Cryptococcaceae	Cryptococcus	Cryptococcus neoformans species complex	Cryptococcus neoformans	Cryptococcus neoformans var. grubii	Cryptococcus neoformans var. grubii Bt85
6	cellular organisms	Eukaryota	Opisthokonta	Fungi	Dikarya	Basidiomycota	Agaricomycotina	Agaricomycetes	Agaricomycetidae	Boletales	Coniophorineae	Serpulaceae	Serpula	Serpula lacrymans	Serpula lacrymans var. lacrymans
8	cellular organisms	Eukaryota	Opisthokonta	Fungi	Dikarya	Ascomycota	saccharomyceta	Pezizomycotina	leotiomyceta	sordariomyceta	Sordariomycetes	Hypocreomycetidae	Hypocreales	Ophiocordycipitaceae	Purpureocillium	Purpureocillium lilacinum
3	cellular organisms	Eukaryota	Opisthokonta	Fungi	Dikarya	Basidiomycota	Ustilaginomycotina	Malasseziomycetes	Malasseziales	Malasseziaceae	Malassezia	Malassezia sympodialis	Malassezia sympodialis ATCC 42132
2	cellular organisms	Eukaryota	Opisthokonta	Fungi	Dikarya	Ascomycota	saccharomyceta	Pezizomycotina	leotiomyceta	Eurotiomycetes	Eurotiomycetidae	Onygenales	Arthrodermataceae	Microsporum	Microsporum canis	Microsporum canis CBS 113480
3	cellular organisms	Eukaryota	Opisthokonta	Fungi	Dikarya	Ascomycota	saccharomyceta	Pezizomycotina	Pezizomycetes	Pezizales	Ascobolaceae	Ascobolus	Ascobolus immersus	Ascobolus immersus RN42
11	cellular organisms	Eukaryota	Opisthokonta	Fungi	Fungi incertae sedis	Mucoromycota	Glomeromycotina	Glomeromycetes	Glomerales	Glomeraceae	Rhizophagus
4	cellular organisms	Eukaryota	Opisthokonta	Fungi	Dikarya	Basidiomycota	Agaricomycotina	Agaricomycetes	Agaricomycetidae	Agaricales	Omphalotaceae	Gymnopus	Gymnopus luxurians	Gymnopus luxurians FD-317 M1
2	cellular organisms	Eukaryota	Opisthokonta	Fungi	Dikarya	Ascomycota	saccharomyceta	Pezizomycotina	leotiomyceta	sordariomyceta	Sordariomycetes	Hypocreomycetidae	Hypocreales	Clavicipitaceae	Pochonia	Pochonia chlamydosporia
2	cellular organisms	Eukaryota	Opisthokonta	Fungi	Dikarya	Ascomycota	saccharomyceta	Saccharomycotina	Saccharomycetes	Saccharomycetales	Phaffomycetaceae	Komagataella
28	cellular organisms	Eukaryota	Opisthokonta	Fungi	Dikarya	Basidiomycota	Agaricomycotina	Tremellomycetes	Tremellales	Tremellaceae	Tremella	Tremella mesenterica	Tremella mesenterica DSM 1558
2	cellular organisms	Eukaryota	Opisthokonta	Fungi	Dikarya	Basidiomycota	Pucciniomycotina
2	cellular organisms	Eukaryota	Opisthokonta	Fungi	Dikarya	Ascomycota	saccharomyceta	Pezizomycotina	leotiomyceta	Eurotiomycetes	Eurotiomycetidae	Eurotiales	Aspergillaceae	Aspergillus	Aspergillus tanneri
4	cellular organisms	Eukaryota	Opisthokonta	Fungi	Dikarya	Basidiomycota	Agaricomycotina	Agaricomycetes	Agaricomycetes incertae sedis	Polyporales	Fomitopsidaceae	Daedalea	Daedalea quercina	Daedalea quercina L-15889
19	cellular organisms	Eukaryota	Opisthokonta	Fungi	Dikarya	Ascomycota	saccharomyceta	Saccharomycotina	Saccharomycetes	Saccharomycetales
7	cellular organisms	Eukaryota	Opisthokonta	Fungi	Dikarya	Ascomycota	saccharomyceta	Pezizomycotina	Pezizomycetes	Pezizales	Pyronemataceae	Sphaerosporella	Sphaerosporella brunnea
3	cellular organisms	Eukaryota	Opisthokonta	Fungi	Dikarya	Ascomycota	saccharomyceta	Pezizomycotina	leotiomyceta	sordariomyceta	Leotiomycetes	Leotiomycetes incertae sedis	Pseudeurotiaceae	Pseudogymnoascus	Pseudogymnoascus destructans	Pseudogymnoascus destructans 20631-21
8	cellular organisms	Eukaryota	Opisthokonta	Fungi	Dikarya	Basidiomycota	Wallemiomycotina	Wallemiomycetes	Wallemiales	Wallemiaceae	Wallemia
1	cellular organisms	Eukaryota	Opisthokonta	Fungi	Dikarya	Ascomycota	saccharomyceta	Pezizomycotina	leotiomyceta	Eurotiomycetes	Eurotiomycetidae	Eurotiales	Aspergillaceae	Aspergillus	Aspergillus mulundensis
7	cellular organisms	Eukaryota	Opisthokonta	Fungi	Dikarya	Basidiomycota	Agaricomycotina	Agaricomycetes	Agaricomycetidae	Agaricales	Psathyrellaceae	Coprinopsis	Coprinopsis cinerea	Coprinopsis cinerea okayama7#130
13	cellular organisms	Eukaryota	Opisthokonta	Fungi	Dikarya	Basidiomycota	Ustilaginomycotina	Exobasidiomycetes	Exobasidiales	Brachybasidiaceae	Meira	Meira miltonrushii
2	cellular organisms	Eukaryota	Opisthokonta	Fungi	Dikarya	Ascomycota	saccharomyceta	Pezizomycotina	leotiomyceta	dothideomyceta	Dothideomycetes	Dothideomycetidae	Mycosphaerellales	Mycosphaerellaceae	Zymoseptoria	Zymoseptoria tritici	Zymoseptoria tritici IPO323
1	cellular organisms	Eukaryota	Opisthokonta	Fungi	Dikarya	Basidiomycota	Agaricomycotina	Tremellomycetes	Tremellales	Cryptococcaceae	Cryptococcus	Cryptococcus neoformans species complex	Cryptococcus neoformans	Cryptococcus neoformans var. grubii	Cryptococcus neoformans var. grubii c45
22	cellular organisms	Eukaryota	Opisthokonta	Fungi	Dikarya	Basidiomycota	Agaricomycotina	Agaricomycetes	Agaricomycetes incertae sedis
4	cellular organisms	Eukaryota	Opisthokonta	Fungi	Fungi incertae sedis	Chytridiomycota	Chytridiomycota incertae sedis	Neocallimastigomycetes	Neocallimastigales	Neocallimastigaceae
1	cellular organisms	Eukaryota	Opisthokonta	Fungi	Dikarya	Ascomycota	saccharomyceta	Pezizomycotina	leotiomyceta	sordariomyceta	Leotiomycetes	Helotiales	Sclerotiniaceae	Monilinia	Monilinia fructigena
10	cellular organisms	Eukaryota	Opisthokonta	Fungi	Dikarya	Basidiomycota	Agaricomycotina	Agaricomycetes	Agaricomycetes incertae sedis	Hymenochaetales	Hymenochaetaceae	Pyrrhoderma	Pyrrhoderma noxium
5	cellular organisms	Eukaryota	Opisthokonta	Fungi	Dikarya	Ascomycota	saccharomyceta	Pezizomycotina	leotiomyceta	dothideomyceta	Dothideomycetes	Pleosporomycetidae	Pleosporales	Pleosporineae	Didymellaceae
5	cellular organisms	Eukaryota	Opisthokonta	Fungi	Dikarya	Ascomycota	saccharomyceta	Pezizomycotina	leotiomyceta	Eurotiomycetes	Chaetothyriomycetidae	Chaetothyriales
18	cellular organisms	Eukaryota	Opisthokonta	Fungi	Dikarya	Ascomycota	Taphrinomycotina	Taphrinomycotina incertae sedis	Saitoella	Saitoella complicata	Saitoella complicata NRRL Y-17804
2	cellular organisms	Eukaryota	Opisthokonta	Fungi	Dikarya	Ascomycota	saccharomyceta	Pezizomycotina	leotiomyceta	dothideomyceta	Dothideomycetes	Dothideomycetidae	Mycosphaerellales	Teratosphaeriaceae	Hortaea
1	cellular organisms	Eukaryota	Opisthokonta	Fungi	Dikarya	Ascomycota	saccharomyceta	Pezizomycotina	leotiomyceta	sordariomyceta	Sordariomycetes	Hypocreomycetidae	Hypocreales	Ophiocordycipitaceae	Ophiocordyceps	Ophiocordyceps sinensis
6	cellular organisms	Eukaryota	Opisthokonta	Fungi	Fungi incertae sedis	Mucoromycota	Mucoromycotina	Mucoromycetes	Mucorales	Cunninghamellaceae	Absidia	Absidia repens
9	cellular organisms	Eukaryota	Opisthokonta	Fungi	Dikarya	Basidiomycota	Pucciniomycotina	Microbotryomycetes	Microbotryales	Microbotryaceae	Microbotryum
7	cellular organisms	Eukaryota	Opisthokonta	Fungi	Dikarya	Ascomycota	saccharomyceta	Pezizomycotina	leotiomyceta	dothideomyceta	Dothideomycetes	Pleosporomycetidae	Pleosporales	Massarineae	Didymosphaeriaceae	Paraphaeosphaeria	Paraphaeosphaeria sporulosa
3	cellular organisms	Eukaryota	Opisthokonta	Fungi	Dikarya	Ascomycota	saccharomyceta	Pezizomycotina	leotiomyceta	sordariomyceta	Sordariomycetes	Hypocreomycetidae	Hypocreales	Hypocreaceae	Trichoderma	Trichoderma asperellum	Trichoderma asperellum CBS 433.97
21	cellular organisms	Eukaryota	Opisthokonta	Fungi	Fungi incertae sedis	Mucoromycota	Glomeromycotina	Glomeromycetes	Glomerales	Glomeraceae	Rhizophagus	Rhizophagus clarus
1	cellular organisms	Eukaryota	Opisthokonta	Fungi	Dikarya	Ascomycota	saccharomyceta	Pezizomycotina	leotiomyceta	sordariomyceta	Sordariomycetes	Sordariomycetidae	Diaporthales	Valsaceae	Valsa	Valsa mali	Valsa mali var. pyri
11	cellular organisms	Eukaryota	Opisthokonta	Fungi	Dikarya	Basidiomycota	Agaricomycotina	Agaricomycetes	Agaricomycetidae	Agaricales	Agaricales incertae sedis	Dendrothele	Dendrothele bispora	Dendrothele bispora CBS 962.96
2	cellular organisms	Eukaryota	Opisthokonta	Fungi	Dikarya	Ascomycota	saccharomyceta	Pezizomycotina	leotiomyceta	sordariomyceta	Sordariomycetes	Hypocreomycetidae	Hypocreales	Hypocreaceae	Escovopsis	Escovopsis weberi
7	cellular organisms	Eukaryota	Opisthokonta	Fungi	Dikarya	Ascomycota	saccharomyceta	Saccharomycotina	Saccharomycetes	Saccharomycetales	Metschnikowiaceae
1	cellular organisms	Eukaryota	Opisthokonta	Fungi	Dikarya	Ascomycota	saccharomyceta	Pezizomycotina	leotiomyceta	Eurotiomycetes	Eurotiomycetidae	Eurotiales	Aspergillaceae	Penicillium	Penicillium sclerotiorum
19	cellular organisms	Eukaryota	Opisthokonta	Fungi	Fungi incertae sedis	Chytridiomycota	Chytridiomycota incertae sedis	Chytridiomycetes	Spizellomycetales	Powellomycetaceae	Powellomyces	Powellomyces hirtus
2	cellular organisms	Eukaryota	Opisthokonta	Fungi	Dikarya	Ascomycota	saccharomyceta	Pezizomycotina	leotiomyceta	Eurotiomycetes	Chaetothyriomycetidae	Chaetothyriales	Herpotrichiellaceae	Phialophora	Phialophora americana
93	cellular organisms	Eukaryota	Opisthokonta	Fungi	Dikarya	Basidiomycota	Agaricomycotina	Tremellomycetes	Trichosporonales	Trichosporonaceae	Trichosporon	Trichosporon asahii	Trichosporon asahii var. asahii
10	cellular organisms	Eukaryota	Opisthokonta	Fungi	Dikarya	Basidiomycota	Agaricomycotina	Tremellomycetes	Tremellales	Cryptococcaceae	Cryptococcus	Cryptococcus gattii species complex	Cryptococcus gattii VGII
9	cellular organisms	Eukaryota	Opisthokonta	Fungi	Dikarya	Ascomycota	saccharomyceta	Pezizomycotina	leotiomyceta	dothideomyceta	Dothideomycetes	Dothideomycetidae	Cladosporiales	Cladosporiaceae	Rachicladosporium	Rachicladosporium antarcticum
6	cellular organisms	Eukaryota	Opisthokonta	Fungi	Dikarya	Basidiomycota	Agaricomycotina	Agaricomycetes	Agaricomycetes incertae sedis	Hymenochaetales	Hymenochaetaceae	Sanghuangporus	Sanghuangporus baumii
7	cellular organisms	Eukaryota	Opisthokonta	Fungi	Dikarya	Basidiomycota	Agaricomycotina	Agaricomycetes	Agaricomycetes incertae sedis	Cantharellales	Ceratobasidiaceae	Ceratobasidium	Ceratobasidium theobromae
1	cellular organisms	Eukaryota	Opisthokonta	Fungi	Dikarya	Ascomycota	saccharomyceta	Pezizomycotina	leotiomyceta	sordariomyceta	Sordariomycetes	Sordariomycetidae	Ophiostomatales	Ophiostomataceae	Sporothrix	Sporothrix schenckii
9	cellular organisms	Eukaryota	Opisthokonta	Fungi	Dikarya	Basidiomycota	Agaricomycotina	Agaricomycetes	Agaricomycetes incertae sedis	Trechisporales	Hydnodontaceae	Sistotremastrum
4	cellular organisms	Eukaryota	Opisthokonta	Fungi	Dikarya	Ascomycota	saccharomyceta	Pezizomycotina	leotiomyceta	sordariomyceta	Sordariomycetes	Xylariomycetidae	Xylariales	Sporocadaceae	Pestalotiopsis	Pestalotiopsis fici	Pestalotiopsis fici W106-1
4	cellular organisms	Eukaryota	Opisthokonta	Fungi	Dikarya	Ascomycota	saccharomyceta	Pezizomycotina	leotiomyceta	sordariomyceta	Sordariomycetes	Sordariomycetidae	Ophiostomatales	Ophiostomataceae	Sporothrix	Sporothrix insectorum	Sporothrix insectorum RCEF 264
1	cellular organisms	Eukaryota	Opisthokonta	Fungi	Dikarya	Basidiomycota	Agaricomycotina	Agaricomycetes	Agaricomycetes incertae sedis	Hymenochaetales
1	cellular organisms	Eukaryota	Opisthokonta	Fungi	Dikarya	Ascomycota	saccharomyceta	Pezizomycotina	leotiomyceta	Eurotiomycetes	Eurotiomycetidae	Eurotiales	Aspergillaceae	Aspergillus	Aspergillus aculeatinus	Aspergillus aculeatinus CBS 121060
3	cellular organisms	Eukaryota	Opisthokonta	Fungi	Dikarya	Basidiomycota	Agaricomycotina	Agaricomycetes	Agaricomycetidae	Boletales	Paxilineae	Paxillaceae	Paxillus	Paxillus rubicundulus	Paxillus rubicundulus Ve08.2h10
2	cellular organisms	Eukaryota	Opisthokonta	Fungi	Dikarya	Ascomycota	saccharomyceta	Pezizomycotina	leotiomyceta	sordariomyceta	Sordariomycetes	Hypocreomycetidae	Hypocreales	Ophiocordycipitaceae	Tolypocladium	Tolypocladium paradoxum
4	cellular organisms	Eukaryota	Opisthokonta	Fungi	Dikarya	Ascomycota	saccharomyceta	Pezizomycotina	leotiomyceta	dothideomyceta	Dothideomycetes	Dothideomycetes incertae sedis	Phaeotrichales	Phaeotrichaceae	Trichodelitschia	Trichodelitschia bisporula
7	cellular organisms	Eukaryota	Opisthokonta	Fungi	Dikarya	Ascomycota	saccharomyceta	Pezizomycotina	leotiomyceta	dothideomyceta	Dothideomycetes	Dothideomycetes incertae sedis	Cryomyces	Cryomyces minteri
4	cellular organisms	Eukaryota	Opisthokonta	Fungi	Dikarya	Ascomycota	saccharomyceta	Pezizomycotina	leotiomyceta	dothideomyceta	Dothideomycetes	Pleosporomycetidae	Pleosporales	Pleosporineae	Leptosphaeriaceae
8	cellular organisms	Eukaryota	Opisthokonta	Fungi	Dikarya	Basidiomycota	Agaricomycotina	Agaricomycetes	Agaricomycetidae	Agaricales	Strophariaceae	Psilocybe	Psilocybe cyanescens
2	cellular organisms	Eukaryota	Opisthokonta	Fungi	Dikarya	Ascomycota	saccharomyceta	Pezizomycotina	leotiomyceta	sordariomyceta	Sordariomycetes	Hypocreomycetidae	Hypocreales	Hypocreaceae	Trichoderma	Trichoderma longibrachiatum	Trichoderma longibrachiatum ATCC 18648
1	cellular organisms	Eukaryota	Opisthokonta	Fungi	Dikarya	Ascomycota	saccharomyceta	Saccharomycotina	Saccharomycetes	Saccharomycetales	Debaryomycetaceae	Debaryomyces
1	cellular organisms	Eukaryota	Opisthokonta	Fungi	Dikarya	Ascomycota	saccharomyceta	Pezizomycotina	leotiomyceta	Eurotiomycetes	Eurotiomycetidae	Onygenales	Ajellomycetaceae	Histoplasma	Histoplasma capsulatum	Histoplasma capsulatum G186AR
1	cellular organisms	Eukaryota	Opisthokonta	Fungi	Dikarya	Ascomycota	saccharomyceta	Pezizomycotina	leotiomyceta	sordariomyceta	Sordariomycetes	Hypocreomycetidae	Hypocreales	Nectriaceae	Fusarium	Fusarium fujikuroi species complex	Fusarium mangiferae
1	cellular organisms	Eukaryota	Opisthokonta	Fungi	Fungi incertae sedis	Microsporidia	Apansporoblastina	Nosematidae	Vittaforma	Vittaforma corneae	Vittaforma corneae ATCC 50505
3	cellular organisms	Eukaryota	Opisthokonta	Fungi	Dikarya	Ascomycota	saccharomyceta	Pezizomycotina	leotiomyceta	sordariomyceta	Sordariomycetes	Hypocreomycetidae	Hypocreales	Clavicipitaceae	Metarhizium
5	cellular organisms	Eukaryota	Opisthokonta	Fungi	Dikarya	Ascomycota	saccharomyceta	Pezizomycotina	leotiomyceta	dothideomyceta	Dothideomycetes	Pleosporomycetidae	Pleosporales	Massarineae	Didymosphaeriaceae
1	cellular organisms	Eukaryota	Opisthokonta	Fungi	Dikarya	Basidiomycota	Agaricomycotina	Agaricomycetes	Agaricomycetes incertae sedis	Polyporales	Polyporaceae	Trametes	Trametes pubescens
1	cellular organisms	Eukaryota	Opisthokonta	Fungi	Fungi incertae sedis	Microsporidia	Microsporidia incertae sedis	Nematocida	Nematocida displodere
4	cellular organisms	Eukaryota	Opisthokonta	Fungi	Dikarya	Ascomycota	saccharomyceta	Pezizomycotina	leotiomyceta	Eurotiomycetes	Eurotiomycetidae	Eurotiales	Aspergillaceae	Penicillium	Penicillium antarcticum
1	cellular organisms	Eukaryota	Opisthokonta	Fungi	Dikarya	Ascomycota	saccharomyceta	Pezizomycotina	leotiomyceta	sordariomyceta	Sordariomycetes	Hypocreomycetidae	Hypocreales	Stachybotryaceae	Stachybotrys	Stachybotrys chartarum	Stachybotrys chartarum IBT 40288
11	cellular organisms	Eukaryota	Opisthokonta	Fungi	Dikarya	Basidiomycota	Ustilaginomycotina	Exobasidiomycetes	Microstromatales	Microstromatales incertae sedis	Jaminaea	Jaminaea rosea
4	cellular organisms	Eukaryota	Opisthokonta	Fungi	Dikarya	Basidiomycota	Ustilaginomycotina	Ustilaginomycetes
1	cellular organisms	Eukaryota	Opisthokonta	Fungi	Dikarya	Ascomycota	saccharomyceta	Pezizomycotina	leotiomyceta	sordariomyceta	Sordariomycetes	Sordariomycetidae	Sordariales	Sordariaceae	Sordaria	Sordaria macrospora	Sordaria macrospora k-hell
19	cellular organisms	Eukaryota	Opisthokonta	Fungi	Dikarya	Basidiomycota	Pucciniomycotina	Mixiomycetes	Mixiales	Mixiaceae	Mixia	Mixia osmundae	Mixia osmundae IAM 14324
2	cellular organisms	Eukaryota	Opisthokonta	Fungi	Fungi incertae sedis	Mucoromycota	Mucoromycotina	Mucoromycetes	Mucorales	Mucorineae	Mucoraceae	Parasitella	Parasitella parasitica
5	cellular organisms	Eukaryota	Opisthokonta	Fungi	Dikarya	Basidiomycota	Agaricomycotina	Agaricomycetes	Agaricomycetes incertae sedis	Polyporales	Gelatoporiaceae	Obba	Obba rivulosa
1	cellular organisms	Eukaryota	Opisthokonta	Fungi	Dikarya	Ascomycota	saccharomyceta	Pezizomycotina	leotiomyceta	Eurotiomycetes	Eurotiomycetidae	Onygenales
3	cellular organisms	Eukaryota	Opisthokonta	Fungi	Dikarya	Ascomycota	saccharomyceta	Saccharomycotina	Saccharomycetes	Saccharomycetales	Phaffomycetaceae	Cyberlindnera	Cyberlindnera fabianii
3	cellular organisms	Eukaryota	Opisthokonta	Fungi	Fungi incertae sedis	Zoopagomycota	Kickxellomycotina	Kickxellomycetes	Kickxellales	Kickxellaceae	Linderina	Linderina pennispora
3	cellular organisms	Eukaryota	Opisthokonta	Fungi	Dikarya	Basidiomycota	Pucciniomycotina	Microbotryomycetes	Microbotryales	Microbotryaceae	Microbotryum	Microbotryum intermedium
1	cellular organisms	Eukaryota	Opisthokonta	Fungi	Dikarya	Basidiomycota	Agaricomycotina	Tremellomycetes	Tremellales	Cryptococcaceae	Cryptococcus	Cryptococcus gattii species complex	Cryptococcus gattii VGII	Cryptococcus gattii VGII MMRL2647
1	cellular organisms	Eukaryota	Opisthokonta	Fungi	Dikarya	Ascomycota	saccharomyceta	Pezizomycotina	leotiomyceta	dothideomyceta	Dothideomycetes	Pleosporomycetidae	Pleosporales	Pleosporineae	Pleosporaceae	Bipolaris	Bipolaris maydis	Bipolaris maydis C5
2	cellular organisms	Eukaryota	Opisthokonta	Fungi	Dikarya	Ascomycota	saccharomyceta	Pezizomycotina	leotiomyceta	dothideomyceta	Dothideomycetes	Pleosporomycetidae	Mytilinidiales	Mytilinidiaceae	Mytilinidion	Mytilinidion resinicola
2	cellular organisms	Eukaryota	Opisthokonta	Fungi	Dikarya	Ascomycota	saccharomyceta	Pezizomycotina	leotiomyceta	sordariomyceta	Leotiomycetes	Helotiales	Lachnaceae	Lachnellula	Lachnellula occidentalis
3	cellular organisms	Eukaryota	Opisthokonta	Fungi	Dikarya	Ascomycota	saccharomyceta	Pezizomycotina	leotiomyceta	sordariomyceta	Sordariomycetes	Sordariomycetidae	Sordariales	Chaetomiaceae	Chaetomium	Chaetomium thermophilum	Chaetomium thermophilum var. thermophilum	Chaetomium thermophilum var. thermophilum DSM 1495
1	cellular organisms	Eukaryota	Opisthokonta	Fungi	Dikarya	Ascomycota	saccharomyceta	Saccharomycotina	Saccharomycetes	Saccharomycetales	Debaryomycetaceae	Hyphopichia	Hyphopichia burtonii	Hyphopichia burtonii NRRL Y-1933
5	cellular organisms	Eukaryota	Opisthokonta	Fungi	Dikarya	Ascomycota	saccharomyceta	Pezizomycotina	leotiomyceta	dothideomyceta	Dothideomycetes	Pleosporomycetidae	Pleosporales	Delitschiaceae	Delitschia	Delitschia confertaspora	Delitschia confertaspora ATCC 74209
10	cellular organisms	Eukaryota	Opisthokonta	Fungi	Dikarya	Basidiomycota	Agaricomycotina	Tremellomycetes	Tremellales	Cryptococcaceae	Kwoniella	Kwoniella heveanensis	Kwoniella heveanensis BCC8398
2	cellular organisms	Eukaryota	Opisthokonta	Fungi	Dikarya	Ascomycota	saccharomyceta	Pezizomycotina	leotiomyceta	sordariomyceta	Sordariomycetes	Xylariomycetidae	Xylariales	Hypoxylaceae	Daldinia	Daldinia childiae
1	cellular organisms	Eukaryota	Opisthokonta	Fungi	Dikarya	Basidiomycota	Agaricomycotina	Agaricomycetes	Agaricomycetes incertae sedis	Polyporales	Dacryobolaceae	Postia	Postia placenta	Postia placenta Mad-698-R
94	cellular organisms	Eukaryota	Opisthokonta	Fungi	Dikarya	Basidiomycota	Agaricomycotina	Tremellomycetes	Tremellales	Cryptococcaceae	Kwoniella	Kwoniella pini	Kwoniella pini CBS 10737
4	cellular organisms	Eukaryota	Opisthokonta	Fungi	Dikarya	Ascomycota	saccharomyceta	Pezizomycotina	leotiomyceta	sordariomyceta	Leotiomycetes	Helotiales	Sclerotiniaceae	Monilinia	Monilinia fructicola
3	cellular organisms	Eukaryota	Opisthokonta	Fungi	Dikarya	Ascomycota	saccharomyceta	Pezizomycotina	leotiomyceta	sordariomyceta	Sordariomycetes	Hypocreomycetidae	Hypocreales	Ophiocordycipitaceae	Ophiocordyceps	unclassified Ophiocordyceps	Ophiocordyceps sp. 'camponoti-saundersi'
83	cellular organisms	Eukaryota	Opisthokonta	Fungi	Dikarya	Basidiomycota	Agaricomycotina	Agaricomycetes
1	cellular organisms	Eukaryota	Opisthokonta	Fungi	Dikarya	Ascomycota	saccharomyceta	Saccharomycotina	Saccharomycetes	Saccharomycetales	Debaryomycetaceae	Suhomyces	Suhomyces tanzawaensis	Suhomyces tanzawaensis NRRL Y-17324
7	cellular organisms	Eukaryota	Opisthokonta	Fungi	Dikarya	Ascomycota	saccharomyceta	Pezizomycotina	leotiomyceta	sordariomyceta
28	cellular organisms	Eukaryota	Opisthokonta	Fungi	Fungi incertae sedis	Mucoromycota	Mortierellomycotina	Mortierellomycetes	Mortierellales	Mortierellaceae	Mortierella	Mortierella elongata	Mortierella elongata AG-77
1	cellular organisms	Eukaryota	Opisthokonta	Fungi	Dikarya	Ascomycota	saccharomyceta	Saccharomycotina	Saccharomycetes	Saccharomycetales	Phaffomycetaceae	Wickerhamomyces	Wickerhamomyces ciferrii
2	cellular organisms	Eukaryota	Opisthokonta	Fungi	Dikarya	Ascomycota	saccharomyceta	Saccharomycotina	Saccharomycetes	Saccharomycetales	Metschnikowiaceae	Clavispora	Clavispora/Candida clade	[Candida] auris
3	cellular organisms	Eukaryota	Opisthokonta	Fungi	Dikarya	Basidiomycota	Agaricomycotina	Agaricomycetes	Agaricomycetes incertae sedis	Polyporales	Polyporaceae	Ganoderma
3	cellular organisms	Eukaryota	Opisthokonta	Fungi	Fungi incertae sedis	Chytridiomycota	Chytridiomycota incertae sedis	Chytridiomycetes	Rhizophydiales	Rhizophydiales incertae sedis	Batrachochytrium	Batrachochytrium dendrobatidis	Batrachochytrium dendrobatidis JAM81
4	cellular organisms	Eukaryota	Opisthokonta	Fungi	Dikarya	Basidiomycota	Agaricomycotina	Agaricomycetes	Agaricomycetidae	Agaricales	Strophariaceae	Galerina	Galerina marginata	Galerina marginata CBS 339.88
1	cellular organisms	Eukaryota	Opisthokonta	Fungi	Dikarya	Ascomycota	saccharomyceta	Pezizomycotina	leotiomyceta	sordariomyceta	Sordariomycetes	Hypocreomycetidae	Glomerellales	Plectosphaerellaceae	Verticillium	Verticillium nonalfalfae
3	cellular organisms	Eukaryota	Opisthokonta	Fungi	Dikarya	Ascomycota	saccharomyceta	Pezizomycotina	leotiomyceta	sordariomyceta	Sordariomycetes	Xylariomycetidae	Xylariales	Xylariales incertae sedis	Monosporascus	unclassified Monosporascus	Monosporascus sp. CRB-9-2
4	cellular organisms	Eukaryota	Opisthokonta	Fungi	Dikarya	Ascomycota	saccharomyceta	Pezizomycotina	leotiomyceta	dothideomyceta	Dothideomycetes	Dothideomycetes incertae sedis	Bonordeniella	Coniosporium apollinis	Coniosporium apollinis CBS 100218
11	cellular organisms	Eukaryota	Opisthokonta	Fungi	Dikarya	Basidiomycota	Pucciniomycotina	Pucciniomycetes	Pucciniales	Pucciniaceae	Puccinia	Puccinia coronata	Puccinia coronata var. avenae	Puccinia coronata var. avenae f. sp. avenae
223	cellular organisms	Eukaryota	Opisthokonta	Fungi	Dikarya	Basidiomycota	Agaricomycotina	Tremellomycetes	Tremellales	Cryptococcaceae	Kwoniella	Kwoniella heveanensis
106	cellular organisms	Eukaryota	Opisthokonta	Fungi	Dikarya	Basidiomycota	Pucciniomycotina	Microbotryomycetes	Leucosporidiales	Leucosporidiaceae	Leucosporidium	Leucosporidium creatinivorum
3	cellular organisms	Eukaryota	Opisthokonta	Fungi	Dikarya	Ascomycota	saccharomyceta	Pezizomycotina	leotiomyceta	dothideomyceta	Dothideomycetes	Dothideomycetes incertae sedis	Lineolatales	Lineolataceae	Lineolata	Lineolata rhizophorae
1	cellular organisms	Eukaryota	Opisthokonta	Fungi	Dikarya	Ascomycota	saccharomyceta	Pezizomycotina	leotiomyceta	dothideomyceta	Dothideomycetes	Pleosporomycetidae	Pleosporales	Pleosporineae	Pleosporaceae	Bipolaris	Bipolaris victoriae	Bipolaris victoriae FI3
5	cellular organisms	Eukaryota	Opisthokonta	Fungi	Dikarya	Ascomycota	saccharomyceta	Pezizomycotina	leotiomyceta	dothideomyceta	Dothideomycetes	Dothideomycetidae	Myriangiales	Myriangiaceae	Myriangium	Myriangium duriaei	Myriangium duriaei CBS 260.36
36	cellular organisms	Eukaryota	Opisthokonta	Fungi	Dikarya	Ascomycota	saccharomyceta	Pezizomycotina	leotiomyceta	dothideomyceta	Dothideomycetes	Pleosporomycetidae	Pleosporales	Pleosporineae
1	cellular organisms	Eukaryota	Opisthokonta	Fungi	Fungi incertae sedis	Zoopagomycota
5	cellular organisms	Eukaryota	Opisthokonta	Fungi	Dikarya	Ascomycota	saccharomyceta	Pezizomycotina	leotiomyceta	dothideomyceta	Dothideomycetes	Pleosporomycetidae	Pleosporales	Pleosporineae	Pleosporaceae	Bipolaris	Bipolaris maydis
87	cellular organisms	Eukaryota	Opisthokonta	Fungi	Dikarya	Basidiomycota	Agaricomycotina	Tremellomycetes	Tremellales	Cryptococcaceae
9	cellular organisms	Eukaryota	Opisthokonta	Fungi	Dikarya	Ascomycota	saccharomyceta	Pezizomycotina	leotiomyceta	sordariomyceta	Sordariomycetes	Sordariomycetidae	Magnaporthales	Magnaporthaceae	Gaeumannomyces	Gaeumannomyces tritici	Gaeumannomyces tritici R3-111a-1
5	cellular organisms	Eukaryota	Opisthokonta	Fungi	Fungi incertae sedis	Chytridiomycota	Chytridiomycota incertae sedis	Chytridiomycetes	Spizellomycetales	Spizellomycetaceae	Spizellomyces
1	cellular organisms	Eukaryota	Opisthokonta	Fungi	Dikarya	Ascomycota	saccharomyceta	Pezizomycotina	leotiomyceta	sordariomyceta	Sordariomycetes	Hypocreomycetidae	Hypocreales	Cordycipitaceae	Beauveria
13	cellular organisms	Eukaryota	Opisthokonta	Fungi	Dikarya	Ascomycota	saccharomyceta	Pezizomycotina	leotiomyceta	dothideomyceta	Dothideomycetes	Pleosporomycetidae	Pleosporales	Pleosporineae	Pleosporaceae	Alternaria	Alternaria sect. Alternaria	Alternaria arborescens
4	cellular organisms	Eukaryota	Opisthokonta	Fungi	Dikarya	Basidiomycota	Agaricomycotina	Agaricomycetes	Agaricomycetidae	Agaricales	Psathyrellaceae	Coprinopsis	Coprinopsis marcescibilis
1	cellular organisms	Eukaryota	Opisthokonta	Fungi	Dikarya	Basidiomycota	Pucciniomycotina	Pucciniomycetes	Pucciniales	Phakopsoraceae	Phakopsora
4	cellular organisms	Eukaryota	Opisthokonta	Fungi	Dikarya	Basidiomycota	Pucciniomycotina	Microbotryomycetes	Sporidiobolales	Sporidiobolaceae
19	cellular organisms	Eukaryota	Opisthokonta	Fungi	Dikarya	Ascomycota	saccharomyceta	Pezizomycotina	leotiomyceta	dothideomyceta	Dothideomycetes	Pleosporomycetidae	Pleosporales	Pleosporineae	Pleosporaceae	Exserohilum	Exserohilum turcicum	Exserohilum turcica Et28A
4	cellular organisms	Eukaryota	Opisthokonta	Fungi	Dikarya	Ascomycota	saccharomyceta	Pezizomycotina	Pezizomycetes	Pezizales	Pezizaceae	Terfezia	Terfezia boudieri	Terfezia boudieri ATCC MYA-4762
17	cellular organisms	Eukaryota	Opisthokonta	Fungi	Dikarya	Ascomycota	saccharomyceta	Pezizomycotina	leotiomyceta	Eurotiomycetes	Chaetothyriomycetidae	Chaetothyriales	Herpotrichiellaceae	Phialophora	Phialophora attinorum
3	cellular organisms	Eukaryota	Opisthokonta	Fungi	Dikarya	Ascomycota	saccharomyceta	Pezizomycotina	leotiomyceta	Eurotiomycetes	Chaetothyriomycetidae	Chaetothyriales	Herpotrichiellaceae	Capronia	Capronia epimyces	Capronia epimyces CBS 606.96
4	cellular organisms	Eukaryota	Opisthokonta	Fungi	Dikarya	Ascomycota	saccharomyceta	Pezizomycotina	leotiomyceta	Eurotiomycetes	Eurotiomycetidae	Eurotiales	Aspergillaceae	Aspergillus	Aspergillus ruber	Aspergillus ruber CBS 135680
19	cellular organisms	Eukaryota	Opisthokonta	Fungi	Dikarya	Basidiomycota	Agaricomycotina	Tremellomycetes	Tremellales	Cryptococcaceae	Cryptococcus	Cryptococcus floricola
14	cellular organisms	Eukaryota	Opisthokonta	Fungi	Dikarya	Basidiomycota	Agaricomycotina	Agaricomycetes	Agaricomycetes incertae sedis	Auriculariales	Exidiaceae	Exidia	Exidia glandulosa	Exidia glandulosa HHB12029
10	cellular organisms	Eukaryota	Opisthokonta	Fungi	Dikarya	Ascomycota	saccharomyceta	Pezizomycotina	leotiomyceta	sordariomyceta	Sordariomycetes	Hypocreomycetidae	Glomerellales	Glomerellaceae	Colletotrichum
31	cellular organisms	Eukaryota	Opisthokonta	Fungi	Dikarya	Basidiomycota	Pucciniomycotina	Pucciniomycetes	Pucciniales	Pucciniaceae	Puccinia	Puccinia striiformis	Puccinia striiformis f. sp. tritici	Puccinia striiformis f. sp. tritici PST-78
4	cellular organisms	Eukaryota	Opisthokonta	Fungi	Dikarya	Basidiomycota	Agaricomycotina	Agaricomycetes	Agaricomycetes incertae sedis	Polyporales	Polyporaceae	Trametes
99	cellular organisms	Eukaryota	Opisthokonta	Fungi	Dikarya	Basidiomycota	Agaricomycotina	Tremellomycetes	Tremellales	Cryptococcaceae	Kwoniella	Kwoniella bestiolae	Kwoniella bestiolae CBS 10118
93	cellular organisms	Eukaryota	Opisthokonta	Fungi	Dikarya	Basidiomycota	Agaricomycotina	Tremellomycetes	Tremellales	Cryptococcaceae	Kwoniella	Kwoniella dejecticola	Kwoniella dejecticola CBS 10117
2	cellular organisms	Eukaryota	Opisthokonta	Fungi	Dikarya	Ascomycota	saccharomyceta	Pezizomycotina	leotiomyceta	dothideomyceta	Dothideomycetes	Dothideomycetidae	Cladosporiales	Cladosporiaceae	Rachicladosporium	unclassified Rachicladosporium	Rachicladosporium sp. CCFEE 5018
15	cellular organisms	Eukaryota	Opisthokonta	Fungi	Dikarya	Basidiomycota	Agaricomycotina	Agaricomycetes	Agaricomycetes incertae sedis	Cantharellales	Ceratobasidiaceae	Rhizoctonia	Rhizoctonia solani
1	cellular organisms	Eukaryota	Opisthokonta	Fungi	Dikarya	Ascomycota	saccharomyceta	Pezizomycotina	leotiomyceta	sordariomyceta	Sordariomycetes	Xylariomycetidae	Xylariales	Xylariales incertae sedis	Monosporascus	unclassified Monosporascus	Monosporascus sp. MG133
24	cellular organisms	Eukaryota	Opisthokonta	Fungi	Dikarya	Ascomycota	saccharomyceta	Pezizomycotina	leotiomyceta	dothideomyceta	Dothideomycetes	Dothideomycetidae	Mycosphaerellales	Mycosphaerellaceae	Zasmidium	Zasmidium cellare	Zasmidium cellare ATCC 36951
3	cellular organisms	Eukaryota	Opisthokonta	Fungi	Dikarya	Ascomycota	saccharomyceta	Pezizomycotina	leotiomyceta	sordariomyceta	Sordariomycetes	Hypocreomycetidae	Hypocreales	Cordycipitaceae	Beauveria	Beauveria bassiana
410	cellular organisms	Eukaryota	Opisthokonta	Fungi	Dikarya	Basidiomycota	Agaricomycotina	Tremellomycetes	Cystofilobasidiales	Mrakiaceae	Phaffia	Phaffia rhodozyma
87	cellular organisms	Eukaryota	Opisthokonta	Fungi	Dikarya
33	cellular organisms	Eukaryota	Opisthokonta	Fungi	Dikarya	Ascomycota	saccharomyceta	Pezizomycotina	leotiomyceta	Eurotiomycetes	Chaetothyriomycetidae	Chaetothyriales	Cyphellophoraceae	Cyphellophora	Cyphellophora europaea	Cyphellophora europaea CBS 101466
7	cellular organisms	Eukaryota	Opisthokonta	Fungi	Dikarya	Ascomycota	saccharomyceta	Pezizomycotina	leotiomyceta	sordariomyceta	Leotiomycetes	Helotiales	Helotiales incertae sedis	Phialocephala	Phialocephala fortinii species complex	Phialocephala subalpina
1	cellular organisms	Eukaryota	Opisthokonta	Fungi	Dikarya	Ascomycota	saccharomyceta	Pezizomycotina	leotiomyceta	sordariomyceta	Sordariomycetes	Hypocreomycetidae	Hypocreales	Ophiocordycipitaceae	Tolypocladium
1	cellular organisms	Eukaryota	Opisthokonta	Fungi	Dikarya	Ascomycota	saccharomyceta	Pezizomycotina	leotiomyceta	sordariomyceta	Sordariomycetes	Xylariomycetidae	Xylariales	Hypoxylaceae	Hypoxylon	unclassified Hypoxylon	Hypoxylon sp. CI-4A
17	cellular organisms	Eukaryota	Opisthokonta	Fungi	Dikarya	Ascomycota	saccharomyceta	Pezizomycotina	leotiomyceta	sordariomyceta	Sordariomycetes	Hypocreomycetidae	Hypocreales	Hypocreales incertae sedis	Acremonium	Acremonium chrysogenum	Acremonium chrysogenum ATCC 11550
59	cellular organisms	Eukaryota	Opisthokonta	Fungi	Dikarya	Ascomycota	saccharomyceta	Saccharomycotina	Saccharomycetes	Saccharomycetales	Metschnikowiaceae	Metschnikowia	Metschnikowia aff. pulcherrima
3	cellular organisms	Eukaryota	Opisthokonta	Fungi	Dikarya	Ascomycota	saccharomyceta	Pezizomycotina	leotiomyceta	sordariomyceta	Sordariomycetes	Hypocreomycetidae	Hypocreales	Stachybotryaceae	Stachybotrys	Stachybotrys chlorohalonata	Stachybotrys chlorohalonata IBT 40285
19	cellular organisms	Eukaryota	Opisthokonta	Fungi	Dikarya	Ascomycota	saccharomyceta	Pezizomycotina	leotiomyceta	sordariomyceta	Sordariomycetes	Hypocreomycetidae	Hypocreales	Nectriaceae	Fusarium
7	cellular organisms	Eukaryota	Opisthokonta	Fungi	Dikarya	Ascomycota	saccharomyceta	Saccharomycotina	Saccharomycetes	Saccharomycetales	Metschnikowiaceae	Clavispora	Clavispora lusitaniae
4	cellular organisms	Eukaryota	Opisthokonta	Fungi	Dikarya	Ascomycota	saccharomyceta	Pezizomycotina	leotiomyceta	sordariomyceta	Leotiomycetes	Helotiales	Leotiaceae	Pezoloma	Pezoloma ericae species complex	Pezoloma ericae
1	cellular organisms	Eukaryota	Opisthokonta	Fungi	Dikarya	Ascomycota	saccharomyceta	Pezizomycotina	leotiomyceta	Eurotiomycetes	Chaetothyriomycetidae	Chaetothyriales	Herpotrichiellaceae	Fonsecaea	Fonsecaea pedrosoi	Fonsecaea pedrosoi CBS 271.37
9	cellular organisms	Eukaryota	Opisthokonta	Fungi	Dikarya	Ascomycota	saccharomyceta	Pezizomycotina	leotiomyceta	Eurotiomycetes	Eurotiomycetidae	Eurotiales	Aspergillaceae	Aspergillus	Aspergillus campestris	Aspergillus campestris IBT 28561
6	cellular organisms	Eukaryota	Opisthokonta	Fungi	Dikarya	Basidiomycota	Agaricomycotina	Agaricomycetes	Agaricomycetes incertae sedis	Russulales
7	cellular organisms	Eukaryota	Opisthokonta	Fungi	Fungi incertae sedis	Mucoromycota	Glomeromycotina	Glomeromycetes	Glomerales	Glomeraceae
6	cellular organisms	Eukaryota	Opisthokonta	Fungi	Fungi incertae sedis	Mucoromycota	Mucoromycotina	Endogonomycetes	Endogonales	Endogonaceae	Jimgerdemannia	Jimgerdemannia flammicorona
10	cellular organisms	Eukaryota	Opisthokonta	Fungi	Dikarya	Basidiomycota	Agaricomycotina	Dacrymycetes	Dacrymycetales	Dacrymycetaceae	Calocera	Calocera viscosa	Calocera viscosa TUFC12733
1	cellular organisms	Eukaryota	Opisthokonta	Fungi	Dikarya	Ascomycota	saccharomyceta	Pezizomycotina	leotiomyceta	Eurotiomycetes	Eurotiomycetidae	Onygenales	Arthrodermataceae	Trichophyton
6	cellular organisms	Eukaryota	Opisthokonta	Fungi	Dikarya	Basidiomycota	Agaricomycotina	Agaricomycetes	Agaricomycetidae	Agaricales	Psathyrellaceae	Psathyrella	Psathyrella aberdarensis
1	cellular organisms	Eukaryota	Opisthokonta	Fungi	Dikarya	Ascomycota	saccharomyceta	Pezizomycotina	leotiomyceta	Eurotiomycetes	Eurotiomycetidae	Onygenales	Arthrodermataceae	Arthroderma	Arthroderma uncinatum
3	cellular organisms	Eukaryota	Opisthokonta	Fungi	Dikarya	Ascomycota	saccharomyceta	Pezizomycotina	leotiomyceta	sordariomyceta	Leotiomycetes	Leotiomycetes incertae sedis	Myxotrichaceae	Amorphotheca	Amorphotheca resinae	Amorphotheca resinae ATCC 22711
8	cellular organisms	Eukaryota	Opisthokonta	Fungi	Dikarya	Ascomycota	saccharomyceta	Pezizomycotina	leotiomyceta	sordariomyceta	Leotiomycetes	Leotiomycetes incertae sedis	Scytalidium	Scytalidium lignicola
5	cellular organisms	Eukaryota	Opisthokonta	Fungi	Dikarya	Ascomycota	saccharomyceta	Pezizomycotina	leotiomyceta	dothideomyceta	Dothideomycetes	Dothideomycetes incertae sedis	Microthyriales	Microthyriaceae	Microthyrium	Microthyrium microscopicum
3	cellular organisms	Eukaryota	Opisthokonta	Fungi	Dikarya	Ascomycota	saccharomyceta	Pezizomycotina	leotiomyceta	sordariomyceta	Sordariomycetes	Xylariomycetidae	Xylariales	Diatrypaceae	Eutypa	Eutypa lata	Eutypa lata UCREL1
19	cellular organisms	Eukaryota	Opisthokonta	Fungi	Dikarya	Basidiomycota	Ustilaginomycotina	Exobasidiomycetes	Exobasidiales	Cryptobasidiaceae	Acaromyces	Acaromyces ingoldii
4	cellular organisms	Eukaryota	Opisthokonta	Fungi	Fungi incertae sedis	Zoopagomycota	Kickxellomycotina	Harpellomycetes	Harpellales
80	cellular organisms	Eukaryota	Opisthokonta	Fungi	Dikarya	Ascomycota	saccharomyceta	Pezizomycotina	leotiomyceta	dothideomyceta	Dothideomycetes	Pleosporomycetidae	Pleosporales
14	cellular organisms	Eukaryota	Opisthokonta	Fungi	Dikarya	Ascomycota	saccharomyceta	Pezizomycotina	leotiomyceta	Eurotiomycetes	Chaetothyriomycetidae	Chaetothyriales	Herpotrichiellaceae
5	cellular organisms	Eukaryota	Opisthokonta	Fungi	Dikarya	Ascomycota	saccharomyceta	Pezizomycotina	leotiomyceta	dothideomyceta	Dothideomycetes	Dothideomycetidae	Mycosphaerellales
2	cellular organisms	Eukaryota	Opisthokonta	Fungi	Dikarya	Ascomycota	saccharomyceta	Pezizomycotina	leotiomyceta	Eurotiomycetes	Eurotiomycetidae	Eurotiales	Aspergillaceae	Penicilliopsis	Penicilliopsis zonata	Penicilliopsis zonata CBS 506.65
2	cellular organisms	Eukaryota	Opisthokonta	Fungi	Dikarya	Basidiomycota	Agaricomycotina	Agaricomycetes	Agaricomycetes incertae sedis	Cantharellales	Ceratobasidiaceae	Rhizoctonia	Rhizoctonia solani	Rhizoctonia solani AG-8	Rhizoctonia solani AG-8 WAC10335
6	cellular organisms	Eukaryota	Opisthokonta	Fungi	Dikarya	Basidiomycota	Agaricomycotina	Agaricomycetes	Agaricomycetidae	Agaricales	Marasmiaceae	Moniliophthora	Moniliophthora roreri
1	cellular organisms	Eukaryota	Opisthokonta	Fungi	Dikarya	Ascomycota	saccharomyceta	Pezizomycotina	leotiomyceta	Eurotiomycetes	Eurotiomycetidae	Onygenales	Onygenales incertae sedis	Paracoccidioides	Paracoccidioides brasiliensis
1	cellular organisms	Eukaryota	Opisthokonta	Fungi	Dikarya	Basidiomycota	Agaricomycotina	Tremellomycetes	Holtermanniales	Holtermanniella	Holtermanniella festucosa
1	cellular organisms	Eukaryota	Opisthokonta	Fungi	Dikarya	Ascomycota	saccharomyceta	Pezizomycotina	leotiomyceta	Eurotiomycetes	Eurotiomycetidae	Eurotiales	Aspergillaceae	Aspergillus	Aspergillus neoniger	Aspergillus neoniger CBS 115656
2	cellular organisms	Eukaryota	Opisthokonta	Fungi	Dikarya	Ascomycota	saccharomyceta	Pezizomycotina	leotiomyceta	Eurotiomycetes	Eurotiomycetidae	Eurotiales	Aspergillaceae	Aspergillus	Aspergillus subgen. Nidulantes
2	cellular organisms	Eukaryota	Opisthokonta	Fungi	Dikarya	Ascomycota	saccharomyceta	Pezizomycotina	leotiomyceta	sordariomyceta	Sordariomycetes	Hypocreomycetidae	Hypocreales	Cordycipitaceae	Beauveria	Beauveria bassiana	Beauveria bassiana ARSEF 2860
1	cellular organisms	Eukaryota	Opisthokonta	Fungi	Dikarya	Ascomycota	saccharomyceta	Pezizomycotina	leotiomyceta	dothideomyceta	Dothideomycetes	Pleosporomycetidae	Mytilinidiales	Argynnaceae	Lepidopterella	Lepidopterella palustris	Lepidopterella palustris CBS 459.81
2	cellular organisms	Eukaryota	Opisthokonta	Fungi	Dikarya	Ascomycota	saccharomyceta	Pezizomycotina	leotiomyceta	sordariomyceta	Sordariomycetes	Hypocreomycetidae	Hypocreales	Nectriaceae	Fusarium	Fusarium sambucinum species complex	Fusarium poae
4	cellular organisms	Eukaryota	Opisthokonta	Fungi	Dikarya	Ascomycota	saccharomyceta	Pezizomycotina	leotiomyceta	sordariomyceta	Sordariomycetes	Sordariomycetidae	Sordariales	Chaetomiaceae	Thermothelomyces	Thermothelomyces thermophilus	Thermothelomyces thermophilus ATCC 42464
176	cellular organisms	Eukaryota	Opisthokonta	Fungi	Dikarya	Ascomycota	saccharomyceta	Pezizomycotina	leotiomyceta	dothideomyceta	Dothideomycetes	Pleosporomycetidae	Pleosporales	Pleosporineae	Phaeosphaeriaceae	Parastagonospora	Parastagonospora nodorum	Parastagonospora nodorum SN15
1	cellular organisms	Eukaryota	Opisthokonta	Fungi	Dikarya	Ascomycota	saccharomyceta	Pezizomycotina	leotiomyceta	dothideomyceta	Dothideomycetes	Pleosporomycetidae	Pleosporales	Pleosporineae	Didymellaceae	Didymella	Didymella keratinophila
25	cellular organisms	Eukaryota	Opisthokonta	Fungi	Dikarya	Ascomycota	saccharomyceta	Pezizomycotina	leotiomyceta	dothideomyceta	Dothideomycetes	Dothideomycetidae	Mycosphaerellales	Mycosphaerellaceae	Zymoseptoria
29	cellular organisms	Eukaryota	Opisthokonta	Fungi	Dikarya	Ascomycota	saccharomyceta	Pezizomycotina	leotiomyceta	Eurotiomycetes	Eurotiomycetidae	Eurotiales	Aspergillaceae	Aspergillus
3	cellular organisms	Eukaryota	Opisthokonta	Fungi	Dikarya	Ascomycota	saccharomyceta	Saccharomycotina	Saccharomycetes	Saccharomycetales	Debaryomycetaceae	Candida/Lodderomyces clade	Candida	Candida maltosa	Candida maltosa Xu316
16	cellular organisms	Eukaryota	Opisthokonta	Fungi	Dikarya	Ascomycota	saccharomyceta	Pezizomycotina	leotiomyceta	dothideomyceta	Dothideomycetes	Pleosporomycetidae	Pleosporales	Pleosporineae	Cucurbitariaceae	Pyrenochaeta	unclassified Pyrenochaeta	Pyrenochaeta sp. DS3sAY3a
14	cellular organisms	Eukaryota	Opisthokonta	Fungi	Fungi incertae sedis	Cryptomycota	Cryptomycota incertae sedis	Rozella	Rozella allomycis	Rozella allomycis CSF55
2	cellular organisms	Eukaryota	Opisthokonta	Fungi	Dikarya	Basidiomycota	Agaricomycotina	Agaricomycetes	Agaricomycetidae	Boletales
[truncated: 816 more rows]

## Sheet: Viruses
Read count	Classification	Clade	Kingdom	Phylum	Class	Order	Family	Genus	Species	Strain	Other
[truncated: 297 more rows]
