# Supplementary material for: Novel functional insights into the microbiome inhabiting marine plastic debris: critical considerations to counteract the challenges of thin biofilms using multi-omics and comparative metaproteomics.
Source: Research Square preprint supplement (doi:10.21203/rs.3.rs-3097262/v1), 2023-06-27
Supplement: Supplementary file 2 [file 3a400049710a0e30c66e1867.xlsx]

## Sheet: Relative_abundance_protein_quan
Pseudoalteromonas sp. MAG gene	Indirect1 rel. ab.	Direct3 rel. ab.	Indirect2 rel. ab.	Indirect3 rel. ab.	Direct1 rel. ab.	Direct2 rel. ab.	Mean rel. ab. (%)	protein name (DRAM annotation)	Function
bin.001.fasta_b09assembly_Contig_565_2	0.319034	1.3794	0.194226	0.425732	0.971227	0	0.548269	rank: C; 2-dehydro-3-deoxyphosphogluconate aldolase / (4S)-4-hydroxy-2-oxoglutarate aldolase [EC:4.1.2.14 4.1.3.42] (db=kegg)	Carbon metabolism
bin.001.fasta_b09assembly_Contig_1297_4	0.239581	0.451838	0.0996048	0.232772	0.36195	0.482026	0.311295	rank: C; 2-oxoglutarate dehydrogenase E2 component (dihydrolipoamide succinyltransferase) [EC:2.3.1.61] (db=kegg)	Carbon metabolism
bin.001.fasta_b09assembly_Contig_420_2	0.27023	0.432826	0.137353	0.22883	0.458639	0.354424	0.313717	rank: C; isocitrate lyase [EC:4.1.3.1] (db=kegg)	Carbon metabolism
bin.001.fasta_b09assembly_Contig_1297_8	0.155812	0.639666	0.217632	0.324605	2.2602	0.322396	0.653385	rank: C; succinate dehydrogenase / fumarate reductase, iron-sulfur subunit [EC:1.3.5.1 1.3.5.4] (db=kegg)	Carbon metabolism
bin.001.fasta_b09assembly_Contig_1297_2	0.0576904	0.131725	0.0871063	0.124031	0.210848	0.0827717	0.115695	rank: C; succinyl-CoA synthetase alpha subunit [EC:6.2.1.5] (db=kegg)	Carbon metabolism
bin.001.fasta_b09assembly_Contig_1297_3	0.320956	0.612754	0.233161	0.440931	2.8279	2.12998	1.09428	rank: C; succinyl-CoA synthetase beta subunit [EC:6.2.1.5] (db=kegg)	Carbon metabolism
bin.001.fasta_b09assembly_Contig_154_1	0.145865	0.706158	0.154308	0.0872947	0.50682	0.311387	0.318639	rank: C; transketolase [EC:2.2.1.1] (db=kegg)	Carbon metabolism
bin.001.fasta_b09assembly_Contig_1262_3	0.161185	0.191744	0.160014	0.390372	0.869273	0.706966	0.413259	rank: D; Citrate synthase, C-terminal domain [PF00285.24] (db=pfam)	Carbon metabolism
bin.001.fasta_b09assembly_Contig_847_3	0.169661	0.424408	0.145462	0.326426	0	0.778827	0.307464	rank: D; lactate/malate dehydrogenase, NAD binding domain [PF00056.26]; lactate/malate dehydrogenase, alpha/beta C-terminal domain [PF02866.21] (db=pfam)	Carbon metabolism
bin.001.fasta_b09assembly_Contig_129_2	0.150901	0.750307	0.118707	0.184345	0.760847	0.741108	0.451036	rank: D; Monomeric isocitrate dehydrogenase [PF03971.17] (db=pfam)	Carbon metabolism
bin.001.fasta_b09assembly_Contig_430_8	0.0375844	0.257952	0.138185	0.138109	0.908236	0.140971	0.270173	rank: C; purine-binding chemotaxis protein CheW (db=kegg)	Chemotaxis
bin.001.fasta_b09assembly_Contig_239_4	0.114389	0.0644887	0.103077	0.156049	0.326941	0.508549	0.212249	glycine hydroxymethyltransferase [EC:2.1.2.1]	Glycine metabolism
bin.001.fasta_b09assembly_Contig_1384_7	0.147191	0.656602	0.0903466	0.168916	0.611695	0.539463	0.369036	rank: C; glycine hydroxymethyltransferase [EC:2.1.2.1] (db=kegg)	Glycine metabolism
bin.001.fasta_b09assembly_Contig_367_1	0.54886	1.07268	0.616362	0.734538	0.919117	1.35115	0.873784	rank: C; biopolymer transport protein ExbB (db=kegg)	Membrane transport
bin.001.fasta_b09assembly_Contig_367_13	0.54886	1.07268	0.616362	0.734538	0.919117	1.35115	0.873784	rank: C; biopolymer transport protein ExbB (db=kegg)	Membrane transport
bin.001.fasta_b09assembly_Contig_438_7	0.216005	0.12962	0.206985	0.291226	0.140357	0.117831	0.183671	rank: C; cation/acetate symporter (db=kegg)	Membrane transport
bin.001.fasta_b09assembly_Contig_389_3	0.202185	0.326485	0.146879	0.159871	0.472365	0.26389	0.261946	rank: C; OmpA-OmpF porin, OOP family (db=kegg)	Membrane transport
bin.001.fasta_b09assembly_Contig_367_10	0.21761	0.100823	0.197944	0.240247	0.223025	0.143133	0.18713	rank: C; periplasmic protein TonB (db=kegg)	Membrane transport
bin.001.fasta_b09assembly_Contig_367_5	0.21761	0.100823	0.197944	0.240247	0.223025	0.143133	0.18713	rank: C; periplasmic protein TonB (db=kegg)	Membrane transport
bin.001.fasta_b09assembly_Contig_1320_2	0.0352096	0.392007	0.0509908	0.0471808	0.306691	0.100553	0.155439	rank: D; Carboxypeptidase regulatory-like domain [PF13620.9] (db=pfam)	Membrane transport
bin.001.fasta_b09assembly_Contig_945_3	0.137638	0.785737	0.0780579	0.166875	2.72665	0.28614	0.696849	rank: D; TonB dependent receptor [PF00593.27] (db=pfam)	Membrane transport
bin.001.fasta_b09assembly_Contig_246_4	0.0889826	0.191192	0.0735373	0.141811	0.252188	0.18885	0.156094	rank: D; TonB-dependent Receptor Plug Domain [PF07715.18] (db=pfam)	Membrane transport
bin.001.fasta_b09assembly_Contig_1214_5	0.352615	0.874672	0.188136	0.234373	0.508734	0.422916	0.430241	rank: C; Na+-transporting NADH:ubiquinone oxidoreductase subunit C [EC:7.2.1.1] (db=kegg)	NADH:ubiquinone reductase
bin.001.fasta_b09assembly_Contig_959_2	0.364657	0	0.286706	0.366488	3.10016	2.19696	1.0525	rank: C; F-type H+/Na+-transporting ATPase subunit alpha [EC:7.1.2.2 7.2.2.1] (db=kegg)	Oxidative phosphorylation
bin.001.fasta_b09assembly_Contig_606_3	0.30902	0.409479	0.224713	0.337102	0.640457	0.61044	0.421869	rank: C; F-type H+-transporting ATPase subunit b (db=kegg)	Oxidative phosphorylation
bin.001.fasta_b09assembly_Contig_407_2	0.288058	1.18829	0.172614	0.392783	7.1045	5.93486	2.51352	rank: C; FKBP-type peptidyl-prolyl cis-trans isomerase FkpA [EC:5.2.1.8] (db=kegg)	Protein folding
bin.001.fasta_b09assembly_Contig_401_7	0.318323	0.462248	0.172469	0.311977	1.30736	0.608071	0.530075	rank: C; trigger factor (db=kegg)	Protein processing
bin.001.fasta_b09assembly_Contig_401_6	0.208182	0.476323	0.206132	0.288444	5.69836	0.882413	1.29331	rank: D; Bacterial trigger factor protein (TF) C-terminus [PF05698.17] (db=pfam)	Protein processing
bin.001.fasta_b09assembly_Contig_1297_5	0.0699328	0.196363	0.0730382	0.0873227	0.147525	0.101622	0.112634	rank: D; Biotin-requiring enzyme [PF00364.25]; e3 binding domain [PF02817.20] (db=pfam)	Protein processing
bin.001.fasta_b09assembly_Contig_176_2	0.0678511	0.0763478	0.0661995	0.0812832	0.196384	0.262845	0.125152	rank: C; recombination protein RecA (db=kegg)	Replication and repair
bin.001.fasta_b09assembly_Contig_449_6	0.153775	0.446081	0.198913	0.42222	1.39256	0.664208	0.546294	rank: C; adenylosuccinate synthase [EC:6.3.4.4] (db=kegg)	Ribonucleotide biosynthesis
bin.001.fasta_b09assembly_Contig_403_4	0.202665	0.324795	0.248025	0.227629	1.573	0.631042	0.534526	rank: C; IMP dehydrogenase [EC:1.1.1.205] (db=kegg)	Ribonucleotide biosynthesis
bin.001.fasta_b09assembly_Contig_584_4	0.0974642	0.142701	0.188852	0.0748506	0.246665	0.193646	0.157363	rank: D; Adenylate kinase [PF00406.25]; Adenylate kinase, active site lid [PF05191.17]; AAA domain [PF13207.9] (db=pfam)	Ribonucleotide biosynthesis
bin.001.fasta_b09assembly_Contig_1246_5	0.243281	0.17782	0.237125	0.115826	0.178937	0.298009	0.2085	large subunit ribosomal protein L1	ribosomal structure
bin.001.fasta_b09assembly_Contig_1254_1	1.12476	0.447754	0.575727	0.390662	4.06277	0.99169	1.26556	large subunit ribosomal protein L25	ribosomal structure
bin.001.fasta_b09assembly_Contig_346_4	0.3253	0.480306	0.272197	0.215453	0.605776	0.89881	0.466307	rank: C; large subunit ribosomal protein L1 (db=kegg)	ribosomal structure
bin.001.fasta_b09assembly_Contig_1246_4	0.505678	1.1148	0.350255	0.35144	1.03674	1.38418	0.790515	rank: C; large subunit ribosomal protein L11 (db=kegg)	ribosomal structure
bin.001.fasta_b09assembly_Contig_346_5	0.505678	1.1148	0.350255	0.35144	1.03674	1.38418	0.790515	rank: C; large subunit ribosomal protein L11 (db=kegg)	ribosomal structure
bin.001.fasta_b09assembly_Contig_873_2	0.318236	2.43542	0.237754	0.279989	2.95483	0.594647	1.13681	rank: C; large subunit ribosomal protein L14 (db=kegg)	ribosomal structure
bin.001.fasta_b09assembly_Contig_1207_1	0.622845	0.498816	0.607943	0.485786	3.45377	2.13653	1.30095	rank: C; large subunit ribosomal protein L17 (db=kegg)	ribosomal structure
bin.001.fasta_b09assembly_Contig_978_4	0.344926	0.44439	0.192244	0.191759	0.682241	0.680025	0.422598	rank: C; large subunit ribosomal protein L19 (db=kegg)	ribosomal structure
bin.001.fasta_b09assembly_Contig_886_4	0.173381	0.255173	0.220409	0.221346	0.98994	0.585844	0.407682	rank: C; large subunit ribosomal protein L2 (db=kegg)	ribosomal structure
bin.001.fasta_b09assembly_Contig_446_3	0.329683	0.353096	0.55149	0.276547	0.952488	0.781451	0.540792	rank: C; large subunit ribosomal protein L20 (db=kegg)	ribosomal structure
bin.001.fasta_b09assembly_Contig_410_1	0.310826	2.20848	0.526341	0.286703	2.40003	1.59602	1.2214	rank: C; large subunit ribosomal protein L21 (db=kegg)	ribosomal structure
bin.001.fasta_b09assembly_Contig_31_3	0.533934	2.34689	0.252408	0.331098	6.94734	4.43587	2.47459	rank: C; large subunit ribosomal protein L22 (db=kegg)	ribosomal structure
bin.001.fasta_b09assembly_Contig_187_2	0.727613	0.731245	0.446974	0.428994	3.0858	0.858514	1.04652	rank: C; large subunit ribosomal protein L25 (db=kegg)	ribosomal structure
bin.001.fasta_b09assembly_Contig_704_4	0.15661	0.600487	0.255945	0.152367	5.77643	1.61553	1.42623	rank: C; large subunit ribosomal protein L3 (db=kegg)	ribosomal structure
bin.001.fasta_b09assembly_Contig_765_6	0.280965	0.306938	0.20888	0.186976	0.706924	0.426052	0.352789	rank: C; large subunit ribosomal protein L6 (db=kegg)	ribosomal structure
bin.001.fasta_b09assembly_Contig_346_2	0.315853	1.52212	0.279336	0.94969	0.561575	0.690128	0.719784	rank: C; large subunit ribosomal protein L7/L12 (db=kegg)	ribosomal structure
bin.001.fasta_b09assembly_Contig_979_4	0.380256	0.692217	0.202356	0.503516	2.29138	1.00205	0.845296	rank: C; large subunit ribosomal protein L9 (db=kegg)	ribosomal structure
bin.001.fasta_b09assembly_Contig_8_2	0.250826	0.740567	0.235172	0.446004	1.32139	0.709893	0.617308	rank: C; small subunit ribosomal protein S1 (db=kegg)	ribosomal structure
bin.001.fasta_b09assembly_Contig_704_6	0.582027	0.545158	0.323016	0.476251	1.14954	0.696352	0.628725	rank: C; small subunit ribosomal protein S10 (db=kegg)	ribosomal structure
bin.001.fasta_b09assembly_Contig_886_5	0.16995	0.386032	0.182675	0.214462	0.183199	0.469786	0.267684	rank: C; small subunit ribosomal protein S19 (db=kegg)	ribosomal structure
bin.001.fasta_b09assembly_Contig_765_5	0.105883	2.33283	0.0920825	0.0885314	0.366055	0.587447	0.595471	rank: C; small subunit ribosomal protein S5 (db=kegg)	ribosomal structure
bin.001.fasta_b09assembly_Contig_979_7	0.320658	0.268512	0.313664	0.378525	1.35134	0.618523	0.54187	rank: C; small subunit ribosomal protein S6 (db=kegg)	ribosomal structure
bin.001.fasta_b09assembly_Contig_1296_5	0.241003	0.295658	0.181626	0.224588	0.151379	0.384896	0.246525	rank: C; small subunit ribosomal protein S7 (db=kegg)	ribosomal structure
bin.001.fasta_b09assembly_Contig_873_1	0.41867	0.285449	0.742823	0.320202	1.68515	1.00927	0.743595	rank: D; Ribosomal proteins 50S L24/mitochondrial 39S L24 [PF17136.7]; Ribosomal proteins L26 eukaryotic, L24P archaeal [PF16906.8] (db=pfam)	ribosomal structure
bin.001.fasta_b09assembly_Contig_227_4	0.0449521	0.103519	0.0415807	0.0657494	0.166986	0.123807	0.091099	rank: C; polyribonucleotide nucleotidyltransferase [EC:2.7.7.8] (db=kegg)	RNA degradation
bin.001.fasta_b09assembly_Contig_1207_2	0.313537	3.44979	0.25891	0.335351	7.375	1.56601	2.21643	rank: C; DNA-directed RNA polymerase subunit alpha [EC:2.7.7.6] (db=kegg)	RNA polymerase
bin.001.fasta_b09assembly_Contig_1296_1	0.115667	0.409964	0.151639	0.115816	1.00893	0.498446	0.38341	rank: C; DNA-directed RNA polymerase subunit beta [EC:2.7.7.6] (db=kegg)	RNA polymerase
bin.001.fasta_b09assembly_Contig_1296_3	0.109343	0	0.097066	0.258167	2.88205	3.13454	1.08019	rank: C; DNA-directed RNA polymerase subunit beta' [EC:2.7.7.6] (db=kegg)	RNA polymerase
bin.001.fasta_b09assembly_Contig_568_3	0.129372	0.259726	0.0575069	0.0919943	0.544725	0.227454	0.218463	rank: C; transcription termination/antitermination protein NusA (db=kegg)	Transcription factors
bin.001.fasta_b09assembly_Contig_60_4	0.30877	0.396609	0.154966	0.506038	0.645067	0.55593	0.427896	rank: C; elongation factor Ts (db=kegg)	Translation factors
bin.001.fasta_b09assembly_Contig_432_4	1.44356	1.58565	1.37643	1.25061	3.94188	3.93211	2.25504	rank: D; Elongation factor Tu C-terminal domain [PF03143.20] (db=pfam)	Translation factors
bin.001.fasta_b09assembly_Contig_771_4	0.303205	0.316293	0.143335	0.202585	0.605272	0.156344	0.287839	rank: D; nan (db=pfam)	Unknown
bin.001.fasta_b09assembly_Contig_1195_1	0.171065	0	0.0669372	0.0959486	3.5122	2.67746	1.08727	rank: D; Protein of unknown function (DUF1329) [PF07044.14] (db=pfam)	Unknown
bin.001.fasta_b09assembly_Contig_1038_1	0.195236	0.45721	0.104979	0.257376	0.531074	0.416413	0.327048	rank: D; Protein of unknown function (DUF3450) [PF11932.11] (db=pfam)	Unknown
bin.001.fasta_b09assembly_Contig_606_1	0.356132	2.21082	0.229241	0.277468	1.73794	0.66026	0.911977	unknown function	Unknown
bin.001.fasta_b09assembly_Contig_534_3	0.194717	0.291909	0.162965	0.147004	0.29707	0.257108	0.225129	unknown function	Unknown
